# Supplementary material for: Global Transcriptome and Coexpression Network Analyses Reveal New Insights Into Somatic Embryogenesis in Hybrid Sweetgum (Liquidambar styraciflua × Liquidambar formosana)
Source: Frontiers journal article supplement (doi:10.3389/fpls.2021.751866), 2021-11-22
Supplement: Data_Sheet_3.PDF [file Data_Sheet_3.PDF]

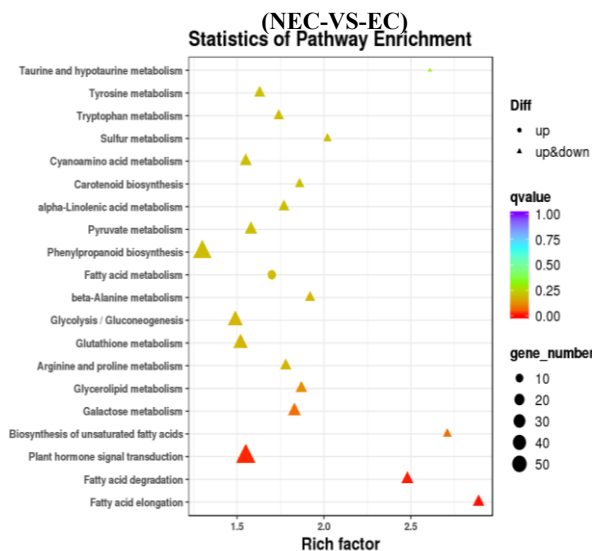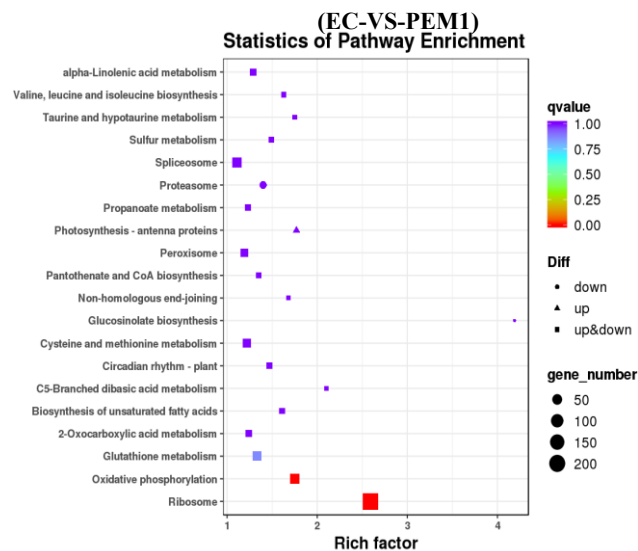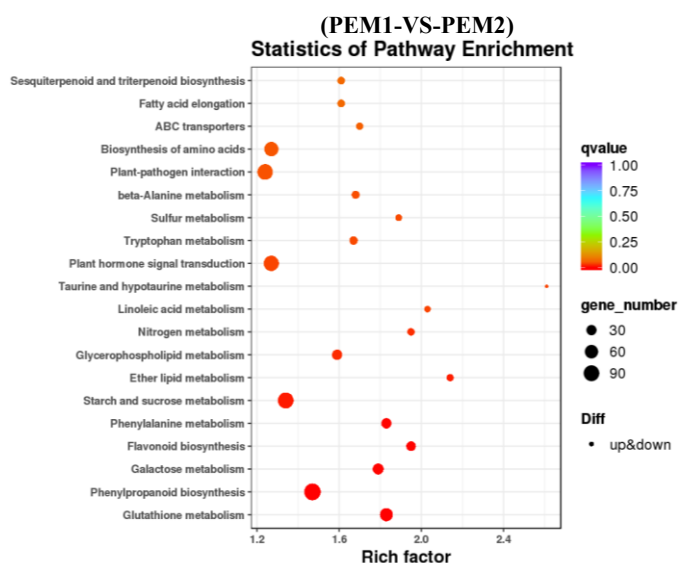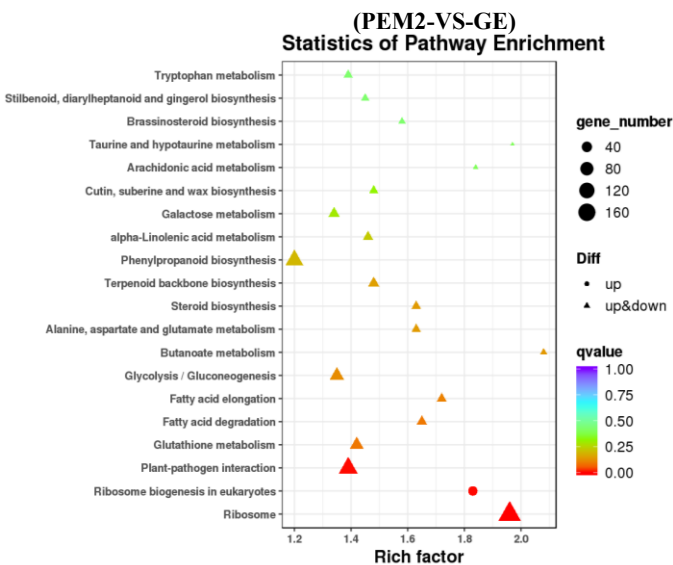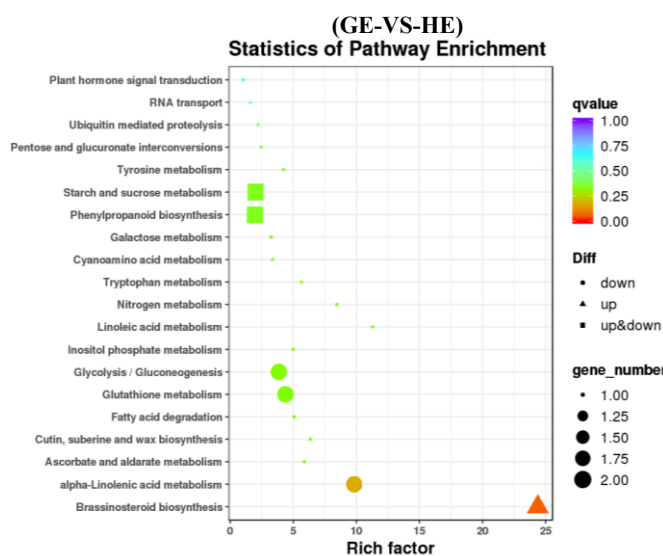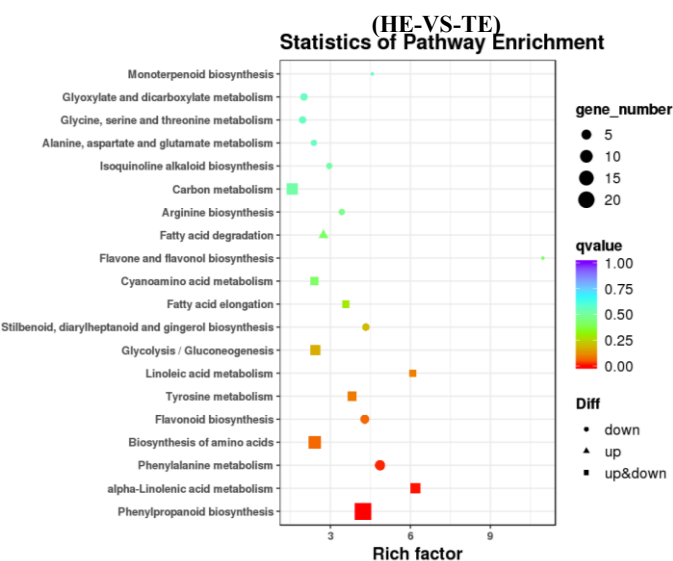

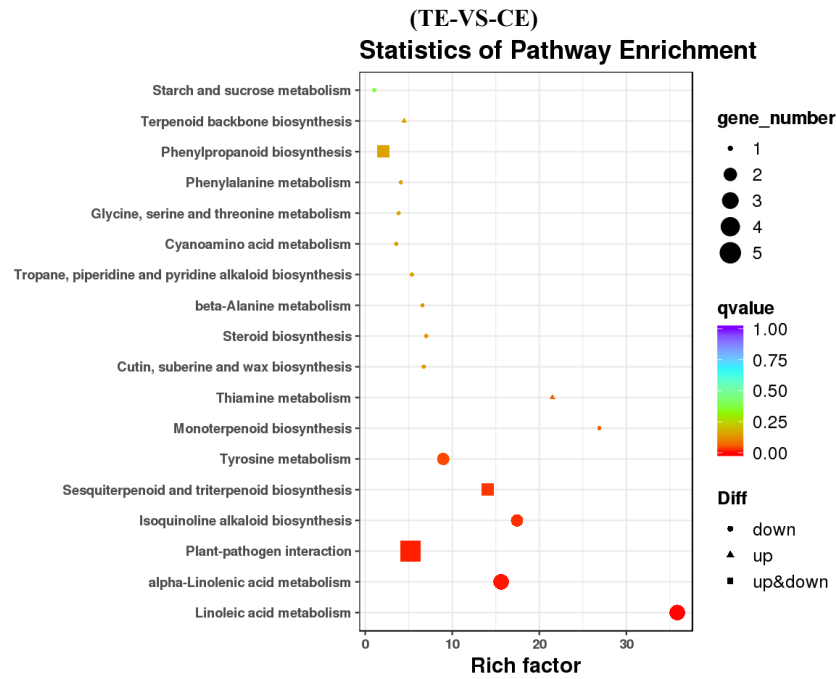

**Supplementary Figure 3:** Scatterplot of the DEG-enriched KEGG pathway in the pairwise comparisons of NEC\_vs\_EC, EC\_vs\_PEM1, PEM1\_vs\_PEM2, PEM2\_vs\_GE, GE\_vs\_HE, HE\_vs\_TE and TE\_vs\_CE. Each comparison group takes the first sample period as the control group, and the latter as the experimental group. Rich factor represents the ratio of the number of DEGs and the number of all unigenes in the pathway. The Q value is the corrected P-value.
