# Supplementary material for: Global Transcriptome and Coexpression Network Analyses Reveal New Insights Into Somatic Embryogenesis in Hybrid Sweetgum (Liquidambar styraciflua × Liquidambar formosana)
Source: Front Plant Sci. 2021 Nov 22;12:751866. doi: 10.3389/fpls.2021.751866 (PMC8645980; doi:10.3389/fpls.2021.751866)
Supplement: Supplementary file 2 [file Table_2.XLSX]

## Sheet: 19512 genes in WGCNA
GeneID	kME	ModuleColor	Annotation		NEC	EC	PEM1	PEM2	GE	HE	TE	CE	L	R	S
EVM0007181	0.830582	salmon	beta-glucosidase 13-like isoform X1 [Quercus suber]		0.222789	2.10973	1.61587	0.789862	3.9593	1.45939	0.330995	0.292607	0	0.16596	0.0742683
Liquidambar_formosana_newGene_8754	0.860746	salmon	#N/A		0	3.95596	2.45318	1.56601	6.84337	6.39283	6.08107	5.89415	0	0	0.0277907
EVM0027145	0.663797	salmon	hypothetical protein KK1_014247, partial [Cajanus cajan]		23.9631	27.6137	0.453868	0.204568	44.0647	27.0478	16.1534	8.75079	0	21.261	16.1988
EVM0027149	0.854602	salmon	PREDICTED: uncharacterized protein LOC100258588 isoform X2 [Vitis vinifera]		29.1743	33.5221	27.6991	22.277	40.7891	38.8738	34.9901	28.0178	10.7653	15.3027	13.4404
EVM0026818	0.429754	salmon	unnamed protein product, partial [Vitis vinifera]		34.0619	35.3706	54.6522	48.628	58.144	45.8282	46.0605	46.6229	43.1049	57.3504	38.3003
EVM0024430	0.893967	salmon	PREDICTED: uncharacterized protein LOC100250952 [Vitis vinifera]		88.976	119.497	146.869	86.6789	201.232	198.258	166.751	157.343	65.2237	79.9676	59.194
EVM0020323	0.93544	salmon	polygalacturonase-inhibiting protein [Vitis thunbergii]		43.0555	69.4709	20.5363	2.7779	363.613	207.098	222.198	263.473	1.86171	4.45234	3.58575
EVM0013267	0.913901	salmon	PREDICTED: uncharacterized protein LOC100244129 isoform X1 [Vitis vinifera]		12.7847	15.2314	20.379	18.2553	33.5255	25.1963	26.7574	26.4529	6.7481	7.79898	5.26917
Liquidambar_formosana_newGene_188	0.899825	salmon	#N/A		0.724823	1.9562	2.64484	0.775008	11.0795	7.23466	7.68612	6.62756	0.0863863	0.697425	1.33325
EVM0006040	0.611343	salmon	PREDICTED: uncharacterized protein LOC100243660 [Vitis vinifera]		4.54891	1.92672	2.99698	1.68184	5.66695	1.26023	0.483919	0.421759	3.27018	0.088896	0.113247
EVM0019152	0.884728	salmon	PREDICTED: heavy metal-associated isoprenylated plant protein 3-like [Nelumbo nucifera]		292.839	157.057	348.645	89.5782	492.022	487.988	435.398	322.812	132.857	233.217	171.854
EVM0000100	0.943461	salmon	cysteine-rich repeat secretory protein 38-like [Prunus avium]		29.2919	2.15065	2.08117	1.26291	46.7279	19.4764	10.0841	11.3712	0.0655187	0.717692	0.110923
EVM0008077	0.689936	salmon	PREDICTED: MADS-box protein FLOWERING LOCUS C-like isoform X4 [Populus euphratica]		0.0440083	1.21089	2.86969	1.03611	3.67618	2.27166	2.6842	1.89483	0.432938	0.518563	2.17643
EVM0006509	0.917508	salmon	2-oxoacid_dh domain-containing protein/Biotin_lipoyl domain-containing protein/E3_binding domain-containing protein [Cephalotus follicularis]		30.9103	34.5771	25.3961	27.7018	43.9051	47.7553	33.4092	29.0192	11.9268	20.9694	16.4973
Liquidambar_formosana_newGene_8135	0.902387	salmon	Ankyrin repeat family protein, putative [Theobroma cacao]		0.65811	1.35573	0.49788	1.12894	2.58145	1.51164	2.10465	2.19502	0.297446	0.172192	0.499493
EVM0016971	0.852696	salmon	PREDICTED: UDP-arabinose 4-epimerase 1 [Theobroma cacao]		78.2307	100.77	122.02	122.365	165.861	147.451	100.694	114.412	51.3719	98.9321	82.0345
EVM0002970	0.807979	salmon	unnamed protein product [Coffea canephora]		11.2744	10.6335	21.8365	13.2508	25.4193	14.751	20.5054	21.6736	9.44145	15.5389	9.33228
Liquidambar_formosana_newGene_7519	0.924194	salmon	PREDICTED: protein PHOSPHATE STARVATION RESPONSE 3-like [Nelumbo nucifera]		1.69981	2.90835	2.20537	0.827444	9.8779	7.88453	2.61691	1.78323	0.180678	0.240341	0
EVM0025020	0.799425	salmon	PREDICTED: FAD-dependent urate hydroxylase [Ricinus communis]		0.418656	0.453474	4.57906	0.931897	13.9267	11.6901	1.54454	0.335255	0	0.646048	0
EVM0023730	0.814036	salmon	probable LRR receptor-like serine/threonine-protein kinase At1g53440 isoform X2 [Jatropha curcas]		2.19231	1.00569	1.04164	1.52988	6.37721	4.3355	4.96149	5.58357	3.11373	1.09038	1.22982
EVM0010157	0.939594	salmon	unnamed protein product, partial [Vitis vinifera]		98.1946	108.004	82.3215	82.5021	195.327	97.3822	88.9781	90.1907	2.03671	8.44479	3.72909
Liquidambar_formosana_newGene_14492	0.891629	salmon	uncharacterized protein LOC112021218 [Quercus suber]		0.706229	2.60096	1.8973	2.16298	4.84621	5.43716	4.18502	3.93148	0.0700173	0.341003	0.498042
Liquidambar_formosana_newGene_6561	0.866045	salmon	#N/A		0.073831	0.70258	0.694544	0.204386	1.63797	1.07693	0.42938	0.390274	0.157075	0.073682	0.0838943
EVM0004212	0.520217	salmon	hypothetical protein POPTR_001G437900v3 [Populus trichocarpa]		2.11634	1.26269	2.49876	0.649437	3.09768	1.75325	1.25842	0.828639	2.00967	0.753881	0.430159
EVM0002582	0.850967	salmon	carboxylesterase 1-like [Quercus suber]		10.0997	21.1119	36.6748	11.5859	55.4429	58.6424	27.9823	21.1083	7.68952	10.8266	1.04046
EVM0013637	0.835355	salmon	chloroplast envelope quinone oxidoreductase homolog isoform X2 [Hevea brasiliensis]		2.90893	5.89456	2.04049	0.947465	43.0777	45.6481	22.2201	15.8491	1.41246	1.04101	1.70192
EVM0011096	0.59826	salmon	Myb domain protein 112 isoform 1 [Theobroma cacao]		52.0496	13.1572	63.1609	2.40317	91.9068	58.0949	36.4963	21.1142	28.9293	109.5	25.1774
EVM0020213	0.747643	salmon	uncharacterized protein LOC110661323 [Hevea brasiliensis]		8.91134	15.6414	17.1719	11.0535	21.5204	17.7558	18.5317	15.0715	9.07035	17.372	14.0786
EVM0004392	0.856644	salmon	PREDICTED: SNF1-related protein kinase regulatory subunit beta-1 [Vitis vinifera]		82.0174	35.6594	49.4738	33.5989	107.643	58.5242	83.4473	82.8546	30.6447	31.0328	34.2596
EVM0024921	0.473916	salmon	PREDICTED: mitochondrial dicarboxylate/tricarboxylate transporter DTC [Vitis vinifera]		80.6409	106.93	69.2328	79.8092	109.032	146.005	71.0104	59.5744	99.2673	104.524	82.1032
EVM0026531	0.712198	salmon	PREDICTED: cysteine-rich repeat secretory protein 38 [Citrus sinensis]		108.222	11.7959	42.8353	45.2675	86.3647	40.6811	5.99231	6.17852	0.201363	23.9619	0.0821753
EVM0026535	0.849716	salmon	PREDICTED: protein BASIC PENTACYSTEINE2-like [Ziziphus jujuba]		32.9211	32.787	30.756	35.4399	50.9459	43.0218	43.614	39.1893	19.6163	20.683	17.2753
EVM0013847	0.932142	salmon	queuosine salvage protein-like isoform X2 [Durio zibethinus]		20.6843	30.3615	26.125	17.4901	61.6831	74.809	50.2601	47.6285	3.05816	11.4518	5.46167
EVM0019214	0.926883	salmon	unnamed protein product, partial [Vitis vinifera]		15.1093	10.7104	12.6611	1.43647	157.831	98.6076	75.0219	63.3612	5.92496	18.2478	50.2519
EVM0028565	0.797649	salmon	PREDICTED: G-box-binding factor 1 [Vitis vinifera]		42.0632	70.5612	68.9275	69.3928	146.229	124.909	131.363	143.484	115.825	45.4734	61.214
EVM0023284	0.83958	salmon	Thioredoxin [Trema orientalis]		38.6944	45.2222	54.8411	35.0751	87.6809	89.1812	68.7955	56.2375	8.61479	18.2561	11.3159
EVM0001137	0.964511	salmon	PREDICTED: receptor-like protein kinase 5 [Vitis vinifera]		2.32831	3.74216	4.44422	1.14011	8.54738	8.2854	5.36164	4.32967	1.14564	1.00725	1.13432
Liquidambar_formosana_newGene_5684	0.769645	salmon	PREDICTED: F-box protein At5g07610-like [Citrus sinensis]		24.0801	1.6399	1.70143	1.29102	11.5189	1.61185	1.16966	1.09324	0	0.00860833	0
Liquidambar_formosana_newGene_5685	0.788921	salmon	PREDICTED: F-box protein At5g07610-like [Citrus sinensis]		4.78743	0.387568	0.497061	0.306099	2.71179	0.318484	0.092873	0.351711	0	0.0114203	0
EVM0008244	0.805762	salmon	uncharacterized protein LOC111901541 [Lactuca sativa]		27.288	24.4482	14.1456	17.9043	35.402	29.8356	37.3839	35.9044	10.6094	10.5192	15.6527
EVM0009386	0.883208	salmon	Mitochondrial tricarboxylate/dicarboxylate carrier protein [Handroanthus impetiginosus]		7.81525	12.4653	13.5155	10.4214	31.3437	24.7785	28.3055	28.0294	3.55664	5.83931	6.43862
EVM0002290	0.776581	salmon	unnamed protein product, partial [Vitis vinifera]		21.2798	11.6859	3.84036	3.39402	11.9707	12.7066	2.72598	1.11032	0.100826	1.49459	0.240154
EVM0016101	0.74528	salmon	PREDICTED: beta-amyrin 28-oxidase-like [Juglans regia]		181.16	179.239	365.813	58.9573	695.937	722.531	376.338	268.377	266.16	311.872	203.938
EVM0010619	0.834277	salmon	PREDICTED: ethylene-responsive transcription factor ERF098 [Juglans regia]		0.342461	13.1321	12.3091	10.4933	20.6794	16.1147	12.6872	10.8211	0	0.098226	0.050588
EVM0011560	0.980137	salmon	PREDICTED: putative UDP-rhamnose:rhamnosyltransferase 1 [Juglans regia]		6.28077	6.96532	2.04991	2.68231	27.7944	13.103	15.4958	12.0569	0.496476	1.94466	0.256954
EVM0029000	0.902315	salmon	hypothetical protein VITISV_001504 [Vitis vinifera]		0.099679	0.569487	0.375182	0.50457	2.29156	1.13314	0.90431	0.88166	0.293809	0.111863	0.98304
Liquidambar_formosana_newGene_6292	0.608928	salmon	putative disease resistance protein RGA3 [Herrania umbratica]		5.0451	10.0557	11.2462	8.42568	17.5345	19.0407	13.4813	13.0934	18.1168	3.8867	11.2827
EVM0023560	0.84832	salmon	PREDICTED: protein DOG1-like 4 [Vitis vinifera]		3.39849	500.097	277.313	119.848	783.353	458.851	296.56	149.423	4.54765	6.53354	10.2304
EVM0001079	0.811586	salmon	WW domain containing protein [Trema orientalis]		55.6815	54.9285	52.8817	61.9313	81.534	75.0504	64.8524	71.1116	43.6492	45.7979	46.7686
EVM0009413	0.902354	salmon	PREDICTED: uncharacterized protein LOC100254594 isoform X1 [Vitis vinifera]		3.55133	2.28879	2.48002	2.46038	5.20296	3.29768	4.09836	4.96305	0.566658	1.389	0.921726
EVM0027653	0.717175	salmon	unnamed protein product, partial [Vitis vinifera]		20.3189	5.04236	6.98693	5.2982	22.7952	11.6135	10.6174	13.7707	22.7224	4.55204	0.698465
EVM0012732	0.638648	salmon	PREDICTED: endochitinase EP3-like [Nelumbo nucifera]		12.2316	8.94912	47.813	1.60219	161.984	86.4121	57.3118	30.5351	34.7346	44.0123	43.4338
EVM0012737	0.549931	salmon	PREDICTED: uncharacterized protein LOC100267467 [Vitis vinifera]		2.19636	0.751476	2.16602	4.5357	6.33917	1.1461	0.499961	0.542873	0.364047	6.83613	0.136593
EVM0017549	0.924785	salmon	cysteine-rich repeat secretory protein 38-like [Prunus avium]		11.3805	0.729277	0.976501	0.759325	12.1775	5.19079	3.1029	2.83527	0.0235477	0.309485	0.076136
EVM0001842	0.842781	salmon	asparagine--tRNA ligase, cytoplasmic 2 [Citrus clementina]		0.220289	4.13557	0.955778	0.84573	6.59531	11.3178	4.8467	2.15564	0.215267	0.194265	0.371333
EVM0018455	0.956397	salmon	PREDICTED: delta-1-pyrroline-5-carboxylate dehydrogenase 12A1, mitochondrial isoform X1 [Vitis vinifera]		27.8072	40.9053	20.0881	21.2661	72.2628	44.5169	48.2415	46.5742	21.4138	17.6595	23.7841
EVM0020684	0.915018	salmon	phytosulfokine receptor 2 [Durio zibethinus]		8.04781	9.12948	11.9693	9.43377	18.4221	19.4297	13.1454	10.9465	1.615	2.47682	2.6343
EVM0028355	0.953231	salmon	beta-glucosidase 1 GH1 family [Camellia sinensis]		37.7698	28.1522	16.8662	2.5289	251.449	102.608	72.4029	57.5583	0.153158	0.166908	0
EVM0014778	0.780187	salmon	PREDICTED: uncharacterized protein LOC104603387 [Nelumbo nucifera]		9.99937	5.5253	25.4622	1.47379	68.6671	29.3821	38.0156	23.6988	10.9721	12.9146	17.1064
EVM0024918	0.930283	salmon	protein SRG1-like [Quercus suber]		21.4187	20.3761	10.476	1.23421	83.3767	60.6875	24.6745	13.2607	2.18599	0.918674	0.474981
EVM0006222	0.922431	salmon	Cyclin B2,3 isoform 1 [Theobroma cacao]		21.2474	30.8844	17.7513	10.3257	50.3118	29.1322	21.7051	20.2581	12.6559	3.77331	5.35118
EVM0027115	0.851914	salmon	hydroxymethylglutaryl-CoA synthase-like [Durio zibethinus]		268.214	354.767	428.982	315.998	624.932	701.666	304.706	210.591	145.208	173.46	86.2094
EVM0012674	0.961062	salmon	PREDICTED: NEDD8-conjugating enzyme Ubc12 [Ricinus communis]		38.3854	37.9893	20.486	26.92	90.3744	54.2348	55.4273	49.9581	18.5409	31.9414	16.7582
EVM0019769	0.754454	salmon	PREDICTED: probable aminotransferase TAT2 isoform X1 [Nelumbo nucifera]		38.1054	15.4663	22.8809	27.0674	47.0631	16.0987	16.5375	15.2067	18.9717	27.2703	9.82205
EVM0010763	0.563468	salmon	PREDICTED: LEAF RUST 10 DISEASE-RESISTANCE LOCUS RECEPTOR-LIKE PROTEIN KINASE-like 2.4 isoform X1 [Vitis vinifera]		0.262758	0.306342	2.50353	0.0270113	3.4268	3.36681	1.00597	0.900264	1.30667	0.44911	1.89188
EVM0022618	0.971504	salmon	hypothetical protein VITISV_012616 [Vitis vinifera]		0.561116	1.63012	0.757112	0	15.4515	4.58336	5.66844	3.07747	0.0293043	0.137893	0.0689453
Liquidambar_formosana_newGene_6673	0.932489	salmon	#N/A		0.085987	0.0721467	0.246772	0.506777	1.04619	1.09418	0.262998	0.499086	0.0970717	0.0386613	0.047214
EVM0001452	0.944446	salmon	#N/A		0	13.7122	3.02313	2.76221	35.3115	16.2458	23.8493	16.6897	0	0	0
EVM0028504	0.606155	salmon	branched-chain-amino-acid aminotransferase 2, chloroplastic-like [Hevea brasiliensis]		4.962	3.8705	3.85304	0.946641	13.765	9.42077	10.2649	8.10521	12.2483	3.72345	9.47951
EVM0010166	0.867055	salmon	PREDICTED: serine/threonine-protein kinase HT1 [Vitis vinifera]		17.9864	22.392	22.8305	21.5566	53.4083	61.2084	25.2705	22.918	20.0313	16.284	27.9443
EVM0021723	0.918638	salmon	PREDICTED: phosphomevalonate kinase isoform X1 [Vitis vinifera]		37.6993	46.1347	30.0403	26.8235	52.3225	69.4591	37.3444	30.3009	15.3109	28.7241	19.1896
EVM0013379	0.822344	salmon	PREDICTED: uncharacterized protein LOC100261105 [Vitis vinifera]		12.3002	10.0012	19.9489	18.2243	52.8955	34.1431	24.8228	25.5623	6.29232	37.5665	2.46893
EVM0004263	0.913947	salmon	Clathrin light chain [Macleaya cordata]		27.5829	72.1871	61.5615	54.7383	105.995	74.9917	75.6913	73.0332	24.2653	21.0353	14.2829
EVM0007797	0.930634	salmon	pyruvate, phosphate dikinase, chloroplastic-like [Quercus suber]		51.0598	36.12	23.6239	12.3923	206.714	64.8354	123.708	145.998	64.9857	2.94289	7.14003
EVM0010557	0.875943	salmon	PREDICTED: NAC domain-containing protein 17-like isoform X2 [Juglans regia]		97.5925	98.1173	98.0268	93.6864	120.415	116.744	104.631	91.5319	57.8883	53.7763	56.9157
EVM0022482	0.872569	salmon	PREDICTED: E3 ubiquitin-protein ligase MIEL1 [Vitis vinifera]		222.095	121.167	313.568	259.059	516.1	197.03	331.78	376.392	56.2517	89.8852	111.492
EVM0022483	0.854457	salmon	PREDICTED: exopolygalacturonase [Vitis vinifera]		0.00928867	0.100939	0.197616	0	1.77756	1.91409	0.930139	0.315282	0.00898933	0	0.0457287
EVM0004434	0.61407	salmon	PREDICTED: ribosomal RNA small subunit methyltransferase, chloroplastic [Vitis vinifera]		14.4619	7.93254	5.62134	4.5927	15.8657	6.64145	9.34784	7.4102	6.86197	3.20066	2.37541
EVM0018685	0.948394	salmon	PREDICTED: uncharacterized protein LOC105121553 isoform X2 [Populus euphratica]		1.01379	2.29488	2.13694	0.324625	7.34656	2.01948	2.11818	2.94626	0.102823	1.09454	0.064974
EVM0001104	0.930068	salmon	PREDICTED: cationic amino acid transporter 1 [Vitis vinifera]		30.1686	29.2036	38.2386	29.9972	83.0201	74.9329	61.068	65.1198	17.687	19.0797	11.102
Liquidambar_formosana_newGene_10768	0.860793	salmon	PREDICTED: uncharacterized protein LOC109008229 [Juglans regia]		1.36849	1.94439	1.26297	2.94435	7.93337	2.70053	5.20987	5.04449	2.94258	0.83349	1.6709
EVM0022126	0.757412	salmon	copper-transporting ATPase PAA2, chloroplastic [Quercus suber]		13.1816	29.1807	56.1076	21.8241	70.7999	41.2328	24.9869	22.0252	35.4338	17.7283	11.6417
EVM0006365	0.844895	salmon	PREDICTED: FAD-dependent urate hydroxylase [Ricinus communis]		0.288996	0.208605	0.123445	0.996413	3.83921	3.98138	2.34246	1.65285	0	0.182735	0
Liquidambar_formosana_newGene_12681	0.899454	salmon	line-1 retrotransposable element orf2 protein [Quercus suber]		0.431265	2.62059	2.75845	1.58657	3.97733	3.57967	3.51201	3.64717	0.499773	0.470856	0.699191
EVM0014575	0.852163	salmon	putative ABC transporter C family member 15 [Quercus suber]		1.35774	2.11453	2.20345	3.06625	11.522	5.4168	4.85419	5.72517	1.52023	0.400859	0.086874
EVM0016321	0.596002	salmon	PREDICTED: probable LRR receptor-like serine/threonine-protein kinase At1g53440 isoform X1 [Vitis vinifera]		14.638	5.17777	9.15159	9.14729	18.4669	13.2393	14.38	18.671	14.2641	9.43066	15.5449
EVM0024865	0.83964	salmon	probable WRKY transcription factor 75 [Herrania umbratica]		47.1127	4.33199	17.443	5.85374	44.7142	23.0187	15.3236	17.1764	7.37062	17.7727	8.50815
Liquidambar_formosana_newGene_4002	0.928347	salmon	chaperone protein dnaJ 1, mitochondrial-like, partial [Quercus suber]		0.2008	0.82577	0.678809	0.467193	2.04134	1.0183	1.36288	1.66246	0	0.006052	0.105079
EVM0008535	0.899403	salmon	uncharacterized protein LOC111985904 [Quercus suber]		28.4654	37.5374	39.9562	33.8324	51.7984	49.6114	44.9321	35.462	21.4477	29.2848	20.6096
EVM0000045	0.965781	salmon	PREDICTED: uncharacterized protein LOC100243216 isoform X1 [Vitis vinifera]		23.5056	20.1535	20.5596	19.0365	42.104	36.5843	33.6998	33.0503	9.16531	15.1438	11.942
EVM0008390	0.374788	salmon	pyruvate dehydrogenase complex E1 alpha subunit dehydrogenase [Camellia sinensis]		33.5122	46.9302	39.0061	38.2657	50.616	73.3637	35.691	29.0755	39.3978	51.2533	45.7305
EVM0011991	0.909634	salmon	PREDICTED: ETHYLENE INSENSITIVE 3-like 3 protein isoform X2 [Vitis vinifera]		34.142	33.4785	32.2769	34.3747	53.8128	43.0571	47.1099	44.8016	25.4514	21.1177	16.1567
EVM0000909	0.915454	salmon	hypothetical protein CFP56_23513 [Quercus suber]		53.0719	51.8826	17.0008	3.03506	149.128	137.114	32.3655	15.7872	0	0.0914657	0
EVM0016561	0.841394	salmon	hypothetical protein B456_011G137700 [Gossypium raimondii]		30.0092	30.9843	101.997	4.02672	296.447	221.642	81.6407	27.6459	4.21357	15.7938	1.72285
EVM0020557	0.562605	salmon	NAD(P)-linked oxidoreductase superfamily protein, putative [Theobroma cacao]		105.892	218.432	166.966	75.4774	296.941	293.493	159.084	110.105	256.994	111.583	47.6594
EVM0025257	0.654853	salmon	xylose isomerase [Jatropha curcas]		252.707	67.9221	89.0202	83.0763	127.471	58.9198	57.2522	46.2374	62.1397	57.4904	62.9391
EVM0007935	0.850658	salmon	cytochrome P450 CYP73A100-like [Prunus avium]		6.71498	22.9825	39.4946	9.20549	70.3221	62.2329	13.7595	7.12541	0	6.23761	0.439083
EVM0015585	0.890187	salmon	PREDICTED: protein MICRORCHIDIA 6 isoform X1 [Vitis vinifera]		10.4923	15.7413	13.0913	9.20563	23.3994	21.4243	20.4797	18.6376	8.11823	6.06358	8.13443
EVM0006257	0.947845	salmon	probable LRR receptor-like serine/threonine-protein kinase RFK1 isoform X1 [Quercus suber]		14.9196	12.9579	18.6019	10.4436	42.522	28.4891	30.5584	31.8973	8.7138	16.22	12.2552
EVM0019556	0.886465	salmon	SUMO-activating enzyme subunit 2 [Quercus suber]		36.2352	40.7006	33.1182	33.7597	76.4258	74.6747	81.7991	69.4449	26.2465	24.4613	27.6351
Liquidambar_formosana_newGene_5384	0.911159	salmon	#N/A		0	0.690878	0.261767	0.169279	2.90834	0.464514	0.638287	0.689493	0	0	0
EVM0017883	0.853773	salmon	PREDICTED: laccase-14 [Vitis vinifera]		49.368	6.69402	17.1629	5.8491	49.0458	12.6921	6.91564	2.68915	0	3.63525	0.0302877
EVM0008153	0.94595	salmon	PREDICTED: protein CREG1 [Vitis vinifera]		2.19484	2.91316	2.66976	1.08829	5.65862	5.43845	3.93965	4.16377	0.73917	1.341	0.726309
EVM0018031	0.838772	salmon	probable LRR receptor-like serine/threonine-protein kinase At1g53430 [Prunus persica]		10.9329	5.83359	6.66926	3.64134	103.779	67.7031	78.8697	86.982	41.5323	4.45559	8.34906
EVM0022798	0.900934	salmon	unnamed protein product [Coffea canephora]		13.3702	9.63157	12.3695	10.9468	20.1845	12.0363	13.5014	14.1742	4.79957	6.15583	5.19722
EVM0023680	0.791921	salmon	PREDICTED: peroxidase 5 [Vitis vinifera]		0.378523	0.744761	1.08502	0.390138	2.90934	2.29384	0.683487	0.709037	0.979364	0.746769	0.526427
Liquidambar_formosana_newGene_7196	0.877464	salmon	PREDICTED: uncharacterized protein LOC102626009 isoform X1 [Citrus sinensis]		2.16207	2.21818	1.33542	2.06276	3.70814	2.60328	2.74565	2.22168	0.233554	0.310961	0.885438
EVM0027365	0.922621	salmon	PREDICTED: serine/threonine-protein kinase ATG1c [Vitis vinifera]		47.528	50.5165	43.3481	52.941	78.5111	57.7244	68.8568	67.1467	20.5083	31.5573	33.5571
EVM0019657	0.93691	salmon	PREDICTED: purple acid phosphatase [Vitis vinifera]		50.3665	65.1363	46.2113	14.9436	172.017	132.78	68.9612	58.5532	9.91242	7.08524	10.4347
EVM0027887	0.65809	salmon	Scarecrow-like 3 [Castanea sativa]		42.8254	35.6266	75.2758	76.4108	74.1523	64.5663	71.9121	64.406	40.1044	67.2936	56.3046
EVM0027169	0.926399	salmon	PREDICTED: F-box protein PP2-B15-like [Juglans regia]		3.78336	0.263172	0.852525	0.236912	4.04564	3.76813	1.19391	0.483194	0.0384953	0.237362	0
Liquidambar_formosana_newGene_11766	0.867537	salmon	#N/A		0.342611	0.664604	0.259415	0.699546	1.28339	0.641925	1.30289	1.20022	0.0287983	0.048117	0.0162083
EVM0003665	0.488282	salmon	PREDICTED: 3-epi-6-deoxocathasterone 23-monooxygenase [Ziziphus jujuba]		0.976544	6.15174	4.06411	2.51414	9.32465	6.39384	7.26927	9.35598	8.57342	11.2287	9.16806
EVM0014943	0.798315	salmon	PREDICTED: small G protein signaling modulator 1 isoform X1 [Vitis vinifera]		12.1855	16.4642	13.5979	14.5514	17.7489	16.7212	10.8915	10.0897	5.38563	9.82844	6.37642
EVM0019340	0.93365	salmon	PREDICTED: long chain acyl-CoA synthetase 6, peroxisomal [Vitis vinifera]		23.2337	29.6561	47.0519	31.2705	78.6383	55.996	50.9313	49.9732	21.8821	26.6222	2.08874
EVM0000908	0.87991	salmon	Aldose_epim domain-containing protein [Cephalotus follicularis]		141.072	99.4453	94.724	40.7206	175.896	110.687	90.6285	81.4611	18.4383	13.5899	13.5837
EVM0016917	0.879285	salmon	PREDICTED: phytochrome A-associated F-box protein [Vitis vinifera]		15.7068	16.7615	22.1932	18.9252	40.3827	26.3827	36.9197	36.5542	12.6137	20.1951	22.885
EVM0014664	0.839034	salmon	fumarate hydratase 1, mitochondrial [Prunus persica]		40.0464	46.8267	38.6743	34.7795	79.0861	86.0364	53.8967	39.715	18.4551	38.2947	22.2284
EVM0014666	0.889604	salmon	PREDICTED: E3 ubiquitin-protein ligase PUB23-like [Nelumbo nucifera]		13.6548	2.37689	1.38583	0.240692	44.6263	13.4196	3.12978	2.61393	0.331528	0.303904	0.078679
EVM0014669	0.796751	salmon	PREDICTED: probable prolyl 4-hydroxylase 6 [Nelumbo nucifera]		49.3317	34.3528	21.572	20.7277	82.8649	42.5992	55.3504	55.1599	6.93715	31.6813	30.6569
EVM0028266	0.606603	salmon	actin-depolymerizing factor-like [Durio zibethinus]		55.5219	49.7513	50.441	39.3213	62.795	53.6716	48.8116	49.7222	53.4357	45.4379	42.9902
EVM0011857	0.716077	salmon	PREDICTED: mitochondrial uncoupling protein 1 [Ricinus communis]		72.3108	71.4877	45.7189	46.9435	86.0075	66.9639	51.5664	48.7255	20.8775	76.2788	31.5465
EVM0011856	0.848654	salmon	PREDICTED: putative UDP-sugar transporter DDB_G0278631 [Juglans regia]		26.0758	34.4392	29.1504	31.5293	40.4331	39.8961	26.2786	24.467	10.5937	21.269	9.66383
EVM0002131	0.877539	salmon	probable LRR receptor-like serine/threonine-protein kinase At1g74360 [Herrania umbratica]		4.35496	3.76692	9.09869	3.7949	14.4173	9.8249	7.04996	5.04616	2.32646	5.57056	3.61439
EVM0016185	0.889622	salmon	pyridoxal kinase isoform X2 [Quercus suber]		47.9536	61.2925	52.2361	39.8554	78.0102	75.6332	46.6822	47.2066	13.1509	37.2045	10.3183
EVM0013175	0.781032	salmon	PREDICTED: probable receptor-like protein kinase At1g11050 [Vitis vinifera]		6.85167	6.30604	16.8389	10.3666	15.6975	12.9555	12.7925	15.1605	6.97333	8.4025	6.54271
EVM0020890	0.78498	salmon	PREDICTED: kunitz trypsin inhibitor 2-like [Vitis vinifera]		702.43	86.4657	205.357	311.385	465.662	184.75	58.1995	32.789	0.147109	20.563	1.02155
EVM0025119	0.811692	salmon	PREDICTED: transmembrane protein 230 [Vitis vinifera]		85.3746	57.0221	71.234	62.8608	89.6376	76.7571	85.1059	86.3452	51.9131	76.6018	71.2496
EVM0025118	0.932518	salmon	PREDICTED: two-component response regulator ORR41 [Vitis vinifera]		1.03824	127.694	55.6327	77.4837	329.487	209.084	149.097	117.226	0.999076	1.82757	0.859279
EVM0022664	0.494184	salmon	uncharacterized protein LOC110809982 isoform X2 [Carica papaya]		3.10946	3.73648	2.59239	4.18632	3.86571	4.24529	3.10446	2.81531	4.33518	2.43425	2.50893
Liquidambar_formosana_newGene_14277	0.953096	salmon	hypothetical protein CFP56_06005 [Quercus suber]		2.9845	10.9984	0.437511	0	75.3011	65.1893	55.1862	41.5646	4.86663	1.18191	2.0582
EVM0000680	0.969336	salmon	PREDICTED: uncharacterized protein LOC108991946 isoform X1 [Juglans regia]		90.0111	79.5198	54.306	53.1186	215.295	136.267	142.673	124.689	22.3584	34.5423	56.9864
EVM0017277	0.876106	salmon	hypothetical protein CCACVL1_09693, partial [Corchorus capsularis]		12.6105	10.0065	20.6642	12.6596	23.9623	15.0727	13.3161	12.6175	8.02075	8.9837	4.8548
EVM0017274	0.814463	salmon	Phytosulfokine [Trema orientalis]		19.1066	11.0707	17.1337	6.50057	38.3807	37.6691	21.4315	24.0079	18.5042	18.4907	9.32848
EVM0011269	0.961057	salmon	sugar transport protein 13-like [Hevea brasiliensis]		16.7766	15.7415	19.1903	2.73766	219.144	131.101	111.442	98.0559	32.0708	18.6307	30.0479
EVM0012988	0.924294	salmon	cysteine-rich repeat secretory protein 38-like [Prunus avium]		28.9581	1.6456	1.91619	0.962334	27.8662	11.4904	5.23434	4.9778	0	0.649899	0.0425837
EVM0012986	0.85318	salmon	PREDICTED: uncharacterized protein LOC104606390 isoform X2 [Nelumbo nucifera]		1.67293	7.56963	5.15282	3.41853	28.691	17.4419	19.8081	19.8899	8.79159	3.26094	11.3879
EVM0023875	0.896691	salmon	RecName: Full=3-hydroxy-3-methylglutaryl-coenzyme A reductase; Short=HMG-CoA reductase		690.166	1085.47	1530.9	893.939	2001.26	1756.44	1398.45	1141.31	709.77	581.734	561.351
EVM0008977	0.919125	salmon	PREDICTED: calcium/calmodulin-regulated receptor-like kinase 1 [Nelumbo nucifera]		0.387669	5.48	0.987226	1.84238	12.8763	5.54901	12.3181	11.2065	0	0	0.0118683
Liquidambar_formosana_newGene_4030	0.872728	salmon	#N/A		0.447165	0.731379	0.311332	0.518818	1.44451	1.78472	1.20651	0.7905	0.291546	0.213155	0.361025
EVM0004237	0.830963	salmon	PREDICTED: electron transfer flavoprotein subunit beta, mitochondrial [Vitis vinifera]		20.4941	25.3665	21.6331	15.7436	31.6644	33.0732	28.6402	27.7178	24.0539	17.986	17.101
EVM0003610	0.795615	salmon	PREDICTED: transcription factor PRE6-like [Ziziphus jujuba]		18.8059	28.5761	5.49881	19.3381	59.3716	55.2639	78.7522	54.094	0.354613	0.982302	0.288547
Liquidambar_formosana_newGene_1873	0.753384	salmon	#N/A		5.77052	7.59276	2.87159	2.90668	14.8565	4.9842	2.19643	0.734237	0.0349763	0.724416	0
EVM0027583	0.91789	salmon	multicopper oxidase LPR1 homolog 1-like [Hevea brasiliensis]		33.6109	14.7458	0.555448	7.54011	127.912	114.826	83.7232	101.935	2.91663	6.26968	0.636823
EVM0021181	0.932554	salmon	hypothetical protein CDL15_Pgr016681 [Punica granatum]		10.4367	7.65306	9.19705	0.942433	137.189	130.753	51.9896	38.4421	21.9332	2.26869	4.12035
EVM0007944	0.930355	salmon	PREDICTED: zinc finger protein BRUTUS [Vitis vinifera]		25.3553	19.4474	25.0917	20.1904	46.171	21.0722	20.5111	26.8981	11.4518	10.8613	13.1446
EVM0007946	0.904932	salmon	hypothetical protein BVC80_9089g96 [Macleaya cordata]		1.49553	7.68702	16.8062	11.8622	73.9324	30.6877	11.4944	6.26638	0	4.19598	0.24011
EVM0008716	0.874884	salmon	plastid acyl-ACP thioesterase [Vernicia fordii]		72.6765	107.291	79.5416	119.717	200.962	95.4033	100.935	91.6073	34.6984	58.5169	53.7375
EVM0027289	0.928461	salmon	hypothetical protein JCGZ_21346 [Jatropha curcas]		157.746	179.665	45.4595	57.7877	360.35	255.182	205.095	193.345	8.86861	31.3202	24.8581
EVM0010605	0.919619	salmon	PREDICTED: NADPH--cytochrome P450 reductase [Vitis vinifera]		197.755	201.505	189.287	197.501	358.478	331.147	286.787	277.02	152.618	212.168	134.1
EVM0009678	0.948229	salmon	PREDICTED: major allergen Pru ar 1 [Eucalyptus grandis]		13.6461	18.429	24.7886	3.99079	123.368	120.858	37.1531	31.622	13.7599	5.84609	9.56552
EVM0022741	0.946154	salmon	hypothetical protein BC332_00906 [Capsicum chinense]		15.3405	12.7139	16.9432	14.0266	33.448	20.4446	23.1015	21.5839	6.35998	8.26111	7.69685
EVM0015513	0.84201	salmon	PREDICTED: protein FAR-RED ELONGATED HYPOCOTYL 3 [Vitis vinifera]		22.591	21.6407	22.8175	28.0077	31.6414	29.0822	29.5237	35.0513	25.0107	20.592	22.1122
Liquidambar_formosana_newGene_11671	0.921086	salmon	#N/A		0.15788	2.09902	0.750073	0.0218397	4.19473	1.96853	0.802815	0.438718	0	0	0
EVM0013564	0.897678	salmon	cellulose synthase-like protein D4 [Morus notabilis]		0.139147	1.70817	1.05642	0.815748	7.17963	1.74698	1.26161	0.827368	0.0106763	0.545267	0.0224627
EVM0009471	0.891622	salmon	unnamed protein product, partial [Vitis vinifera]		34.8256	44.7999	30.4353	30.2711	77.6652	68.3903	76.4795	71.1673	30.4778	29.3095	30.7264
EVM0007521	0.8585	salmon	PREDICTED: uncharacterized protein LOC100264608 [Vitis vinifera]		163.054	178.092	104.493	73.1882	433.662	407.31	436.558	346.372	56.0329	27.6779	74.4306
EVM0015309	0.926146	salmon	hypothetical protein Ccrd_000027 [Cynara cardunculus var. scolymus]		17.1443	15.0024	34.4761	18.8803	53.7068	37.8272	29.1672	23.5404	16.8698	13.0036	1.86264
EVM0006596	0.624939	salmon	MatE domain-containing protein [Cephalotus follicularis]		0.753842	4.14512	0.703429	5.57164	6.62614	2.2505	3.69735	5.12343	0.79049	6.83908	0.537719
EVM0026801	0.955255	salmon	PREDICTED: ankyrin repeat-containing protein At5g02620 [Vitis vinifera]		3.6119	4.88821	8.53738	8.84444	30.1457	26.7882	12.3312	13.4494	1.25178	6.15383	5.91682
EVM0017074	0.701108	salmon	PREDICTED: ATP phosphoribosyltransferase 2, chloroplastic [Vitis vinifera]		38.7556	28.2023	22.7766	16.1721	34.571	45.2236	29.1774	24.2946	25.8678	25.2599	22.0147
EVM0014232	0.729307	salmon	hypothetical protein CISIN_1g047728mg [Citrus sinensis]		0.657337	0.440281	1.31982	0.458693	2.77259	2.23264	1.07332	0.743214	0.0757877	1.61057	0.30107
EVM0008187	0.885602	salmon	PREDICTED: alcohol dehydrogenase 1 [Vitis vinifera]		87.738	23.9848	16.2081	10.0793	382.875	46.3357	90.1455	119.506	0.112403	101.578	1.13128
EVM0005729	0.866434	salmon	Endoplasmic reticulum vesicle transporter, C-terminal [Trema orientalis]		38.493	46.1174	39.943	42.9019	56.1547	52.4327	52.0376	49.7844	26.5465	34.2451	32.4689
EVM0027745	0.915457	salmon	phytosulfokine receptor 2 [Durio zibethinus]		9.53589	10.4536	14.3403	11.5867	21.1755	21.4281	13.8405	12.4122	2.38414	2.99386	2.99018
EVM0014910	0.946492	salmon	PREDICTED: uncharacterized protein LOC107434202 [Ziziphus jujuba]		4.60455	5.58647	7.36468	5.3925	13.0061	9.88397	8.21244	6.58926	0.704926	4.39689	1.32985
EVM0023678	0.861374	salmon	UDP-glycosyltransferase 74AG1 [Camellia sinensis]		1.31079	1.83347	1.91205	1.37259	6.17486	2.57494	2.92807	2.77239	0.762823	2.12115	1.20072
EVM0018880	0.527474	salmon	PREDICTED: chitinase 10 [Ricinus communis]		0.359083	0.20163	1.07774	0.0791207	2.58359	0.90704	0.470886	0.240027	0.682406	2.85453	1.12787
EVM0000096	0.885942	salmon	PREDICTED: probable LRR receptor-like serine/threonine-protein kinase RFK1 isoform X1 [Vitis vinifera]		2.11815	4.13529	6.31118	3.25623	9.52993	5.98317	4.56636	5.43751	3.86861	1.79664	3.45077
EVM0017952	0.90905	salmon	PREDICTED: umecyanin [Theobroma cacao]		37.1131	105.282	147.336	31.6367	316.276	349.29	98.9638	86.811	3.30519	20.1749	4.15953
EVM0014793	0.767628	salmon	PREDICTED: uncharacterized protein LOC101306871 isoform X1 [Fragaria vesca subsp. vesca]		0.287512	1.52636	7.71687	1.04974	14.5293	5.46264	3.60796	2.04662	3.26963	2.70052	6.21591
EVM0014795	0.821221	salmon	calmodulin-binding transcription activator 4 [Quercus suber]		24.8858	21.3837	17.0874	25.482	32.455	21.9383	33.351	35.8778	17.4981	19.9799	22.0674
EVM0005885	0.803013	salmon	Major facilitator superfamily protein isoform 1 [Theobroma cacao]		9.96847	13.7637	22.8751	7.50735	46.0182	38.9958	32.8734	31.5676	16.4563	31.6607	12.6954
EVM0006610	0.921428	salmon	PREDICTED: pectinesterase 2 [Vitis vinifera]		114.831	9.60094	8.05897	18.0547	58.7086	21.8656	14.0749	13.183	0.027911	0.471426	0.078291
Liquidambar_formosana_newGene_10346	0.874752	salmon	#N/A		3.59218	6.32153	5.32378	7.24728	10.3906	7.42456	8.57276	7.53775	1.11163	2.15245	2.65861
EVM0028828	0.799476	salmon	hypothetical protein CISIN_1g002489mg [Citrus sinensis]		23.5723	22.4848	24.7875	23.5476	40.4966	36.0758	33.7329	34.7763	24.5607	23.5074	35.9887
EVM0007439	0.900531	salmon	hypothetical protein PRUPE_8G090300 [Prunus persica]		16.2866	9.24011	12.7224	6.63991	24.2552	18.3907	13.2327	11.3818	1.95671	2.87853	5.96812
EVM0005583	0.852156	salmon	PREDICTED: protein LURP-one-related 10-like [Gossypium hirsutum]		83.6718	36.9726	32.7568	26.3963	78.2632	57.0486	47.8232	52.3914	17.8703	38.9492	10.8827
EVM0019163	0.908764	salmon	zinc finger family protein [Populus trichocarpa]		214.713	46.6647	49.1813	49.5835	290.302	84.9457	123.125	128.451	15.6978	18.4721	26.1665
Liquidambar_formosana_newGene_10773	0.764755	salmon	uncharacterized protein LOC110653750 [Hevea brasiliensis]		0.598261	0.361498	0.329802	1.00146	2.9416	0.827611	1.1566	1.30514	1.36015	0.288498	0.94849
EVM0008068	0.835471	salmon	thiamine pyrophosphokinase 1 isoform X1 [Jatropha curcas]		9.26375	6.63213	9.60186	7.37023	12.6781	11.6515	8.40245	6.68912	4.18524	7.78374	4.14593
EVM0002606	0.864794	salmon	PREDICTED: uncharacterized protein LOC105107522 [Populus euphratica]		0.442655	0.381005	0.594331	0.603434	3.75272	2.1978	1.98724	1.78218	1.54318	0.226556	0.523981
EVM0006518	0.936216	salmon	PREDICTED: histidinol-phosphate aminotransferase, chloroplastic-like [Juglans regia]		39.4082	41.4277	23.0595	21.4573	75.2208	70.2814	56.4881	44.3917	12.9908	21.8351	16.4856
EVM0005372	0.658599	salmon	PREDICTED: uncharacterized protein LOC104880698 [Vitis vinifera]		14.545	16.805	10.1154	10.8042	15.3634	18.0846	16.4048	12.9365	13.3284	8.05461	7.60397
EVM0016967	0.731226	salmon	PREDICTED: MACPF domain-containing protein NSL1 [Vitis vinifera]		13.1015	22.8805	34.6149	14.2632	33.4301	26.4723	30.3956	31.1264	30.4881	13.693	9.2747
EVM0010703	0.823217	salmon	Oligopeptide transporter 3 [Capsicum chinense]		2.507	2.37337	1.27344	2.97004	5.8236	11.358	3.31314	3.727	2.95237	1.20094	1.58236
EVM0000838	0.943625	salmon	--		2.34342	4.45024	4.81135	1.92079	11.0528	12.5045	6.46567	5.72838	0.73	0.275036	0.920875
EVM0015102	0.956232	salmon	uncharacterized protein LOC110621882 [Manihot esculenta]		24.3835	17.4874	21.8765	2.95097	52.241	30.2522	25.7726	19.4906	2.65575	11.2707	5.01417
EVM0009503	0.921903	salmon	putative 12-oxophytodienoate reductase 11 [Citrus clementina]		11.1187	45.1215	18.6037	23.2923	102.168	97.0074	49.7096	30.8093	3.4508	42.7701	4.4464
EVM0003764	0.913987	salmon	PREDICTED: probable galactinol--sucrose galactosyltransferase 2 [Theobroma cacao]		37.3026	41.4215	64.9282	56.5685	155.427	40.7071	45.9989	55.317	1.18644	21.5629	3.76252
EVM0007078	0.851938	salmon	ribonucleoside-diphosphate reductase large subunit [Hevea brasiliensis]		2.20514	4.25284	3.93295	2.61938	5.73876	4.06192	3.23094	2.45256	1.05518	0.583203	1.09973
EVM0024502	0.933041	salmon	uncharacterized protein LOC110647656 [Hevea brasiliensis]		301.783	171.652	40.6984	1.29585	558.264	235.8	292.401	363.305	0.189694	60.4848	9.8036
EVM0016381	0.822318	salmon	PREDICTED: regulator of nonsense transcripts UPF2 isoform X2 [Vitis vinifera]		23.2099	27.3972	23.1521	23.067	33.2893	31.6081	28.8412	28.5258	15.5227	13.5627	17.5807
EVM0013351	0.643825	salmon	unnamed protein product, partial [Vitis vinifera]		2.32802	1.11688	0.885607	2.06662	4.18045	0.73053	0.496067	0.597518	0.0222627	3.22603	0.020497
EVM0008555	0.853162	salmon	Protein of unknown function DUF1442 [Macleaya cordata]		4.65779	0.538722	2.11223	1.11918	12.299	1.42043	1.41245	0.786108	0.027276	0.532216	0.0471873
EVM0002597	0.948577	salmon	BON1-associated protein 2-like [Quercus suber]		1.83959	1.00905	1.85063	0	5.1578	3.01021	1.99285	1.54175	0.112626	0.253376	0.0524527
EVM0002592	0.959121	salmon	PREDICTED: homeobox-leucine zipper protein HOX11 isoform X2 [Nelumbo nucifera]		8.24086	68.4009	51.0656	27.9384	134.945	89.9781	70.7856	37.1822	5.93657	19.5557	17.4589
EVM0011667	0.81731	salmon	receptor-like serine/threonine-protein kinase SD1-6 [Quercus suber]		3.70713	8.88926	9.70704	13.4558	17.7134	12.9009	10.5241	9.4047	0.122193	2.67106	0.484186
EVM0020209	0.839582	salmon	hypothetical protein CCACVL1_20141 [Corchorus capsularis]		9.18408	8.41132	8.52858	10.2975	12.1874	11.9425	12.5925	11.9432	6.33748	6.48242	6.04036
EVM0028435	0.849454	salmon	PREDICTED: ethylene-responsive transcription factor ERF071 [Ziziphus jujuba]		259.5	422.83	142.877	132.528	882.73	653.604	939.671	853.66	177.994	283.282	339.474
EVM0000419	0.770464	salmon	cationic amino acid transporter 2, vacuolar-like isoform X1 [Durio zibethinus]		67.8966	147.001	76.4135	197.894	188.443	123.42	116.874	140.328	38.0595	77.2331	62.8741
EVM0028571	0.862031	salmon	PREDICTED: exonuclease mut-7 homolog isoform X1 [Juglans regia]		37.9112	36.1371	20.1677	36.1907	66.4921	40.6114	53.9471	47.168	26.9498	36.7003	31.8677
EVM0028627	0.959781	salmon	PREDICTED: long chain acyl-CoA synthetase 6, peroxisomal [Vitis vinifera]		30.3348	38.9138	36.9769	27.5244	119.192	78.5625	87.2848	83.1448	19.9279	29.6893	6.95821
EVM0002319	0.927315	salmon	PREDICTED: 5&apos; exonuclease Apollo [Vitis vinifera]		1.02045	1.86922	1.46118	0.842274	5.15998	2.42791	2.27681	1.75009	1.98249	0.605724	0.523946
EVM0011906	0.900183	salmon	PREDICTED: F-box protein PP2-A13 [Vitis vinifera]		29.5089	32.8499	30.9794	23.0178	83.4661	64.9763	66.8406	56.3364	14.3334	16.4353	22.8081
EVM0002281	0.91466	salmon	PREDICTED: pectinesterase 2 [Vitis vinifera]		20.7008	1.19648	0.497808	1.02155	7.83634	3.37825	2.03816	1.54705	0	0.426482	0
EVM0004628	0.511042	salmon	PREDICTED: adenine phosphoribosyltransferase 1-like [Ziziphus jujuba]		103.719	97.2417	86.0002	76.7701	125.32	150.158	109.572	107.652	104.167	131.576	112.205
EVM0022095	0.763557	salmon	uncharacterized protein At2g29880-like [Prunus avium]		0.462891	0.65656	1.1073	0.885566	1.51768	1.22932	1.79015	1.07123	0.739836	0.475975	0.826723
EVM0000022	0.482618	salmon	Oxoglutarate/iron-dependent dioxygenase [Parasponia andersonii]		13.8279	5.13989	12.1427	6.12176	14.9594	6.50448	3.182	2.66103	4.87972	17.0892	2.73172
EVM0009423	0.90509	salmon	UDP-glucuronosyltransferase, putative isoform 1 [Theobroma cacao]		4.43783	6.92815	8.11739	13.6708	51.5697	44.0153	18.0744	10.9517	1.0986	1.35606	0.147282
EVM0009427	0.875318	salmon	PREDICTED: cellulose synthase-like protein D1 [Eucalyptus grandis]		0.107997	0.282541	0.588846	0.185664	0.903991	0.496648	0.268578	0.109607	0.0590257	0.0305767	0.0100713
EVM0024620	0.844395	salmon	PREDICTED: lysine-specific demethylase JMJ18 isoform X1 [Vitis vinifera]		11.6045	15.0173	21.8303	18.677	31.1187	21.9665	20.3242	23.2877	18.9805	19.7274	16.0723
EVM0028704	0.890833	salmon	PREDICTED: probable mannitol dehydrogenase [Juglans regia]		0.465362	1.38109	2.3964	1.25339	4.72009	3.2898	1.44921	0.884775	0.147482	0.829755	0.1688
EVM0010976	0.7496	salmon	PREDICTED: beta-1,3-galactosyltransferase 7 [Nelumbo nucifera]		17.6252	21.0111	33.0316	16.9278	42.353	51.0935	31.566	30.52	30.9164	22.2075	20.7842
EVM0018543	0.847254	salmon	beta-glucosidase 1 GH1 family [Camellia sinensis]		26.2153	72.1649	83.4954	30.9212	140.193	139.019	75.6532	35.1447	0.554641	22.3937	2.21979
EVM0019630	0.515969	salmon	Isocitrate dehydrogenase NAD-dependent [Trema orientalis]		58.3067	64.186	58.9324	39.443	95.9683	84.1698	81.4055	67.4996	79.9324	86.195	82.5903
EVM0019632	0.6507	salmon	PREDICTED: phosphatidylinositol/phosphatidylcholine transfer protein SFH8 [Vitis vinifera]		4.28383	10.8856	12.9793	8.49207	14.016	8.52032	10.2359	10.9911	3.27403	12.787	9.12527
EVM0017648	0.848731	salmon	XIAP-associated factor 1-like [Durio zibethinus]		55.8457	72.2776	49.628	51.4352	79.0566	73.2862	78.3759	74.8435	31.311	40.6865	36.0438
EVM0000495	0.91187	salmon	nedd8-conjugating enzyme ubc12 [Quercus suber]		38.6415	39.2258	17.9136	25.2898	58.1914	39.7766	43.6915	38.9318	16.2682	32.9026	13.6477
EVM0004496	0.837516	salmon	unnamed protein product, partial [Vitis vinifera]		15.0815	52.9787	19.8364	3.6866	78.4752	30.2511	61.6945	50.4049	1.20449	15.6175	14.8741
EVM0016756	0.737471	salmon	hypothetical protein POPTR_017G115900v3 [Populus trichocarpa]		0.676404	0.729244	1.0802	0.252398	2.66522	1.59025	1.2493	0.750336	0.386408	0.59365	1.39567
EVM0011706	0.95425	salmon	probable carboxylesterase 2 [Quercus suber]		6.08986	21.4703	17.7456	15.4102	72.6165	40.8307	21.7916	16.5767	4.62074	4.86339	3.75757
EVM0021053	0.87915	salmon	Diaminopimelate epimerase, DapF [Corchorus olitorius]		67.2178	80.5938	52.187	50.5764	97.9554	114.212	76.9773	79.1533	40.0717	65.7814	45.74
EVM0022839	0.882456	salmon	unnamed protein product, partial [Vitis vinifera]		22.6382	31.7969	24.0123	43.0743	58.6309	41.2842	47.6327	49.133	28.7637	26.1107	28.8056
EVM0005825	0.943577	salmon	B3 domain-containing protein Os01g0234100-like isoform X1 [Hevea brasiliensis]		17.2014	24.906	25.2223	24.975	43.7005	40.0997	31.4009	33.7012	19.1088	14.8331	14.5336
EVM0000751	0.773571	salmon	PREDICTED: protein kinase 2B, chloroplastic-like [Nelumbo nucifera]		19.2124	26.5115	18.6589	31.6749	37.6236	24.0599	21.3928	20.3796	15.276	14.6292	14.5638
EVM0026173	0.850389	salmon	PREDICTED: RING-H2 finger protein ATL2-like [Nelumbo nucifera]		41.4228	11.1807	1.72039	0.572446	47.9873	39.4153	39.7287	38.5634	0.561389	3.0575	4.12103
EVM0005547	0.89637	salmon	Myotubularin family [Parasponia andersonii]		23.7475	21.8062	19.1152	24.4469	34.8801	28.7978	31.6974	31.6414	16.4861	16.4137	13.414
EVM0017316	0.953724	salmon	PREDICTED: calcium-dependent protein kinase 2-like [Nelumbo nucifera]		48.8789	36.409	37.1016	36.1395	80.511	59.5762	62.5938	66.5888	12.893	19.7299	18.8571
EVM0018793	0.843568	salmon	beta-glucosidase 13-like isoform X1 [Quercus suber]		8.18807	13.6488	12.4709	6.05632	57.8702	14.4911	4.18228	3.36937	4.92939	1.51603	1.15727
EVM0020777	0.879464	salmon	PREDICTED: cysteine proteinase inhibitor 5 [Juglans regia]		111.676	51.2469	41.4264	31.928	150.539	87.4161	128.574	133.299	19.2126	18.0286	37.2805
EVM0011325	0.754921	salmon	transcription factor MYB108-like [Durio zibethinus]		39.5236	27.4284	37.2484	13.6167	123.122	104.467	78.0635	40.3576	4.7332	106.711	18.354
Liquidambar_formosana_newGene_14085	0.770345	salmon	#N/A		10.4327	0.891132	0.100167	0.018703	7.59446	1.76028	2.86605	2.17679	0.167935	0	0.118085
EVM0002652	0.906446	salmon	unnamed protein product, partial [Vitis vinifera]		42.4719	17.0399	10.4956	5.1135	57.5685	76.4916	16.9682	6.76707	0.323736	4.00647	0.197953
EVM0027102	0.945895	salmon	PREDICTED: glu S.griseus protease inhibitor [Theobroma cacao]		12.1894	2.11572	1.29201	0.112309	176.424	159.442	48.3903	20.8768	0	0.499029	0
EVM0014859	0.808806	salmon	uncharacterized protein LOC112001736 [Quercus suber]		0.117618	4.22077	2.11158	6.58374	18.7939	3.74631	1.7011	0.928674	0	3.00432	0.0819467
EVM0015334	0.932945	salmon	Isopentenyl-diphosphate delta-isomerase, type [Parasponia andersonii]		229.994	303.114	197.646	176.84	501.564	568.5	310.645	260.11	155.485	155.984	104.143
EVM0016014	0.935906	salmon	stigma-specific STIG1-like protein 1 [Herrania umbratica]		0	0.103731	0.285075	0.020147	6.60789	3.54756	1.39186	0.536477	0	0.687117	0.0107577
EVM0019772	0.924703	salmon	uncharacterized protein LOC112022319 [Quercus suber]		228.735	74.9391	110.259	10.1901	239.666	151.702	57.1347	46.6904	13.4857	8.80789	1.51878
EVM0023955	0.92403	salmon	membrane steroid-binding protein 2-like [Sesamum indicum]		49.6361	67.0637	47.8268	48.1472	109.912	120.437	81.3927	68.1768	28.7	59.336	36.4453
EVM0000597	0.899358	salmon	uncharacterized protein LOC110925475 [Helianthus annuus]		0.0553057	0.221988	0.170576	0.0145253	1.88079	0.540943	1.15347	1.69474	0	0.0485043	0.0331547
EVM0015134	0.906354	salmon	cationic peroxidase 2-like [Quercus suber]		10.5415	12.5519	73.296	17.0392	383.902	157.345	54.8169	37.6926	6.05138	3.2405	2.14407
EVM0003733	0.891926	salmon	#N/A		13.1683	21.104	13.1105	23.0749	30.318	20.8953	22.9275	20.7377	3.33932	7.36405	5.20784
EVM0027718	0.923512	salmon	probable disease resistance protein At1g12280 [Helianthus annuus]		4.7197	3.23694	4.69256	4.91378	8.66259	6.47597	4.70173	5.62927	1.64989	1.46134	2.54747
EVM0023628	0.819626	salmon	probable prolyl 4-hydroxylase 3 [Quercus suber]		89.9939	64.8612	54.7528	30.8563	187.831	100.129	113.734	99.376	11.0961	56.3265	46.1115
EVM0020193	0.898251	salmon	unnamed protein product, partial [Vitis vinifera]		184.341	122.462	108.231	122.539	216.238	207.144	211.949	195.679	54.7315	56.7557	75.1135
EVM0008589	0.591992	salmon	isocitrate dehydrogenase [NAD] catalytic subunit 5, mitochondrial [Morus notabilis]		93.5104	95.3102	84.4134	68.3246	119.741	119.64	111.176	95.9141	95.6498	109.685	106.158
EVM0028875	0.684866	salmon	Miro domain-containing protein [Cephalotus follicularis]		8.12552	3.30555	1.38749	0.154622	9.19774	7.9973	7.77218	5.08013	8.32244	1.08176	1.15146
Liquidambar_formosana_newGene_10910	0.642931	salmon	#N/A		4.02278	8.27469	4.72344	7.46088	7.57955	7.3933	6.9347	6.54648	5.15601	6.85494	5.47488
EVM0017396	0.80454	salmon	RPM1-interacting protein 4-like [Quercus suber]		81.8065	95.1851	103.904	72.984	234.298	203.89	218.468	195.722	133.235	179.74	123.326
EVM0015829	0.831657	salmon	hypothetical protein CCACVL1_26250 [Corchorus capsularis]		9.02881	4.02398	4.65715	4.3849	11.1376	7.62549	8.73349	6.7718	0.419895	3.97288	3.51614
EVM0028406	0.958197	salmon	uncharacterized protein LOC111313609 isoform X1 [Durio zibethinus]		54.2542	99.6874	19.1553	1.37628	147.047	90.9881	87.932	65.7437	0.907865	9.02517	0.210267
EVM0005301	0.91925	salmon	PREDICTED: phytosulfokine receptor 1 [Pyrus x bretschneideri]		9.18811	13.7202	19.6786	13.674	35.3417	24.1797	18.6024	13.8383	10.1079	5.12298	3.21836
EVM0016508	0.863767	salmon	LOW QUALITY PROTEIN: vinorine synthase-like [Herrania umbratica]		5.07376	18.2118	17.5194	20.5861	37.8086	22.0307	9.89388	6.39123	0.345003	0.690449	0.441644
EVM0009026	0.908042	salmon	PREDICTED: glucose-6-phosphate 1-dehydrogenase, cytoplasmic isoform [Citrus sinensis]		59.509	98.5013	83.7091	64.8342	188.224	201.076	125.057	117.468	24.5596	90.291	40.303
EVM0004429	0.813677	salmon	hypothetical protein CDL15_Pgr028503 [Punica granatum]		314.589	485.784	360.38	484.03	1157.97	527.462	325.031	252.963	239.544	269.221	283.306
EVM0023798	0.597843	salmon	thaumatin-like protein [Vitis cinerea var. helleri x Vitis riparia]		631.448	25.3425	14.6351	14.2444	173.634	214.615	114.389	92.0829	44.1236	113.908	34.155
EVM0009555	0.971336	salmon	stem-specific protein TSJT1-like [Hevea brasiliensis]		879.328	444.345	645.696	236.401	2090.85	804.051	705.431	690.862	32.7758	16.0785	10.6307
EVM0029324	0.850573	salmon	hypothetical protein POPTR_0008s13370g [Populus trichocarpa]		4.07478	16.7545	44.3288	8.34656	70.8958	65.7722	52.3687	38.8673	22.4766	17.0302	22.5953
EVM0018377	0.929403	salmon	PREDICTED: dihydrolipoyllysine-residue acetyltransferase component 2 of pyruvate dehydrogenase complex, mitochondrial-like [Juglans regia]		54.5337	70.4874	52.0716	48.7034	94.2823	114.633	67.6005	62.6847	23.786	47.9953	33.3014
EVM0028812	0.836894	salmon	PREDICTED: uncharacterized protein LOC104880184 isoform X1 [Vitis vinifera]		0.46305	7.9912	7.64135	3.50037	17.8824	15.3084	6.32773	5.1584	2.51719	1.18726	1.47899
Liquidambar_formosana_newGene_1855	0.889357	salmon	hypothetical protein CISIN_1g021771mg [Citrus sinensis]		5.10125	9.06264	10.2709	8.05343	13.4911	12.8092	10.4294	10.8056	4.94846	3.31022	4.6437
EVM0015205	0.834202	salmon	PREDICTED: glu S.griseus protease inhibitor-like [Juglans regia]		93.6082	1.381	8.7541	3.15897	28.4983	10.6235	2.12106	1.04478	0	0.0586937	0
EVM0018514	0.823016	salmon	PREDICTED: cationic amino acid transporter 1 [Citrus sinensis]		0.059147	0.083408	0.928207	0.117769	4.46199	4.15471	0.349376	3.96292	0.0248893	0.44123	0.932942
EVM0027400	0.962159	salmon	PREDICTED: cytochrome P450 714C2-like [Juglans regia]		64.2475	84.5425	63.7847	12.7535	222.42	230.936	127.355	93.5058	3.75663	21.6854	6.09875
EVM0014313	0.901815	salmon	PREDICTED: 1-aminocyclopropane-1-carboxylate oxidase homolog 1 [Vitis vinifera]		31.3466	30.3992	18.1974	21.2796	44.0477	32.7546	30.7521	27.635	5.98631	6.17805	1.62104
EVM0013732	0.903312	salmon	PREDICTED: serine/threonine-protein kinase AtPK2/AtPK19-like [Juglans regia]		111.984	95.8015	120.224	81.5134	179.69	182.951	149.212	150.016	40.2116	39.9477	31.8925
EVM0028051	0.919295	salmon	hypothetical protein PRUPE_1G146600 [Prunus persica]		189.683	92.2997	36.1546	16.4151	801.843	289.899	591.353	702.279	22.7308	8.71907	5.80597
EVM0017402	0.933541	salmon	4-hydroxyphenylpyruvate dioxygenase [Cucurbita maxima]		454.865	168.811	254.226	207.5	596.095	290.089	226.618	172.819	133.215	120.194	51.3252
EVM0021595	0.797598	salmon	hypothetical protein CCACVL1_25695 [Corchorus capsularis]		45.9187	29.698	18.1516	58.6137	62.0843	72.4669	68.8721	60.4135	16.8736	31.5119	19.3067
Liquidambar_formosana_newGene_6257	0.745969	salmon	unnamed protein product, partial [Vitis vinifera]		4.1432	6.2507	12.5929	7.92757	13.1697	12.3151	12.1779	12.7246	6.64267	8.59605	8.55066
EVM0005013	0.926172	salmon	PREDICTED: glu S.griseus protease inhibitor [Theobroma cacao]		22.0964	7.78017	2.34085	1.10311	387.541	344.636	97.749	41.4726	0	0	0.265354
EVM0005018	0.907123	salmon	protein DOWNY MILDEW RESISTANCE 6-like [Manihot esculenta]		1.66285	2.57342	2.41625	1.78358	9.87712	3.96574	3.87167	1.76116	0.0334873	3.28034	0.255646
EVM0011054	0.982649	salmon	PREDICTED: squalene monooxygenase [Vitis vinifera]		155.812	182.646	151.643	93.7792	604.185	479.705	280.478	190.383	5.16648	50.0275	8.69551
EVM0002069	0.920582	salmon	PREDICTED: uncharacterized aarF domain-containing protein kinase 1 [Vitis vinifera]		3.2933	4.33362	1.99419	3.03517	8.19237	7.84652	6.01227	4.79984	1.39147	2.80244	2.93292
EVM0019642	0.868375	salmon	PREDICTED: DNA repair protein RAD16 [Vitis vinifera]		60.6843	62.7089	53.3063	35.6598	98.5923	102.358	92.2328	81.9067	26.6746	39.5701	45.0546
EVM0019644	0.630931	salmon	5-amino-6-(5-phospho-D-ribitylamino)uracil phosphatase, chloroplastic [Quercus suber]		19.4133	23.1298	17.0857	17.8136	43.6409	33.5765	38.1567	36.7541	56.6017	20.3953	22.628
EVM0013024	0.549216	salmon	mechanosensitive ion channel protein 10-like [Herrania umbratica]		6.90595	11.3931	17.4823	7.66525	31.4084	34.6508	24.934	22.377	37.1351	22.8061	13.6565
Liquidambar_formosana_newGene_5155	0.834707	salmon	PREDICTED: protein EXECUTER 1, chloroplastic [Nelumbo nucifera]		10.8255	18.1887	11.6359	10.814	28.0523	26.7582	29.3505	25.8897	13.7469	9.72983	11.9077
EVM0027484	0.605821	salmon	PREDICTED: major allergen Pru ar 1 [Eucalyptus grandis]		172.309	361.834	367.45	115.804	555.273	624.818	316.556	239.287	514.048	251.262	153.533
EVM0003373	0.84323	salmon	uncharacterized protein LOC110618794 [Manihot esculenta]		44.4631	48.1503	55.9232	56.3801	133.054	130.223	73.4885	58.43	21.8293	43.0141	15.4323
EVM0003276	0.695366	salmon	PREDICTED: cysteine-rich receptor-like protein kinase 10 [Theobroma cacao]		0.0975763	5.34695	2.60426	1.9947	8.44729	3.59948	2.83246	4.0258	5.40471	0.866982	1.21794
EVM0018416	0.862182	salmon	hypothetical protein CARUB_v10027593mg [Capsella rubella]		6.27205	6.81906	3.38582	3.41899	27.1928	12.5348	17.5632	15.3409	0.286623	1.59225	1.07339
EVM0000899	0.553574	salmon	PREDICTED: basic 7S globulin-like [Juglans regia]		1.47248	2.66813	1.92308	1.79032	6.13001	5.8416	1.45395	1.35777	6.77087	1.46897	1.21397
EVM0000898	0.894484	salmon	hypothetical protein TorRG33x02_016340 [Trema orientalis]		33.9322	30.4118	2.61157	0.276676	170.273	80.0951	103.006	117.67	0.055637	19.5249	24.4713
Liquidambar_formosana_newGene_9698	0.800831	salmon	#N/A		0.034282	0.061917	0.253684	0.200447	0.593732	0.664754	0.220097	0.446127	0	0	0.248179
EVM0001413	0.95595	salmon	PREDICTED: putative receptor protein kinase ZmPK1 [Vitis vinifera]		4.52456	9.82689	8.50584	4.98646	21.5783	12.0878	7.74876	7.04213	1.09994	1.26986	1.85462
EVM0013470	0.845865	salmon	aspartic proteinase-like protein 2 [Citrus clementina]		21.615	21.364	25.8418	31.3769	58.1463	27.4208	36.0704	47.7363	6.21243	15.0372	12.232
EVM0013476	0.874217	salmon	citrate synthase [Paeonia suffruticosa]		79.1334	154.54	113.772	112.053	203.381	194.315	121.09	90.2399	44.9818	96.1344	49.2317
EVM0006051	0.860199	salmon	PREDICTED: putative lysine-specific demethylase JMJ16 [Vitis vinifera]		23.157	26.6438	27.6933	29.842	45.8508	28.0788	26.3814	27.1687	11.909	15.983	10.4787
EVM0014978	0.861011	salmon	PREDICTED: serine/threonine-protein kinase GRIK1 isoform X1 [Vitis vinifera]		2.40392	13.573	13.159	12.2534	20.488	13.2358	15.0024	14.2294	10.4937	3.60202	5.80049
EVM0022235	0.520609	salmon	Fatty acid hydroxylase [Parasponia andersonii]		64.8342	81.6384	90.3617	51.227	227.092	164.151	201.767	189.02	208.762	148.238	204.237
Liquidambar_formosana_newGene_7696	0.836803	salmon	#N/A		0.0971677	3.16267	0.818829	3.19539	5.56767	4.68875	7.16146	4.04339	0.522482	0.0613987	0.233429
EVM0007581	0.735334	salmon	dihydrofolate reductase-like [Quercus suber]		21.4289	45.2022	21.0064	55.1565	60.2135	59.7433	26.2112	27.4509	5.39636	23.9099	11.6667
EVM0012805	0.941789	salmon	Protein phosphatase inhibitor 2 (IPP-2) [Macleaya cordata]		25.4652	16.8711	15.869	20.8713	36.7933	30.5479	22.8774	20.7085	11.6243	11.105	15.0855
EVM0008605	0.887828	salmon	PREDICTED: EG45-like domain containing protein [Nelumbo nucifera]		1.69036	4.82727	4.20278	4.52715	15.9443	24.2427	12.4116	6.92887	0.0418967	0.311504	0.21822
EVM0010518	0.478908	salmon	PREDICTED: zinc finger A20 and AN1 domain-containing stress-associated protein 6 isoform X2 [Lupinus angustifolius]		64.8624	33.3435	149.686	23.5599	187.266	80.8842	81.529	73.3482	153.849	117.317	95.5597
EVM0019149	0.502416	salmon	PREDICTED: probable serine/threonine protein kinase IRE4 isoform X1 [Vitis vinifera]		7.61696	12.3838	9.38802	11.8305	16.1766	13.0262	10.4344	9.84819	16.5716	6.94865	13.0099
EVM0029315	0.924883	salmon	methanol O-anthraniloyltransferase-like [Quercus suber]		2.7948	11.3397	0.993087	0.194275	34.1433	15.8392	20.0906	14.3316	0	2.30582	0.011126
EVM0011847	0.84659	salmon	hypothetical protein CICLE_v10033594mg, partial [Citrus clementina]		10.5471	7.2138	12.6723	2.62044	26.7519	30.1367	24.1885	18.0926	2.62634	10.8486	1.26586
EVM0011459	0.49203	salmon	hypothetical protein VITISV_000273 [Vitis vinifera]		9.50762	9.40423	24.5096	15.3202	56.0535	40.4058	14.0887	6.58353	38.0248	17.8923	3.75834
Liquidambar_formosana_newGene_14267	0.865543	salmon	hypothetical protein GOBAR_AA24300 [Gossypium barbadense]		15.5521	16.552	10.8867	15.4974	20.5415	18.7454	18.3524	17.0345	6.34383	8.30956	7.63702
Liquidambar_formosana_newGene_657	0.882598	salmon	transcription elongation factor B polypeptide 3 [Carica papaya]		34.615	28.8418	6.26285	0.0573247	71.1091	14.3968	11.8039	15.8402	0	1.44036	0
EVM0019880	0.975038	salmon	PREDICTED: GDSL esterase/lipase At5g14450-like [Juglans regia]		14.2267	15.7343	10.5375	9.13123	38.933	27.6454	17.1798	14.4415	1.51158	3.55182	2.41286
EVM0019881	0.753835	salmon	VHS domain-containing protein/GAT domain-containing protein [Cephalotus follicularis]		44.1739	48.6679	36.7241	60.9867	57.6496	54.2155	55.2511	57.3024	52.8541	37.496	46.9493
EVM0025311	0.817419	salmon	uncharacterized protein LOC110668938 [Hevea brasiliensis]		106.212	120.977	6.06828	12.5439	407.503	349.968	377.962	320.632	0.109323	56.6012	133.356
EVM0023527	0.537694	salmon	PREDICTED: uncharacterized protein LOC100258878 [Vitis vinifera]		6.1042	5.65454	6.84247	7.39529	8.77146	8.45731	6.05859	6.68985	7.66492	4.68538	5.24755
Liquidambar_formosana_newGene_4046	0.869118	salmon	#N/A		1.09489	0.748274	1.32603	0.758195	2.6331	2.70216	1.58274	2.26624	0.147094	0.249449	0.400239
EVM0009482	0.828196	salmon	unnamed protein product, partial [Vitis vinifera]		12.9445	7.73521	3.0559	1.92615	8.29679	7.97562	2.28294	0.919992	0.0303793	0.578468	0.29095
EVM0008579	0.790455	salmon	6-phosphogluconate dehydrogenase, decarboxylating [Corchorus capsularis]		45.5787	44.8914	50.8095	30.2437	60.8325	76.6134	36.7369	28.3725	21.5394	46.4832	20.7107
EVM0007750	0.745857	salmon	Basic-leucine zipper transcription factor [Parasponia andersonii]		63.3064	32.6504	26.877	28.9263	54.0203	30.1223	35.0889	30.3206	19.587	20.3764	21.0872
EVM0021646	0.465877	salmon	BAHD acyltransferase At5g47980-like [Prunus persica]		0.283878	0.338658	0.392139	0.377968	1.22671	1.28695	0.506725	0.335096	0.807829	0.794451	1.05406
EVM0018527	0.518741	salmon	PREDICTED: probable ADP-ribosylation factor GTPase-activating protein AGD5 [Vitis vinifera]		29.6967	44.7396	101.688	47.5779	101.183	83.2414	73.2689	82.8699	83.9464	85.4158	74.7148
EVM0009976	0.825577	salmon	PREDICTED: cation-chloride cotransporter 1 isoform X1 [Vitis vinifera]		19.7805	24.4586	28.4583	27.0252	33.6956	32.1061	31.7252	31.9891	13.8382	20.091	19.4606
EVM0026319	0.891088	salmon	Pkinase domain-containing protein/LRR_1 domain-containing protein/LRRNT_2 domain-containing protein/LRR_4 domain-containing protein/LRR_8 domain-containing protein [Cephalotus follicularis]		1.67972	2.74914	4.57045	1.67153	5.20045	4.64699	3.21743	2.34174	0.76296	0.72107	0.95056
EVM0013127	0.546277	salmon	peroxidase N-like [Quercus suber]		0.769437	0.238249	1.2238	0.0997313	4.23902	0.198856	0.034366	0.200821	0.0170767	5.63828	0
EVM0004388	0.868926	salmon	hypothetical protein CFOL_v3_14421 [Cephalotus follicularis]		12.1428	25.1165	16.3606	16.1441	44.1119	30.0472	31.555	19.5762	13.99	12.4029	19.6182
EVM0008726	0.794781	salmon	PREDICTED: putative receptor-like protein kinase At4g00960 [Nelumbo nucifera]		1.20591	9.97471	2.31736	2.323	12.8494	7.33847	8.30527	5.31414	4.21789	0.951452	1.08837
EVM0026527	0.864256	salmon	PREDICTED: uncharacterized protein LOC100245966 [Vitis vinifera]		5.40217	9.48588	5.24646	8.2455	18.5388	8.84876	12.636	10.6105	0.65798	2.32645	2.7618
EVM0026526	0.916114	salmon	PREDICTED: epidermis-specific secreted glycoprotein EP1 [Vitis vinifera]		73.3495	10.7707	8.15884	0.969772	180.54	38.2355	44.6381	82.0225	0.515847	0.898792	2.16732
EVM0018648	0.846775	salmon	aspartate aminotransferase, mitochondrial [Momordica charantia]		38.5593	28.2146	25.2074	24.5865	48.5552	19.8277	22.1009	15.7074	4.22076	9.59939	3.88322
EVM0022526	0.64298	salmon	PREDICTED: uncharacterized protein LOC100264766 [Vitis vinifera]		28.1959	45.5627	43.5565	21.4632	43.7165	51.4694	30.0629	38.3037	26.75	43.4981	36.5772
EVM0024274	0.892444	salmon	BI1-like protein [Prunus avium]		2.51999	7.92922	11.8034	9.51743	21.269	7.90327	10.5128	9.98471	1.78522	3.08208	3.61124
EVM0023728	0.763218	salmon	PREDICTED: putative L-ascorbate peroxidase 6 isoform X1 [Vitis vinifera]		3.93833	4.3598	5.97016	3.49559	13.9539	9.39911	13.3408	15.1645	14.1863	2.79564	4.68886
EVM0024492	0.940852	salmon	uncharacterized protein LOC112022319 [Quercus suber]		130.537	56.4716	69.7827	6.65813	291.58	226.311	63.6457	50.5492	12.7349	8.58043	2.16298
EVM0021819	0.902082	salmon	PREDICTED: glutathione synthetase, chloroplastic isoform X1 [Vitis vinifera]		15.1898	17.2693	12.1453	16.4323	37.3456	30.8873	21.7636	21.9362	11.1078	12.6929	7.71883
EVM0027973	0.931939	salmon	PREDICTED: TBC1 domain family member 8B isoform X3 [Vitis vinifera]		27.1988	37.4832	34.4116	30.992	61.0953	59.8236	44.5699	39.9685	8.99648	12.2991	14.0623
EVM0011211	0.953498	salmon	PREDICTED: epidermis-specific secreted glycoprotein EP1-like [Malus domestica]		100.954	36.0471	24.3404	4.0844	154.399	67.6004	58.8721	71.3411	0.364401	2.16449	5.22577
Liquidambar_formosana_newGene_10258	0.810553	salmon	#N/A		2.01148	2.87692	1.02989	3.39041	4.66451	4.27683	5.80472	6.57318	0.359165	0.947263	0.982677
EVM0005206	0.894264	salmon	putative DnaJ protein [Camellia sinensis]		44.9956	81.9965	139.073	46.2878	348.038	288.833	271.654	177.42	86.2982	17.5333	26.7715
EVM0019033	0.598912	salmon	PREDICTED: bZIP transcription factor 44-like [Juglans regia]		23.1132	13.1409	33.3541	31.375	42.5616	21.2082	28.094	27.2053	3.12976	52.004	9.66701
EVM0004058	0.945725	salmon	PREDICTED: protein SRG1 [Ricinus communis]		2.06686	13.9694	1.12151	5.57927	59.5142	27.4866	37.5143	41.8519	0	0.0937083	0.208387
Liquidambar_formosana_newGene_8385	0.879903	salmon	#N/A		0.0694497	0.177212	0.213329	0.104633	1.41652	0.231383	0.22621	0.213183	0.125554	0.0786257	0.0606367
EVM0011024	0.909313	salmon	PREDICTED: uncharacterized protein LOC100259487 isoform X3 [Vitis vinifera]		14.1296	32.4481	17.4942	15.1811	52.6503	47.9775	33.8518	17.543	12.3091	5.90985	3.96779
EVM0020517	0.832761	salmon	LRR and NB-ARC domains-containing disease resistance protein, putative [Theobroma cacao]		2.18975	4.19846	2.77393	4.00971	5.02984	5.78593	4.93151	5.79598	0.717617	1.02683	0.885596
EVM0016138	0.848492	salmon	PREDICTED: anthocyanidin 3-O-glucosyltransferase 2 [Eucalyptus grandis]		2.291	5.34357	1.0058	0.539066	7.78156	5.13108	6.18167	5.6023	0.098037	1.27314	0.036192
EVM0019612	0.877713	salmon	PREDICTED: 1-aminocyclopropane-1-carboxylate oxidase homolog 1 [Vitis vinifera]		75.5967	31.8324	12.0288	10.4305	59.4305	25.0333	32.1578	32.3608	0.329476	11.9763	1.05602
EVM0003897	0.893997	salmon	PREDICTED: stigma-specific STIG1-like protein 1 [Nelumbo nucifera]		0	0.711648	0.843842	0.071093	17.2343	10.1556	7.2779	2.68657	0.0322563	4.96326	0.168301
EVM0025768	0.906092	salmon	MDIS1-interacting receptor like kinase 2 [Citrus clementina]		2.62067	1.99907	0.198566	0	6.76619	2.9727	5.23199	6.40236	0.00309467	0.852572	0.0128753
EVM0015351	0.848164	salmon	PREDICTED: derlin-1 [Nelumbo nucifera]		63.5256	39.9331	35.6318	41.5475	61.4232	54.3106	50.7389	53.7931	37.4872	35.8301	36.4625
EVM0029299	0.806057	salmon	PREDICTED: squalene synthase [Vitis vinifera]		132.108	150.184	217.327	101.1	361.321	429.497	214.431	161.819	190.087	182.699	143.955
EVM0009310	0.739302	salmon	PREDICTED: glycerophosphodiester phosphodiesterase GDPD1, chloroplastic-like [Ziziphus jujuba]		0.376542	0.66474	0.788117	0.736919	2.01629	1.94253	1.03322	0.751173	0.953017	0.214086	0.24171
EVM0002482	0.856861	salmon	PREDICTED: E3 ubiquitin-protein ligase RMA1H1 [Vitis vinifera]		60.1411	69.4443	84.229	52.0561	153.519	75.3557	79.0396	63.2138	60.6796	76.8096	80.5736
EVM0003928	0.882455	salmon	UDP-glucose 6-dehydrogenase 1 [Jatropha curcas]		38.8897	55.3221	56.6887	39.2055	111.929	82.4731	85.5063	74.2879	0.908282	7.874	13.8349
EVM0013692	0.85887	salmon	non-lysosomal glucosylceramidase [Quercus suber]		28.9828	26.9212	41.7799	26.1157	53.2266	51.3491	49.3946	50.2917	24.4535	27.0662	18.706
EVM0013696	0.849498	salmon	PREDICTED: E3 SUMO-protein ligase SIZ1-like isoform X1 [Ziziphus jujuba]		34.5724	34.4233	49.1177	44.1726	56.6371	49.7279	48.0822	48.0597	32.8886	41.394	34.9388
EVM0020712	0.844929	salmon	beta-glucosidase 11-like [Quercus suber]		4.75812	5.90766	4.6758	4.43502	16.6504	8.4968	18.7825	11.2814	3.89936	8.25897	3.71342
EVM0020710	0.689827	salmon	MLO-like protein [Vitis flexuosa]		47.7766	40.2269	80.4465	27.3304	120.66	101.49	91.6671	90.2828	46.7517	112.253	63.5307
EVM0015841	0.981299	salmon	basic 7S globulin-like [Quercus suber]		63.1282	120.041	219.766	9.48189	1165.5	637.633	450.66	293.398	44.8488	28.934	55.1329
EVM0025874	0.737752	salmon	PREDICTED: pentatricopeptide repeat-containing protein At5g25630 [Vitis vinifera]		6.58852	5.23974	4.11198	4.4811	10.5796	9.91601	11.298	11.4501	8.17215	1.78381	5.05818
Liquidambar_formosana_newGene_14573	0.857546	salmon	#N/A		0.578634	1.25404	1.11529	1.12324	1.83085	1.78775	1.60694	1.59958	1.0895	0.558321	0.696866
EVM0006520	0.811993	salmon	3-ketoacyl-CoA synthase 12-like [Quercus suber]		6.80481	11.5482	20.0159	9.68597	42.8724	14.8842	5.69599	2.91352	2.21993	0.176066	0.989799
EVM0006294	0.862418	salmon	PREDICTED: inositol hexakisphosphate and diphosphoinositol-pentakisphosphate kinase 1 isoform X1 [Vitis vinifera]		30.1845	25.7469	16.9711	16.4642	40.0237	36.4445	30.1103	26.5348	20.2659	14.1028	16.0757
EVM0006298	0.871401	salmon	uncharacterized protein LOC105647904 [Jatropha curcas]		20.1063	62.7164	38.887	19.3102	123.231	91.1858	61.8436	54.5692	12.2541	13.8508	5.6496
EVM0008385	0.921815	salmon	PREDICTED: E3 ubiquitin-protein ligase PRT1 [Ziziphus jujuba]		11.0433	8.24706	11.658	7.79553	21.2712	14.8706	16.8739	14.2349	5.94263	4.20698	5.03614
EVM0014930	0.867238	salmon	PREDICTED: major allergen Pru ar 1 [Eucalyptus grandis]		13.6619	19.8039	22.0879	9.87108	83.2615	64.509	33.0486	36.0511	25.6538	14.6167	8.26027
EVM0010773	0.928337	salmon	LOW QUALITY PROTEIN: uncharacterized protein LOC111993890 [Quercus suber]		70.5115	37.9613	39.1177	49.5213	94.6337	66.9831	78.4787	83.6426	38.5508	27.5155	31.4163
EVM0025483	0.965801	salmon	PREDICTED: sulfite reductase [ferredoxin], chloroplastic-like [Nelumbo nucifera]		60.1322	96.2622	51.5511	52.2287	139.308	138.052	122.437	102.357	40.1944	41.6152	40.6988
EVM0000829	0.8103	salmon	PREDICTED: heat shock cognate 70 kDa protein 2-like isoform X1 [Ziziphus jujuba]		2.45959	0.076801	0.283333	0.071133	1.37811	1.04377	0.51534	0.265987	0.151606	0.215235	0.0172477
EVM0003754	0.870354	salmon	ethylene response factor 10 [Actinidia deliciosa]		0.702373	13.0363	4.74894	3.25478	27.3256	20.9784	8.25182	6.46182	6.50521	1.67806	8.34676
EVM0021735	0.94038	salmon	beta-amyrin 28-oxidase [Herrania umbratica]		158.34	259.538	62.0491	4.57367	810.764	552.13	497.98	428.95	9.14647	64.762	18.2876
EVM0022919	0.942224	salmon	protein SRG1-like [Quercus suber]		43.3514	32.5893	31.4581	12.4655	132.137	96.2424	38.9226	26.029	1.28579	2.65773	0.214883
EVM0022917	0.806283	salmon	PREDICTED: uncharacterized protein LOC100262430 [Vitis vinifera]		14.6703	12.4233	14.8163	18.5208	19.6925	16.4929	13.6985	18.8315	4.14772	10.7638	4.50001
Liquidambar_formosana_newGene_6210	0.929833	salmon	#N/A		0.362754	1.17629	0.599036	0.571185	4.51392	1.27658	1.08983	0.620208	0.0148323	0.177036	0.005939
EVM0001760	0.907383	salmon	PREDICTED: serine/threonine protein phosphatase 2A regulatory subunit B&apos;&apos;beta-like [Nelumbo nucifera]		20.0019	19.691	22.1572	17.7223	31.8836	31.2731	23.0191	23.5453	10.8225	18.4764	16.1801
EVM0014471	0.911077	salmon	probable cyclic nucleotide-gated ion channel 20, chloroplastic isoform X4 [Herrania umbratica]		11.1105	17.6874	10.5557	16.7347	31.0217	25.9976	16.9372	15.9054	8.43795	17.8843	7.48787
EVM0015709	0.526076	salmon	PREDICTED: bifunctional dihydrofolate reductase-thymidylate synthase isoform X1 [Vitis vinifera]		51.7046	74.6768	56.8807	28.4707	84.8232	58.8447	55.7597	40.1906	20.0659	38.2526	64.991
EVM0005653	0.785123	salmon	PREDICTED: 6-phosphogluconate dehydrogenase, decarboxylating 3 [Vitis vinifera]		56.901	63.5484	75.1561	44.2722	89.6475	112.146	54.6517	41.0249	29.5233	70.9498	32.6304
EVM0011612	0.860102	salmon	PREDICTED: protein MICRORCHIDIA 7 isoform X1 [Nelumbo nucifera]		0.100402	0.721859	0.776573	0.31205	2.35636	1.61379	1.9556	1.53464	0.00712933	0.0342003	0.01793
EVM0014138	0.94442	salmon	PREDICTED: uncharacterized protein LOC104608266 isoform X2 [Nelumbo nucifera]		31.6791	38.1933	54.0209	50.935	102.895	75.1252	44.2417	44.5455	16.5171	40.4944	18.538
Liquidambar_formosana_newGene_12797	0.932869	salmon	--		6.74759	304.043	39.3802	79.14	490.079	538.572	141.052	221.194	30.3284	3.65397	1.47036
EVM0003282	0.882773	salmon	PREDICTED: protein ABHD17B [Vitis vinifera]		17.203	10.5941	12.9155	10.9778	35.4714	34.0122	31.6791	29.7269	11.7678	19.1881	17.8546
EVM0020237	0.959206	salmon	PREDICTED: probable LRR receptor-like serine/threonine-protein kinase At1g56140 isoform X1 [Vitis vinifera]		5.27614	16.2935	12.7867	7.53069	88.3536	51.0998	27.7577	22.4846	6.35696	13.1898	7.00836
EVM0004183	0.80044	salmon	transcription factor TGA1 isoform X1 [Morus notabilis]		13.9601	10.7739	7.57668	9.01731	21.1477	18.4409	19.494	15.2057	5.58238	9.86283	15.0025
EVM0028222	0.870749	salmon	PREDICTED: uncharacterized protein LOC100261401 isoform X2 [Vitis vinifera]		90.317	67.0658	25.189	37.8757	127.94	115.463	104.636	95.6313	6.55626	13.5549	10.8712
EVM0013861	0.940982	salmon	LRR-RLK [Vernicia fordii]		29.5273	31.4646	7.95065	15.6256	49.8167	27.3556	25.0856	21.5809	4.94656	8.09164	4.04013
EVM0023267	0.843432	salmon	PREDICTED: serine/threonine-protein kinase CDL1-like isoform X2 [Nelumbo nucifera]		38.5291	37.9085	37.3674	22.2827	49.6656	37.8359	40.6744	35.2108	11.4345	18.8938	17.2279
EVM0009579	0.85362	salmon	probable glucan 1,3-beta-glucosidase A [Hevea brasiliensis]		6.91228	44.1105	30.0184	56.5455	111.836	101.47	17.3235	13.1714	1.19903	34.9789	0
EVM0001254	0.83389	salmon	PREDICTED: protein DETOXIFICATION 29 [Vitis vinifera]		99.1013	129.569	88.7843	79.6277	169.619	173.445	123.512	103.156	55.5801	45.3285	8.9779
EVM0006686	0.927121	salmon	PREDICTED: xyloglucan endotransglucosylase/hydrolase 2-like [Nelumbo nucifera]		0.494601	1.17496	0.135454	0	17.4622	2.7932	4.34273	2.22782	0	0	0.054588
EVM0022707	0.614755	salmon	PREDICTED: two-component response regulator-like PRR95 isoform X1 [Vitis vinifera]		19.5288	4.02529	9.40835	3.85157	15.057	4.84124	6.12468	6.38521	4.46094	2.85649	3.76706
EVM0000050	0.941984	salmon	chalcone isomerase [Camellia fraterna]		71.3474	165.024	43.8968	102.48	335.354	295.194	192.402	206.477	6.7428	62.4907	11.5055
EVM0012253	0.869278	salmon	PREDICTED: F-box/kelch-repeat protein At1g80440 [Vitis vinifera]		3.62466	1.6464	0.880018	3.79226	11.872	1.91829	2.14411	1.85741	0	0.915535	0.28847
EVM0000930	0.922995	salmon	hypothetical protein GLYMA_05G010400 [Glycine max]		46.8174	37.4271	21.2783	25.0313	68.4408	56.5137	50.7591	52.878	10.6262	35.1705	21.0585
EVM0009114	0.976459	salmon	PREDICTED: probable LRR receptor-like serine/threonine-protein kinase RFK1 isoform X1 [Vitis vinifera]		9.21634	50.5008	77.8553	31.3992	233.567	114.241	80.1594	82.6083	5.24453	9.66409	11.8864
EVM0009117	0.89184	salmon	hypothetical protein POPTR_0016s08790g [Populus trichocarpa]		29.1962	32.7309	29.8106	35.0208	42.496	43.7957	36.6609	37.0467	12.2012	21.0398	17.383
EVM0024656	0.889147	salmon	probable mediator of RNA polymerase II transcription subunit 26b isoform X1 [Hevea brasiliensis]		1.2066	3.22754	3.52705	3.30489	5.89155	5.82843	4.10322	4.39863	0.167928	0.658458	0.958832
EVM0025245	0.837634	salmon	adh_short domain-containing protein [Cephalotus follicularis]		29.8435	19.6959	25.419	55.6368	65.1534	57.195	49.7556	32.4011	0.459382	19.8031	4.78795
EVM0001683	0.845386	salmon	PREDICTED: alkaline/neutral invertase A, mitochondrial-like [Cucumis sativus]		15.8293	17.6883	36.1938	19.1516	59.7629	27.1435	28.4306	27.9744	35.9726	21.4997	16.2834
EVM0015060	0.960262	salmon	PREDICTED: beta-fructofuranosidase, insoluble isoenzyme CWINV1 [Eucalyptus grandis]		63.7028	67.8419	91.4799	32.5702	345.94	168.426	108.126	82.8852	31.928	17.777	11.2866
EVM0004338	0.868314	salmon	PREDICTED: trehalase isoform X1 [Vitis vinifera]		33.8433	28.6549	38.064	23.5674	56.1527	25.8244	34.5643	27.7684	2.89834	12.2094	9.54566
EVM0004483	0.891441	salmon	uncharacterized protein LOC112003724 [Quercus suber]		26.866	32.2348	2.30741	2.77985	225.13	73.1575	109.521	104.727	0.349748	8.36089	7.25791
EVM0003594	0.788649	salmon	protein P21-like [Quercus suber]		147.168	32.8885	13.5429	15.7804	65.9966	68.7875	47.3484	38.8717	8.35394	28.6161	6.90197
EVM0016745	0.917311	salmon	mitochondrial succinate-fumarate transporter 1 [Citrus clementina]		11.1386	13.6625	13.8642	12.0649	27.1534	22.2644	21.0873	21.5922	5.03373	8.99807	6.5272
EVM0014072	0.700511	salmon	hypothetical protein COLO4_04217 [Corchorus olitorius]		61.9898	14.7088	24.74	2.74016	64.2393	34.5029	37.8214	52.0734	52.5072	21.5974	11.7003
EVM0025731	0.882173	salmon	phytosulfokine receptor 1-like [Manihot esculenta]		0.870308	1.74285	3.90889	0.723197	5.20305	6.73242	1.6156	1.43053	0.409457	0.0416687	0.0765657
Liquidambar_formosana_newGene_11080	0.812504	salmon	PREDICTED: phytosulfokines 3-like [Ziziphus jujuba]		0.0122603	16.6482	4.43045	5.25862	17.8269	8.1558	8.1795	5.33692	1.02018	0.186439	0.0755533
EVM0020087	0.915251	salmon	PREDICTED: uncharacterized protein LOC100245765 [Vitis vinifera]		1.2019	4.0889	3.68288	5.02273	11.1601	6.848	9.06049	6.04818	0.115069	2.34571	1.51163
EVM0008807	0.945901	salmon	3-methyl-2-oxobutanoate hydroxymethyltransferase 1, mitochondrial [Manihot esculenta]		9.56301	44.9923	28.4954	20.065	83.8046	57.8102	33.4387	40.7217	22.0913	10.4921	8.61128
EVM0009323	0.777632	salmon	PREDICTED: bidirectional sugar transporter SWEET2a [Vitis vinifera]		29.9613	8.05493	12.5006	3.40181	46.8015	37.5079	44.0588	40.3964	13.2495	23.6694	19.1537
EVM0019856	0.617385	salmon	PREDICTED: lipid phosphate phosphatase delta [Vitis vinifera]		37.6495	30.9704	58.1667	37.2762	67.918	50.3517	37.5975	45.3081	53.9506	36.4397	47.8459
EVM0018021	0.898141	salmon	NADP-dependent malic enzyme-like [Quercus suber]		63.9947	126.257	80.0994	32.0723	551.948	455.755	450.747	320.909	50.0316	111.952	50.0767
EVM0016411	0.915975	salmon	PREDICTED: putative dual specificity protein phosphatase DSP8 [Ziziphus jujuba]		77.5191	81.991	111.456	77.72	143.338	117.098	108.839	109.669	37.7969	37.9649	36.0713
Liquidambar_formosana_newGene_8645	0.789607	salmon	#N/A		0.323954	0.500505	1.47563	1.30644	2.5086	0.564827	0.995546	0.890797	0.542937	0.76265	0.407858
EVM0011072	0.876223	salmon	acetolactate synthase small subunit 1, chloroplastic-like [Prunus avium]		27.6644	43.8816	38.5397	28.5322	63.6592	65.9559	54.1705	49.6606	25.038	12.3917	11.9668
EVM0016184	0.919062	salmon	PREDICTED: mitochondrial substrate carrier family protein C [Ziziphus jujuba]		15.3617	26.3573	15.2976	15.8214	44.469	32.5435	29.824	28.7622	17.4092	9.26219	11.0168
EVM0009779	0.83429	salmon	Band 7 protein [Corchorus capsularis]		3.26563	0.0499773	0.331209	0.128864	1.65293	0.409	0.691898	1.42216	0	0.280663	0
EVM0006556	0.847609	salmon	hypothetical protein BVC80_1825g63 [Macleaya cordata]		3.03308	10.0061	9.48587	7.65125	50.6776	29.897	27.3101	31.6798	12.5623	11.6829	16.361
EVM0004178	0.636115	salmon	PRK domain-containing protein [Cephalotus follicularis]		0.058165	0.183323	0.645311	0.583172	2.40336	0.547723	1.78104	1.83804	0	0.312655	0.585661
EVM0011136	0.835883	salmon	nudix hydrolase 25 isoform X1 [Morus notabilis]		81.7102	77.9001	56.6769	66.5145	108.995	87.6084	63.8368	51.7048	9.40613	38.499	39.2735
EVM0016022	0.920964	salmon	PREDICTED: pectinesterase 2 [Vitis vinifera]		66.3009	4.97109	2.32615	0.887071	31.7256	10.6021	6.68504	7.22956	0	0.240789	0
EVM0010741	0.83642	salmon	PREDICTED: pyruvate dehydrogenase E1 component subunit beta-1, mitochondrial [Cucumis sativus]		28.5504	39.9307	25.5649	28.7054	47.3474	70.8962	31.668	28.4862	23.4622	33.6835	17.8594
EVM0000876	0.923902	salmon	hypothetical protein CFOL_v3_05077 [Cephalotus follicularis]		23.9594	10.0623	8.18285	2.59762	40.9536	18.8778	14.9889	12.5406	2.84737	2.73291	9.97724
EVM0001473	0.913266	salmon	glu S.griseus protease inhibitor [Citrus clementina]		47.2644	34.6952	7.08104	0.483828	738.463	339.856	97.0097	56.8993	0	0	0
EVM0008413	0.885724	salmon	PREDICTED: thioredoxin-like 1-2, chloroplastic [Vitis vinifera]		51.1233	50.5391	72.1665	28.9951	138.104	122.648	92.7684	77.4329	12.2771	12.0378	10.9428
EVM0001868	0.926195	salmon	proline-rich receptor-like protein kinase perk8 [Quercus suber]		4.21698	11.567	38.5079	6.70839	67.7279	43.5522	34.8297	28.1626	6.61617	8.67983	4.04968
EVM0020956	0.740994	salmon	PREDICTED: VQ motif-containing protein 17 [Vitis vinifera]		39.8462	9.35763	13.183	31.5854	44.7722	17.9333	7.00647	6.56098	6.36261	3.14702	1.67963
EVM0021704	0.5459	salmon	PREDICTED: uncharacterized protein LOC103332654 [Prunus mume]		15.8088	30.4531	82.3254	14.9225	88.8595	76.2416	62.4897	63.9246	68.6837	46.2709	50.8292
EVM0022943	0.934907	salmon	PREDICTED: probable LRR receptor-like serine/threonine-protein kinase At1g56140 isoform X1 [Juglans regia]		18.9328	13.2722	17.1715	9.87448	56.1394	34.3008	43.6133	46.8363	15.9759	12.9326	11.905
EVM0026911	0.919115	salmon	hypothetical protein VITISV_007899 [Vitis vinifera]		0.0167913	0.654385	1.92993	0.843653	3.56702	1.76968	1.53566	1.75479	0.244508	0.143021	0.886688
EVM0016619	0.90162	salmon	PREDICTED: basic 7S globulin-like [Juglans regia]		5.5743	17.4364	18.8241	6.01592	117.71	73.7479	32.5531	20.3806	19.7701	12.1563	14.9485
EVM0009240	0.603878	salmon	abscisic acid 8&apos;-hydroxylase 2 [Durio zibethinus]		0.264004	10.8073	9.71078	34.2005	30.2956	18.7113	9.41108	6.80915	0.714318	17.3041	1.04669
EVM0020246	0.954578	salmon	DUF2359 domain-containing protein [Cephalotus follicularis]		35.7306	64.1948	55.6821	46.5567	101.481	80.4234	63.3775	55.5999	14.6114	25.1013	25.2198
EVM0007409	0.809302	salmon	hypothetical protein VITISV_035274 [Vitis vinifera]		0	0.922688	1.96632	2.04763	4.75132	0.498407	1.42845	1.94617	0	0.331345	0
EVM0026546	0.966925	salmon	BAHD acyltransferase At5g47980-like [Hevea brasiliensis]		12.2108	2.34755	2.97685	2.08779	32.6864	27.7962	9.87813	5.83127	0.065715	0.42629	0.087666
EVM0021328	0.934826	salmon	#N/A		86.196	54.8308	24.8215	7.59983	166.255	128.372	72.4545	50.2504	18.8563	16.0283	17.6547
EVM0026786	0.820357	salmon	uncharacterized protein LOC18047752 [Citrus clementina]		24.6127	16.6324	6.89156	12.851	28.8753	23.23	24.1464	23.5206	0.529801	2.36304	2.37872
EVM0017825	0.851837	salmon	PREDICTED: uncharacterized protein LOC102607807 [Citrus sinensis]		4.79973	6.25017	7.36583	5.8914	12.4262	8.66172	9.69199	10.3618	6.27818	6.24635	5.69182
EVM0017822	0.895974	salmon	PREDICTED: uncharacterized protein LOC18608721 [Theobroma cacao]		403.62	75.4546	59.7519	54.8706	252.174	101.656	90.754	79.6881	8.55385	16.2833	41.4083
EVM0020439	0.938729	salmon	PREDICTED: LIM domain-containing protein PLIM2c [Vitis vinifera]		0.028255	0.240379	0	0.172013	3.66473	1.50788	1.64859	2.4261	0.180235	0	0.335399
EVM0010989	0.822908	salmon	PREDICTED: probable folate-biopterin transporter 3 [Vitis vinifera]		7.01153	26.9174	43.3292	20.3375	59.3556	37.0552	27.5681	16.9973	19.1721	18.4091	9.40371
EVM0024064	0.931651	salmon	PREDICTED: uncharacterized protein LOC102607807 [Citrus sinensis]		15.6331	15.2235	20.9118	13.7216	39.7975	27.0263	29.6777	29.2655	14.6168	15.2583	16.2054
EVM0026240	0.890358	salmon	auxin-responsive protein SAUR32-like [Quercus suber]		49.4042	28.5365	35.2079	56.625	120.107	37.0779	39.4073	38.1281	2.42018	30.5704	8.09471
EVM0027524	0.88009	salmon	PREDICTED: uncharacterized protein LOC107420071 [Ziziphus jujuba]		108.912	79.1484	96.8927	80.4816	113.324	99.0661	95.7121	85.6755	36.6708	75.2064	38.9726
EVM0018505	0.910885	salmon	carboxylesterase 1-like [Quercus suber]		3.55806	2.24929	1.18367	0.513328	9.68846	3.53318	3.73065	2.77969	0.0363413	3.28041	0.116048
EVM0015887	0.962934	salmon	PREDICTED: putative receptor protein kinase ZmPK1 [Vitis vinifera]		6.42668	9.14667	8.53028	3.03377	22.5865	13.6034	7.56198	5.73938	0.54096	0.52707	1.3048
EVM0010437	0.84388	salmon	calcineurin subunit B [Citrus clementina]		22.7881	12.6567	11.1987	10.3718	19.066	16.3394	17.8015	16.8417	5.02812	7.81522	7.69782
Liquidambar_formosana_newGene_7817	0.932385	salmon	aminodeoxychorismate synthase, chloroplastic-like [Olea europaea var. sylvestris]		8.4094	19.3617	20.8837	18.0613	42.0756	36.5199	32.275	38.3194	7.86875	7.05635	4.26668
EVM0021207	0.88345	salmon	beta-glucosidase 1 GH1 family [Camellia sinensis]		176.276	20.0098	66.2283	11.3566	220.445	37.1039	29.7761	22.3776	0	9.05763	0.118197
EVM0021206	0.847956	salmon	PREDICTED: uncharacterized protein LOC100254161 [Vitis vinifera]		24.2411	21.5841	21.6563	21.1339	30.936	27.466	28.9895	26.9937	14.2818	10.6533	10.857
EVM0003097	0.839507	salmon	hypothetical protein CCACVL1_19621 [Corchorus capsularis]		7.8243	7.72728	8.73495	8.90021	10.5348	9.35052	8.67178	7.86466	2.57411	3.75959	3.35103
EVM0024142	0.900664	salmon	AT-hook DNA-binding family protein, putative [Theobroma cacao]		13.8017	20.1955	31.8094	17.9575	44.5747	31.8587	31.0488	24.8083	0.0698573	21.2234	1.83267
EVM0009780	0.803828	cyan	galactinol synthase 2-like [Olea europaea var. sylvestris]		1.93952	46.9182	145.591	10.4982	87.9029	86.7255	73.0291	56.27	2.37876	10.4696	5.42025
EVM0024434	0.94828	cyan	receptor-like protein kinase FERONIA [Hevea brasiliensis]		8.72431	8.05966	20.643	8.42921	17.2656	12.4279	9.2345	8.34143	1.8339	4.42422	1.97626
EVM0020328	0.877177	cyan	PREDICTED: protein RRP6-like 2 isoform X1 [Juglans regia]		29.1119	48.3614	51.3474	33.2311	55.0511	57.5912	41.767	35.4285	9.68495	14.6735	14.4305
EVM0000888	0.862224	cyan	B3 domain-containing transcription factor FUS3 [Herrania umbratica]		0.0985467	53.4332	66.2888	43.2258	70.4274	62.4821	45.7365	49.9268	0.0501627	0.020478	0.326844
EVM0008421	0.7809	cyan	G-type lectin S-receptor-like serine/threonine-protein kinase LECRK4 [Hevea brasiliensis]		1.09152	1.75209	3.39505	0.690695	1.38577	1.47419	1.17615	1.329	0.44762	0.0693353	0.816065
EVM0008429	0.848978	cyan	Glutathione S-transferase tau 7 [Theobroma cacao]		56.7673	35.4972	73.7492	15.7329	82.8618	48.2422	19.8846	12.0968	0.0638933	12.1868	2.59592
EVM0020908	0.816146	cyan	PREDICTED: peroxidase 4-like [Vitis vinifera]		20.0483	156.86	388.76	281.89	409.33	261.015	49.6741	34.7329	0.6197	70.3229	9.05849
EVM0022226	0.847602	cyan	PREDICTED: IQ domain-containing protein IQM3-like [Ziziphus jujuba]		16.3761	51.2897	59.9511	36.4419	61.9186	51.1533	30.2663	19.6888	3.68941	9.79723	4.84067
EVM0007802	0.742401	cyan	PREDICTED: casparian strip membrane protein 1 [Eucalyptus grandis]		0.792267	1.07016	8.42078	0.127095	4.19461	2.10213	1.8244	3.29442	0	1.06158	0.027631
EVM0020158	0.94915	cyan	PREDICTED: uncharacterized protein LOC100255664 [Vitis vinifera]		12.1756	37.8502	99.0362	26.3882	79.7062	89.5648	43.7961	30.6827	3.86522	14.7296	21.6102
EVM0016901	0.702091	cyan	PREDICTED: pectinesterase-like [Nelumbo nucifera]		0.41941	1.88637	4.22873	1.58254	3.01633	1.34302	1.08891	0.646691	2.28348	0.211657	0.382943
EVM0016229	0.777504	cyan	PREDICTED: CID domain-containing protein 1 [Vitis vinifera]		9.2288	19.3456	17.8397	16.0327	18.1619	22.0589	17.0635	18.0807	5.83635	4.46079	5.85083
EVM0027381	0.915402	cyan	2OG-FeII_Oxy domain-containing protein/DIOX_N domain-containing protein [Cephalotus follicularis]		190.145	88.1089	157.143	53.3237	115.276	206.174	70.8425	59.1465	1.58441	21.0067	0
EVM0007214	0.909765	cyan	PREDICTED: threonine synthase, chloroplastic [Vitis vinifera]		37.0664	48.8012	77.462	29.9008	44.8055	55.0575	37.464	38.9192	23.9532	23.7978	15.5155
EVM0025393	0.756388	cyan	glutathione transferase GST 23-like [Quercus suber]		35.0855	23.8725	79.5898	21.8239	86.4345	77.8382	51.9162	37.4658	26.5056	59.7429	17.6015
EVM0009704	0.736641	cyan	Amino acid transporter, transmembrane [Corchorus capsularis]		86.8761	141.574	341.68	115.633	387.159	379.187	210.918	134.623	217.583	215.032	72.513
Liquidambar_formosana_newGene_2168	0.848144	cyan	#N/A		0.493354	1.03676	3.51773	1.21782	2.09434	1.70015	2.04916	2.42268	0.151722	0.548707	0.378438
EVM0016785	0.739411	cyan	uncharacterized protein LOC110600358 [Manihot esculenta]		4.23196	5.75916	6.43817	3.37806	4.62405	4.89201	3.82467	4.25859	1.10557	4.02271	0.264201
EVM0004470	0.869653	cyan	PREDICTED: uncharacterized protein LOC104597881 [Nelumbo nucifera]		1.51351	0.926845	4.96345	1.79149	2.92017	1.61386	1.34369	1.42569	0.13436	0.33627	0.580805
EVM0002159	0.794557	cyan	uncharacterized protein LOC110769345 [Prunus avium]		4.76066	5.12305	6.52494	2.35599	5.45061	10.2204	4.25661	3.6975	0.639903	1.3193	0.88145
EVM0011443	0.875145	cyan	phenylalanine ammonia-lyase 2 [Vitis vinifera]		9.34914	36.9098	112.021	25.5397	90.8973	71.6377	32.428	19.3635	2.54478	41.0037	4.70675
EVM0000806	0.487211	cyan	protein C2-DOMAIN ABA-RELATED 11-like isoform X2 [Durio zibethinus]		16.1076	18.5369	55.4511	12.2778	58.7293	61.278	45.9685	35.04	45.3171	35.2159	39.0585
Liquidambar_formosana_newGene_7517	0.835334	cyan	PREDICTED: protein PHOTOPERIOD-INDEPENDENT EARLY FLOWERING 1 [Vitis vinifera]		17.9517	21.5931	29.8693	27.6108	31.4792	28.1431	26.3163	27.3544	15.4375	14.6239	13.939
EVM0027804	0.646763	cyan	PREDICTED: uncharacterized protein LOC107419752 [Ziziphus jujuba]		5.19262	6.75856	13.2326	6.0335	7.70513	9.89325	8.72277	6.98454	3.70216	8.66042	6.81774
EVM0024899	0.880196	cyan	unnamed protein product, partial [Vitis vinifera]		121.493	343.469	362.211	85.2092	303.051	480.285	101.226	59.504	0.0561713	8.6228	0.0341987
EVM0009239	0.850324	cyan	PREDICTED: probable transcription factor At5g28040 [Vitis vinifera]		15.0155	15.2455	20.351	14.2488	18.5697	15.5045	16.8475	13.5513	3.05664	9.44286	5.43909
EVM0007292	0.605344	cyan	protein trichome birefringence-like 8 [Quercus suber]		3.59664	1.8111	3.47815	4.43622	4.88804	1.97622	1.03553	1.40421	0.728821	1.53916	0.478237
EVM0022301	0.764913	cyan	PREDICTED: small glutamine-rich tetratricopeptide repeat-containing protein 2 isoform X2 [Cucumis melo]		2.34951	7.76732	7.34544	6.1199	4.86581	7.22683	4.94209	5.72485	0.646306	1.19663	0.870686
EVM0025544	0.868848	cyan	probable WRKY transcription factor 51 [Durio zibethinus]		9.73018	6.81451	16.4187	6.59917	8.5501	6.88853	3.80169	7.31793	0.296546	1.44897	0.386241
EVM0003462	0.880122	cyan	PREDICTED: uncharacterized protein LOC100245395 [Vitis vinifera]		20.3729	19.3371	24.3362	14.2564	21.0411	25.1169	19.1884	18.0564	7.15148	15.0928	9.84351
EVM0023492	0.903174	cyan	PREDICTED: zinc finger CCCH domain-containing protein 30-like [Juglans regia]		34.9757	34.9506	52.8609	40.9024	51.0417	50.1793	48.203	43.8678	16.6405	35.8777	21.6462
EVM0027974	0.672875	cyan	germin-like protein subfamily 1 member 7 isoform X3 [Durio zibethinus]		7.20564	43.9714	58.0778	38.9354	87.7392	44.4878	3.167	1.98655	0.0538147	25.0207	0.0437203
EVM0016436	0.850304	cyan	PREDICTED: cyclin-dependent kinase F-4 [Vitis vinifera]		77.6817	75.3949	137.696	90.7489	128.168	111.44	116.965	125.072	42.6519	88.0998	69.5779
EVM0017389	0.894531	cyan	PREDICTED: protein SPT2 homolog isoform X1 [Nelumbo nucifera]		0.041747	0.419998	2.01267	0.236311	1.31224	0.691233	1.18058	0.482375	0.012257	0.0536927	0.142052
EVM0012689	0.899475	cyan	PREDICTED: uncharacterized protein LOC109007319 [Juglans regia]		77.3674	173.578	179.162	127.217	142.588	214.838	98.1173	74.8898	37.4046	86.1913	38.8297
EVM0028977	0.459348	cyan	unnamed protein product [Coffea canephora]		7.27632	8.00836	15.5127	7.20273	11.1185	11.0923	11.4819	13.6731	5.04764	16.9447	8.61154
EVM0022530	0.788333	cyan	uncharacterized protein LOC111983063 [Quercus suber]		0.167567	30.7227	33.1844	27.4604	35.872	18.9924	27.7805	17.3816	0.415816	0.0953203	0.12234
EVM0024482	0.759896	cyan	PREDICTED: uncharacterized protein At1g04910 [Vitis vinifera]		10.5649	28.4199	31.482	25.0956	26.5238	26.7842	28.6094	24.4826	9.38972	14.6527	17.9077
EVM0020390	0.814659	cyan	uncharacterized protein LOC111997497 [Quercus suber]		35.6191	42.8691	63.074	28.4878	77.8314	69.2996	63.7816	44.2333	20.3641	50.4702	39.6104
EVM0000663	0.718982	cyan	putative wd repeat-containing protein c2a9.03 [Quercus suber]		55.4628	39.8738	255.532	48.0256	125.482	116.404	155.984	127.191	46.0747	92.8581	64.1785
EVM0001895	0.693832	cyan	unnamed protein product, partial [Vitis vinifera]		0	0.862371	5.13869	3.50989	3.92747	4.06172	7.10571	6.62834	0	0	0.890313
EVM0026080	0.599981	cyan	PREDICTED: cinnamoyl-CoA reductase 1-like [Populus euphratica]		10.4452	41.4725	33.0532	37.6153	52.6881	55.0018	39.5553	29.4246	0.262891	52.8404	0.49175
EVM0016832	0.802926	cyan	PREDICTED: DEAD-box ATP-dependent RNA helicase 36 [Vitis vinifera]		16.6318	18.6265	21.0516	13.2159	21.6782	25.2932	19.6444	18.2565	8.19442	13.9585	11.8679
EVM0009651	0.847801	cyan	PREDICTED: protein SMG7 [Vitis vinifera]		35.209	38.0585	81.346	47.0172	56.9869	51.9114	51.8959	58.9005	13.9662	40.4255	27.4922
EVM0023893	0.839556	cyan	unnamed protein product, partial [Vitis vinifera]		22.9264	85.0213	74.4744	21.7198	77.2457	131.596	24.2158	11.8322	0	1.93359	0.0141547
EVM0025388	0.830253	cyan	RecName: Full=Beta-amyrin synthase		159.091	150.246	143.075	114.012	201.513	206.413	99.9245	63.7307	6.81052	50.8474	8.63545
EVM0021236	0.511523	cyan	protein GIGANTEA isoform X1 [Prunus avium]		24.619	10.1622	40.1712	27.674	28.3567	23.3473	27.3587	39.0732	18.3837	17.9972	30.1213
Liquidambar_formosana_newGene_931	0.779836	cyan	#N/A		2.34416	2.12641	3.84993	2.76713	2.52443	2.93694	2.65166	2.03291	1.23557	1.65975	1.3695
EVM0017655	0.866757	cyan	PREDICTED: protein GAMETE EXPRESSED 2 isoform X2 [Vitis vinifera]		0.252268	0.567481	1.31209	0.406767	0.889935	1.15908	0.80883	0.600553	0.381149	0.254355	0.337676
EVM0008100	0.927649	cyan	cysteine-rich receptor-like protein kinase 29 [Quercus suber]		17.3763	18.8752	39.9074	7.01513	33.388	20.8282	14.9688	10.606	1.91318	5.158	1.76529
EVM0001552	0.750543	cyan	PREDICTED: probable indole-3-pyruvate monooxygenase YUCCA7 [Ziziphus jujuba]		0.535461	8.78003	22.1835	0.720746	6.78933	5.57061	7.34148	2.45221	0	0.139026	0.00875767
EVM0000202	0.687312	cyan	mitogen-activated protein kinase kinase kinase 3 [Carica papaya]		28.4203	26.455	40.4503	35.5274	37.4157	33.0182	33.1637	35.4816	30.0803	37.7298	20.3057
EVM0007661	0.765905	cyan	putative receptor-like protein kinase At4g00960 isoform X1 [Durio zibethinus]		0.428025	0.0548527	1.87232	0.0917757	0.72474	0.203125	0.062025	0.0761777	0	0	0
EVM0001967	0.819704	cyan	probable glutathione S-transferase [Prunus persica]		10.3221	4.64931	4.80044	2.08672	5.32497	6.97488	3.99087	3.51667	0	1.9234	0
EVM0019520	0.72967	cyan	PC-Esterase domain-containing protein/PMR5N domain-containing protein [Cephalotus follicularis]		0.825544	0.927646	2.40162	1.31697	1.39383	1.80341	2.10229	1.55327	0.309161	1.10573	1.30275
EVM0011190	0.824329	cyan	PREDICTED: peroxisome biogenesis protein 2 [Vitis vinifera]		7.5729	9.0596	12.8615	8.59149	9.42927	11.1185	10.5613	8.46427	4.61586	7.40387	5.05353
EVM0018043	0.877199	cyan	PREDICTED: 7-deoxyloganetic acid glucosyltransferase [Vitis vinifera]		32.486	51.5889	122.336	100.711	133.738	107.072	82.8284	52.1637	8.00628	39.0244	5.13025
EVM0022276	0.862292	cyan	hypothetical protein POPTR_018G010000v3 [Populus trichocarpa]		3.72377	6.56757	21.8326	8.14356	22.4258	14.4468	5.74691	3.33117	0.12017	3.299	0.130761
EVM0023657	0.819803	cyan	GTP-binding protein BRASSINAZOLE INSENSITIVE PALE GREEN 2, chloroplastic [Prunus avium]		8.236	10.0436	14.7293	8.92758	9.70095	12.3942	11.4294	9.96524	3.23607	5.61985	4.3487
EVM0029080	0.812589	cyan	PREDICTED: protein SDA1 homolog isoform X1 [Juglans regia]		24.058	24.3341	33.3239	20.7868	27.6824	31.6197	31.1822	28.9372	13.1648	16.7305	16.1941
EVM0007420	0.911701	cyan	unnamed protein product, partial [Vitis vinifera]		25.6552	49.5536	58.0217	30.4122	47.9533	57.8549	42.641	30.1901	15.6907	18.8596	22.1844
EVM0005050	0.722197	cyan	#N/A		7.38247	0.811585	4.35035	0.891732	11.5824	2.81147	6.50814	5.45832	0.048597	0.53875	0.259136
EVM0015796	0.846233	cyan	PREDICTED: MDIS1-interacting receptor like kinase 2-like [Juglans regia]		1.09226	1.02976	2.42812	1.10545	1.54814	2.05822	0.435538	0.443875	0.004982	0.290129	0.056912
EVM0016219	0.885411	cyan	PREDICTED: uncharacterized protein LOC108979087 isoform X1 [Juglans regia]		8.80266	14.1576	23.5468	16.8111	22.2031	20.8567	12.4231	10.7976	7.25396	9.08313	7.24412
EVM0021170	0.796249	cyan	hypothetical protein POPTR_0016s12480g [Populus trichocarpa]		4.2443	27.129	100.903	18.0133	78.0661	98.4069	68.22	40.077	26.7912	47.3921	25.7759
EVM0001623	0.664362	cyan	mevalonate kinase isoform X1 [Jatropha curcas]		21.0087	38.0907	35.3788	22.3753	44.3114	69.5907	21.2918	13.6944	29.3678	20.6459	12.9911
EVM0010247	0.860007	cyan	PREDICTED: probable ubiquitin-conjugating enzyme E2 26 [Juglans regia]		26.303	44.2091	45.7656	36.3631	59.5711	51.2266	50.1894	46.9122	12.3547	14.6842	17.1474
EVM0000593	0.663522	cyan	PREDICTED: IAA-amino acid hydrolase ILR1-like 6 [Ziziphus jujuba]		28.6037	7.92253	82.9025	15.4695	40.5868	21.7721	19.9768	20.3928	21.3419	32.7166	25.1595
EVM0013187	0.546602	cyan	topless-related protein 1-like isoform X2 [Quercus suber]		1.09009	4.91762	7.26999	4.37578	5.06626	4.65031	4.99058	9.50385	3.36709	1.46225	3.4194
EVM0008477	0.896844	cyan	PREDICTED: uncharacterized protein LOC104592070 isoform X1 [Nelumbo nucifera]		3.28175	4.9024	8.14676	1.47253	6.79717	8.95471	5.9353	2.54152	0.83388	0.649536	0.190544
EVM0015125	0.695263	cyan	PREDICTED: YTH domain-containing family protein 3 isoform X2 [Vitis vinifera]		31.3726	40.5044	80.8618	58.734	52.8096	60.6332	63.2894	62.8988	48.399	54.7912	27.8634
EVM0008298	0.891575	cyan	PREDICTED: uncharacterized protein LOC100254092 [Vitis vinifera]		31.8645	29.1349	61.4553	35.546	41.4016	42.6535	25.4894	20.8808	17.2961	11.9933	13.7635
EVM0010167	0.766138	cyan	PREDICTED: U-box domain-containing protein 33 [Vitis vinifera]		7.15009	9.44535	15.8535	12.3744	15.0811	12.0735	12.2349	10.9903	8.99684	3.95331	9.55348
EVM0025656	0.70729	cyan	PREDICTED: F-box/kelch-repeat protein At1g57790-like [Gossypium hirsutum]		0	0.30512	0.715802	0.209371	0.404271	0.758402	0.928081	0.78297	0.017067	0	0
EVM0013051	0.88254	cyan	PREDICTED: probable WRKY transcription factor 75 [Juglans regia]		19.7505	14.9713	80.5499	15.9668	39.4769	39.3528	30.2455	26.3867	11.0116	15.2261	5.33274
EVM0009266	0.654584	cyan	PREDICTED: transmembrane protein 45A [Prunus mume]		12.4165	11.0354	20.7937	16.4298	19.3347	16.3156	14.3352	14.0173	8.75223	20.5403	9.27342
EVM0016437	0.544715	cyan	PREDICTED: autophagy-related protein 2 isoform X11 [Vitis vinifera]		25.2992	18.5771	32.1271	36.5141	32.705	22.716	23.3885	26.6242	26.3183	20.4909	18.5251
EVM0017388	0.807568	cyan	PREDICTED: F-box protein PP2-A12 [Vitis vinifera]		40.4342	32.0069	211.872	37.8234	117.951	52.6426	60.5955	50.5661	24.829	55.6644	30.5955
EVM0027945	0.724384	cyan	LRR_1 domain-containing protein/LRRNT_2 domain-containing protein/LRR_4 domain-containing protein [Cephalotus follicularis]		15.5475	8.00241	11.2222	10.1182	15.8465	13.7464	5.15952	2.3226	0.279422	4.21654	0.437492
EVM0002923	0.855911	cyan	PREDICTED: uncharacterized protein LOC101307011 [Fragaria vesca subsp. vesca]		6.03737	4.90338	9.95266	7.58598	8.58583	7.85095	7.29783	7.61336	2.17061	5.31441	3.16488
EVM0026560	0.890584	cyan	bZIP transcription factor 16-like [Prunus avium]		44.9689	57.9756	63.8499	58.0502	68.0065	69.9652	58.4174	56.3229	30.7418	39.0848	35.5651
EVM0013814	0.790176	cyan	guanine nucleotide-binding protein subunit beta-2 [Quercus suber]		47.5803	83.2848	91.4244	59.0106	121.312	113.937	81.3226	78.0519	46.118	47.6987	38.2911
EVM0027331	0.881838	cyan	PREDICTED: L-type lectin-domain containing receptor kinase IX.1-like [Vitis vinifera]		0.303659	0.856582	3.08707	1.08343	4.44432	1.5912	0.958057	0.653226	0.0491037	0.382294	0.0127227
EVM0026760	0.827454	cyan	PREDICTED: ubiquitin-conjugating enzyme E2-23 kDa [Theobroma cacao]		10.2724	63.2024	76.3137	41.6682	66.3215	56.065	63.7585	56.0459	3.79377	14.0494	22.5981
EVM0005127	0.777395	cyan	PREDICTED: guanine nucleotide-binding protein alpha-1 subunit [Vitis vinifera]		25.9677	36.0763	53.5956	31.4304	41.4272	47.597	46.6338	45.7706	19.4204	33.6385	38.6898
EVM0011253	0.862946	cyan	PREDICTED: uncharacterized protein LOC100241609 [Vitis vinifera]		3.00988	3.11469	4.93014	3.63836	4.08522	4.74457	4.0527	3.6799	1.95283	3.29353	2.25206
EVM0004607	0.844596	cyan	trihelix transcription factor ASIL2-like [Durio zibethinus]		21.5931	30.5982	53.4354	25.1054	38.5083	39.8119	46.1908	42.5686	18.2049	22.792	22.2179
EVM0021565	0.858605	cyan	protein MICRORCHIDIA 7 isoform X2 [Jatropha curcas]		27.7739	51.4185	71.998	43.9136	75.1487	67.3082	71.992	66.6038	9.95684	12.7771	16.4247
EVM0017142	0.736392	cyan	PREDICTED: ATP-citrate synthase beta chain protein 2 [Gossypium raimondii]		128.91	219.291	282.94	135.854	419.614	723.385	271.244	185.629	140.922	169.492	119.293
EVM0018029	0.846913	cyan	vinorine synthase-like [Durio zibethinus]		22.3825	18.9083	54.8169	20.0004	38.9148	30.4733	12.2163	10.4973	4.28569	8.76699	2.20824
EVM0007717	0.760407	cyan	PREDICTED: small nuclear ribonucleoprotein-associated proteins B and B&apos; [Vitis vinifera]		8.42258	11.5936	13.2477	9.17098	12.1945	13.2761	11.0217	11.3201	4.0388	9.38476	8.51786
EVM0004971	0.818607	cyan	probable WRKY transcription factor 71 [Quercus suber]		27.151	18.0227	58.8918	7.3248	28.7449	24.4373	10.8353	6.58463	0.326467	4.49201	0.584687
EVM0028492	0.727329	cyan	CBS domain-containing protein/Voltage_CLC domain-containing protein [Cephalotus follicularis]		1.7037	3.89842	3.64722	1.29782	3.07835	3.7619	2.24705	2.09996	0.985375	2.82289	1.59914
EVM0018603	0.742571	cyan	PREDICTED: triose phosphate/phosphate translocator, non-green plastid, chloroplastic-like [Nelumbo nucifera]		10.0299	73.8949	63.0503	21.3078	67.1354	58.9032	33.5536	44.1786	3.47475	2.2243	1.02218
EVM0013890	0.912539	cyan	PREDICTED: uncharacterized protein LOC100244229 [Vitis vinifera]		5.08188	6.80491	9.91934	6.40397	7.80811	9.08706	8.26709	8.24004	4.67982	4.74107	4.7344
EVM0023763	0.933198	cyan	PREDICTED: WD repeat-containing protein 11 isoform X2 [Vitis vinifera]		13.6581	27.8779	35.213	20.1747	32.1663	33.3125	23.3023	21.6398	7.71921	8.59904	11.0023
EVM0028068	0.861821	cyan	PREDICTED: uncharacterized protein LOC100854404 [Vitis vinifera]		9.18792	15.3394	17.652	8.32242	14.9952	18.9439	15.5073	13.3604	3.87946	8.54366	4.67067
EVM0028143	0.934829	cyan	peroxidase 12-like [Hevea brasiliensis]		600.756	571.738	1429.42	478.36	1419.92	1708.96	803.793	595.196	154.727	275.887	290.153
EVM0024122	0.873096	cyan	hypothetical protein LSAT_9X108101 [Lactuca sativa]		25.6745	28.5704	42.7303	36.259	47.3493	46.94	33.292	38.4666	18.9703	26.2421	22.6901
EVM0003205	0.558335	cyan	putative MO25-like protein At5g47540 [Hevea brasiliensis]		0.266063	3.08038	2.81022	1.8401	3.21476	1.86009	1.75256	1.06691	2.28928	0.274781	1.29326
EVM0003203	0.760747	cyan	acetolactate synthase 3, chloroplastic [Prunus persica]		68.1284	59.5632	85.5195	64.7485	73.1245	74.6981	78.7898	73.4127	41.1587	42.3826	43.8455
EVM0001616	0.901238	cyan	receptor-like protein kinase [Vitis amurensis]		5.38326	9.7421	21.7617	4.86626	15.5239	14.852	9.89789	6.69226	3.91781	4.4713	2.67467
EVM0026695	0.740216	cyan	PREDICTED: caffeic acid 3-O-methyltransferase 1 [Nelumbo nucifera]		25.9369	54.0647	47.318	22.4637	57.2856	178.416	22.3265	8.1708	0.152637	1.9547	0.137215
EVM0017024	0.799458	cyan	PREDICTED: uncharacterized protein LOC103328135 [Prunus mume]		0.503526	1.20425	1.1751	0.846474	1.89	1.43237	1.39746	1.18224	0.0317583	0.100975	0.0318587
EVM0026344	0.849284	cyan	probable transcriptional regulator SLK2 isoform X1 [Hevea brasiliensis]		40.4807	53.4494	58.4294	45.2838	60.5567	57.7406	53.7532	46.5979	30.0095	29.687	26.2938
Liquidambar_formosana_newGene_12902	0.423852	cyan	#N/A		2.01579	3.75791	3.08769	4.36468	5.97863	2.74257	2.31311	2.54528	1.58919	3.71117	1.63719
EVM0004124	0.783302	cyan	LOW QUALITY PROTEIN: NAD(H) kinase 1-like [Hevea brasiliensis]		5.61661	9.96936	12.523	8.11577	18.1453	19.5406	11.3528	7.3532	4.97924	8.26569	5.06801
EVM0004578	0.766856	cyan	G-type lectin S-receptor-like serine/threonine-protein kinase At5g24080 isoform X1 [Manihot esculenta]		0.250347	8.70175	34.5273	1.44834	13.6568	14.5803	8.37292	6.76507	3.28982	1.10286	0.36999
EVM0022860	0.627213	cyan	hypothetical protein POPTR_006G202700v3 [Populus trichocarpa]		1.6188	3.01828	5.40391	0.894362	3.69144	3.66704	2.45598	1.27643	3.284	1.86632	0.495162
EVM0014946	0.858011	cyan	Glutathione S-transferase tau 7 [Theobroma cacao]		37.7635	30.5589	63.766	14.6778	79.7345	48.9603	17.5573	8.21868	0.047481	10.1165	2.46555
EVM0021100	0.751738	cyan	PREDICTED: U-box domain-containing protein 27 [Vitis vinifera]		29.0804	36.4863	91.2826	24.2451	91.7908	76.578	45.8973	25.717	41.6613	46.9872	18.5501
EVM0020276	0.737616	cyan	PREDICTED: probable polyamine transporter At1g31830 isoform X1 [Vitis vinifera]		0	1.21101	1.55508	0.293179	1.29534	0.686126	1.4118	1.72259	0	0	0.0207697
EVM0016914	0.729486	cyan	PREDICTED: serine/threonine-protein kinase STY17-like [Juglans regia]		18.7686	37.4405	62.9486	28.1691	72.7885	85.2435	51.4259	40.7195	36.8417	46.9572	32.6976
EVM0002955	0.9119	cyan	PREDICTED: plant intracellular Ras-group-related LRR protein 9 [Vitis vinifera]		23.2271	21.9683	31.2304	22.1184	25.1399	25.0522	22.3405	22.5777	10.9731	14.2576	14.8379
EVM0013179	0.797871	cyan	LOW QUALITY PROTEIN: putative receptor protein kinase ZmPK1 [Hevea brasiliensis]		1.14669	1.5341	2.5591	0.683396	2.32291	1.34789	1.03447	1.09878	0.054699	0.0530683	0.139631
EVM0026558	0.790843	cyan	PREDICTED: 7-deoxyloganetin glucosyltransferase-like isoform X1 [Juglans regia]		7.30176	48.5491	95.9953	43.1969	48.5342	35.5463	8.9342	3.09396	0.205145	3.98639	0.063358
EVM0012422	0.841957	cyan	PREDICTED: uncharacterized protein LOC103335657 [Prunus mume]		44.7733	112.583	136.195	68.9882	126.077	132.309	174.696	110.974	12.1262	29.8467	18.6519
EVM0012393	0.600452	cyan	isoliquiritigenin 2&apos;-O-methyltransferase-like isoform X2 [Quercus suber]		69.0985	13.0861	14.9387	5.80045	13.9701	14.019	6.71318	4.25505	1.97114	6.06595	11.3641
EVM0027041	0.818413	cyan	cytokinin riboside 5&apos;-monophosphate phosphoribohydrolase LOG1-like [Hevea brasiliensis]		12.4011	17.5695	96.3734	20.4971	28.2693	29.5909	20.4284	12.4916	0.774079	9.76459	5.01311
EVM0006357	0.848054	cyan	ataxin-7-like protein 3 [Hevea brasiliensis]		27.1027	44.2154	49.0906	34.1717	41.7177	44.7058	46.7592	46.8786	22.547	26.4954	29.6221
EVM0017271	0.899786	cyan	TSL-kinase interacting protein 1 [Hevea brasiliensis]		7.46191	11.3161	15.3895	11.7201	12.6461	12.6629	9.00037	8.54667	2.34935	6.35867	3.56911
EVM0010137	0.818119	cyan	PREDICTED: CDK5RAP3-like protein [Vitis vinifera]		19.5493	24.5777	28.333	21.5542	25.6321	26.4135	28.6345	25.0514	11.5597	16.8472	15.8642
EVM0005928	0.479458	cyan	PREDICTED: uncharacterized protein LOC108171783 [Malus domestica]		30.1256	47.9742	84.6526	44.1605	66.0024	49.8979	48.9984	57.7878	49.0501	50.5876	38.27
EVM0026961	0.817038	cyan	flavonol synthase [Camellia fraterna]		21.757	10.8973	12.0381	8.31335	13.489	16.2323	6.12848	4.4904	0.605279	4.08482	0.178749
EVM0010676	0.871692	cyan	LRR and NB-ARC domains-containing disease resistance protein, putative [Theobroma cacao]		1.42244	2.43517	3.17272	1.62995	2.35994	2.30907	2.06421	2.18089	0.771646	0.270951	0.317823
Liquidambar_formosana_newGene_2065	0.710659	cyan	hypothetical protein POPTR_T085500v3 [Populus trichocarpa]		0.241018	0.142089	2.62421	1.0068	3.7881	1.59932	0.721899	1.19955	0.0433637	1.40854	0.327435
EVM0012210	0.621583	cyan	uncharacterized protein LOC112027604 [Quercus suber]		11.8593	8.44177	21.1839	9.40359	20.5291	12.9296	10.6127	8.86785	13.7506	11.1651	8.46991
Liquidambar_formosana_newGene_1872	0.932991	cyan	allantoinase isoform X2 [Citrus clementina]		11.8815	15.2986	21.2334	12.8143	25.4965	17.3552	14.8862	14.1871	4.62979	8.69259	5.76507
EVM0026008	0.699356	cyan	UPF0481 protein At3g47200 [Prunus avium]		1.52751	2.28774	2.83819	0.696845	3.45194	2.0133	1.73902	1.14019	0.21906	0.473789	0.530251
EVM0017332	0.829179	cyan	probable mannitol dehydrogenase [Prunus avium]		2.87201	3.79611	7.49723	4.87482	8.29058	6.49982	3.12133	2.95942	0.662086	0.910335	0.418689
EVM0019429	0.844182	cyan	PREDICTED: LEAF RUST 10 DISEASE-RESISTANCE LOCUS RECEPTOR-LIKE PROTEIN KINASE-like 2.4 [Vitis vinifera]		3.38097	4.99239	16.0011	3.21332	15.2362	14.982	9.72755	6.48002	3.23603	8.94076	1.89279
EVM0011656	0.870671	cyan	PREDICTED: probable serine/threonine-protein kinase At1g54610 [Theobroma cacao]		1.07102	1.1749	5.16251	1.31933	2.44301	3.19204	1.25721	0.782508	0.0673387	1.09891	0.266063
EVM0015227	0.734299	cyan	hypothetical protein POPTR_010G088900v3 [Populus trichocarpa]		3.74029	6.44015	5.5018	4.76477	5.72185	5.22687	2.06894	1.4939	0.31713	1.03732	0.339039
EVM0027916	0.660912	cyan	trihelix transcription factor GT-3b-like [Quercus suber]		37.5226	47.8807	159.701	37.1087	129.216	118.972	144.069	92.9931	23.473	123.988	36.4245
EVM0013512	0.849372	cyan	PREDICTED: cell division cycle 20.2, cofactor of APC complex-like [Nelumbo nucifera]		0.617952	0.82769	2.54363	0.938255	1.52623	1.20426	0.636929	0.598758	0.426805	0.582768	0.282098
Liquidambar_formosana_newGene_5995	0.739913	cyan	#N/A		0.039761	3.75093	5.08381	2.8345	7.44326	5.16212	4.70409	12.1056	0	0.0355023	0.0192383
EVM0016511	0.867793	cyan	PREDICTED: receptor-like protein kinase 5 [Vitis vinifera]		6.18745	10.7267	14.6125	7.06428	15.3361	12.7725	9.08166	6.54092	1.84337	3.12822	1.33312
EVM0018185	0.885515	cyan	PREDICTED: uncharacterized protein LOC104611870 [Nelumbo nucifera]		5.87608	11.7187	22.5112	8.9579	20.5489	21.7623	20.9082	14.5296	2.96556	9.41292	5.86566
Liquidambar_formosana_newGene_13673	0.734752	cyan	PREDICTED: protein SRC2-like [Vitis vinifera]		32.181	9.02515	48.5888	2.46226	68.4604	13.8003	6.57068	5.2039	0.066767	4.1493	0
EVM0024248	0.558306	cyan	PREDICTED: 7-deoxyloganetic acid glucosyltransferase isoform X2 [Vitis vinifera]		4.21373	21.1458	97.3528	13.6171	69.214	63.11	56.3571	31.0392	56.1875	51.1092	32.1126
EVM0006885	0.817785	cyan	histone H2AX [Morus notabilis]		36.9209	51.8165	90.5101	30.7488	53.562	63.0462	60.7455	45.1305	22.1746	45.5258	21.6184
EVM0008105	0.681399	cyan	uncharacterized protein LOC111988275 [Quercus suber]		23.2298	24.1807	51.1977	5.1656	79.4635	70.1165	38.6856	29.2116	17.5389	2.42279	17.8091
EVM0016593	0.929436	cyan	L-type lectin-domain containing receptor kinase V.9-like [Hevea brasiliensis]		0.827418	2.63716	5.78477	1.21368	4.28286	2.65273	1.30785	0.657389	0.0759887	0.253061	0.0475783
EVM0017429	0.843396	cyan	PREDICTED: uncharacterized protein LOC100251942 isoform X1 [Vitis vinifera]		6.06415	7.35996	16.8605	8.75151	10.0422	10.0262	9.63989	9.3259	1.94847	4.56209	3.15764
EVM0014395	0.823612	cyan	RING-H2 finger protein ATL22-like [Hevea brasiliensis]		4.70231	6.64899	23.5819	6.13202	19.4585	18.3308	11.3312	17.8353	3.6354	11.1617	1.19877
EVM0005034	0.871394	cyan	unnamed protein product [Coffea canephora]		20.4743	27.7118	37.6962	20.7271	30.4103	37.5966	24.8168	14.3566	0.005617	7.69381	0.0241323
EVM0026109	0.756878	cyan	PREDICTED: 15.4 kDa class V heat shock protein [Vitis vinifera]		3.34805	3.02965	11.4712	5.49286	4.72071	8.21489	6.96791	6.77096	2.44046	3.59795	0.715174
Liquidambar_formosana_newGene_13982	0.515683	cyan	transcription factor bHLH3 [Herrania umbratica]		0.408272	1.8155	4.30837	1.662	3.33844	2.59969	3.53639	5.43891	1.87394	3.10392	2.1654
EVM0004078	0.875561	cyan	hypothetical protein CUMW_010350 [Citrus unshiu]		8.88567	10.8676	28.5103	5.99348	17.3994	11.379	7.40875	4.49079	1.21364	7.46938	0.544549
EVM0000975	0.887396	cyan	unnamed protein product, partial [Vitis vinifera]		22.3354	32.7651	47.9472	31.458	35.4515	35.7795	35.7823	38.0957	15.3382	26.8214	20.7134
EVM0011033	0.418154	cyan	hypothetical protein POPTR_0018s02000g [Populus trichocarpa]		5.24597	5.16391	3.84942	2.27386	10.9359	6.49484	4.67236	1.26582	0.00994233	10.9129	0.00871833
EVM0021470	0.747804	cyan	PREDICTED: uncharacterized protein LOC100245830 [Vitis vinifera]		50.6218	79.3423	85.9743	45.8715	147.853	133.176	102.534	91.7019	39.6008	52.5628	37.0119
EVM0021473	0.691679	cyan	LRR and NB-ARC domains-containing disease resistance protein, putative [Theobroma cacao]		4.80596	7.02311	14.3065	9.65113	12.177	10.3404	10.8983	16.2292	7.40889	9.16429	9.51905
EVM0006256	0.73232	cyan	probable serine/threonine-protein kinase abkC [Manihot esculenta]		12.9906	15.9717	34.7407	14.8687	27.31	36.7003	23.1751	22.1746	15.3626	19.3916	15.4064
EVM0008791	0.574112	cyan	PREDICTED: S-adenosylmethionine synthase 1 [Ricinus communis]		257.571	236.693	414.877	241.801	324.053	292.358	288.15	263.363	74.8009	426.723	275.879
EVM0015027	0.908502	cyan	cinnamate 4-hydroxylase [Lonicera japonica]		29.7874	75.7951	124.703	39.8141	176.375	150.69	42.3778	21.0727	0.122334	24.2712	2.86779
EVM0009825	0.795078	cyan	PREDICTED: major allergen Pru ar 1 [Eucalyptus grandis]		2.34941	10.2954	52.9995	4.15554	101.907	89.659	30.6302	22.7768	12.286	25.646	18.9051
Liquidambar_formosana_newGene_6177	0.73049	cyan	germin-like protein subfamily 1 member 20 [Prunus avium]		3.95824	12.9777	32.1594	19.9742	25.3078	14.8546	1.44955	0.676277	0	8.43309	0
EVM0007386	0.791092	cyan	PREDICTED: LEAF RUST 10 DISEASE-RESISTANCE LOCUS RECEPTOR-LIKE PROTEIN KINASE-like 2.7 [Vitis vinifera]		0.609599	0.648016	2.00149	0.0557193	1.47824	1.46658	0.506576	0.845033	0.327378	0.0789213	0.202551
EVM0016519	0.944293	cyan	PREDICTED: tubby-like F-box protein 7 [Vitis vinifera]		65.9623	126.187	170.714	95.2666	176.596	151.078	106.991	100.832	48.3673	76.6761	57.0355
EVM0021294	0.767629	cyan	PREDICTED: cysteine-rich receptor-like protein kinase 3 isoform X1 [Juglans regia]		8.24168	8.6752	27.9598	22.1062	15.2026	15.3595	25.3014	28.1464	3.08176	7.96276	3.24403
EVM0022984	0.811549	cyan	PREDICTED: translocon-associated protein subunit alpha-like [Juglans regia]		73.2107	95.0031	87.8207	76.5587	99.7556	119.8	87.6805	76.1	47.1164	73.9227	48.0901
EVM0022989	0.36635	cyan	PREDICTED: MDIS1-interacting receptor like kinase 2 [Vitis vinifera]		2.4076	0.683933	4.46753	1.69055	1.60828	3.52563	2.93438	4.21047	0.197888	2.51985	3.49486
EVM0012826	0.631036	cyan	PREDICTED: bifunctional aspartate aminotransferase and glutamate/aspartate-prephenate aminotransferase isoform X2 [Vitis vinifera]		44.2741	47.5096	46.6384	48.5709	58.3325	92.166	31.9434	29.5937	20.4884	48.5307	29.8489
EVM0008665	0.735701	cyan	caffeoyl-CoA O-methyltransferase [Vitis vinifera]		207.777	232.098	552.174	235.075	813.4	992.137	388.283	269.196	22.1719	448.992	185.162
EVM0010370	0.850425	cyan	PREDICTED: receptor-like serine/threonine-protein kinase At2g45590 [Solanum tuberosum]		19.93	23.2336	37.5517	29.6697	31.5544	30.5106	32.8398	27.8062	13.945	21.2508	13.8174
EVM0025281	0.846613	cyan	PREDICTED: dr1-associated corepressor isoform X2 [Vitis vinifera]		24.5146	31.237	35.1992	27.3296	52.6905	37.5192	31.4012	23.0487	5.02758	11.4091	11.2684
EVM0003069	0.765966	cyan	PREDICTED: U-box domain-containing protein 4 isoform X2 [Vitis vinifera]		7.03852	4.45705	24.5574	3.88648	12.2983	12.1134	12.6597	9.34635	9.20367	11.7723	4.83278
EVM0001646	0.805428	cyan	probable RNA-binding protein EIF1AD [Hevea brasiliensis]		15.1205	23.6755	27.8593	13.5149	20.5862	33.01	25.6865	19.6345	3.76768	10.3542	8.44356
EVM0001985	0.793241	cyan	G-type lectin S-receptor-like serine/threonine-protein kinase At5g24080 isoform X3 [Manihot esculenta]		0	3.55356	11.9899	2.33878	4.44318	5.21931	3.58868	2.48606	0.90431	0.311368	0.146996
EVM0009071	0.893514	cyan	PREDICTED: protein TIC110, chloroplastic isoform X1 [Vitis vinifera]		10.1129	14.2588	19.9079	13.8845	19.787	18.876	17.2891	16.725	6.06075	6.76872	7.64015
EVM0011825	0.760097	cyan	PREDICTED: uncharacterized protein LOC100249883 [Vitis vinifera]		68.6036	42.2966	72.4163	69.1552	121.666	60.4519	36.2078	34.9389	5.79018	18.3849	19.0414
EVM0019703	0.821394	cyan	hypothetical protein COLO4_32490 [Corchorus olitorius]		90.3787	267.546	240.614	111.008	195.252	252.004	174.177	80.5012	2.92851	18.8789	4.89723
EVM0009501	0.899545	cyan	hypothetical protein COLO4_32490 [Corchorus olitorius]		95.3379	192.964	364.912	122.248	145.574	173.56	157.285	64.5752	3.2132	29.7788	3.53896
EVM0016137	0.819803	cyan	PREDICTED: zinc finger CCCH domain-containing protein 69 isoform X2 [Vitis vinifera]		29.696	37.5179	38.0483	28.4001	36.1067	43.0735	36.6076	35.7134	18.3029	23.1309	20.3334
EVM0013417	0.787796	cyan	PREDICTED: putative high mobility group B protein 11 [Nicotiana sylvestris]		0.417012	6.02843	10.1578	4.12449	13.1737	8.5794	10.754	13.3031	0	0.0630407	0.178032
EVM0020473	0.903729	cyan	PREDICTED: transmembrane protein 230-like [Malus domestica]		55.7202	52.7336	97.5262	51.7141	106.661	95.7787	79.3006	71.345	23.8543	46.6079	41.7474
Liquidambar_formosana_newGene_4064	0.737536	cyan	#N/A		0.078664	1.12261	2.23041	0.196688	0.993394	0.889876	0.653506	0.670898	0.135773	0.161593	0.156962
EVM0002334	0.711142	cyan	uncharacterized protein LOC111992159 [Quercus suber]		24.9158	16.0934	46.2576	12.4793	37.5356	32.2178	12.5261	10.3271	18.5895	25.4653	1.70331
EVM0005645	0.881834	cyan	PREDICTED: probable WRKY transcription factor 7 [Vitis vinifera]		70.9458	132.461	193.277	77.0602	170.775	193.271	156.372	110.383	88.2136	89.9609	60.1468
EVM0012170	0.839196	cyan	hypothetical protein COLO4_06993 [Corchorus olitorius]		0.013736	0.259937	1.77746	0.0820777	5.97853	8.97271	0.430253	0.255443	0.120378	0	0.0219853
EVM0022319	0.582561	cyan	PREDICTED: ethylene-responsive transcription factor 1B [Theobroma cacao]		10.4009	76.5331	117.395	37.5408	211.202	240.308	118.009	84.474	47.0219	36.3252	118.472
EVM0019472	0.934416	cyan	hypothetical protein TorRG33x02_126460 [Trema orientalis]		13.1785	20.1171	63.0966	39.636	56.9423	37.597	34.1967	34.4176	11.5458	18.4018	8.97913
EVM0028436	0.765465	cyan	hypothetical protein POPTR_004G172300v3 [Populus trichocarpa]		18.638	8.69095	25.8128	10.5412	20.332	19.5861	6.55273	5.72723	4.56084	0.826358	2.06938
EVM0002900	0.879704	cyan	PREDICTED: uncharacterized protein LOC109009534 [Juglans regia]		12.977	11.4906	16.5518	10.2289	16.5208	14.9653	11.0795	10.1291	3.18042	7.4084	4.01692
EVM0014344	0.821589	cyan	glutamate receptor 2.9-like [Jatropha curcas]		0.739162	0.276388	2.79983	0.360386	2.43104	3.58689	1.06213	0.814842	0.390172	0.726551	0.560774
EVM0014690	0.883545	cyan	LRR-RLK [Vernicia montana]		16.6333	13.19	46.8593	20.9885	38.1515	23.5629	21.7922	19.5519	9.85813	10.5264	17.3754
EVM0026507	0.861022	cyan	hypothetical protein CUMW_138750 [Citrus unshiu]		30.1337	60.5426	101.358	49.3732	79.3843	86.1317	90.6315	73.9467	19.308	37.5215	27.0172
EVM0010781	0.778258	cyan	Bromodomain 4, putative [Theobroma cacao]		7.01972	7.40212	10.8467	5.4472	15.6972	9.2048	11.6316	11.9091	2.37166	4.21804	4.66883
EVM0019201	0.740698	cyan	aldehyde dehydrogenase 2B7 copy 2 [Bixa orellana]		201.273	197.609	181.501	200.631	228.791	191.856	67.4582	44.1422	4.43477	75.9639	15.3237
EVM0019206	0.743556	cyan	mitochondrial substrate carrier family protein ucpB isoform X1 [Manihot esculenta]		3.16374	7.19827	6.62226	6.42335	6.17945	5.55877	3.04684	2.73307	0.812461	1.95147	0.96724
EVM0011901	0.809394	cyan	PREDICTED: cysteine--tRNA ligase 2, cytoplasmic [Nelumbo nucifera]		0.0113123	0.574092	1.80116	0.885396	2.03224	1.78466	0.53086	0.344711	0	0	0
EVM0002757	0.875462	cyan	hypothetical protein JCGZ_19970 [Jatropha curcas]		5.49711	16.6734	29.3471	7.32832	21.2899	30.4479	12.0504	7.96937	6.84998	5.71629	0.341662
EVM0003641	0.89752	cyan	PREDICTED: phospho-2-dehydro-3-deoxyheptonate aldolase 1, chloroplastic-like [Malus domestica]		139.173	263.26	398.66	213.537	301.761	402.662	223.816	177.363	8.94144	169.154	77.1089
EVM0007738	0.806322	cyan	PREDICTED: protein SRC2-like [Vitis vinifera]		3.84665	2.69104	8.90123	3.7487	8.07652	2.32506	1.29374	1.43227	0.170482	0.400552	0.0261777
EVM0027621	0.714886	cyan	PREDICTED: ethylene-responsive transcription factor ERF095-like [Juglans regia]		0.6177	61.3435	31.0878	34.3419	50.8582	38.9212	15.879	9.22488	0.195794	0.057215	0.0780443
EVM0017365	0.679095	cyan	PREDICTED: LOW QUALITY PROTEIN: uncharacterized protein LOC104590182 [Nelumbo nucifera]		2.59566	0.768024	0.58886	0.091723	0.66985	0.271521	0.126423	0.0596397	0.00819833	0.045566	0.003765
EVM0011003	0.895575	cyan	elongator complex protein 5 isoform X4 [Hevea brasiliensis]		10.7112	13.7154	17.992	8.6517	12.5655	15.5592	11.7963	10.4904	2.94632	6.26061	4.18695
EVM0015270	0.773602	cyan	putative WEB family protein At1g65010, chloroplastic [Quercus suber]		2.22092	2.82766	6.34636	2.69294	5.96928	4.56826	2.69667	1.89314	1.42273	4.65786	1.56247
EVM0020537	0.749652	cyan	mevalonate kinase isoform X1 [Jatropha curcas]		23.02	42.0393	44.6407	20.8782	50.2313	67.7173	19.4685	11.9614	26.3484	18.9634	14.9402
EVM0010977	0.827202	cyan	ammonium transporter 1 member 1-like [Olea europaea var. sylvestris]		29.0993	41.3764	162.336	63.3437	159.151	172.35	83.7814	60.4736	50.3625	77.7846	55.0438
EVM0018544	0.869705	cyan	PREDICTED: uncharacterized protein LOC100266152 isoform X1 [Vitis vinifera]		25.8829	32.4712	39.8328	31.7744	36.0662	37.9555	35.2193	31.2201	14.2666	20.3377	12.87
EVM0013093	0.665713	cyan	hypothetical protein POPTR_006G004000v3 [Populus trichocarpa]		32.008	36.6523	104.01	24.6029	72.7316	76.5263	50.1098	49.9639	58.6313	36.2382	48.8051
EVM0000496	0.698011	cyan	uncharacterized protein LOC112028047 [Quercus suber]		2.80663	3.1823	3.15281	2.11653	2.98846	4.52345	3.67669	3.49169	0.949994	1.11826	1.08936
EVM0002713	0.807381	cyan	PREDICTED: GEM-like protein 4 [Vitis vinifera]		49.1282	80.1013	77.4361	40.8658	85.9456	80.9157	75.3783	50.9719	37.7444	23.7378	9.43459
EVM0027183	0.854726	cyan	uncharacterized protein LOC105636933 isoform X2 [Jatropha curcas]		12.0914	20.2369	26.1724	16.0782	17.806	19.6622	17.9258	14.7514	7.11577	11.7212	5.40198
EVM0014063	0.475368	cyan	unnamed protein product, partial [Vitis vinifera]		9.22131	7.70222	14.2234	9.15597	12.4359	7.45231	6.67562	8.72124	9.12193	11.8452	7.47822
EVM0020096	0.650239	cyan	hypothetical protein BC332_00906 [Capsicum chinense]		5.06437	3.68383	7.49914	2.52565	5.43613	5.51306	3.9955	2.95574	4.38204	2.26847	1.00483
EVM0009859	0.863594	cyan	PREDICTED: ribonuclease 3-like protein 3 [Juglans regia]		6.85815	15.486	60.6671	14.5998	32.567	20.5615	13.6871	11.2921	3.50934	10.1563	0.80355
EVM0004516	0.689263	cyan	polyphenol oxidase, chloroplastic-like [Quercus suber]		380.948	195.592	392.192	228.672	552.81	203.787	68.3951	23.7553	0.290727	73.1574	0.16501
EVM0008172	0.869716	cyan	26S proteasome non-ATPase regulatory subunit 10 [Quercus suber]		24.3927	39.9863	45.8847	30.0414	41.498	53.5544	43.4148	36.9895	10.7243	20.6485	16.9411
EVM0005260	0.824823	cyan	PREDICTED: receptor-like protein kinase 5 [Vitis vinifera]		2.8832	6.20731	6.88617	3.97983	7.81952	6.5638	5.16091	3.5349	0.9337	0.893649	0.631623
EVM0006002	0.879692	cyan	PREDICTED: putative cysteine-rich receptor-like protein kinase 35 isoform X2 [Vitis vinifera]		2.17469	7.03996	22.4404	7.01359	11.6447	10.6293	4.98698	4.55279	2.25687	2.68883	4.29545
EVM0018055	0.938525	cyan	PREDICTED: cysteine-rich receptor-like protein kinase 2 [Vitis vinifera]		5.22582	21.7873	31.5615	17.2931	21.638	33.0598	24.9036	27.9618	3.66222	5.65581	2.05313
EVM0004084	0.832882	cyan	PREDICTED: LOW QUALITY PROTEIN: putative pentatricopeptide repeat-containing protein At1g13630 [Vitis vinifera]		4.82839	5.33519	9.75514	4.91098	6.02101	7.2085	6.57186	7.18177	0.585949	1.9754	2.18012
EVM0004701	0.678615	cyan	PREDICTED: putative B3 domain-containing protein At5g66980 isoform X3 [Vitis vinifera]		4.93011	21.009	17.2358	22.8728	25.4149	13.1403	9.90886	9.01303	2.05212	1.09142	0.905215
EVM0013010	0.81806	cyan	PREDICTED: pentatricopeptide repeat-containing protein At4g20740 [Vitis vinifera]		5.73494	8.6174	16.7922	8.46041	7.87598	9.44371	10.0362	10.9035	1.98669	5.42038	3.29906
EVM0010090	0.599857	cyan	acetyl-CoA acetyltransferase, cytosolic 1 [Hevea brasiliensis]		172.812	286.715	190.882	192.896	315.108	494.397	182.107	119.524	190.534	146.281	118.87
EVM0023455	0.862572	cyan	transcription factor RAX3-like [Durio zibethinus]		35.4392	10.3605	59.3123	12.4386	53.1904	36.1752	26.952	14.9253	0.478593	13.9708	5.08129
EVM0011127	0.623678	cyan	mitochondrial import inner membrane translocase subunit PAM16 like 2-like [Durio zibethinus]		18.3233	30.1467	33.5988	18.2406	42.0556	44.6547	33.7477	28.1687	21.7156	35.6781	19.0516
EVM0010570	0.852859	cyan	glutamate receptor 1.3 [Prunus persica]		0.0163023	4.00609	6.08517	0.735929	5.97065	5.66654	7.53795	9.27278	0.0822353	0.219386	0.0631993
EVM0018426	0.848531	cyan	PREDICTED: zinc finger BED domain-containing protein DAYSLEEPER [Eucalyptus grandis]		9.6248	10.4535	16.2023	12.8097	18.4768	15.6517	12.0003	10.6565	7.73311	10.5573	10.5282
EVM0013190	0.583109	cyan	hypothetical protein POPTR_007G100700v3 [Populus trichocarpa]		13.1709	26.214	23.456	55.1653	87.1623	90.7835	32.8072	24.1264	22.0343	20.2158	2.03295
Liquidambar_formosana_newGene_5646	0.696943	cyan	PREDICTED: branchpoint-bridging protein-like [Malus domestica]		0.037333	0.195956	0.390543	0.173089	0.243677	0.280402	0.376941	0.397423	0.009606	0.076534	0.041073
EVM0008462	0.786705	cyan	G-type lectin S-receptor-like serine/threonine-protein kinase At5g24080 isoform X1 [Manihot esculenta]		0.129716	1.0009	4.39715	0.659788	1.76833	1.94215	1.10739	0.615261	0.373255	0.200836	0.114513
EVM0024536	0.515573	cyan	hypothetical protein PRUPE_3G053100 [Prunus persica]		4.1616	5.64127	15.9542	7.83864	28.7801	19.3499	23.1063	9.80674	5.61342	17.0156	9.98589
EVM0025340	0.914086	cyan	Transmembrane protein [Trema orientalis]		18.9951	19.997	43.0881	19.1803	37.1603	31.919	23.89	25.0511	2.10985	18.2443	9.7751
EVM0025346	0.840405	cyan	PREDICTED: threonine dehydratase biosynthetic, chloroplastic [Prunus mume]		52.3755	77.6884	90.2168	44.2176	100.824	129.932	91.5132	83.8482	22.2434	52.5286	40.6502
EVM0009188	0.783664	cyan	unnamed protein product, partial [Vitis vinifera]		0.706551	1.40907	2.44465	0.405265	2.10041	2.36565	0.634778	0.333922	0.070867	1.19337	0.027833
EVM0004786	0.913794	cyan	PREDICTED: RING-H2 finger protein ATL54 [Vitis vinifera]		49.2231	66.0872	126.507	48.3916	138.996	101.302	78.4248	46.0409	8.27644	35.033	7.42245
EVM0007783	0.797779	cyan	PREDICTED: cellulose synthase-like protein G2 [Vitis vinifera]		1.94337	10.507	15.5514	3.95041	11.6643	33.7913	10.8678	7.28175	3.55966	7.41303	0.125953
EVM0002091	0.719578	cyan	PREDICTED: uncharacterized protein LOC109006727 [Juglans regia]		13.1352	15.6682	19.9775	11.7669	15.8382	18.732	21.4729	21.5789	3.39221	7.14342	6.24387
EVM0027527	0.769032	cyan	phenylalanine ammonia-lyase [Manihot esculenta]		38.0906	20.2255	43.3833	27.3129	24.703	20.0401	9.0147	7.57232	1.97991	13.9327	6.1
EVM0024188	0.615552	cyan	PREDICTED: F-box/LRR-repeat protein 3 [Ricinus communis]		21.0309	10.4302	22.6547	17.9509	14.9296	16.6229	27.4996	18.8214	7.96996	12.26	4.91312
EVM0020252	0.80983	cyan	hypothetical protein CISIN_1g001506mg [Citrus sinensis]		48.2456	55.563	68.0554	57.6418	62.3672	53.1851	62.8882	62.6225	25.8991	35.2521	34.2393
Liquidambar_formosana_newGene_5473	0.686927	cyan	#N/A		0.252329	1.09399	2.29899	1.10977	1.00154	1.61926	2.2828	1.73256	0.199069	0.383918	1.21603
Liquidambar_formosana_newGene_5296	0.762783	cyan	hypothetical protein glysoja_020061 [Glycine soja]		2.59381	2.42675	11.8281	1.20641	18.6029	16.6136	5.85406	2.56342	0	0.234585	0
Liquidambar_formosana_newGene_3293	0.770387	cyan	#N/A		1.01451	1.13857	2.15974	0.809187	2.2289	4.30923	1.20075	0.776605	0.014321	1.72312	0.0667133
EVM0011870	0.810966	cyan	PREDICTED: uncharacterized protein LOC100245830 [Vitis vinifera]		58.7695	93.9866	91.4794	53.3901	132.943	135.069	91.1962	79.004	35.5883	45.3334	37.9581
EVM0019251	0.754336	cyan	PREDICTED: CASP-like protein 4A3 isoform X1 [Vitis vinifera]		21.6889	28.6973	24.8089	16.9126	23.6061	28.6995	23.4041	23.1669	9.8507	12.7075	10.9578
EVM0028087	0.688048	cyan	PREDICTED: kunitz trypsin inhibitor 2-like [Vitis vinifera]		211.977	12.2826	79.5493	15.8225	68.2943	31.1247	14.5504	7.60384	0.0403433	3.71673	0.603167
EVM0006378	0.91669	cyan	probable trehalose-phosphate phosphatase F [Herrania umbratica]		36.7791	34.2054	166.492	46.5832	108.197	87.8269	86.0977	63.443	16.1325	30.2322	9.43836
EVM0026770	0.53882	cyan	PREDICTED: protein EXORDIUM-like 2 [Citrus sinensis]		36.1117	231.016	602.707	113.607	743.377	509.51	522.807	244.592	407.618	295.003	363.948
EVM0011244	0.65721	cyan	PREDICTED: germin-like protein subfamily T member 2 [Prunus mume]		5.57586	4.70624	20.6093	21.6243	19.7694	14.1303	1.0755	0.475105	0	4.32569	0.0731047
EVM0002704	0.848916	cyan	PREDICTED: probable carboxylesterase 15 [Juglans regia]		0.085866	2.1467	10.94	4.75803	9.41944	3.10769	1.66206	0.843347	0.0844827	2.48881	0.264614
EVM0001369	0.819244	cyan	uncharacterized protein LOC110418764 [Herrania umbratica]		3.87819	5.11132	4.92374	2.67177	5.87227	6.08165	4.23118	3.3658	2.43467	2.41147	2.15531
EVM0008503	0.587529	cyan	probable NAD(P)H dehydrogenase (quinone) FQR1-like 1 [Citrus clementina]		55.9149	255.821	249.021	205.595	255.945	309.125	85.6614	51.6963	13.3751	289.682	35.9714
EVM0005093	0.552046	cyan	PREDICTED: uncharacterized protein LOC100265372 [Vitis vinifera]		23.0814	22.7262	43.6201	26.3432	33.3683	34.7731	28.0849	24.9074	30.6825	32.0565	22.75
EVM0021613	0.84665	cyan	polyol transporter 1 [Vitis vinifera]		0	0.148249	1.07186	0.063119	1.02629	0.560958	0.935056	1.33198	0	0.0110547	0.0877377
EVM0024674	0.721992	cyan	peroxidase 5-like [Hevea brasiliensis]		2.41314	2.66711	4.68445	3.88032	3.81742	4.8138	4.65243	5.00818	1.28718	2.31065	1.41956
EVM0027938	0.774371	cyan	major allergen Pru ar 1-like [Quercus suber]		6.53505	5.72217	26.7629	5.35489	58.2089	58.75	18.0893	9.31992	2.2357	4.92899	0.686453
EVM0015046	0.768911	cyan	Glycosyl transferase [Macleaya cordata]		22.2404	31.1886	37.7279	26.8478	44.2142	37.6359	15.3501	14.5822	11.9421	13.5174	13.1002
EVM0002194	0.784291	cyan	uncharacterized protein LOC110630873 isoform X2 [Manihot esculenta]		4.32932	4.70428	7.9763	5.21558	5.44476	6.60182	6.14496	6.15085	1.30498	3.83745	2.92133
EVM0027409	0.879866	cyan	PREDICTED: transcription factor TCP9-like [Nelumbo nucifera]		2.06994	12.409	20.2407	5.92829	14.2359	17.1204	9.99095	5.88572	2.28454	0.737504	1.21142
EVM0010282	0.658525	cyan	PREDICTED: U-box domain-containing protein 21 [Vitis vinifera]		10.5079	32.174	104.446	28.5637	99.307	87.7432	61.7713	26.6572	30.9968	46.6198	16.7119
EVM0021827	0.722109	cyan	G-type lectin S-receptor-like serine/threonine-protein kinase At4g03230 isoform X4 [Cucurbita moschata]		4.00541	6.61076	9.97341	6.34767	6.12139	7.86267	9.33582	8.08884	2.50949	6.0466	5.15036
EVM0002781	0.882703	cyan	mitochondrial substrate carrier family protein B isoform X1 [Morus notabilis]		9.83811	14.1129	24.4578	10.2342	22.197	23.2867	26.0244	17.7095	2.61797	6.46623	4.60755
EVM0021593	0.476661	cyan	PREDICTED: S-adenosylmethionine decarboxylase proenzyme-like [Juglans regia]		36.8896	72.1953	133.965	73.4802	112.102	88.0739	79.6113	88.2298	81.373	95.6644	78.7155
EVM0021271	0.857785	cyan	cysteine-rich receptor-like protein kinase 10 [Citrus clementina]		7.18761	7.07126	15.9932	4.4638	13.3275	7.98524	5.24781	3.78571	2.37602	1.19579	0.409975
EVM0001031	0.795164	cyan	PREDICTED: putative serine/threonine-protein kinase [Citrus sinensis]		16.9042	42.1278	53.4748	43.0163	53.4056	36.47	28.1119	28.7926	24.0175	20.0664	18.7565
EVM0002543	0.783579	cyan	PREDICTED: auxin-responsive protein SAUR71 [Vitis vinifera]		0.233397	2.00261	7.39757	1.40671	14.7741	11.2553	2.47956	1.87355	0.030926	0.500132	0
EVM0026121	0.764058	cyan	homeobox-leucine zipper protein ROC8-like [Hevea brasiliensis]		1.18049	4.26199	8.88993	4.96751	7.2031	5.70409	6.33751	4.17472	0.063878	0.386302	2.20342
EVM0001801	0.867445	cyan	PREDICTED: uncharacterized protein LOC104601164 [Nelumbo nucifera]		6.01011	4.649	19.159	4.77087	15.7013	14.299	11.0922	9.37699	5.16334	9.13515	3.04035
EVM0010901	0.693051	cyan	probable LRR receptor-like serine/threonine-protein kinase At1g74360 isoform X1 [Carica papaya]		2.12658	1.67269	4.13334	1.89903	4.55592	3.93526	2.5925	2.33552	2.9074	1.94599	1.85231
EVM0014486	0.875894	cyan	MDIS1-interacting receptor like kinase 2-like [Hevea brasiliensis]		2.36892	12.2723	37.5678	21.1426	37.3621	33.761	11.4873	7.59279	0.0452163	1.6982	0.0726103
EVM0012771	0.828085	cyan	uncharacterized protein LOC111991661 [Quercus suber]		10.4936	22.8265	39.2184	25.1593	34.0551	22.388	20.0949	20.6867	12.3195	9.00296	11.7385
EVM0023321	0.505813	cyan	uncharacterized protein LOC105650323 [Jatropha curcas]		2.60855	4.41703	14.8056	8.86876	7.69778	9.4305	4.76448	3.65973	0.70916	14.6925	1.10724
EVM0028103	0.814241	cyan	PREDICTED: metal transporter Nramp1 [Ziziphus jujuba]		7.02007	10.2513	27.6188	5.9654	20.2456	22.2025	14.814	13.4235	13.6776	5.86502	8.0728
EVM0001594	0.854209	cyan	farnesyl pyrophosphate synthase [Paeonia lactiflora]		67.8463	99.7986	141.634	54.6523	167.967	193.317	91.2429	59.0776	39.302	81.2429	62.7921
EVM0000246	0.78822	cyan	PREDICTED: U-box domain-containing protein 33 [Vitis vinifera]		10.0682	12.873	19.6943	16.7036	19.8013	15.9802	18.2652	17.7119	12.8085	8.08155	11.5682
EVM0000244	0.833338	cyan	PREDICTED: uncharacterized protein LOC100242886 [Vitis vinifera]		17.4372	16.4512	29.5157	17.4937	16.5262	19.3173	18.4401	16.9773	6.41714	15.0115	8.36383
EVM0009797	0.733641	cyan	PREDICTED: protein FAR1-RELATED SEQUENCE 5-like [Nelumbo nucifera]		4.64157	12.6027	10.523	7.33678	11.8322	11.6546	10.0234	10.6802	2.93066	6.03231	7.06043
EVM0007625	0.673521	cyan	PREDICTED: probable gluconokinase isoform X1 [Juglans regia]		33.8238	16.7356	28.5306	14.3128	25.654	15.0664	14.107	14.7361	2.1506	4.94879	3.13697
EVM0019921	0.82494	cyan	outer envelope protein 61-like isoform X1 [Durio zibethinus]		28.219	24.656	40.1192	30.2492	34.6108	32.1629	29.138	31.2609	18.4286	19.8497	13.9396
EVM0016986	0.87382	cyan	PREDICTED: INO80 complex subunit D isoform X1 [Nelumbo nucifera]		14.1577	15.4635	25.3098	14.5803	21.68	23.169	24.2356	19.0694	3.71946	14.2209	6.26651
EVM0021997	0.816935	cyan	PREDICTED: protein kinase APK1A, chloroplastic [Nelumbo nucifera]		71.9932	130.65	133.121	89.7615	139.524	129.723	71.4414	47.221	15.116	31.2246	10.452
EVM0013275	0.875105	cyan	hypothetical protein GLYMA_07G088700 [Glycine max]		12.0701	19.7989	26.7285	17.5678	22.8904	22.2619	18.5409	16.9136	5.35322	10.1938	9.33118
EVM0009801	0.734961	cyan	PREDICTED: uncharacterized protein LOC104595187 [Nelumbo nucifera]		11.3145	24.6602	35.2787	31.176	33.9621	28.2273	18.109	12.9439	9.49578	17.3155	14.7
EVM0001410	0.682641	cyan	PREDICTED: uncharacterized protein LOC104882483 [Vitis vinifera]		15.3265	13.1404	31.6346	18.9786	30.5523	25.9339	25.1606	16.4454	24.4009	19.8993	9.42308
EVM0005703	0.835201	cyan	PREDICTED: glucan endo-1,3-beta-glucosidase, basic isoform-like [Prunus mume]		0.97614	2.16171	1.59093	0.292584	2.87853	1.7152	0.519445	0.717642	0.033247	0	0.0511237
EVM0016533	0.78768	cyan	Solute_trans_a domain-containing protein, partial [Cephalotus follicularis]		0.222494	57.1665	51.3138	17.9397	102.084	59.4277	46.6869	48.2012	0.00476633	0	0.358866
EVM0019358	0.883165	cyan	PREDICTED: putative E3 ubiquitin-protein ligase RING1a isoform X4 [Vitis vinifera]		9.56903	22.0825	39.8003	19.7141	39.6667	32.8101	27.3089	22.7382	6.24563	8.1289	9.95234
Liquidambar_formosana_newGene_7694	0.63517	cyan	putative disease resistance protein At3g14460 [Quercus suber]		2.50854	4.47675	6.19518	3.80587	5.52276	6.22569	5.41884	5.68104	2.64154	1.19545	2.43471
Liquidambar_formosana_newGene_7692	0.674343	cyan	PREDICTED: protein HAPLESS 2-like [Ziziphus jujuba]		2.77767	3.65174	5.52756	2.97928	2.83834	3.82181	3.84656	4.29832	0.814839	3.06329	2.32523
EVM0006067	0.934629	cyan	PREDICTED: dol-P-Man:Man(5)GlcNAc(2)-PP-Dol alpha-1,3-mannosyltransferase isoform X1 [Ziziphus jujuba]		11.257	13.3072	20.3472	11.3828	18.3324	15.0082	15.9483	16.9581	7.16077	9.10567	8.44281
EVM0025806	0.770259	cyan	PREDICTED: E3 ubiquitin-protein ligase MARCH1 [Vitis vinifera]		26.9721	16.0773	26.2838	22.0429	30.7078	19.4148	18.4194	19.3741	3.95506	15.511	8.331
EVM0023404	0.792927	cyan	PREDICTED: SKI/DACH domain-containing protein 1-like [Juglans regia]		14.5414	13.0057	16.6201	11.5995	17.2865	25.2067	17.2841	12.5464	3.6192	5.58456	4.97253
EVM0009717	0.758308	cyan	galactinol synthase 2-like [Olea europaea var. sylvestris]		1.12741	16.017	92.293	2.79498	42.3312	33.9004	25.694	21.5089	4.68649	9.62214	3.83148
EVM0002148	0.810153	cyan	PREDICTED: cytochrome P450 76C2-like [Vitis vinifera]		10.1781	15.3177	35.2901	5.07985	10.5373	17.5469	15.4069	6.14978	0.227147	0.871711	0.900827
EVM0012435	0.712398	cyan	SurE domain-containing protein [Cephalotus follicularis]		21.7792	16.3638	28.9984	21.6587	22.6604	23.7672	27.422	29.1091	3.32466	21.8174	7.70686
EVM0020417	0.812684	cyan	PREDICTED: RGS domain-containing serine/threonine-protein kinase A isoform X1 [Vitis vinifera]		16.0358	19.1318	51.9382	22.3618	23.6551	24.1965	31.6282	35.438	10.3243	14.3834	8.89884
EVM0025690	0.914287	cyan	PREDICTED: iron-sulfur cluster co-chaperone protein HscB, mitochondrial isoform X1 [Vitis vinifera]		5.01593	7.16131	10.8564	6.85674	8.54298	8.06328	6.26505	6.23694	2.42018	3.1243	2.72831
EVM0018302	0.929717	cyan	PREDICTED: random slug protein 5 [Fragaria vesca subsp. vesca]		22.6017	22.6797	105.992	18.8991	66.5143	81.7202	41.6235	41.8585	5.31376	8.14716	4.86706
EVM0018307	0.822339	cyan	PREDICTED: isoflavone reductase homolog [Nicotiana tomentosiformis]		44.6156	32.4882	75.2167	26.1239	34.3836	34.2294	10.0276	4.61289	0.0536677	12.8103	3.86896
EVM0024044	0.866753	cyan	uncharacterized protein At2g33490 isoform X2 [Prunus persica]		28.2531	44.8392	68.9304	38.6475	75.3207	65.529	50.6856	32.5	38.5983	24.318	25.2409
EVM0003293	0.85926	cyan	heat stress transcription factor A-5 [Quercus suber]		18.9786	16.95	30.2691	19.4724	25.5576	22.8833	21.7308	20.2766	10.6023	18.3552	11.3998
EVM0011640	0.77694	cyan	PREDICTED: UDP-glucose iridoid glucosyltransferase [Theobroma cacao]		37.1352	70.254	132.245	99.8368	147.06	153.589	93.1368	59.7192	29.441	72.8741	24.4615
EVM0000471	0.849783	cyan	PREDICTED: trihelix transcription factor ASIL1 [Vitis vinifera]		6.29624	7.74185	19.709	8.76429	9.03708	9.94932	8.56321	7.80974	1.83072	4.60737	2.88959
EVM0028964	0.864573	cyan	PREDICTED: DIS3-like exonuclease 2 isoform X1 [Vitis vinifera]		12.3784	19.3196	53.2345	20.5588	27.7731	26.9668	29.6936	24.87	12.52	23.9464	11.6944
EVM0019593	0.70798	cyan	hypothetical protein BVC80_1711g32 [Macleaya cordata]		2.12811	6.2049	21.7187	4.39754	12.5392	10.6789	14.1564	14.0185	5.70848	4.73921	7.76465
EVM0019594	0.924466	cyan	uncharacterized protein LOC111989589 [Quercus suber]		5.86176	7.94098	11.6784	8.29841	9.93798	11.6292	8.72537	7.95643	2.14522	5.23481	4.26658
EVM0019181	0.850027	cyan	PREDICTED: GDSL esterase/lipase 1 [Vitis vinifera]		24.3204	15.4762	21.6159	12.7149	40.2965	30.3094	10.7276	4.71728	0.870981	1.65816	0.0524767
EVM0021380	0.902172	cyan	Transferase [Macleaya cordata]		105.469	92.9859	130.616	74.6672	136.191	149.275	73.675	44.7702	1.38734	35.7311	15.8025
EVM0027247	0.918136	cyan	homeobox-leucine zipper protein ROC2-like isoform X1 [Quercus suber]		0.543	1.72629	2.49319	0.981943	2.80472	2.5589	2.16913	0.821506	0.098541	0.06655	0.256275
EVM0027837	0.693587	cyan	protein kinase and PP2C-like domain-containing protein isoform X2 [Quercus suber]		1.52823	2.34546	3.95104	2.42828	3.35291	3.72162	3.22334	4.07564	1.94704	1.68441	2.11238
EVM0005999	0.861376	cyan	PREDICTED: uncharacterized protein LOC102610202 [Citrus sinensis]		15.035	16.9746	23.4189	17.7018	19.5909	22.2947	19.658	16.7396	4.67352	12.7789	8.17324
EVM0014433	0.834382	cyan	PREDICTED: probable transcriptional regulator SLK2 [Ricinus communis]		30.2748	45.3788	44.8654	33.2046	46.5776	46.054	44.5732	35.3444	20.4405	19.4048	19.4372
EVM0016587	0.795015	cyan	histone H2AX [Morus notabilis]		29.0262	38.8708	70.7887	25.6008	43.1801	48.078	38.1464	34.1827	12.6354	36.8302	14.9739
EVM0017185	0.732752	cyan	hypothetical protein VITISV_042631 [Vitis vinifera]		1.97785	9.80994	19.9714	14.175	12.3053	5.34282	1.30027	0.683484	0.356764	5.96773	0.241031
EVM0002894	0.834221	cyan	PREDICTED: uncharacterized protein At1g76070 [Theobroma cacao]		33.2849	30.0438	90.3226	44.6261	77.0138	44.6377	25.0149	15.1413	9.39279	51.1575	2.66651
EVM0028721	0.824422	cyan	PREDICTED: protein DECREASED SIZE EXCLUSION LIMIT 1 isoform X1 [Vitis vinifera]		11.9391	15.8506	17.737	11.1054	14.6489	17.2241	16.8923	16.8361	6.20614	7.66296	9.20191
EVM0012708	0.885739	cyan	PREDICTED: U-box domain-containing protein 11 [Vitis vinifera]		44.8836	33.8412	84.4514	45.9149	97.7449	80.8763	66.1702	60.8738	16.9965	42.2503	34.3614
EVM0003302	0.865681	cyan	Cellular retinaldehyde binding/alpha-tocopherol transport [Trema orientalis]		0.643336	0.730295	2.54549	0.614727	1.43545	1.17983	1.0115	0.99387	0.270265	0.360942	0.593479
EVM0010909	0.866901	cyan	ethylene receptor sensor 4 [Paeonia lactiflora]		20.2144	23.7074	34.9714	26.4975	25.2794	31.4944	28.437	27.9374	12.6643	17.0933	14.4207
EVM0015281	0.584683	cyan	hypothetical protein JCGZ_00739 [Jatropha curcas]		2.75721	2.17065	5.47488	2.45625	3.85585	2.57552	1.79081	1.6819	0.746677	1.82977	3.62125
Liquidambar_formosana_newGene_1901	0.855344	cyan	#N/A		0.283753	0.660188	0.784062	0.377079	0.89808	0.876862	0.774491	0.508389	0.0258967	0.129821	0.16524
EVM0013767	0.758489	cyan	PREDICTED: chorismate synthase 1, chloroplastic [Vitis vinifera]		123.612	142.368	143.172	117.516	163.79	212.724	139.411	125.452	71.7798	134.984	77.9149
EVM0004728	0.862518	cyan	Trehalose-6-phosphate synthase 4 [Betula platyphylla]		44.8989	29.1894	78.6269	8.11168	56.5182	31.5259	21.4932	10.9761	2.02145	12.2184	15.7665
EVM0024418	0.801957	cyan	beta-amyrin 28-oxidase-like [Herrania umbratica]		28.9287	22.4276	43.4975	2.63739	43.6526	33.6949	16.5052	7.49097	0.093467	2.18826	0.237603
EVM0027828	0.665858	cyan	PREDICTED: nudix hydrolase 17, mitochondrial [Malus domestica]		21.453	1.75152	24.9055	6.84018	17.9278	12.937	2.08177	1.46287	1.84453	14.0228	0.565842
EVM0022812	0.870555	cyan	ras-related protein Rab7 [Hevea brasiliensis]		6.40982	13.3683	15.8224	11.6293	13.4488	13.9821	9.18279	9.61414	4.92718	6.90938	4.76012
EVM0009831	0.929854	cyan	PREDICTED: NAC domain-containing protein 72 isoform X1 [Vitis vinifera]		23.4131	33.0233	48.0532	19.617	34.2452	40.8983	33.5582	29.3586	12.1117	12.8006	9.67265
EVM0004533	0.824564	cyan	F-box/kelch-repeat protein At1g16250 [Prunus avium]		3.81682	3.73473	6.4236	3.83116	4.4451	5.31178	4.07889	5.33992	1.76292	2.81329	2.97689
EVM0006398	0.744378	cyan	GDSL esterase/lipase 1-like isoform X1 [Durio zibethinus]		33.5129	1.58079	4.02474	0.395421	3.09913	2.62922	0.82588	0.59797	0.224851	0.05966	0.102575
EVM0013484	0.723342	cyan	PREDICTED: calmodulin-binding receptor-like cytoplasmic kinase 3 isoform X1 [Vitis vinifera]		25.0608	26.8009	45.1201	31.7146	54.4953	62.1513	45.4545	41.9179	16.7082	48.4948	25.0681
EVM0018073	0.650925	cyan	transcription termination factor MTERF8, chloroplastic-like [Quercus suber]		2.47046	1.96494	3.16788	1.96929	2.88738	3.22597	2.7852	2.41329	1.15587	2.49074	1.08303
EVM0020698	0.73919	cyan	PREDICTED: 21 kDa protein [Vitis vinifera]		10.9799	11.5053	28.4627	13.9896	16.1723	3.47858	6.03655	3.455	0	1.98847	0
EVM0024338	0.883334	cyan	myb-related protein 308-like [Durio zibethinus]		47.0152	24.8407	68.7685	21.3801	54.2402	44.0677	45.3991	35.4762	9.87964	21.4929	6.90581
EVM0018501	0.725996	cyan	carboxylesterase 1-like [Quercus suber]		2.32382	5.36591	7.4327	3.31199	16.849	19.8192	8.12813	5.26171	4.68032	3.28143	0.6718
EVM0006603	0.881391	cyan	hypothetical protein VITISV_000884 [Vitis vinifera]		5.15606	18.058	96.7895	17.4554	184.349	165.049	102.337	66.9234	0.371916	16.6168	1.89335
EVM0016208	0.689474	cyan	PREDICTED: probable glutathione S-transferase [Prunus mume]		26.2909	48.5997	30.0193	27.957	49.0867	54.5106	29.5334	22.0085	0.203869	36.0258	0.0333113
EVM0017550	0.791382	cyan	6-phosphogluconate dehydrogenase, decarboxylating 3 [Manihot esculenta]		117.972	160.475	149.374	136.957	177.161	202.863	165.97	125.414	50.9063	132.823	69.648
EVM0001650	0.913551	cyan	PREDICTED: purple acid phosphatase [Vitis vinifera]		13.2578	16.4696	25.469	11.6535	26.2951	25.2911	17.1601	16.8762	4.2089	5.56288	5.66185
EVM0003484	0.929791	cyan	PREDICTED: uncharacterized protein LOC109007538 [Juglans regia]		0.421459	3.35329	3.33066	1.52358	4.40169	3.94513	2.2415	2.22669	0.276063	0.359867	0.300267
EVM0003486	0.905142	cyan	putative disease resistance RPP13-like protein 1 isoform X1 [Hevea brasiliensis]		1.53802	1.70839	4.28987	2.94209	3.69875	2.88142	3.02316	2.40622	1.46238	1.10919	1.22794
EVM0002637	0.848844	cyan	pathogenesis-related genes transcriptional activator PTI5-like [Quercus suber]		17.7968	12.2557	87.0309	28.2328	56.7399	65.0378	42.7974	38.6179	8.78578	25.6093	7.46829
EVM0004103	0.744707	cyan	hypothetical protein VITISV_013219 [Vitis vinifera]		2.8362	8.70209	19.338	4.84279	16.4522	3.90237	4.95196	4.02037	5.44677	1.66189	1.02517
EVM0014088	0.589446	cyan	ATP binding protein, putative [Ricinus communis]		4.67519	10.3219	11.8579	4.69365	24.8616	15.7015	18.3825	11.4937	12.3731	4.47112	5.48279
EVM0014621	0.89648	cyan	PREDICTED: uncharacterized protein LOC105121582 [Populus euphratica]		60.839	80.112	92.0424	67.3224	98.3355	106.796	79.8145	82.5204	32.829	49.3512	43.4838
EVM0014625	0.845232	cyan	PREDICTED: receptor-like protein kinase 5 [Vitis vinifera]		1.97376	3.51371	10.9864	1.45941	6.34305	5.45292	4.10933	2.89408	1.61824	2.13971	3.12586
EVM0018149	0.589547	cyan	PREDICTED: RHOMBOID-like protein 1 [Vitis vinifera]		0.122345	0.500416	0.501923	0.180985	1.15202	1.00885	1.12481	0.481723	0.23437	0.185388	0.448193
EVM0022621	0.783487	cyan	putative serine/threonine-protein kinase [Quercus suber]		16.1867	25.5108	51.0237	17.3059	80.6379	36.3147	27.8096	21.076	0.957875	20.0345	2.18322
EVM0000821	0.831071	cyan	cytochrome P450 CYP749A22-like [Quercus suber]		95.9214	148.689	263.377	228.931	286.968	285.284	264.029	194.512	42.5527	42.4063	6.98816
EVM0008445	0.789362	cyan	metal tolerance protein C2 isoform X1 [Hevea brasiliensis]		15.1527	14.7425	28.3547	20.4957	20.7098	17.8481	13.6581	14.8399	11.4537	16.774	11.5464
EVM0017236	0.859125	cyan	LRR_1 domain-containing protein/LRRNT_2 domain-containing protein/LRR_4 domain-containing protein [Cephalotus follicularis]		18.7581	17.778	49.3678	20.6955	39.5578	30.5699	12.4991	5.98228	0.58009	11.0833	0.623294
EVM0008936	0.856838	cyan	#N/A		7.57068	16.0513	20.0891	12.0668	16.1527	18.8185	21.0411	16.3019	3.08467	3.65595	5.36151
EVM0025362	0.827965	cyan	PREDICTED: acidic leucine-rich nuclear phosphoprotein 32-related protein [Vitis vinifera]		82.8122	92.2733	125.632	95.2387	90.1051	94.2727	119.8	106.448	34.2108	51.4319	41.1639
Liquidambar_formosana_newGene_4074	0.770726	cyan	PREDICTED: uncharacterized protein LOC100245894 [Vitis vinifera]		0.479665	3.99713	5.41189	4.26341	4.82582	2.32808	1.67772	0.667238	0.350286	1.10273	0.124106
EVM0015700	0.634553	cyan	uncharacterized protein LOC110423725 [Herrania umbratica]		12.4686	37.4414	58.7861	23.4492	57.1899	48.4192	26.5558	19.1904	32.413	18.2379	16.5259
EVM0028898	0.878941	cyan	PREDICTED: protein ROOT PRIMORDIUM DEFECTIVE 1 [Vitis vinifera]		4.94562	6.72857	11.9523	7.29704	7.01143	9.18093	8.07804	7.04994	1.21176	2.74178	2.42569
EVM0014860	0.47797	cyan	wall-associated kinase, putative [Ricinus communis]		7.39312	23.9834	23.772	13.8325	19.4182	25.7505	14.1144	15.6463	18.0685	8.86491	21.6688
EVM0027541	0.899327	cyan	PREDICTED: U-box domain-containing protein 17 [Nelumbo nucifera]		28.0371	30.9411	66.8892	35.9365	58.4375	48.2135	47.1217	41.6561	25.0153	31.0975	30.754
EVM0000166	0.802743	cyan	PREDICTED: putative receptor protein kinase ZmPK1 [Vitis vinifera]		1.2814	1.12335	3.57125	0.675745	1.6422	1.2334	0.842186	0.825111	0.096489	0.0769843	0.152371
EVM0003142	0.8162	cyan	cinnamoyl-CoA reductase 1-like [Herrania umbratica]		164.215	320.134	414.148	229.859	352.707	285.136	149.252	114.476	90.225	209.773	63.8058
EVM0018916	0.791111	cyan	elongation factor-like GTPase 1 [Herrania umbratica]		5.68336	7.23813	8.69598	6.94351	7.40357	7.92131	7.81101	6.49209	0.709699	1.87697	1.39275
EVM0010295	0.916805	cyan	hypothetical protein POPTR_0001s15360g [Populus trichocarpa]		0.454476	1.874	4.77952	1.27342	5.72952	4.82875	1.38258	0.854329	0.599346	0.718847	0.050392
EVM0022511	0.831933	cyan	PREDICTED: uncharacterized protein LOC105118604 [Populus euphratica]		0.722815	0.850019	2.46222	1.36943	2.1758	2.19562	2.3755	1.68775	0.530046	0.750753	1.00414
EVM0011424	0.787323	cyan	PREDICTED: ubiquitin carboxyl-terminal hydrolase 24 isoform X1 [Ricinus communis]		37.6138	45.5764	50.4335	42.9593	41.6127	50.0429	34.067	31.1897	23.8283	34.6743	24.5748
EVM0008223	0.751606	cyan	PREDICTED: allene oxide synthase 3-like [Vitis vinifera]		3.57769	47.5604	60.2741	63.099	80.4877	49.6682	37.3766	19.7064	0.0797713	6.45005	0.0476117
EVM0001255	0.753066	cyan	PREDICTED: disease resistance protein RGA2 [Vitis vinifera]		0.0715827	0.145381	0.797291	0.734777	0.503754	0.919994	1.38505	0.490499	0	0.012863	0
EVM0017811	0.412776	cyan	putative ethylene response factor 5 [Vitis aestivalis]		2.56613	9.8922	14.0779	8.42544	23.4014	18.4758	11.6912	7.14064	9.93663	5.19209	14.4357
EVM0023065	0.766928	cyan	PREDICTED: metallothiol transferase FosB [Ricinus communis]		119.912	94.2983	184.701	58.5237	377.005	209.689	214.558	183.394	27.514	22.6337	8.53984
EVM0004610	0.790583	cyan	F-box/kelch-repeat protein At5g60570-like [Manihot esculenta]		63.0131	26.2867	63.3546	51.9322	66.8091	47.7364	37.5025	34.6862	11.5716	50.6482	19.4308
EVM0025059	0.906023	cyan	PREDICTED: phenylalanine ammonia-lyase [Vitis vinifera]		8.57787	33.7426	99.3611	20.6468	90.7091	77.6131	31.2	17.7096	6.91869	30.8366	5.75151
EVM0010402	0.784424	cyan	Chain H family protein [Populus trichocarpa]		0.312447	2.02799	3.0081	1.28546	1.68927	1.05989	0.522384	0.270428	0	0.765145	0
EVM0006456	0.853054	cyan	R3H domain-containing protein 1-like [Manihot esculenta]		54.0656	52.4587	85.7138	65.7665	75.3446	66.1372	64.1438	70.4518	36.8136	65.7903	49.1958
EVM0013555	0.857718	cyan	hypothetical protein VITISV_042276 [Vitis vinifera]		37.9176	49.4092	71.5159	44.3666	60.6209	56.4391	54.244	49.9515	34.6859	51.2822	40.9956
EVM0025242	0.724969	cyan	hypothetical protein CFOL_v3_17497 [Cephalotus follicularis]		3.84446	3.69728	13.9235	4.00994	30.832	13.8829	6.72944	1.58689	2.84958	4.0244	3.65965
EVM0004488	0.886779	cyan	PREDICTED: nicotinate phosphoribosyltransferase 2 isoform X2 [Vitis vinifera]		25.9443	34.9168	54.1912	23.6007	38.6049	42.7277	36.5501	38.051	26.0357	22.8601	15.1974
EVM0026846	0.820149	cyan	PREDICTED: uncharacterized protein LOC102613720 isoform X2 [Citrus sinensis]		2.31243	7.27951	8.67435	4.10783	12.901	8.46027	7.03279	6.16231	0.251399	1.78536	1.40554
EVM0001946	0.846985	cyan	PREDICTED: protein SRC2-like [Vitis vinifera]		41.7516	25.3971	83.8742	20.4731	90.3067	38.1854	27.4959	24.2509	1.46206	9.11053	0.275893
EVM0020855	0.941175	cyan	PREDICTED: uncharacterized protein LOC100250008 isoform X1 [Vitis vinifera]		8.0817	13.7603	18.7574	9.79812	17.6005	15.4948	11.7413	9.04773	0.598114	2.50376	2.84267
EVM0020856	0.527637	cyan	hypothetical protein CFOL_v3_33948 [Cephalotus follicularis]		31.7262	35.9295	61.0885	32.988	54.099	52.4636	39.8962	37.4074	43.353	49.3443	32.9427
EVM0014074	0.788021	cyan	PREDICTED: uncharacterized protein LOC104881559 [Vitis vinifera]		29.8239	22.5424	114.297	24.9001	101.347	86.0705	53.4742	34.5354	54.2973	60.2631	9.8658
EVM0003367	0.861962	cyan	PREDICTED: cyclin-D5-1 [Theobroma cacao]		1.85174	7.35913	14.6136	2.76377	6.81146	6.5253	4.86455	3.10006	0.13654	0.614787	0.599646
EVM0021845	0.866642	cyan	unnamed protein product [Coffea canephora]		0.566719	5.91831	7.73148	3.4849	6.79038	5.22286	4.32039	3.50707	0.564021	0.519206	0.176649
EVM0009324	0.817047	cyan	PREDICTED: feruloyl CoA ortho-hydroxylase 1 [Vitis vinifera]		66.337	42.4839	211.891	30.2748	68.7768	109.209	60.9934	39.9066	0.805623	24.6222	1.20075
EVM0011998	0.783164	cyan	uncharacterized protein LOC112036706 [Quercus suber]		42.0058	71.9979	79.6164	76.4168	101.676	125.777	67.6739	51.0729	12.0117	33.6382	15.1005
EVM0024363	0.848752	cyan	probable pectinesterase/pectinesterase inhibitor 7 [Hevea brasiliensis]		29.3999	66.3681	115.642	53.0615	157.293	77.0288	40.1663	22.2345	2.50487	8.54121	14.317
EVM0029068	0.814838	cyan	probable 26S proteasome regulatory subunit 10B isoform X1 [Hevea brasiliensis]		19.4625	31.8803	39.9998	31.9118	31.3124	36.327	38.0599	32.5543	8.12645	15.4502	13.8935
EVM0027374	0.900421	cyan	hypothetical protein VITISV_005324 [Vitis vinifera]		17.2683	23.0785	36.8129	14.9495	44.3332	38.0454	26.8905	19.4971	15.0602	14.2078	8.31654
EVM0026428	0.750688	cyan	PREDICTED: ribosomal RNA small subunit methyltransferase NEP1-like [Pyrus x bretschneideri]		8.46197	13.3767	10.4079	6.84844	10.2799	15.7756	10.91	8.71755	2.87282	5.72119	5.15678
EVM0021430	0.612819	cyan	PREDICTED: heavy metal-associated isoprenylated plant protein 26 [Vitis vinifera]		0	0.127033	6.98962	0.265203	4.21231	1.13926	0.851547	1.57327	1.14959	0.230632	0.166187
EVM0021432	0.810277	cyan	PREDICTED: myb-like protein J [Pyrus x bretschneideri]		0.0444097	2.7282	4.88533	1.46993	3.23778	1.91935	3.50834	2.56407	1.16219	0.267217	1.23991
EVM0021433	0.81054	cyan	PREDICTED: uncharacterized protein LOC100267997 [Vitis vinifera]		4.45855	5.94108	10.3936	7.81153	9.11943	8.01073	7.71488	7.9006	5.27759	7.47289	5.18501
EVM0018786	0.840433	cyan	unnamed protein product [Coffea canephora]		37.1788	63.834	119.979	42.6543	145.468	140.575	101.788	64.7374	40.996	60.3274	46.5689
EVM0023466	0.879936	cyan	trihelix transcription factor ASIL2-like [Durio zibethinus]		18.4354	24.9335	44.5055	23.0354	30.2386	34.2213	34.1102	29.2611	12.2971	23.2176	13.0319
EVM0028045	0.921257	cyan	hypothetical protein CUMW_076060 [Citrus unshiu]		131.085	62.0438	215.114	75.9407	205.636	186.958	127.23	96.7855	1.53564	78.82	28.4684
Liquidambar_formosana_newGene_7446	0.454612	cyan	PREDICTED: uncharacterized protein LOC109018967 [Juglans regia]		0.830965	2.20193	21.8928	1.1553	11.3408	12.8796	6.38236	3.54859	1.54246	4.48563	8.11621
EVM0015300	0.926651	cyan	PREDICTED: uncharacterized protein LOC100243160 [Vitis vinifera]		1.52598	12.3672	16.9799	7.37539	12.4969	14.8912	12.33	6.10947	0.0360713	0.060093	0.274454
Liquidambar_formosana_newGene_12582	0.792332	cyan	#N/A		0	1.04617	1.19833	0.509618	1.28149	0.89079	1.90051	1.74676	0.0610743	0.025017	0.127595
EVM0018438	0.669079	cyan	protein trichome birefringence-like 8 [Quercus suber]		1.60486	1.79044	4.28063	2.6688	3.57239	1.88031	0.612052	0.464242	0.820219	2.29574	0.425509
EVM0019744	0.828025	cyan	PREDICTED: probable LRR receptor-like serine/threonine-protein kinase At1g34110 isoform X1 [Nicotiana tomentosiformis]		1.13932	1.93573	2.00895	1.14348	2.32436	1.44249	1.25143	1.33922	0.439351	0.204339	0.360188
EVM0010746	0.686564	cyan	Peptidase S8/S53 domain [Macleaya cordata]		0.0685387	0.390049	0.906163	0.239538	0.707048	0.473654	1.18592	0.837692	0.11634	0.361373	0.166088
EVM0008885	0.853085	cyan	PREDICTED: uncharacterized protein LOC100254306 [Vitis vinifera]		2.87742	14.3514	27.9096	9.67116	43.7857	51.5281	24.1333	10.3317	2.09219	6.13624	1.17528
EVM0012498	0.466776	cyan	Heat shock transcription factor B2A, putative [Theobroma cacao]		36.1729	40.0945	103.941	44.5242	88.2376	69.9409	74.4849	72.1779	84.0781	76.4066	56.784
EVM0005187	0.9225	cyan	PREDICTED: PHD finger protein At1g33420 [Vitis vinifera]		37.5255	50.0557	83.2692	52.7227	90.9083	62.3318	73.4273	65.6432	5.85799	19.569	16.6842
EVM0017201	0.745927	cyan	E3 ubiquitin-protein ligase RGLG2 [Sesamum indicum]		45.3577	74.4968	93.1579	80.9675	130.939	112.696	93.3766	92.1346	59.2954	60.208	51.6874
EVM0022944	0.741419	cyan	hypothetical protein CUMW_230160 [Citrus unshiu]		8.02141	4.1433	14.8109	5.66672	6.52286	11.1529	6.81654	4.90364	0.768522	1.29739	6.33456
EVM0004240	0.657102	cyan	lipoxygenase [Camellia sinensis]		0.120642	8.73123	16.3352	0.0673783	11.6275	7.95531	1.21133	0.121711	0.605452	7.86193	0.52389
EVM0019958	0.809644	cyan	PREDICTED: probable WRKY transcription factor 71 [Vitis vinifera]		16.3697	12.0334	30.143	12.7906	29.2527	27.0521	11.6527	11.0222	8.75086	15.3576	1.37497
EVM0026859	0.930089	cyan	protein SHORTAGE IN CHIASMATA 1 [Prunus persica]		0.262579	0.523199	1.12171	0.355579	1.10837	0.566446	0.626385	0.609588	0.0591183	0.192797	0.097283
EVM0000157	0.935965	cyan	ATP-citrate synthase alpha chain protein 1-like isoform X1 [Olea europaea var. sylvestris]		126.602	294.793	433.891	217.348	506.935	652.861	252.396	171.718	48.9985	128.812	51.6855
EVM0009996	0.817562	cyan	PREDICTED: phospholipase D beta 2-like [Juglans regia]		16.8082	21.4545	38.8319	17.5272	35.1649	37.0116	20.9601	27.8316	13.8473	7.4306	3.61069
EVM0015388	0.811379	cyan	PREDICTED: F-box/kelch-repeat protein At3g23880-like [Vitis vinifera]		6.03846	8.73147	12.0379	7.92561	12.3075	9.20586	9.9195	9.28246	3.70154	4.64864	3.34113
EVM0026541	0.864003	cyan	PREDICTED: uncharacterized protein LOC107417659 [Ziziphus jujuba]		7.39555	9.65029	9.56675	7.06994	10.4369	9.56567	7.29116	7.38168	4.61328	5.59434	5.3129
EVM0013834	0.869032	cyan	RING-H2 finger protein ATL11 [Jatropha curcas]		39.2616	16.6962	27.7091	14.3881	20.5996	17.2165	12.2878	10.8587	0.783662	4.99633	1.68392
EVM0019240	0.723269	cyan	BON1-associated protein 2-like [Quercus suber]		3.91719	2.31052	9.83904	8.0607	6.6283	7.92412	2.76168	1.33492	0.473009	2.14839	2.14221
EVM0021321	0.783742	cyan	uncharacterized protein LOC110416442 [Herrania umbratica]		62.8932	59.0689	90.7393	60.4046	81.7864	77.2609	78.8676	79.537	34.4755	50.5532	30.2858
EVM0000698	0.80477	cyan	PREDICTED: dol-P-Man:Man(5)GlcNAc(2)-PP-Dol alpha-1,3-mannosyltransferase isoform X1 [Ziziphus jujuba]		5.7859	6.60123	11.4725	5.15469	8.19642	7.3938	7.16489	8.04479	3.02953	4.61359	5.11261
EVM0000342	0.908555	cyan	hypothetical protein POPTR_0002s04060g [Populus trichocarpa]		31.6375	43.2771	78.0055	58.5385	93.6708	54.5952	47.0459	23.8666	1.82025	16.7479	3.14063
EVM0012992	0.755142	cyan	PREDICTED: ATP-dependent 6-phosphofructokinase 5, chloroplastic-like [Nelumbo nucifera]		1.70161	22.3935	36.7759	12.006	52.0392	44.3534	23.8907	19.4667	19.796	5.55705	4.16301
EVM0013315	0.897134	cyan	PREDICTED: probable pre-mRNA-splicing factor ATP-dependent RNA helicase DEAH2 isoform X1 [Vitis vinifera]		45.1844	65.7251	78.6829	55.5125	66.041	80.7988	55.3886	52.1987	24.9068	37.9281	30.4103
EVM0025338	0.661558	cyan	protein FANTASTIC FOUR 1 [Herrania umbratica]		0.250604	3.21507	5.06605	3.86699	4.60224	2.8274	3.93755	2.27494	3.76323	0.789043	0.452961
EVM0022732	0.720885	cyan	probable WRKY transcription factor 31 [Quercus suber]		45.3583	74.2261	154.552	75.0416	93.1451	107.232	74.0412	59.2915	61.0917	99.9874	63.5394
EVM0024068	0.893768	cyan	PREDICTED: flavonol sulfotransferase-like [Gossypium hirsutum]		8.09	4.04525	21.5701	2.0238	16.1917	12.2331	2.95013	1.85222	0.878486	0.432644	0.360662
EVM0001734	0.770266	cyan	PREDICTED: uncharacterized protein LOC100254107 isoform X2 [Vitis vinifera]		13.343	21.7775	30.7644	39.9987	44.7751	37.9285	30.4749	22.9839	8.29195	21.6616	2.70095
EVM0017328	0.846143	cyan	beta-amyrin 28-oxidase-like [Durio zibethinus]		45.3418	80.2678	216.126	44.528	205.165	176.147	109.598	54.2509	46.9931	73.179	24.0509
EVM0027584	0.905766	cyan	unnamed protein product, partial [Vitis vinifera]		1.36065	3.07538	3.30251	1.52381	3.35695	3.62805	2.56108	1.89551	0.0727473	0.568311	0.580584
EVM0011653	0.844638	cyan	PREDICTED: L-type lectin-domain containing receptor kinase IV.1 [Theobroma cacao]		6.47387	17.819	39.2726	12.9246	41.6115	38.9531	17.247	15.0786	0.679365	0.758784	0.11331
EVM0007959	0.966814	cyan	L-type lectin-domain containing receptor kinase V.9-like [Hevea brasiliensis]		1.87759	3.17165	7.84614	1.8346	6.54327	9.24086	2.82644	2.01135	0.127866	0.217279	0.795927
EVM0007953	0.574309	cyan	PREDICTED: scarecrow-like protein 9 [Vitis vinifera]		21.8973	36.7817	38.8922	30.8046	33.5237	41.234	39.6911	48.0847	22.8353	27.3082	34.186
EVM0021638	0.770835	cyan	PREDICTED: mediator of RNA polymerase II transcription subunit 15a [Vitis vinifera]		9.87746	16.4923	30.5825	13.8766	20.0527	18.9371	18.7044	18.4786	11.9238	14.835	14.7408
EVM0026446	0.849953	cyan	hypothetical protein CUMW_094780 [Citrus unshiu]		0.171	2.11295	3.23555	2.07935	2.91404	2.27436	3.28888	1.75883	0	0.288411	0.0109877
EVM0012072	0.783271	cyan	CBS domain-containing protein/Voltage_CLC domain-containing protein [Cephalotus follicularis]		2.84045	3.99715	6.04337	5.08644	6.16278	5.87456	3.01717	1.69314	0.79719	2.75779	2.53506
EVM0020827	0.793809	cyan	PREDICTED: uncharacterized protein LOC100262813 [Vitis vinifera]		1.90029	2.69634	3.02889	2.6891	3.05178	3.56377	2.49861	2.63986	1.45989	1.73442	1.84338
Liquidambar_formosana_newGene_13667	0.761048	cyan	hypothetical protein CFP56_43958 [Quercus suber]		0	2.78911	3.76383	3.9406	10.1426	4.18697	3.38354	2.93581	0	0.0449887	0
EVM0008225	0.774131	cyan	PREDICTED: ankyrin repeat domain-containing protein 65-like [Vitis vinifera]		13.0782	7.41119	14.9702	5.66283	22.5678	21.6906	14.6691	8.79065	1.63498	13.9196	1.83575
EVM0013398	0.644541	cyan	PREDICTED: double-stranded RNA-binding protein 2 [Vitis vinifera]		27.9742	56.0039	47.7918	44.1889	48.2887	55.6479	45.2462	38.1861	31.8543	35.0573	41.8904
EVM0029057	0.858125	cyan	PREDICTED: NEP1-interacting protein-like 1 [Citrus sinensis]		0.761687	1.41257	10.8287	0.676727	15.7334	13.0089	7.02809	4.44486	0.630878	4.00593	0.33293
EVM0018837	0.441571	cyan	hypothetical protein VITISV_017946 [Vitis vinifera]		57.549	45.5896	82.182	42.1789	75.2058	38.8345	35.8537	32.905	19.5482	59.7891	76.3651
EVM0011986	0.843272	cyan	PREDICTED: acetylornithine aminotransferase, mitochondrial [Nicotiana attenuata]		32.6056	36.0366	46.6099	26.2463	64.4567	58.3779	35.4383	24.6479	14.8016	12.519	21.8846
EVM0011041	0.804503	cyan	Gb:AAF02129.1, putative [Theobroma cacao]		6.81938	7.90754	59.2305	10.835	29.8764	19.0572	5.12322	2.69523	10.9849	1.94392	0.45361
EVM0009140	0.759042	cyan	protein MOTHER of FT and TFL1-like [Quercus suber]		0	11.9502	10.9237	1.06163	27.4169	19.4204	13.7267	13.8666	0.03394	0.0991983	0.0667423
EVM0018201	0.864148	cyan	hypothetical protein PRUPE_1G124300 [Prunus persica]		86.1718	64.8573	113.079	71.3022	79.3998	69.6033	78.9381	82.5495	38.5089	66.98	34.4719
Liquidambar_formosana_newGene_9343	0.81307	turquoise	unnamed protein product, partial [Vitis vinifera]		0.715237	1.93716	1.65515	1.26429	1.86567	1.93126	1.23624	1.27063	0.632324	0.421416	0.461496
Liquidambar_formosana_newGene_9342	0.782715	turquoise	#N/A		2.52717	3.44252	3.53358	2.69579	2.60096	3.87291	1.9724	2.27512	0.757833	1.43115	0.974606
EVM0029343	0.695903	turquoise	Trafficking protein particle complex subunit [Zostera marina]		1.29441	6.8978	8.65668	7.46013	14.1857	8.81918	16.1707	10.3547	1.08599	3.14492	3.39423
EVM0029340	0.83128	turquoise	PREDICTED: nicastrin [Vitis vinifera]		32.9863	35.4935	35.9189	39.9933	40.2636	43.4909	31.8415	32.1883	19.4206	32.0056	21.174
EVM0009066	0.91972	turquoise	putative disease resistance RPP13-like protein 1 [Quercus suber]		2.48055	3.14792	1.92481	3.1221	2.16428	2.3906	2.99609	2.91316	0.477717	0.842687	0.953004
Liquidambar_formosana_newGene_7418	0.687319	turquoise	#N/A		6.11411	4.03948	1.98178	2.7395	3.21807	4.43404	3.36808	2.9735	0.442121	1.3748	1.35515
EVM0000189	0.761936	turquoise	unnamed protein product, partial [Vitis vinifera]		20.3874	37.5086	16.5555	19.158	39.6296	50.6126	37.4868	34.0546	9.88029	11.0667	10.2601
EVM0000234	0.92373	turquoise	Short-chain dehydrogenase/reductase [Trema orientalis]		4.5093	5.80278	5.24556	6.73079	6.4949	6.20589	8.81741	7.33538	0.97287	1.8552	2.95192
EVM0015039	0.825394	turquoise	PREDICTED: uncharacterized protein At2g39910 [Vitis vinifera]		14.4052	13.0714	6.96167	13.1519	10.4646	13.6336	10.2004	10.3754	4.46904	5.65063	7.05774
EVM0012560	0.704929	turquoise	PREDICTED: LOB domain-containing protein 19-like [Ziziphus jujuba]		20.2904	22.4232	19.7503	19.7475	13.7547	8.69434	7.23192	2.37025	0.280759	1.71413	0.225182
EVM0003523	0.840068	turquoise	hypothetical protein VITISV_006652 [Vitis vinifera]		6.5118	7.7341	9.13022	10.0048	6.25538	7.78053	5.28407	6.78764	1.94674	2.38534	4.12351
EVM0003520	0.889141	turquoise	PREDICTED: uncharacterized protein LOC104880466 isoform X2 [Vitis vinifera]		7.59665	25.0904	28.644	28.9275	29.8066	29.772	44.3486	29.2323	0.39388	3.15466	1.9073
EVM0002699	0.901342	turquoise	tRNA dimethylallyltransferase 2-like isoform X1 [Quercus suber]		9.86748	13.5499	12.0149	15.2416	12.871	14.5314	13.0943	11.3998	4.03929	6.58284	7.49349
EVM0002697	0.747132	turquoise	PREDICTED: MADS-box transcription factor 23 [Theobroma cacao]		0.047581	5.08496	3.19971	7.75667	4.96145	3.15807	3.55572	3.80661	0.0702727	0.0223217	0.032027
Liquidambar_formosana_newGene_8759	0.701033	turquoise	#N/A		40.4616	50.9425	50.4691	42.5012	61.2825	74.2427	89.5846	87.2378	23.756	39.1063	26.3493
Liquidambar_formosana_newGene_8756	0.661929	turquoise	#N/A		1.68366	2.90737	1.6986	3.47674	1.39258	1.76987	1.72559	1.79545	0.683636	0.601765	1.05897
EVM0016711	0.748217	turquoise	PREDICTED: BTB/POZ domain-containing protein FBL11 isoform X1 [Vitis vinifera]		9.57112	11.8318	10.8816	15.9817	9.4998	9.94244	10.1782	12.0911	5.47346	6.31511	8.99942
EVM0001915	0.533165	turquoise	Integrase, catalytic core [Corchorus capsularis]		1.14032	0.947405	0.818994	2.26419	0.722797	0.683644	1.56307	2.44379	0.53592	0.570944	0.59571
EVM0001911	0.616237	turquoise	Tau class glutathione transferase GSTU43 [Theobroma cacao]		25.8263	8.01576	10.0632	2.91445	23.7829	17.4969	16.252	16.7412	1.23118	7.72865	1.17275
EVM0001913	0.797881	turquoise	Aldose 1-/Glucose-6-phosphate 1-epimerase [Macleaya cordata]		21.6621	39.2073	38.3548	36.3526	32.0199	33.7844	25.1516	25.6183	10.4824	16.6659	18.4186
EVM0027494	0.809658	turquoise	PREDICTED: uncharacterized protein LOC100260688 [Vitis vinifera]		11.0108	8.59038	11.2031	10.7494	8.81844	9.49393	7.0123	6.48914	2.52204	4.46917	3.84786
Liquidambar_formosana_newGene_14510	0.822514	turquoise	hypothetical protein VITISV_015618 [Vitis vinifera]		0.825498	1.41369	1.3785	1.45406	1.59874	1.52847	1.35554	1.73186	0.717662	0.587448	0.668161
Liquidambar_formosana_newGene_268	0.501163	turquoise	unknown [Zea mays]		0.442909	0.916943	0.46959	1.08916	0.924335	0.596324	0.567874	0.389873	0.326628	0.195491	0.288815
Liquidambar_formosana_newGene_883	0.877733	turquoise	PREDICTED: uncharacterized protein LOC103409892 [Malus domestica]		2.66893	2.71495	3.34349	2.84683	2.85652	2.46002	2.64486	2.68286	0.478327	0.743972	1.50501
EVM0010211	0.593104	turquoise	PREDICTED: pentatricopeptide repeat-containing protein At5g61990, mitochondrial [Vitis vinifera]		5.27091	4.13781	4.34318	5.10318	2.54516	3.3566	2.58739	2.35679	1.22187	1.92527	1.89308
Liquidambar_formosana_newGene_13376	0.897485	turquoise	hypothetical protein VITISV_039780 [Vitis vinifera]		1.05415	2.14849	1.84628	1.69309	1.92014	1.94459	2.03978	2.102	0.300697	0.555634	0.509833
EVM0001580	0.608993	turquoise	D-xylose-proton symporter-like 2 [Hevea brasiliensis]		1.68829	1.90843	1.00907	2.85925	2.48213	2.34705	1.69397	1.82278	0.662976	1.76464	0.990879
EVM0015378	0.843212	turquoise	GDP-Man:Man(3)GlcNAc(2)-PP-Dol alpha-1,2-mannosyltransferase-like [Quercus suber]		19.0241	17.85	22.8162	18.6384	20.8343	21.4702	20.3721	19.8384	7.3973	15.176	13.1094
EVM0015377	0.461884	turquoise	hypothetical protein CISIN_1g034485mg [Citrus sinensis]		18.2817	15.9852	15.4103	8.21817	10.449	22.0941	8.74194	8.13455	6.6914	7.95075	4.78717
EVM0024438	0.76216	turquoise	serine/threonine-protein kinase AFC3 isoform X1 [Manihot esculenta]		24.1047	34.3986	50.7384	36.9216	31.366	33.189	25.2109	22.4861	6.8448	10.7954	10.5953
EVM0020320	0.836578	turquoise	PREDICTED: protein DETOXIFICATION 54 [Nelumbo nucifera]		9.49463	51.4236	40.2691	40.7697	24.1832	20.7255	22.6753	26.0548	0.692222	7.17922	3.03369
EVM0022879	0.838302	turquoise	eukaryotic translation initiation factor 3 subunit A [Hevea brasiliensis]		53.3694	69.6689	52.9138	66.5329	49.8753	61.6347	48.0378	41.0694	14.123	20.8077	21.3532
EVM0022876	0.950695	turquoise	PREDICTED: DNA repair helicase XPD [Vitis vinifera]		17.711	20.8266	17.5781	17.6079	18.3323	23.134	22.2981	20.2526	5.73957	8.45599	8.49507
EVM0018466	0.681142	turquoise	PREDICTED: KH domain-containing protein HEN4 isoform X2 [Vitis vinifera]		32.4913	30.1735	41.732	27.4836	33.2741	29.6772	34.2358	36.363	19.1013	19.8922	20.3435
EVM0016056	0.772877	turquoise	uncharacterized membrane protein At3g27390-like isoform X1 [Quercus suber]		5.63247	18.6979	18.6313	9.74335	16.0069	16.5659	16.5465	20.4539	4.16151	1.93211	4.51498
EVM0013269	0.719373	turquoise	PREDICTED: bifunctional dethiobiotin synthetase/7,8-diamino-pelargonic acid aminotransferase, mitochondrial [Vitis vinifera]		4.01389	5.63485	5.76402	5.84297	4.80814	4.04996	4.11632	4.50512	2.2245	1.72864	2.18136
Liquidambar_formosana_newGene_5328	0.747643	turquoise	reverse transcriptase [Corchorus capsularis]		0.00122733	0.392863	0.518863	0.91141	0.932767	0.426875	0.540195	0.622682	0	0	0
Liquidambar_formosana_newGene_5323	0.792139	turquoise	#N/A		4.86981	4.3635	2.11827	3.13513	2.41561	3.36372	4.4899	3.80518	0.443674	1.34601	1.37313
Liquidambar_formosana_newGene_5327	0.754864	turquoise	uncharacterized protein LOC111995578 [Quercus suber]		0.0690043	4.4703	5.70603	8.62228	11.3699	5.16823	5.96515	5.87393	0	0	0.00697
Liquidambar_formosana_newGene_12924	0.710028	turquoise	#N/A		11.8123	7.17919	10.5275	7.27266	4.84315	6.63364	7.52693	7.74085	1.25789	1.99749	2.10038
EVM0023385	0.707016	turquoise	uncharacterized protein LOC110748391, partial [Prunus avium]		1.05218	3.77513	4.49012	7.78566	5.08803	3.83603	3.58395	4.05829	0.140296	0.56917	0.611395
EVM0009810	0.824919	turquoise	phosphoglycerate mutase-like protein AT74 [Sesamum indicum]		7.25701	10.3804	8.22699	10.7305	11.6367	14.6177	20.1696	21.1836	1.41876	3.67399	4.93161
EVM0009818	0.779094	turquoise	PREDICTED: probable purine permease 11 isoform X2 [Prunus mume]		11.4971	17.6204	16.7933	17.3529	19.3579	20.0754	16.0093	12.7172	7.53389	12.3159	6.62251
EVM0009819	0.623355	turquoise	PREDICTED: MACPF domain-containing protein NSL1 [Vitis vinifera]		24.1236	31.0713	34.8449	19.6507	38.4185	37.0077	33.5174	32.2095	22.1693	19.2024	6.32955
EVM0023913	0.808159	turquoise	sister chromatid cohesion protein pds5 like b-b [Quercus suber]		3.78584	30.95	27.6665	22.894	25.541	22.9038	26.0027	13.0935	1.38646	1.36476	1.79481
Liquidambar_formosana_newGene_7230	0.825463	turquoise	hypothetical protein CUMW_058610 [Citrus unshiu]		1.80162	1.24022	2.0064	1.48805	2.16492	2.24083	2.54142	2.4995	0.203221	0.460917	0.347782
Liquidambar_formosana_newGene_7232	0.625312	turquoise	hypothetical protein PHAVU_001G095900g [Phaseolus vulgaris]		5.29575	3.13266	2.96929	3.98462	2.65611	3.25208	5.61763	3.81835	0.573884	1.8667	3.84721
Liquidambar_formosana_newGene_7234	0.426939	turquoise	hypothetical protein PHAVU_001G095900g [Phaseolus vulgaris]		0.73708	0.423227	0.545041	0.298593	0.716505	0.529667	0.452395	0.742268	0.191246	0.0199773	0.234896
Liquidambar_formosana_newGene_7238	0.75943	turquoise	PREDICTED: putative disease resistance protein RGA1 [Solanum tuberosum]		1.4224	2.06732	2.19718	3.55477	2.03407	1.90403	2.13922	2.93187	0.521476	0.917347	1.38893
Liquidambar_formosana_newGene_4155	0.820887	turquoise	LOW QUALITY PROTEIN: uncharacterized protein LOC110656716 [Hevea brasiliensis]		1.17963	2.07864	2.21119	1.73266	1.98236	2.3439	3.15453	2.23488	0.245782	0.272319	0.479775
Liquidambar_formosana_newGene_1309	0.659817	turquoise	Serine/threonine protein kinase [Parasponia andersonii]		1.20897	1.41262	2.12699	1.5323	1.39628	2.51574	1.66272	1.97737	0.447899	0.750738	1.28007
EVM0009377	0.643335	turquoise	PREDICTED: hydroxyproline O-galactosyltransferase GALT6 [Vitis vinifera]		4.56577	9.42574	6.40715	5.02627	7.86525	8.35923	7.05346	6.84644	0.338511	1.56025	5.71551
EVM0009372	0.619184	turquoise	PREDICTED: acetyl-CoA carboxylase 1 [Vitis vinifera]		15.0028	55.842	32.258	56.6184	53.9359	61.3694	26.2056	26.0657	18.8203	23.6883	17.7525
EVM0001423	0.82193	turquoise	rRNA-processing protein fcf2 [Quercus suber]		1.68219	1.82097	1.62173	1.8415	3.00856	3.22057	2.38234	2.14239	0.249158	0.751659	0.920389
EVM0015179	0.783781	turquoise	PREDICTED: uncharacterized protein LOC108991270 [Juglans regia]		10.8	14.9468	14.1719	14.3332	10.1386	10.3566	10.0962	8.85843	4.66705	4.77039	6.56671
EVM0014594	0.934602	turquoise	PREDICTED: protein RNA-directed DNA methylation 3 isoform X4 [Vitis vinifera]		7.71761	12.1832	9.05137	13.0259	9.22506	12.2362	14.608	14.54	1.93121	3.46856	4.90816
EVM0009593	0.837505	turquoise	PREDICTED: uncharacterized protein LOC109002109 [Juglans regia]		45.3817	31.7373	41.7334	27.3636	32.7818	35.5393	33.8457	33.068	11.3731	22.3171	10.4065
EVM0004550	0.894591	turquoise	PREDICTED: glycosyltransferase family protein 64 C3 [Juglans regia]		11.0436	10.2024	12.7557	13.4126	13.3949	12.6878	11.4561	14.0838	3.42159	6.0537	5.55756
EVM0008420	0.914507	turquoise	PREDICTED: uncharacterized protein LOC100265975 [Vitis vinifera]		7.84842	11.2265	9.53358	11.3974	9.62774	10.8038	12.2129	11.9663	4.95343	3.86277	5.99969
EVM0008425	0.442522	turquoise	uncharacterized protein At3g03773 isoform X2 [Durio zibethinus]		8.01286	24.8531	17.4997	11.238	28.4254	28.5712	30.8361	21.1537	10.9112	8.96195	23.1359
EVM0012334	0.683218	turquoise	protein PPLZ12 [Sesamum indicum]		61.6909	89.5443	56.1396	58.9163	126.782	125.532	149.925	137.568	24.8611	46.5248	27.3243
EVM0012339	0.683149	turquoise	Sensory transduction histidine kinase, putative isoform 1 [Theobroma cacao]		32.8553	37.5426	39.2955	59.9598	37.9556	31.4662	37.1402	46.8047	19.0489	37.292	30.5573
EVM0012338	0.581296	turquoise	PREDICTED: 50S ribosomal protein L21, mitochondrial-like [Pyrus x bretschneideri]		28.7014	27.6069	25.2294	16.8241	15.9025	24.7192	17.5015	14.7032	7.98713	12.3401	8.40719
EVM0005730	0.803895	turquoise	PREDICTED: cyclin-dependent kinase C-2-like [Ziziphus jujuba]		21.5955	24.41	20.3747	19.7329	25.7349	28.2543	25.2249	25.3906	12.5078	19.4463	16.5013
EVM0024318	0.846321	turquoise	tetratricopeptide repeat protein 33 isoform X2 [Durio zibethinus]		16.2271	22.8058	19.1839	17.0771	25.1047	25.2906	22.6324	22.3055	7.15336	11.5361	10.0548
EVM0005736	0.657257	turquoise	transcription termination factor MTERF2, chloroplastic-like [Quercus suber]		2.83508	2.83234	4.4795	3.47233	2.40769	3.96445	2.59914	2.571	0.8854	1.66859	1.23185
EVM0007392	0.776571	turquoise	replication protein A 70 kDa DNA-binding subunit B-like [Lactuca sativa]		6.73333	7.53831	13.9914	8.59199	7.53941	8.31616	8.31274	8.21627	1.33435	3.90832	3.4059
EVM0027755	0.744538	turquoise	hypothetical protein VITISV_018886 [Vitis vinifera]		9.74246	12.6824	12.1828	17.4655	12.2339	13.0699	14.3813	15.0164	6.02721	10.5423	11.9571
EVM0022221	0.542604	turquoise	PREDICTED: uncharacterized protein LOC104598060 [Nelumbo nucifera]		20.7626	29.2098	50.9885	39.1668	57.9037	62.2626	76.2446	81.1619	35.9502	28.2451	15.3334
EVM0007805	0.532438	turquoise	protein MNN4 isoform X1 [Sesamum indicum]		21.0789	27.6414	30.4995	18.675	15.181	24.7746	20.9293	17.0375	8.38796	18.7753	11.5644
EVM0026936	0.771968	turquoise	PREDICTED: inner centromere protein isoform X5 [Vitis vinifera]		4.2483	4.08093	3.26027	4.13765	3.45704	5.39592	2.82154	3.05087	1.76552	1.0533	2.19401
EVM0021753	0.748592	turquoise	PREDICTED: uncharacterized protein LOC100248343 [Vitis vinifera]		15.6504	33.3037	17.2142	23.5299	38.3906	45.2487	37.4494	38.9251	10.3629	11.3051	10.0403
EVM0021752	0.827683	turquoise	unnamed protein product, partial [Vitis vinifera]		162.808	188.156	108.954	163.071	151.736	170.34	186.144	196.919	72.635	83.007	117.469
EVM0021759	0.697632	turquoise	PREDICTED: pentatricopeptide repeat-containing protein At1g79490, mitochondrial isoform X2 [Juglans regia]		6.91734	8.72267	7.74233	9.50865	6.64374	7.85138	7.66281	8.01177	4.67238	5.58637	4.68198
EVM0021758	0.679082	turquoise	PREDICTED: uncharacterized protein LOC100247238 [Vitis vinifera]		57.7973	63.2956	38.5854	57.9693	72.5567	63.713	63.7345	64.1464	41.2129	36.9262	24.8313
Liquidambar_formosana_newGene_12678	0.76809	turquoise	PREDICTED: uncharacterized protein LOC104085226 [Nicotiana tomentosiformis]		3.72338	2.77544	2.88479	3.57088	2.69287	2.99587	2.85906	2.17708	0.765205	1.46042	1.68403
EVM0025991	0.733938	turquoise	PREDICTED: uncharacterized protein LOC103329490 [Prunus mume]		34.8765	60.5064	49.3836	36.9775	42.2491	48.4395	43.3538	39.7653	21.2015	23.2486	13.9484
EVM0021286	0.749727	turquoise	PREDICTED: prolyl endopeptidase isoform X1 [Vitis vinifera]		11.3221	15.8178	14.2662	17.4564	9.98938	9.59663	8.78605	9.93792	2.70464	7.4233	5.6465
EVM0020486	0.784793	turquoise	PREDICTED: mitochondrial inner membrane protease ATP23 [Nelumbo nucifera]		14.7347	15.6712	14.791	14.7417	9.8292	13.3528	12.6933	11.6071	4.46073	9.1394	8.35967
EVM0020480	0.367201	turquoise	oligopeptide transporter 4-like [Hevea brasiliensis]		0.497011	1.19203	0.437971	0.812868	2.89398	6.32796	2.10585	2.57795	1.26051	1.11763	1.10555
EVM0023662	0.945738	turquoise	phosphatidylinositol 4-phosphate 5-kinase 6-like [Ananas comosus]		1.90333	2.83637	2.32857	3.0195	1.93625	2.9837	2.27122	2.34231	0.242044	0.480149	1.06899
EVM0023667	0.66301	turquoise	hypothetical protein PRUPE_2G241600 [Prunus persica]		2.89826	2.82284	7.0089	3.14022	4.73218	3.91369	4.39745	2.94199	0.628019	1.82413	1.61427
EVM0020150	0.72616	turquoise	PREDICTED: pentatricopeptide repeat-containing protein At1g32415, mitochondrial [Vitis vinifera]		9.21752	11.6655	8.80077	9.8352	8.81834	8.76031	7.72018	7.0896	3.39317	5.33497	5.48918
EVM0020156	0.933264	turquoise	PREDICTED: uncharacterized protein LOC108996956 [Juglans regia]		9.14661	8.7016	7.79097	10.0049	7.99659	9.27711	9.88326	9.9288	3.65055	3.83247	3.54607
EVM0023599	0.521745	turquoise	PREDICTED: uncharacterized protein LOC100250039 isoform X3 [Vitis vinifera]		16.1851	22.4548	11.2906	18.5629	16.6491	15.3936	18.9492	17.987	12.5581	15.5925	15.0479
Liquidambar_formosana_newGene_11599	0.780686	turquoise	OTU domain-containing protein At3g57810 [Quercus suber]		2.08031	5.09179	2.59613	5.22311	3.16701	4.30985	3.90412	2.93415	0.428053	0.51561	1.11082
Liquidambar_formosana_newGene_13992	0.515965	turquoise	#N/A		0.308839	0.233425	0.504543	0.588193	0.54364	1.06462	1.09003	0.752733	0.054476	0.580816	0.065422
EVM0018871	0.571506	turquoise	PREDICTED: two-component response regulator ARR17 isoform X1 [Vitis vinifera]		0.285966	14.4951	4.35897	5.3822	30.9895	43.9731	54.7439	52.2169	0.321231	0.108244	0.625343
Liquidambar_formosana_newGene_5099	0.748586	turquoise	#N/A		3.27428	4.06266	2.40763	5.09222	2.9792	1.85994	3.83996	3.33619	0.550957	0.719536	1.1153
Liquidambar_formosana_newGene_3118	0.631507	turquoise	#N/A		0.787005	1.00501	0.765444	1.85028	0.61428	0.994674	1.77977	1.11696	0.0295317	0.579939	0.816898
Liquidambar_formosana_newGene_3112	0.706591	turquoise	zinc finger protein 346 [Quercus suber]		4.56071	6.25727	2.78372	4.47345	3.08914	4.2193	4.2144	4.13586	1.56492	1.68541	1.96255
EVM0002836	0.844039	turquoise	PREDICTED: CLK4-associating serine/arginine rich protein [Vitis vinifera]		42.162	47.2076	43.7105	54.2263	43.6044	36.5622	40.5426	43.4384	14.8395	15.6952	26.4453
EVM0002832	0.835143	turquoise	PREDICTED: putative receptor-like protein kinase At3g47110 [Vitis vinifera]		1.02746	1.85126	1.92188	2.60465	1.31832	1.82456	1.47798	1.64472	0.199113	0.352074	0.585086
EVM0002838	0.887463	turquoise	hypothetical protein CISIN_1g004488mg [Citrus sinensis]		5.24982	4.19437	4.76225	5.65188	4.36025	4.90117	6.03137	4.35753	1.03666	2.0743	2.17644
EVM0017949	0.679565	turquoise	PREDICTED: uncharacterized protein LOC104609040 [Nelumbo nucifera]		50.3154	46.2456	60.4972	59.8154	47.4098	44.795	61.5	75.4691	42.6758	39.1038	34.0966
EVM0017940	0.711809	turquoise	unnamed protein product, partial [Vitis vinifera]		87.0559	91.1888	52.7866	76.0467	88.4821	98.2448	92.6864	93.2218	53.107	61.0099	62.577
EVM0014410	0.79925	turquoise	F-box domain containing protein [Parasponia andersonii]		23.7137	22.6229	30.6612	24.9054	19.4233	23.3631	20.2657	17.8808	8.48329	10.9333	6.63245
EVM0006992	0.831334	turquoise	PREDICTED: splicing factor 3B subunit 3 [Vitis vinifera]		32.9472	44.1881	31.0254	39.1859	32.1363	41.5624	35.4973	33.2967	14.2748	17.1174	21.0617
EVM0006666	0.81584	turquoise	PREDICTED: uncharacterized protein LOC100257388 [Vitis vinifera]		13.7467	16.2189	16.116	16.4177	12.6506	15.3703	12.4896	14.2901	5.40473	6.15133	8.28664
EVM0006660	0.723792	turquoise	PREDICTED: putative pentatricopeptide repeat-containing protein At1g31840 [Vitis vinifera]		1.51158	1.76473	1.72314	2.15078	1.17681	1.67368	1.35418	1.63083	0.804934	0.78414	1.04634
EVM0006661	0.775468	turquoise	uncharacterized protein LOC110638946 isoform X1 [Hevea brasiliensis]		106.422	116.544	48.0917	116.428	133.307	172.184	165.937	115.763	29.8357	63.5797	12.4078
EVM0003012	0.694741	turquoise	aldehyde dehydrogenase family 3 member F1 [Prunus avium]		0.178609	54.0003	19.9455	45.3496	34.6731	48.1427	46.9723	45.1848	21.4086	0.0190223	7.12428
EVM0004746	0.606447	turquoise	PREDICTED: LOW QUALITY PROTEIN: putative disease resistance protein At1g50180 [Vitis vinifera]		0.957322	5.94205	2.55297	5.06991	2.09273	1.65377	1.56207	1.67223	0.0258407	0.145388	0.0857643
EVM0028165	0.7085	turquoise	PREDICTED: dnaJ homolog subfamily B member 7-like isoform X1 [Pyrus x bretschneideri]		12.1723	22.1887	50.7451	55.6992	46.7474	40.8442	34.3598	36.1764	11.991	22.3696	5.15877
EVM0012106	0.811686	turquoise	probable complex I intermediate-associated protein 30 isoform X1 [Hevea brasiliensis]		6.49055	11.7457	6.2534	7.16111	7.85255	10.5137	8.46269	9.30917	4.81057	3.80662	4.71233
EVM0003905	0.8314	turquoise	60S ribosomal protein L18a-like protein [Herrania umbratica]		19.6933	21.044	14.0003	20.3915	22.2782	19.5659	28.5842	39.2648	5.07199	11.2981	6.48995
EVM0007212	0.700383	turquoise	bidirectional sugar transporter SWEET4 [Jatropha curcas]		0.132517	8.71167	9.83252	11.2187	10.4794	24.5544	18.85	18.3609	0.0423817	0.281626	0.716057
EVM0028831	0.764491	turquoise	hypothetical protein COLO4_17092 [Corchorus olitorius]		72.285	117.359	70.9497	70.3722	81.0294	82.6014	84.3968	70.0612	35.8323	75.1746	40.2023
EVM0026470	0.733726	turquoise	protein TRAUCO isoform X2 [Durio zibethinus]		8.37427	9.68024	10.9184	10.8727	9.59186	11.8114	8.92191	8.44221	4.81314	6.77493	7.21239
EVM0017686	0.820758	turquoise	serine/threonine-protein kinase CTR1 isoform X1 [Quercus suber]		30.8689	29.8871	26.5374	31.1599	28.4694	33.9888	28.2636	28.803	12.8256	22.9234	18.9558
EVM0014883	0.917284	turquoise	luminal-binding protein 5 [Quercus suber]		6.49765	12.5951	6.95086	11.4129	10.3847	13.9092	10.6204	11.0577	2.35276	2.08411	3.04505
EVM0022388	0.523037	turquoise	PREDICTED: probable transmembrane GTPase FZO-like, chloroplastic isoform X1 [Vitis vinifera]		11.0907	16.0402	20.5252	15.2469	30.4463	26.3763	29.6922	30.9007	19.7953	6.17091	12.3161
Liquidambar_formosana_newGene_13712	0.744828	turquoise	#N/A		2.37145	3.8665	0.597982	4.02962	1.92749	1.65411	2.43502	3.23561	0.036576	0.173092	0.636776
Liquidambar_formosana_newGene_13713	0.772202	turquoise	#N/A		2.3761	2.76773	1.95957	3.18871	1.67731	1.39267	2.21373	2.60549	0.34508	0.373462	0.799053
EVM0029126	0.645576	turquoise	transcriptional corepressor LEUNIG-like isoform X1 [Quercus suber]		0.309611	7.71386	8.95662	16.7864	14.887	8.93699	8.58347	11.7994	0.123584	0.123462	0.792006
EVM0019154	0.737455	turquoise	PREDICTED: probable polygalacturonase [Vitis vinifera]		127.2	159.334	134.926	190.433	112.906	85.894	51.0618	39.9592	3.83645	12.4472	22.9066
EVM0019155	0.346525	turquoise	unnamed protein product, partial [Vitis vinifera]		6.01476	9.98881	8.14751	5.25695	6.44153	7.74701	5.28553	4.42302	4.80798	3.31586	5.60601
EVM0025813	0.648028	turquoise	hypothetical protein POPTR_012G102400v3 [Populus trichocarpa]		1.00201	16.8997	21.8217	15.9334	18.8865	21.436	5.26528	2.06221	0	0.334784	0
EVM0025819	0.895225	turquoise	PREDICTED: uncharacterized protein LOC100242314 [Vitis vinifera]		9.64183	13.8697	12.662	11.7433	10.8814	12.0273	10.9448	10.8985	3.85171	5.1278	5.41698
EVM0021121	0.843521	turquoise	PREDICTED: U2 small nuclear ribonucleoprotein B&apos;&apos; 2 [Vitis vinifera]		41.6752	71.9565	50.2537	51.7278	54.564	76.7301	64.1683	51.4978	31.9998	36.6009	30.9483
EVM0028448	0.971153	turquoise	PREDICTED: aldo-keto reductase family 4 member C9 [Ricinus communis]		13.236	18.1063	14.5825	17.1177	14.2993	14.9084	15.1221	16.3312	1.63018	7.04896	5.20172
EVM0000103	0.739388	turquoise	#N/A		0.274391	133.923	42.187	41.8775	121.3	138.847	74.2703	50.6449	0	0	1.15228
EVM0009705	0.583645	turquoise	PREDICTED: nuclear transcription factor Y subunit C-1 [Cucumis melo]		69.3807	87.9011	46.4183	68.8658	71.5769	82.6721	87.1288	84.6257	64.4597	44.5982	43.3797
EVM0008072	0.849328	turquoise	protein VASCULAR ASSOCIATED DEATH 1, chloroplastic-like [Carica papaya]		8.56168	9.34669	12.2987	9.83372	12.3914	12.6663	14.0274	11.6868	2.73855	5.821	6.01413
EVM0006503	0.850076	turquoise	PREDICTED: DNA polymerase epsilon subunit B isoform X1 [Vitis vinifera]		6.27586	7.17959	6.37061	4.79917	6.70823	5.79686	6.08115	6.72226	1.40602	1.20789	2.67558
EVM0016784	0.716758	turquoise	RNA-binding protein Musashi homolog 2 isoform X2 [Quercus suber]		74.4641	79.038	84.661	63.1292	83.1038	87.8446	97.0945	97.1253	51.6239	58.2127	61.8048
EVM0016786	0.915265	turquoise	serine/threonine-protein kinase/endoribonuclease IRE1a isoform X2 [Arachis duranensis]		7.60956	8.52224	7.72798	9.66834	8.20965	8.58993	8.07137	8.79165	1.68483	3.41437	4.08099
EVM0011849	0.814315	turquoise	Bud13 domain-containing protein [Cephalotus follicularis]		20.2331	20.3138	23.0629	16.9097	24.0644	27.2472	29.731	31.9834	5.48096	13.1292	17.0197
EVM0001995	0.8962	turquoise	--		0.613667	1.1122	0.666316	1.19436	0.917907	0.739673	1.25048	1.74141	0	0.0974527	0.142738
EVM0001993	0.717497	turquoise	uncharacterized protein LOC112024342 [Quercus suber]		25.6058	29.9135	25.4947	22.4904	29.3503	31.5453	32.1081	31.0355	13.6595	25.7785	22.219
EVM0002971	0.759593	turquoise	gamma-tubulin complex component 4 homolog [Hevea brasiliensis]		11.4065	17.177	16.6084	16.0002	12.1461	14.3713	12.9801	12.5343	4.08775	8.06053	10.3348
EVM0002974	0.645164	turquoise	hypothetical protein POPTR_0006s05820g [Populus trichocarpa]		16.7304	13.2957	12.6151	8.74104	10.0194	11.3071	11.5246	8.76731	1.9229	5.93572	4.11207
EVM0002979	0.885331	turquoise	PREDICTED: uncharacterized protein LOC100252268 [Vitis vinifera]		34.5092	46.3796	30.0915	32.9331	36.7186	50.0027	35.935	30.2365	14.9304	22.0535	17.6817
EVM0014605	0.673101	turquoise	outer envelope pore protein 24B, chloroplastic-like isoform X1 [Hevea brasiliensis]		41.5682	182.825	131.764	78.9376	284.954	188.441	232.988	247.398	29.7283	34.2495	26.7449
EVM0018182	0.783989	turquoise	Arf domain-containing protein [Cephalotus follicularis]		418.816	524.682	296.921	351.904	374.546	441.537	336.984	346.003	135.9	268.772	222.611
EVM0028282	0.85144	turquoise	PREDICTED: DNA mismatch repair protein MSH6 [Vitis vinifera]		14.596	12.3026	11.4619	14.5981	11.5958	10.8868	13.1523	13.6129	3.84986	4.96653	9.23082
EVM0018188	0.796325	turquoise	hypothetical protein VITISV_006349 [Vitis vinifera]		3.70467	3.59731	3.48054	4.2882	3.36542	3.98152	4.68917	4.91974	2.44295	3.09866	3.0933
EVM0023161	0.767101	turquoise	PREDICTED: uncharacterized protein LOC103930936 [Pyrus x bretschneideri]		22.3081	28.3865	17.9471	25.5378	29.0757	35.349	34.3501	37.0801	14.6934	14.9115	19.875
EVM0023167	0.603613	turquoise	uncharacterized protein LOC111997465 isoform X2 [Quercus suber]		12.3888	30.1206	20.1366	11.3287	63.7318	54.0305	58.9654	55.363	7.65881	7.02169	12.2515
EVM0011837	0.484031	turquoise	thaumatin-like protein 1 [Quercus suber]		10.8256	38.43	213.575	29.0936	98.997	95.0002	211.036	182.666	22.6162	62.6288	3.2042
EVM0004463	0.74549	turquoise	hypothetical protein CRG98_001737 [Punica granatum]		3.34872	3.86544	3.63174	5.80735	3.23907	3.13612	2.45643	3.42014	1.01658	1.25563	1.61626
EVM0002154	0.824432	turquoise	PREDICTED: lysine-specific histone demethylase 1 homolog 2 [Juglans regia]		8.49694	11.2639	12.0427	12.4795	8.94016	10.3269	8.22414	8.13439	2.48991	3.48495	3.63325
EVM0019735	0.659092	turquoise	PREDICTED: probable serine/threonine-protein kinase WNK9 [Vitis vinifera]		5.12401	7.45444	22.2273	13.156	6.01958	9.21044	9.74836	12.1943	2.54089	0.860373	3.63059
EVM0017729	0.576441	turquoise	L-type lectin-domain containing receptor kinase IV.1-like [Manihot esculenta]		0.439551	0.447895	1.02823	0.440077	0.464327	0.590705	0.209749	0.308461	0.166555	0.02144	0
Liquidambar_formosana_newGene_13030	0.730796	turquoise	#N/A		3.3987	2.99457	2.21961	3.36049	1.79228	1.7563	2.57939	3.14698	0.95323	1.49119	1.03748
EVM0023994	0.862122	turquoise	PREDICTED: serine carboxypeptidase-like 17 [Juglans regia]		11.4846	22.246	10.3296	16.9106	13.1571	16.8457	14.6533	12.607	1.93558	3.80407	6.19662
EVM0018127	0.753677	turquoise	PREDICTED: dephospho-CoA kinase [Vitis vinifera]		17.0763	21.6033	24.5558	29.6188	18.6625	17.8442	14.1122	11.6446	4.04947	8.21626	6.80193
EVM0011448	0.725916	turquoise	PREDICTED: uricase-2 isozyme 2 [Juglans regia]		186.575	174.036	101.521	121.116	164.553	107.637	152.002	158.293	48.7232	90.6349	35.6801
EVM0011449	0.656773	turquoise	PREDICTED: protein ABHD17B [Nelumbo nucifera]		38.0534	34.2346	37.732	34.8172	41.655	33.5166	31.9444	32.6085	24.4708	28.9675	22.4954
Liquidambar_formosana_newGene_6392	0.749977	turquoise	#N/A		2.79153	5.05301	5.01748	4.86263	2.48918	3.64492	3.38306	3.48221	0.966958	1.85804	1.4891
EVM0000803	0.7677	turquoise	PREDICTED: uncharacterized protein LOC100255308 [Vitis vinifera]		10.5718	14.0933	8.98986	10.8232	7.80598	12.1717	7.53467	7.34102	2.90931	3.87692	4.5664
EVM0000807	0.882809	turquoise	G-type lectin S-receptor-like serine/threonine-protein kinase At2g19130 [Carica papaya]		12.5749	16.9376	13.0291	14.3433	18.4393	14.7999	18.7755	17.4617	5.15046	5.46694	3.02007
Liquidambar_formosana_newGene_5600	0.632367	turquoise	hypothetical protein VITISV_044373 [Vitis vinifera]		0.222065	2.43542	3.21965	2.15317	2.55975	1.29286	0.949166	2.12077	0.0179777	0.025419	0.0523053
EVM0003653	0.820683	turquoise	PREDICTED: SWI/SNF complex subunit SWI3D [Juglans regia]		18.294	16.8059	19.9147	19.1531	17.4745	16.6202	13.8263	12.8922	7.20088	8.80356	9.90598
EVM0000371	0.706971	turquoise	PREDICTED: uncharacterized protein At2g29880-like [Elaeis guineensis]		2.02994	1.67625	3.08775	2.24568	2.19683	2.25529	1.79954	1.5147	0.476569	0.925468	0.794095
EVM0009517	0.724729	turquoise	PREDICTED: multiple organellar RNA editing factor 8, chloroplastic/mitochondrial-like [Nelumbo nucifera]		14.5851	14.0464	11.1284	6.81306	10.0308	16.4448	15.6847	12.719	2.07791	4.95168	4.47668
EVM0003777	0.489719	turquoise	PREDICTED: stress-associated endoplasmic reticulum protein 2 isoform X1 [Vitis vinifera]		50.3559	58.1757	44.0955	34.8484	52.6999	36.3971	57.2445	72.8886	18.4687	55.383	34.0769
Liquidambar_formosana_newGene_1606	0.83403	turquoise	#N/A		9.72302	9.73426	5.22219	7.849	6.93734	12.0423	10.4528	8.62787	1.0647	3.33077	3.48981
EVM0007061	0.831629	turquoise	unnamed protein product, partial [Vitis vinifera]		61.3524	100.066	79.799	82.791	76.7436	84.182	78.5408	91.7201	37.1723	65.1508	58.76
EVM0002424	0.763161	turquoise	hypothetical protein POPTR_0013s03020g [Populus trichocarpa]		13.7558	13.8162	12.8535	14.6127	12.4801	12.1988	10.9912	9.75288	5.42545	6.89404	6.72609
EVM0027068	0.644634	turquoise	PREDICTED: protein BASIC PENTACYSTEINE7 [Theobroma cacao]		18.2107	28.6441	8.28894	31.4262	14.8546	18.0333	27.3585	28.063	2.92476	3.81504	11.6891
EVM0006334	0.576668	turquoise	GABA transporter 1 [Herrania umbratica]		17.9322	42.1413	40.18	41.5568	57.5571	49.8226	28.7402	22.8878	35.0775	3.87005	1.7915
EVM0006336	0.896624	turquoise	uncharacterized protein LOC18046470 [Citrus clementina]		36.2727	31.8673	34.5745	30.6248	31.6439	33.2891	30.0899	35.3445	16.2371	18.4242	18.2832
Liquidambar_formosana_newGene_101	0.739437	turquoise	probable serine/threonine-protein kinase PBL11 isoform X2 [Jatropha curcas]		0.450321	0.722837	0.439367	0.846126	0.414797	0.606936	0.600159	0.941955	0.138152	0.244292	0.272932
Liquidambar_formosana_newGene_13233	0.700532	turquoise	LOW QUALITY PROTEIN: cucumisin-like [Carica papaya]		6.66419	6.55207	5.65627	8.05895	4.425	5.43752	9.19848	11.5611	3.40425	2.52894	5.03818
EVM0026002	0.754318	turquoise	PREDICTED: transcription termination factor MTERF4, chloroplastic [Nelumbo nucifera]		1.66461	2.14435	1.11984	1.64031	2.14311	2.52648	2.7109	2.54438	0.450869	0.938738	0.907865
EVM0017259	0.744382	turquoise	PREDICTED: RNA polymerase I-specific transcription initiation factor rrn3 [Vitis vinifera]		67.0887	68.5463	56.8276	62.9307	80.9763	94.0394	89.9148	88.274	42.7646	57.0445	48.4123
EVM0007885	0.773433	turquoise	PREDICTED: uncharacterized protein LOC105954836 [Erythranthe guttata]		0.886704	4.67898	5.00758	7.25765	5.69365	4.66702	3.89259	4.80335	0	0.467882	0.404128
EVM0007886	0.874895	turquoise	PREDICTED: uncharacterized protein LOC100264768 isoform X2 [Vitis vinifera]		28.3348	26.1982	35.2202	27.4337	28.3593	28.6002	22.5187	20.6782	7.90287	12.2249	10.8053
EVM0010152	0.640787	turquoise	PREDICTED: ribosomal L1 domain-containing protein 1-like [Pyrus x bretschneideri]		10.9686	9.62856	9.63917	5.6664	7.75875	11.0143	9.36397	6.65971	2.3765	4.96177	3.4217
EVM0011280	0.793962	turquoise	PREDICTED: protein NETWORKED 3C-like isoform X2 [Juglans regia]		22.0065	52.999	23.2102	36.4532	42.9695	29.487	35.627	36.4537	2.36895	5.4378	6.16284
EVM0017879	0.552368	turquoise	serine/threonine-protein kinase rio1-like [Manihot esculenta]		19.8183	20.888	22.86	17.8989	21.0989	28.1174	20.7847	16.6194	9.01647	19.3108	13.3691
EVM0017878	0.62868	turquoise	PREDICTED: PRKR-interacting protein 1 [Vitis vinifera]		3.0037	3.96702	4.05633	3.28604	2.00802	2.74308	1.78786	2.89807	1.01791	0.848122	1.28398
EVM0029371	0.758259	turquoise	Rrp15p domain-containing protein [Cephalotus follicularis]		2.86376	4.37752	4.55831	2.63941	3.67673	3.5127	4.20079	4.45279	1.2908	1.53859	2.80515
EVM0017874	0.874243	turquoise	PREDICTED: uncharacterized protein LOC100254195 isoform X2 [Vitis vinifera]		10.8296	13.5968	10.0274	15.8394	12.1512	11.8423	13.363	14.0616	5.47032	6.60113	9.01657
EVM0017876	0.782069	turquoise	PREDICTED: transmembrane protein 120 homolog isoform X1 [Vitis vinifera]		47.9135	46.5164	46.5115	45.6353	57.9246	61.0611	56.2687	58.8588	26.3103	41.7752	37.1153
EVM0001034	0.69508	turquoise	PREDICTED: DNA ligase 1 isoform X1 [Vitis vinifera]		125.964	113.445	76.3684	107.407	127.952	145.013	157.184	139.755	83.0522	69.0839	87.0336
EVM0024574	0.907724	turquoise	PREDICTED: DExH-box ATP-dependent RNA helicase DExH10 isoform X1 [Vitis vinifera]		20.6962	25.0914	20.7102	19.3824	21.2927	24.8574	19.3239	18.8713	10.8641	12.4828	13.8459
EVM0005904	0.830932	turquoise	PREDICTED: uncharacterized protein LOC100255662 isoform X3 [Vitis vinifera]		18.4108	20.7698	21.9307	21.2906	25.8838	24.0049	24.3276	23.2459	12.1177	12.9158	13.0127
EVM0003434	0.67924	turquoise	PREDICTED: zinc finger protein ZPR1 [Vitis vinifera]		3.68095	12.629	17.7301	12.803	16.2715	13.7993	18.5546	15.2221	3.38058	4.12789	5.17142
EVM0028094	0.714271	turquoise	LOW QUALITY PROTEIN: syntaxin-112 [Citrus clementina]		10.1145	33.1627	30.1521	23.4704	19.9178	25.4578	14.143	20.835	4.97732	5.74581	5.07533
EVM0022939	0.725374	turquoise	PREDICTED: trihelix transcription factor ASIL1 [Vitis vinifera]		16.0783	11.7998	14.2236	16.195	14.3511	12.6523	21.296	30.94	5.56238	7.67569	10.927
Liquidambar_formosana_newGene_14490	0.661398	turquoise	#N/A		0.171242	0.691422	1.70581	0.789267	0.85862	0.737829	0.909453	0.874792	0.011645	0.0333757	0.192092
EVM0016393	0.960269	turquoise	PREDICTED: splicing factor U2af large subunit B [Vitis vinifera]		14.2842	19.7537	17.2476	17.9544	19.1038	21.7989	17.1717	16.0468	8.7077	8.75479	9.88987
EVM0016397	0.736896	turquoise	PREDICTED: uncharacterized protein LOC100251139 isoform X1 [Vitis vinifera]		3.75922	7.86937	3.29445	5.82687	5.78253	5.04119	8.56926	5.85396	1.82309	2.26026	3.99117
EVM0013342	0.771612	turquoise	PREDICTED: proline-, glutamic acid- and leucine-rich protein 1 [Vitis vinifera]		3.1541	3.28024	3.2315	2.52384	4.73511	6.55048	3.49197	3.11254	1.03537	1.42802	1.40245
EVM0013341	0.728255	turquoise	PREDICTED: uncharacterized protein LOC105124874 isoform X2 [Populus euphratica]		2.6264	4.09156	5.18243	4.14085	2.75328	4.06283	2.11789	2.3584	0.367132	1.20316	1.01361
EVM0004266	0.819698	turquoise	Protein kinase domain [Macleaya cordata]		96.7265	116.492	81.8466	132.159	139.325	104.426	94.9546	113.919	39.0183	52.2162	37.6583
Liquidambar_formosana_newGene_6020	0.77165	turquoise	hypothetical protein VITISV_042518 [Vitis vinifera]		1.39802	4.1146	5.07413	3.39002	3.84618	3.32633	3.92872	4.43294	0.8461	1.37402	1.49866
EVM0023817	0.832648	turquoise	probable protein arginine N-methyltransferase 6 isoform X1 [Morus notabilis]		16.4966	19.473	13.7198	12.7636	17.3649	20.2108	15.7779	14.4222	8.65293	10.566	10.4869
EVM0023813	0.694121	turquoise	PREDICTED: uncharacterized protein LOC100249372 [Vitis vinifera]		10.0331	12.6569	7.62406	17.1698	6.85031	9.23497	11.0822	11.0306	2.58426	5.73603	6.19792
EVM0025305	0.821713	turquoise	PREDICTED: 26S protease regulatory subunit 8 homolog A [Vitis vinifera]		129.675	127.203	82.7199	123.807	121.184	140.574	144.777	136.269	64.2745	85.517	71.1011
EVM0025302	0.916524	turquoise	PREDICTED: pentatricopeptide repeat-containing protein At5g62370 [Vitis vinifera]		3.42484	5.44411	3.6128	4.28518	3.15539	5.60126	3.8364	3.74413	1.46517	1.62159	1.78941
EVM0008952	0.772993	turquoise	PREDICTED: pantothenate kinase 1 [Vitis vinifera]		29.298	47.2249	40.1165	51.7277	48.1066	46.0038	35.0017	25.1866	17.3093	23.5687	14.981
Liquidambar_formosana_newGene_2827	0.602627	turquoise	protein FAR1-RELATED SEQUENCE 5-like [Prunus avium]		1.8423	2.02467	0.910287	0.770038	0.790725	2.76679	0.702944	0.709777	0.0655543	0.195872	0.467972
Liquidambar_formosana_newGene_6564	0.386659	turquoise	#N/A		6.43337	22.1589	32.7693	20.1743	36.4554	41.5003	67.3861	55.2815	28.9887	14.9133	11.6088
EVM0019268	0.519713	turquoise	PREDICTED: uncharacterized protein LOC105133379 isoform X5 [Populus euphratica]		4.58439	4.73372	6.12166	5.25114	5.7423	5.96364	5.90046	6.29749	4.84072	2.99421	4.02316
Liquidambar_formosana_newGene_1022	0.861368	turquoise	hypothetical protein VITISV_039779 [Vitis vinifera]		1.96415	4.43093	2.46639	5.29376	3.48072	2.08648	3.0576	4.03938	0.381909	0.299359	0.979578
Liquidambar_formosana_newGene_1020	0.658039	turquoise	#N/A		1.53525	11.056	1.15315	9.03885	2.73907	5.34079	4.58203	3.26343	0	0.030601	0.978171
Liquidambar_formosana_newGene_4059	0.736008	turquoise	#N/A		0.443264	0.460675	0.427693	0.531125	0.524494	0.99354	0.639524	0.781984	0.0266527	0.0957313	0.223797
EVM0009234	0.771131	turquoise	PREDICTED: mediator of RNA polymerase II transcription subunit 16 isoform X1 [Ricinus communis]		33.2692	31.3751	25.4455	30.0293	32.5323	43.5326	34.3938	37.0015	15.4193	24.4803	25.0123
EVM0001746	0.741916	turquoise	PREDICTED: uncharacterized protein LOC104881376 [Vitis vinifera]		20.7719	34.3885	43.8542	28.8299	31.1191	35.0521	17.2664	12.2701	2.64989	9.96325	5.8542
EVM0001742	0.662293	turquoise	PREDICTED: ubiquitin carboxyl-terminal hydrolase 16 [Vitis vinifera]		37.0746	41.0598	66.0718	39.0686	70.1027	81.545	64.7602	67.6161	28.0153	32.075	29.6079
EVM0001743	0.800162	turquoise	PREDICTED: RNA-binding protein 39 isoform X2 [Vitis vinifera]		108.327	143.396	82.5899	116.214	99.9652	121.992	119.762	121.548	57.7791	59.2447	79.803
Liquidambar_formosana_newGene_2593	0.817037	turquoise	hypothetical protein VITISV_008538 [Vitis vinifera]		0.896328	1.62058	1.72661	1.87046	1.74177	1.95005	1.64281	1.95968	0.772061	0.82524	1.03635
EVM0004217	0.713265	turquoise	PREDICTED: agamous-like MADS-box protein AGL19 [Populus euphratica]		1.70364	2.32671	2.99159	2.50857	3.05595	1.54614	2.18892	2.80855	0.464048	1.28188	1.14171
EVM0004211	0.681587	turquoise	PREDICTED: regulatory protein NPR3-like isoform X2 [Populus euphratica]		54.2604	66.9276	92.0628	81.0812	90.4581	106.47	122.197	100.606	30.2762	80.5438	44.8343
EVM0015727	0.802475	turquoise	Sec14p-like phosphatidylinositol transfer family protein isoform 1 [Theobroma cacao]		73.2423	100.804	66.668	110.896	80.9847	75.3151	55.2536	45.1883	12.089	36.4835	16.0812
EVM0015726	0.706063	turquoise	PREDICTED: ribose-phosphate pyrophosphokinase 4 [Vitis vinifera]		32.343	32.3586	23.9127	28.5126	34.013	33.3949	33.0694	36.1896	14.0547	29.1983	24.6249
EVM0003639	0.734472	turquoise	PREDICTED: hydroxyacylglutathione hydrolase cytoplasmic [Pyrus x bretschneideri]		57.6811	100.941	63.2024	76.7883	97.2946	105.457	107.149	100.688	38.7901	71.1381	52.7446
EVM0002327	0.793332	turquoise	PREDICTED: F-box protein At5g51380-like [Juglans regia]		11.8724	4.9502	8.90516	12.2459	5.77829	7.14386	8.39763	10.2387	2.11918	5.35709	5.31297
EVM0002324	0.529536	turquoise	hypothetical protein CCACVL1_28976 [Corchorus capsularis]		1.19168	0.636189	1.29227	1.30948	1.91133	1.20063	2.05546	2.25542	0.58222	0.762851	0.928489
EVM0002328	0.804558	turquoise	PREDICTED: uncharacterized protein LOC100256489 [Vitis vinifera]		8.10592	11.4992	11.0409	14.5306	8.54804	8.64206	8.65318	9.39126	1.01016	3.16699	3.74308
EVM0005678	0.907627	turquoise	PREDICTED: probable protein S-acyltransferase 15 [Vitis vinifera]		15.2085	14.5764	15.4537	16.2131	11.7303	14.1752	13.2679	14.1383	4.69165	9.15785	7.30196
EVM0003984	0.845174	turquoise	PREDICTED: growth-regulating factor 1 [Vitis vinifera]		6.7398	24.7919	23.8244	27.2915	29.6545	34.9122	34.3611	40.1244	0.669319	2.80081	14.7424
EVM0003985	0.768053	turquoise	hypothetical protein CFOL_v3_08194 [Cephalotus follicularis]		15.9592	16.8902	7.1212	11.1335	10.5716	16.9484	15.4937	15.9807	5.29249	6.20338	7.12251
EVM0003982	0.611903	turquoise	ferritin-3, chloroplastic-like [Durio zibethinus]		13.4206	12.0121	8.18007	8.60209	13.4346	19.9619	13.0721	9.57599	2.69683	2.24835	4.52007
EVM0007298	0.790883	turquoise	PREDICTED: phosphoserine aminotransferase 2, chloroplastic [Vitis vinifera]		63.2136	53.2137	77.5234	49.7587	57.2784	66.7429	64.0155	67.6254	9.61922	39.0234	24.2801
EVM0002585	0.6422	turquoise	PREDICTED: sterol 3-beta-glucosyltransferase UGT80A2-like [Nicotiana tomentosiformis]		0.557294	1.51607	4.58071	2.42358	4.13762	2.33607	2.49444	4.29163	0.0272613	0.409996	0.873782
EVM0004981	0.706419	turquoise	PREDICTED: uncharacterized protein LOC18604918 [Theobroma cacao]		24.4751	57.7846	25.1067	35.9337	18.9713	33.817	18.3365	6.14543	0	0.345922	0.188274
Liquidambar_formosana_newGene_319	0.781242	turquoise	#N/A		1.5719	2.47503	1.90593	2.55054	1.65746	1.80614	1.81764	2.41332	0.334455	0.317482	0.829329
EVM0016401	0.496409	turquoise	cytochrome c oxidase assembly protein COX19-like [Manihot esculenta]		16.2851	22.3023	21.3502	14.6461	20.6912	26.3174	18.9111	19.2868	9.48584	14.7404	17.1769
EVM0016407	0.864015	turquoise	uncharacterized protein LOC110411594 [Herrania umbratica]		41.0855	46.3637	44.2272	46.6432	36.6202	38.0737	35.6017	29.89	15.6579	24.3363	19.3754
EVM0016405	0.875017	turquoise	PREDICTED: DEAD-box ATP-dependent RNA helicase 35 [Vitis vinifera]		33.7981	34.9616	34.0119	37.6778	30.0247	31.1352	33.5553	28.7803	8.06794	23.0495	12.5986
EVM0006165	0.744295	turquoise	PREDICTED: uncharacterized protein LOC18607691 [Theobroma cacao]		8.01933	9.65666	7.85029	8.06162	10.1263	11.8322	12.9091	13.5118	4.25571	7.00975	5.79889
EVM0005582	0.77418	turquoise	PREDICTED: uncharacterized protein LOC100263258 [Vitis vinifera]		3.63589	5.48644	4.20108	3.9861	4.13596	6.80562	5.63565	5.44172	1.61199	1.71332	0.946141
EVM0027562	0.726243	turquoise	PREDICTED: pentatricopeptide repeat-containing protein At2g15690 [Vitis vinifera]		24.8597	26.4601	27.3585	25.0751	22.7527	25.8723	24.9278	22.2404	13.1332	17.131	13.5315
EVM0014802	0.794172	turquoise	PREDICTED: uncharacterized protein LOC100257505 [Vitis vinifera]		43.9545	46.6453	54.7026	51.3897	38.9306	29.4846	26.7346	23.161	5.92086	17.3785	6.66392
EVM0026211	0.934267	turquoise	KH domain-containing protein HEN4-like [Quercus suber]		78.4733	87.8665	82.2525	94.0888	78.5059	90.3788	74.5637	76.6038	31.7716	53.2805	48.0761
EVM0021653	0.704559	turquoise	PREDICTED: uncharacterized protein At1g26090, chloroplastic isoform X1 [Prunus mume]		6.23405	8.92891	11.5745	9.37951	8.27174	7.79594	5.8546	6.9723	2.19584	3.70545	5.73603
EVM0025892	0.700619	turquoise	PREDICTED: pentatricopeptide repeat-containing protein At1g02060, chloroplastic [Vitis vinifera]		4.23732	4.87561	3.56805	5.22015	2.809	3.78236	3.2306	3.88467	1.22961	1.52893	2.61883
EVM0011097	0.760886	turquoise	uncharacterized protein LOC112005140 [Quercus suber]		7.49836	7.12791	5.63656	10.2765	5.90328	6.18475	5.57784	5.73646	1.66608	2.60041	4.16101
Liquidambar_formosana_newGene_11237	0.743969	turquoise	hypothetical protein GOBAR_DD30819 [Gossypium barbadense]		1.65581	1.74862	0.945112	2.99597	1.03802	1.91019	1.02662	1.13224	0	0.172138	0.822646
EVM0028125	0.790881	turquoise	PREDICTED: aluminum-activated malate transporter 9 [Vitis vinifera]		2.27935	3.87099	4.65866	4.42841	4.33982	4.43282	4.13133	5.3783	1.29315	1.57302	2.73745
EVM0028124	0.878759	turquoise	hypothetical protein CDL15_Pgr010392 [Punica granatum]		48.0337	53.8539	38.4728	42.6894	45.097	54.9403	53.9866	52.3183	21.1254	29.521	29.8559
EVM0020219	0.835761	turquoise	DDT domain-containing protein DDR4-like isoform X3 [Hevea brasiliensis]		8.38916	9.76619	6.00838	7.43429	9.98734	10.7117	8.7719	6.81991	4.06303	3.24609	4.47016
EVM0023310	0.715453	turquoise	PREDICTED: exportin-2 [Vitis vinifera]		7.35574	8.314	5.61604	6.48512	5.43355	8.53562	5.37169	5.17494	2.44734	3.96382	3.54704
EVM0020210	0.888824	turquoise	PREDICTED: vacuolar protein sorting-associated protein 35B [Vitis vinifera]		63.1083	78.3696	74.141	81.6004	74.6678	69.1129	61.5725	60.4584	22.1611	46.9874	37.9906
EVM0023496	0.375468	turquoise	E3 ubiquitin-protein ligase RNF4 [Hevea brasiliensis]		56.0675	62.6522	77.3302	52.1243	89.5639	89.1612	110.059	85.6717	60.9771	74.558	58.0855
EVM0027976	0.437558	turquoise	dnaJ subfamily C member 28-like protein [Corchorus capsularis]		17.5548	20.9136	17.5397	15.935	31.3819	31.6432	37.5597	45.7893	23.8617	11.853	12.3052
Liquidambar_formosana_newGene_11491	0.703918	turquoise	SKP1-like protein 1B isoform X4 [Aegilops tauschii subsp. tauschii]		2.838	3.10683	5.09141	3.9265	3.45246	3.51371	3.37827	3.20749	0.955242	2.58697	1.34449
Liquidambar_formosana_newGene_13892	0.681439	turquoise	#N/A		13.104	13.5492	14.4383	43.9289	31.2904	41.1073	38.7776	29.1217	0.0764967	1.22939	0.0378807
Liquidambar_formosana_newGene_4525	0.639571	turquoise	#N/A		6.84725	5.14887	3.87712	4.13865	5.10618	3.79126	4.25479	4.70702	2.39774	2.59869	2.81601
Liquidambar_formosana_newGene_12712	0.662364	turquoise	hypothetical protein POPTR_0176s00230g [Populus trichocarpa]		1.1498	1.58942	0.833647	3.2103	1.25802	1.10045	2.31831	2.535	0.382899	0.704706	0.915108
Liquidambar_formosana_newGene_12711	0.571931	turquoise	#N/A		1.48857	3.67351	0.577788	2.5455	3.02965	1.68737	1.89467	2.45609	0.364464	0.459677	0.604656
EVM0009966	0.650045	turquoise	WD40 protein [Paeonia suffruticosa]		100.899	93.4846	63.638	81.6972	73.6983	78.0019	101.777	109.934	49.8115	61.741	62.8957
Liquidambar_formosana_newGene_12853	0.621905	turquoise	BTB/POZ and MATH domain-containing protein 3-like [Trifolium pratense]		2.08763	2.50088	1.66612	3.09049	1.64184	2.1708	1.96334	2.71425	1.19143	1.36234	2.09227
EVM0011871	0.776589	turquoise	PREDICTED: pentatricopeptide repeat-containing protein At5g01110 [Vitis vinifera]		2.25609	2.78856	4.66459	2.99703	2.36471	1.94664	2.37371	3.13058	0.281807	1.11245	0.843653
EVM0010555	0.629066	turquoise	uncharacterized protein LOC110415840 [Herrania umbratica]		0.478242	32.882	7.68357	32.1981	11.9672	12.4263	18.8681	15.5279	0.0399173	0	3.66777
EVM0007968	0.403248	turquoise	uncharacterized protein LOC111297274 isoform X1 [Durio zibethinus]		8.42623	14.5919	12.8069	6.52381	9.68546	14.0061	10.6385	7.12213	6.34956	7.2708	6.15024
EVM0027534	0.838882	turquoise	PREDICTED: AT-rich interactive domain-containing protein 6 isoform X1 [Juglans regia]		47.8581	53.5978	47.6296	55.5898	59.6407	57.0347	54.1271	49.8101	25.3819	34.7738	36.8258
EVM0000466	0.797085	turquoise	PREDICTED: zinc finger protein 511 [Vitis vinifera]		33.0137	29.4781	21.4644	15.4153	22.8434	24.8444	30.9921	28.8124	5.64928	7.29913	10.7567
EVM0000467	0.63469	turquoise	uncharacterized protein LOC110765384 [Prunus avium]		2.38458	4.46397	6.59212	1.67087	6.51199	6.73424	15.3794	4.97094	0	0.508142	2.27626
EVM0004395	0.855144	turquoise	PREDICTED: pentatricopeptide repeat-containing protein At2g01740-like [Prunus mume]		5.39665	5.5327	6.66621	6.18829	4.30083	6.60809	4.90604	4.84419	0.850722	1.30389	1.67324
EVM0014684	0.727125	turquoise	hypothetical protein VITISV_016382 [Vitis vinifera]		35.1123	31.5173	24.5532	42.0021	27.532	27.3081	30.3978	28.2105	12.8314	16.157	19.9639
EVM0015553	0.855728	turquoise	hypothetical protein CISIN_1g039105mg [Citrus sinensis]		9.21836	17.9772	18.2618	13.968	18.0574	18.0737	12.6444	13.606	4.30604	6.56655	7.62137
EVM0012684	0.724548	turquoise	protein WHAT&apos;S THIS FACTOR 1 homolog [Quercus suber]		4.71339	4.33764	2.91374	6.25259	2.59988	3.87647	4.04812	4.53634	1.29181	2.02319	2.34078
EVM0012681	0.436937	turquoise	LEC14B homolog [Jatropha curcas]		26.1436	21.356	15.5142	30.9977	45.13	50.8809	55.7269	55.8193	25.8218	30.2274	15.0265
EVM0022192	0.739936	turquoise	protein ROS1-like isoform X1 [Quercus suber]		12.5195	15.4845	19.9775	21.5877	19.1155	18.7638	25.986	28.2464	10.3392	10.6487	14.9289
EVM0027346	0.475871	turquoise	PREDICTED: putative clathrin assembly protein At2g01600 isoform X1 [Vitis vinifera]		30.6245	23.1464	35.4512	34.4417	31.9266	30.8994	23.0977	24.5567	18.7813	24.639	25.3368
EVM0012024	0.793424	turquoise	PREDICTED: uncharacterized protein LOC100259962 [Vitis vinifera]		20.6973	22.3341	20.1457	20.6717	26.6522	26.55	20.2031	16.6533	8.34844	16.2624	12.3268
EVM0003864	0.796925	turquoise	uncharacterized protein LOC100260066 [Vitis vinifera]		1.72649	1.95873	1.26182	0.900986	2.12198	1.73237	1.89949	2.21196	0.385941	0.416202	0.543409
EVM0007154	0.702842	turquoise	PREDICTED: snRNA-activating protein complex subunit [Nelumbo nucifera]		9.6563	15.4581	18.1029	18.1585	11.6162	13.1093	12.3409	11.9846	6.21522	8.39731	10.107
EVM0024924	0.414467	turquoise	PREDICTED: probable UDP-N-acetylglucosamine--peptide N-acetylglucosaminyltransferase SEC [Prunus mume]		46.6305	52.8824	101.655	77.9003	115.923	76.5965	95.3156	96.248	58.0797	68.5254	68.5008
Liquidambar_formosana_newGene_537	0.771902	turquoise	#N/A		13.6326	11.8687	17.849	16.5192	15.3222	12.5592	15.3781	16.0049	3.41272	7.68445	10.9665
EVM0026532	0.783064	turquoise	unnamed protein product, partial [Vitis vinifera]		51.8265	79.8857	26.0411	50.0223	61.2982	59.2119	73.403	71.9425	8.72098	33.1902	24.3301
EVM0010463	0.780534	turquoise	PREDICTED: UTP:RNA uridylyltransferase 1-like [Juglans regia]		83.3461	62.824	43.9315	70.1876	62.1918	57.1399	75.0144	85.6963	22.3444	25.4008	37.4847
EVM0022532	0.417769	turquoise	salutaridine reductase-like [Quercus suber]		0.044362	1.28233	0.494009	0	10.1676	18.1784	9.05546	0.916547	0.407621	1.09294	0.232111
Liquidambar_formosana_newGene_13610	0.754684	turquoise	#N/A		0.341829	1.02102	0.490172	0.648946	0.762029	0.8499	0.972494	1.72484	0.223633	0.0649333	0.076084
Liquidambar_formosana_newGene_13618	0.656363	turquoise	uncharacterized protein LOC112000496 [Quercus suber]		0.501247	0.897344	0.985672	1.54178	0.885746	0.677289	1.06004	0.996265	0.362235	0.361498	0.390317
EVM0019215	0.909919	turquoise	PREDICTED: asparagine synthetase domain-containing protein 1 [Vitis vinifera]		10.804	10.9688	11.5323	10.4871	10.4307	11.1142	10.1345	10.4981	4.42035	4.62081	6.63258
EVM0011606	0.707859	turquoise	ubiquitin conjugating enzyme S [Camellia oleifera]		38.6202	39.955	40.2955	37.7884	55.6332	50.7865	57.3403	52.3175	17.9555	40.5936	27.241
EVM0024269	0.685568	turquoise	transcription termination factor MTERF15, mitochondrial [Quercus suber]		3.85876	8.22311	5.88669	8.07334	3.63215	4.45475	4.46326	5.02456	0.806594	2.48118	2.81122
EVM0024261	0.906705	turquoise	PREDICTED: pentatricopeptide repeat-containing protein At2g15980 [Vitis vinifera]		10.9104	10.0419	10.3217	14.4227	9.18695	9.2787	10.8031	11.7054	1.75844	2.99909	4.1881
EVM0028568	0.79218	turquoise	PREDICTED: stress response protein nst1 [Vitis vinifera]		33.3773	33.7229	42.8893	45.7895	40.9822	36.5157	31.1475	31.6181	16.7497	24.9263	17.8812
EVM0028560	0.808998	turquoise	PREDICTED: UDP-glycosyltransferase TURAN-like isoform X2 [Malus domestica]		21.9282	25.7921	31.4271	26.5825	28.5494	30.2983	29.9689	33.3262	16.8426	20.1473	21.9075
Liquidambar_formosana_newGene_6318	0.81045	turquoise	PREDICTED: uncharacterized protein LOC109020151 isoform X1 [Juglans regia]		3.27703	4.97384	2.2498	2.89754	2.81199	4.33133	3.21741	2.48013	0.840065	1.03042	0.85072
EVM0023285	0.710376	turquoise	PREDICTED: ribonucleases P/MRP protein subunit POP1 isoform X1 [Vitis vinifera]		5.83994	10.0732	7.57624	6.32084	9.35904	11.2664	8.964	8.21747	6.34229	4.15621	5.11823
EVM0024486	0.575133	turquoise	chalcone isomerase [Camellia fraterna]		25.1901	134.641	57.2667	77.4426	102.484	132.163	40.3669	31.8208	8.59919	45.6005	11.9024
EVM0022886	0.700003	turquoise	PREDICTED: uncharacterized protein LOC104607156 [Nelumbo nucifera]		26.9928	24.0424	22.9877	27.5381	18.506	19.3282	18.1116	18.9887	5.66023	12.42	11.7474
Liquidambar_formosana_newGene_10735	0.637341	turquoise	#N/A		28.973	32.5691	24.4909	28.1387	33.1365	46.334	27.5189	24.4127	15.0514	23.5486	18.6255
Liquidambar_formosana_newGene_5572	0.784972	turquoise	hypothetical protein BVC80_7939g8 [Macleaya cordata]		9.22256	8.6753	8.72914	8.01515	8.10613	9.62203	9.87985	8.86827	3.17036	6.65944	6.38757
EVM0021687	0.757911	turquoise	PREDICTED: uncharacterized protein LOC109014559 [Juglans regia]		29.0669	31.8824	27.9421	25.9181	22.4992	28.3624	20.0435	19.5452	12.387	13.6974	11.8243
EVM0021424	0.806382	turquoise	PREDICTED: ER lumen protein-retaining receptor A [Theobroma cacao]		13.0265	18.9573	14.706	17.7264	11.5723	16.0131	13.6372	11.7606	6.46473	7.67216	8.98798
Liquidambar_formosana_newGene_6884	0.830757	turquoise	#N/A		14.3411	19.9595	9.3623	25.5347	14.3956	15.1541	17.8285	16.8456	2.62618	2.7241	5.78384
EVM0008860	0.702088	turquoise	PREDICTED: beta-1,3-galactosyltransferase 7 [Nelumbo nucifera]		19.5151	11.3142	13.8856	14.52	14.3398	21.4211	12.1958	16.1076	5.18103	13.2102	6.44238
EVM0008864	0.813757	turquoise	protein BASIC PENTACYSTEINE1-like [Vitis vinifera]		52.8105	63.7516	53.1952	48.1959	46.8318	52.9621	40.5813	38.4346	16.5554	32.1791	30.6454
EVM0026731	0.750401	turquoise	PREDICTED: F-box/kelch-repeat protein At3g06240-like isoform X2 [Gossypium arboreum]		6.13264	7.68833	10.1177	8.91252	6.1099	7.16684	8.55754	8.66227	1.61165	5.37612	2.60481
EVM0001890	0.873486	turquoise	PREDICTED: uncharacterized protein LOC104881089 isoform X1 [Vitis vinifera]		15.411	26.526	23.981	23.1046	25.6216	28.1589	27.5656	24.9505	8.6379	11.1535	11.8183
EVM0026084	0.72058	turquoise	PREDICTED: protein STRICTOSIDINE SYNTHASE-LIKE 5-like [Fragaria vesca subsp. vesca]		73.4798	115.96	61.6762	90.3362	58.4803	63.8694	59.14	62.6475	2.66382	44.9541	33.8828
EVM0016834	0.824698	turquoise	peroxisomal (S)-2-hydroxy-acid oxidase isoform X2 [Herrania umbratica]		5.92583	4.88572	3.43542	5.4399	4.91719	3.75969	4.8972	6.27105	0.550205	1.6318	2.0391
EVM0001278	0.829822	turquoise	PREDICTED: serine/arginine-rich splicing factor RS2Z32-like isoform X1 [Juglans regia]		215.843	223.468	189.201	123.414	243.135	302.679	251.014	245.639	50.8242	70.8133	73.8292
EVM0001274	0.841445	turquoise	PREDICTED: serine/threonine-protein kinase D6PKL1 [Vitis vinifera]		10.2619	11.5743	17.2748	14.6306	18.2825	16.6433	18.7135	17.4547	4.01054	8.48566	7.15161
EVM0014525	0.647893	turquoise	PREDICTED: DNA-directed RNA polymerase II subunit 1 [Vitis vinifera]		0.532506	3.39357	6.23369	2.06163	4.96541	3.77992	4.40956	2.94142	0.782603	0.436732	0.846963
EVM0009387	0.965307	turquoise	PREDICTED: E4 SUMO-protein ligase PIAL1 isoform X1 [Vitis vinifera]		15.0004	21.2982	18.125	18.206	23.8364	22.9717	21.8524	17.6561	4.82665	9.3246	8.38843
EVM0005983	0.86064	turquoise	ubiquitin domain-containing protein DSK2b isoform X1 [Morus notabilis]		87.8086	73.2785	59.5481	70.9084	64.6481	73.1374	79.7177	78.191	34.9187	53.462	44.0229
EVM0029369	0.750824	turquoise	uncharacterized protein LOC111277623 [Durio zibethinus]		3.41095	10.9683	4.65142	7.6597	8.71358	6.81415	9.86089	4.38243	0.815434	2.05999	3.48953
EVM0018242	0.881224	turquoise	uncharacterized protein LOC112017881 [Quercus suber]		29.9017	45.2511	24.7706	31.311	28.7974	34.1751	35.3858	32.1829	11.4786	19.9784	17.5177
EVM0018240	0.55207	turquoise	cytosolic ascorbate peroxidase [Vitis vinifera]		53.5298	70.0121	56.5468	49.1747	66.6477	49.6151	94.663	139.32	30.7105	20.2377	48.8103
EVM0004638	0.676839	turquoise	F-box/kelch-repeat protein At1g57790-like [Quercus suber]		2.84668	4.21801	3.64827	2.7621	4.438	5.26075	6.4738	4.34233	2.07819	2.06851	1.75049
EVM0024814	0.661344	turquoise	PREDICTED: F-box protein At5g06550 [Malus domestica]		4.70901	5.08343	5.8072	3.88932	4.61965	6.27614	5.61453	5.00898	1.69348	3.6278	2.68104
EVM0017194	0.833862	turquoise	PREDICTED: uncharacterized protein LOC100256489 [Vitis vinifera]		16.3592	22.2486	21.8946	22.5909	18.7753	21.7492	20.4009	20.4331	10.2147	13.0467	12.1862
EVM0025078	0.70774	turquoise	PREDICTED: long chain base biosynthesis protein 1 [Juglans regia]		14.096	9.40998	10.6375	13.114	8.13886	7.03094	6.71429	7.36894	0.879346	1.3867	1.76561
EVM0025079	0.696802	turquoise	PREDICTED: sister chromatid cohesion protein PDS5 homolog A isoform X2 [Vitis vinifera]		16.3359	19.271	18.2409	22.1491	14.5964	13.7787	17.1268	18.7075	9.79137	10.3357	13.4343
EVM0023896	0.712377	turquoise	PREDICTED: CSC1-like protein At4g02900 [Eucalyptus grandis]		5.14899	6.41628	9.00538	6.52313	5.47434	5.00277	5.57685	7.57309	2.90845	3.44996	4.68749
EVM0023897	0.889014	turquoise	centromere/kinetochore protein zw10 homolog isoform X1 [Citrus clementina]		36.43	39.2966	38.6877	36.3123	34.3852	34.1968	32.3957	32.9867	14.1171	15.4394	17.945
EVM0020601	0.784651	turquoise	Calcium dependent protein kinase [Trema orientalis]		12.1748	23.3411	23.142	17.9227	27.0639	28.5962	18.4063	18.7654	5.76153	10.2193	11.9876
EVM0024385	0.61796	turquoise	PREDICTED: coilin isoform X3 [Vitis vinifera]		40.1108	47.2432	29.1668	32.8841	36.3551	42.2024	46.4338	41.4748	17.4232	21.3722	35.6469
EVM0024389	0.682819	turquoise	cytochrome P450 87A3-like [Prunus avium]		0.296125	10.0865	3.58364	15.5403	6.49282	8.28802	11.9961	14.165	0.0237943	0.264116	1.91525
EVM0022765	0.704464	turquoise	PREDICTED: uncharacterized protein LOC100242269 [Vitis vinifera]		19.6698	20.6771	33.4121	30.1274	20.053	19.8669	17.6045	17.7843	9.7601	16.4417	10.1441
EVM0022760	0.719821	turquoise	JHL25H03.10 [Jatropha curcas]		2.56845	4.00047	4.18503	3.53985	4.39753	4.25189	5.40671	5.22886	2.41619	1.69735	2.25137
EVM0025384	0.796512	turquoise	hypothetical protein POPTR_0009s17020g [Populus trichocarpa]		31.5887	43.8509	26.5224	31.8756	27.6115	37.2637	29.7821	31.3418	17.7658	18.8664	13.4085
EVM0029008	0.665245	turquoise	CTP synthase-like [Manihot esculenta]		47.4409	58.8108	35.4914	24.9374	106.064	107.003	92.7485	72.9674	8.94285	12.2788	9.7764
EVM0021230	0.636209	turquoise	PREDICTED: DEAD-box ATP-dependent RNA helicase 56 [Vitis vinifera]		53.4912	93.1654	51.6739	57.712	118.957	165.09	111.529	123.121	32.6886	50.8652	41.4211
EVM0023569	0.690539	turquoise	uncharacterized protein LOC18788999 [Prunus persica]		46.4582	41.5541	47.5213	35.0578	36.9848	49.1865	42.028	38.1008	15.386	28.3492	33.8966
EVM0023567	0.719623	turquoise	PREDICTED: polyadenylation and cleavage factor homolog 4 [Vitis vinifera]		19.1651	23.4818	19.0565	28.3108	28.7889	27.4639	31.6527	34.66	17.8144	14.701	16.2448
EVM0023563	0.54043	turquoise	phosphopantothenate--cysteine ligase 1-like [Manihot esculenta]		11.9725	19.6263	23.4774	13.0322	16.5488	33.1642	11.3692	6.12263	7.84348	5.96822	8.97367
EVM0001073	0.828965	turquoise	PREDICTED: putative methyltransferase NSUN6 [Vitis vinifera]		9.41618	11.6078	9.56298	8.58888	11.1042	12.5205	9.46542	9.6516	5.19509	6.72313	7.85875
Liquidambar_formosana_newGene_11656	0.545953	turquoise	#N/A		3.49932	3.0402	2.59704	3.4096	5.21773	6.47901	6.61896	4.00227	1.80499	1.4371	2.79781
EVM0000038	0.741229	turquoise	PREDICTED: deSI-like protein At4g17486 [Vitis vinifera]		60.8578	61.0663	32.8847	54.6944	48.9286	62.2093	81.8485	81.5328	12.1425	24.7158	50.7669
EVM0009415	0.704933	turquoise	PREDICTED: RNA-binding protein 24-A isoform X1 [Vitis vinifera]		17.7911	26.4593	45.925	19.721	30.2188	39.7493	47.6887	45.201	9.96201	16.9836	12.5937
EVM0009412	0.758239	turquoise	PREDICTED: histidine--tRNA ligase, cytoplasmic [Vitis vinifera]		50.2316	50.2342	30.9001	44.9187	49.0883	55.8846	50.6662	51.1139	26.5966	36.3246	29.8899
Liquidambar_formosana_newGene_1728	0.899443	turquoise	protease Do-like 8, chloroplastic isoform X3 [Herrania umbratica]		9.72162	13.1721	9.48354	13.7627	15.1802	13.8152	15.6717	20.0428	2.26498	2.52656	6.6814
EVM0006073	0.705986	turquoise	AIG1 [Macleaya cordata]		0.441971	0.471239	0.326323	0.656403	0.40312	0.494096	0.396431	0.303621	0.202688	0.183447	0.138977
EVM0012273	0.745046	turquoise	hypothetical protein TSUD_131950 [Trifolium subterraneum]		53.1169	52.5399	37.1829	69.4509	38.2122	39.0953	33.244	34.6291	11.2358	9.1914	19.9499
Liquidambar_formosana_newGene_1897	0.876451	turquoise	uncharacterized protein LOC112031656 [Quercus suber]		7.61644	14.3288	8.1297	6.13724	9.40853	13.3435	8.06917	6.24852	0.664658	3.04611	2.58591
EVM0006474	0.637785	turquoise	PREDICTED: uncharacterized protein LOC109165372 [Ipomoea nil]		7.67261	11.1872	14.6756	6.80356	18.4681	18.3456	21.9259	21.7414	5.50208	7.84484	6.55161
Liquidambar_formosana_newGene_933	0.850942	turquoise	synaptotagmin-1-like [Olea europaea var. sylvestris]		0.859286	2.7489	3.45873	2.13681	2.80906	1.87194	3.89135	2.54877	0	0.795777	0.127074
EVM0004016	0.871382	turquoise	WD40 repeat [Macleaya cordata]		9.66867	10.4635	15.1167	15.1193	9.57108	11.81	11.8167	12.6525	3.02667	7.38394	6.36271
EVM0010363	0.830676	turquoise	PREDICTED: acetolactate synthase 1, chloroplastic [Vitis vinifera]		19.2989	22.1479	35.5484	19.4452	23.7248	23.6263	20.3482	17.6079	2.69382	4.84583	4.65291
EVM0002889	0.940462	turquoise	Small GTP-binding domain containing protein [Parasponia andersonii]		20.0721	28.1812	29.5917	28.635	27.4999	31.4407	29.7096	27.6552	10.4392	15.5362	17.883
EVM0011011	0.683181	turquoise	protein ecdysoneless homolog [Quercus suber]		11.8262	14.7012	15.0642	15.6673	12.3809	14.9082	11.2892	11.6364	4.82295	8.11258	8.63069
EVM0011013	0.827438	turquoise	bHLH family protein [Populus trichocarpa]		31.7877	31.9048	22.1374	29.481	25.592	28.7349	29.6069	28.7	9.03018	20.4453	13.8511
EVM0011015	0.884684	turquoise	PREDICTED: protein CREG1 [Vitis vinifera]		17.1395	15.0463	10.898	15.5679	12.4189	12.8294	14.5008	16.6356	5.45521	7.97728	6.05308
EVM0020520	0.890127	turquoise	PREDICTED: 26S proteasome regulatory subunit 4 homolog A-like [Tarenaya hassleriana]		36.8044	44.8473	35.9547	35.9948	37.3009	42.956	35.5445	36.2933	17.1178	27.4121	20.8203
EVM0020294	0.903282	turquoise	splicing factor SF3a60 homolog [Manihot esculenta]		34.0991	42.2969	38.8556	36.8928	36.6349	47.1938	39.6317	37.8289	17.0399	24.823	22.4769
EVM0005827	0.79901	turquoise	PREDICTED: F-box/kelch-repeat protein At1g30090 isoform X4 [Vitis vinifera]		21.2744	16.5011	10.6464	22.2	13.7403	11.7807	10.9215	11.7603	4.63889	6.89248	6.7994
EVM0023360	0.711943	turquoise	PREDICTED: pentatricopeptide repeat-containing protein At3g48810 [Vitis vinifera]		5.90065	5.77785	4.91079	6.9529	4.04303	4.31184	3.82688	4.34342	1.56331	1.94155	2.43927
EVM0003375	0.698716	turquoise	PREDICTED: translocase of chloroplast 159, chloroplastic-like [Juglans regia]		1.64313	1.74812	1.29186	2.18904	1.12166	1.39431	1.19433	1.41159	0.408975	0.646039	0.524392
EVM0028192	0.927409	turquoise	PREDICTED: uncharacterized protein LOC104882625 isoform X2 [Vitis vinifera]		28.6305	38.869	38.8138	40.08	46.47	50.5652	45.6519	41.8684	7.54089	20.3504	18.5397
EVM0018558	0.884072	turquoise	PREDICTED: DNA (cytosine-5)-methyltransferase isoform X1 [Juglans regia]		9.99489	12.3528	10.9792	10.6528	9.36901	11.5487	9.43871	9.58053	4.452	6.15292	6.39854
EVM0016293	0.938643	turquoise	nitric oxide synthase-interacting protein [Herrania umbratica]		54.1387	54.5762	55.4447	57.4402	53.8896	59.5136	52.441	51.6247	23.6302	35.5457	26.4822
EVM0016124	0.500517	turquoise	PREDICTED: protein ENHANCED DISEASE RESISTANCE 2-like isoform X1 [Vitis vinifera]		2.13649	4.21495	7.9902	4.89877	16.6581	13.1139	12.127	14.4681	1.23006	2.99592	7.6656
EVM0015674	0.558311	turquoise	PREDICTED: putative F-box protein At1g49610 [Nelumbo nucifera]		1.65025	1.4269	2.92041	2.3494	2.2555	2.23053	9.04594	3.0806	1.31298	1.31015	1.73941
EVM0019609	0.548983	turquoise	PREDICTED: dihydrolipoyllysine-residue succinyltransferase component of 2-oxoglutarate dehydrogenase complex 2, mitochondrial-like [Juglans regia]		63.1755	86.8145	94.2877	67.666	149.18	132.862	149.77	138.683	44.1812	89.8965	65.5053
Liquidambar_formosana_newGene_13105	0.837731	turquoise	uncharacterized protein LOC111986453 isoform X2 [Quercus suber]		2.00817	3.7344	3.0176	2.74724	2.4624	3.19315	3.81821	3.65001	0.561876	1.18418	1.52288
EVM0025221	0.782366	turquoise	protein SRC2 [Quercus suber]		361.576	460.958	206.986	260.391	537.341	647.839	664.948	531.786	13.7031	171.324	16.4554
EVM0024173	0.859508	turquoise	PREDICTED: protein LEO1 homolog isoform X2 [Vitis vinifera]		48.4105	48.2499	37.2678	43.2484	44.1441	50.5613	50.581	50.9533	24.4395	27.3547	34.5394
EVM0024177	0.587888	turquoise	tryptophan--tRNA ligase, cytoplasmic isoform X2 [Durio zibethinus]		42.8933	49.9658	42.6861	30.5458	57.6811	68.9348	54.1662	51.3845	30.3242	42.1279	32.87
EVM0006046	0.643646	turquoise	aldose 1-epimerase-like [Hevea brasiliensis]		11.8836	7.43439	3.89823	1.99583	8.74456	5.77024	4.70888	3.86886	0.749408	0.889607	0.610182
Liquidambar_formosana_newGene_4645	0.59464	turquoise	PREDICTED: uncharacterized protein LOC100267991 [Vitis vinifera]		1.04932	5.45289	2.26253	0.0381217	3.16594	3.23907	3.477	2.47783	0.174116	0.0873543	0.0178173
EVM0006785	0.764795	turquoise	PREDICTED: uncharacterized WD repeat-containing protein C2A9.03 [Vitis vinifera]		34.845	41.2855	36.7235	35.9578	27.9819	27.5213	35.0817	30.8495	14.0861	22.9016	21.5109
EVM0004312	0.699473	turquoise	pentatricopeptide repeat-containing protein At4g21705, mitochondrial-like [Quercus suber]		9.00611	9.51443	8.65826	10.1436	7.09163	8.63201	8.38267	7.22372	2.92402	4.6191	5.0716
Liquidambar_formosana_newGene_2723	0.800367	turquoise	#N/A		0.346812	1.47369	1.44465	2.23132	0.988656	1.75527	1.28299	1.90726	0	0.0832983	0.20138
EVM0000205	0.694031	turquoise	PREDICTED: transcription factor MYB108 [Vitis vinifera]		2.7545	9.78768	21.8575	15.6472	15.2824	24.4471	22.56	23.3235	0.980445	2.94637	1.58947
EVM0001844	0.686993	turquoise	LEAF RUST 10 DISEASE-RESISTANCE LOCUS RECEPTOR-LIKE PROTEIN KINASE-like 1.2 isoform X2 [Manihot esculenta]		29.2962	26.4885	21.524	22.4254	57.2871	47.8734	54.4075	53.2406	9.63269	18.0061	2.96339
Liquidambar_formosana_newGene_3457	0.796802	turquoise	signal recognition particle 14 kDa protein-like [Quercus suber]		1.78112	2.60932	1.57696	1.52707	1.32823	2.00356	1.85481	1.90271	0.220527	0.61785	0.352077
EVM0007669	0.64654	turquoise	protein PIN-LIKES 2-like [Hevea brasiliensis]		35.3587	30.5596	22.8112	38.5354	26.2952	24.0913	25.2503	25.682	20.1598	19.1031	20.3537
Liquidambar_formosana_newGene_1917	0.616988	turquoise	PREDICTED: AT-rich interactive domain-containing protein 1 [Vitis vinifera]		15.2925	15.4907	26.7769	26.0252	14.7449	12.9336	14.6032	17.5584	7.65554	10.7826	10.7935
Liquidambar_formosana_newGene_8768	0.644203	turquoise	hypothetical protein VITISV_007623 [Vitis vinifera]		0.887305	2.42899	2.49558	2.4724	2.04165	2.62381	1.69124	2.42865	1.12669	1.14238	1.35187
EVM0027193	0.904626	turquoise	PREDICTED: ubiquitin carboxyl-terminal hydrolase 9 [Vitis vinifera]		39.5759	51.3112	57.4327	51.2658	48.9765	47.2877	45.9256	44.5271	21.706	28.7095	28.0815
Liquidambar_formosana_newGene_218	0.818935	turquoise	ribosomal protein S4 (mitochondrion) [Cucumis melo subsp. melo]		1.41842	1.86947	0.825994	1.79902	1.80927	1.84942	1.92521	2.078	0.388975	0.477967	0.962785
Liquidambar_formosana_newGene_216	0.744594	turquoise	LOW QUALITY PROTEIN: peroxidase domain-containing protein, partial [Cephalotus follicularis]		3.02844	3.9887	2.76743	5.70527	3.01893	2.02045	3.2093	2.84585	0.59143	2.31268	0.868177
EVM0020873	0.80489	turquoise	PREDICTED: Fanconi anemia group D2 protein homolog isoform X1 [Vitis vinifera]		1.5864	3.00471	2.39441	1.56712	3.66777	4.18722	2.78989	3.19049	0.062773	0.224456	0.604183
Liquidambar_formosana_newGene_13347	0.794913	turquoise	subtilisin-like protease SBT5.4 [Prunus avium]		0.257911	0.567357	0.295962	0.508691	0.821463	0.777558	0.609952	0.530672	0.0235937	0.112263	0.173927
EVM0013775	0.827356	turquoise	PREDICTED: putative F-box protein At1g49610 [Nelumbo nucifera]		11.6098	10.3859	8.46879	10.2065	10.0522	12.4718	13.4015	14.4305	3.40241	4.81042	6.28072
Liquidambar_formosana_newGene_13695	0.671803	turquoise	#N/A		0.471998	1.38803	1.12668	0.992218	1.14722	1.30112	1.41541	1.76788	0.272223	0.861028	0.712524
EVM0026310	0.784267	turquoise	hypothetical protein VITISV_022963 [Vitis vinifera]		1.50313	1.66945	1.52943	1.86099	1.76603	2.29677	1.4303	1.55188	0.339221	1.16477	0.739155
EVM0014011	0.559337	turquoise	PREDICTED: homeobox-leucine zipper protein ANTHOCYANINLESS 2 isoform X2 [Vitis vinifera]		0.223191	5.25078	8.76821	6.29695	10.5315	8.75086	6.55798	6.30124	5.2768	0.0951367	1.13091
EVM0019292	0.719401	turquoise	PREDICTED: dolichyl-diphosphooligosaccharide--protein glycosyltransferase subunit 2-like [Juglans regia]		72.5737	73.2174	58.4678	65.6676	61.5133	89.0414	59.6008	58.6204	34.0982	59.0726	49.0598
EVM0019324	0.926483	turquoise	PREDICTED: kinetochore protein ndc80 [Vitis vinifera]		4.61168	5.19228	6.01051	5.33339	5.80412	6.66328	6.51509	6.40384	0.334411	1.02674	1.06498
Liquidambar_formosana_newGene_8554	0.800085	turquoise	PREDICTED: taxane 13-alpha-hydroxylase [Theobroma cacao]		3.92925	5.40832	3.54867	5.84609	2.95988	3.38955	3.21465	3.21498	0.351878	0.267489	1.01797
EVM0024404	0.778272	turquoise	PREDICTED: metallophosphoesterase 1 isoform X1 [Theobroma cacao]		5.33517	8.71479	5.97795	10.1347	4.73376	6.50799	5.97151	6.45594	1.44339	1.72007	2.72718
EVM0023751	0.141805	turquoise	hypothetical protein GOBAR_AA34591 [Gossypium barbadense]		1.82213	1.1264	0.741794	1.92971	1.90088	1.96991	2.12931	2.25487	1.15501	1.48029	1.84562
Liquidambar_formosana_newGene_14124	0.698132	turquoise	cold-regulated 413 plasma membrane protein 4-like [Manihot esculenta]		3.23383	4.54245	3.46539	4.05368	4.79822	3.07671	2.85806	1.75886	0.0428673	0.564654	0.696838
Liquidambar_formosana_newGene_14121	0.746303	turquoise	hypothetical protein CISIN_1g030964mg [Citrus sinensis]		50.358	76.8541	63.8405	77.1773	58.9387	85.729	40.8438	42.1313	23.5218	29.9921	31.3469
EVM0003427	0.839558	turquoise	PREDICTED: histone-lysine N-methyltransferase ATX4 isoform X2 [Vitis vinifera]		10.0198	17.4069	16.7068	21.482	19.1426	18.632	17.5118	17.9772	9.13087	9.27851	8.62876
EVM0018458	0.804488	turquoise	PREDICTED: uncharacterized protein LOC100264564 isoform X1 [Vitis vinifera]		11.2564	14.6782	17.5306	14.0622	12.2517	12.9022	11.6411	10.4548	3.25749	5.54859	5.32439
EVM0021864	0.933024	turquoise	PREDICTED: serrate RNA effector molecule isoform X1 [Vitis vinifera]		32.206	32.3141	32.2687	31.9132	34.6476	37.4495	27.1284	29.0616	18.3835	22.9534	20.0044
EVM0021861	0.907299	turquoise	PREDICTED: RNA-binding protein 25 isoform X2 [Vitis vinifera]		74.9564	97.6551	96.3451	91.6731	120.853	115.363	107.455	116.753	36.0801	39.4434	46.0354
Liquidambar_formosana_newGene_6806	0.85929	turquoise	sterol c-14 reductase, partial [Rhizophora mucronata]		1.62643	3.50326	2.16549	2.41823	2.23642	3.32864	3.24837	2.94393	0.572238	0.540718	1.07339
Liquidambar_formosana_newGene_12952	0.839155	turquoise	#N/A		1.46835	2.16849	2.25191	2.59327	1.78071	2.92702	2.90405	2.95911	0.369743	0.629155	1.06611
EVM0009849	0.628808	turquoise	PREDICTED: ubiquinone biosynthesis O-methyltransferase, mitochondrial [Juglans regia]		7.15338	8.7114	8.61915	6.40968	5.3729	6.51434	4.97083	5.22633	2.48397	4.92424	2.99046
EVM0009841	0.894508	turquoise	uncharacterized protein LOC112034255 isoform X2 [Quercus suber]		4.76502	4.96262	6.3698	7.57493	5.51021	5.40249	5.36558	4.69367	1.31818	2.50032	1.66668
Liquidambar_formosana_newGene_6113	0.707659	turquoise	disease resistance protein [Quercus suber]		0.989284	1.15945	1.72932	1.20192	1.11362	1.07588	1.25577	1.22807	0.109689	0.400247	0.411882
Liquidambar_formosana_newGene_6112	0.844468	turquoise	disease resistance protein [Quercus suber]		5.2434	5.47168	4.6983	5.43798	4.31769	3.40491	4.91558	5.12167	1.29585	1.97167	1.42693
Liquidambar_formosana_newGene_6115	0.768515	turquoise	PREDICTED: probable disease resistance protein At4g27220 isoform X3 [Vitis vinifera]		1.51591	1.4848	1.15879	1.31106	1.40751	1.4417	1.72589	1.76895	0.502388	0.767914	0.976117
Liquidambar_formosana_newGene_4985	0.924296	turquoise	#N/A		4.08696	5.5138	6.12563	6.95176	5.50628	5.32228	5.73012	6.64122	0.665213	1.40405	1.43385
Liquidambar_formosana_newGene_2917	0.811159	turquoise	Gag [Vitis vinifera]		0.718662	1.57749	1.74798	1.34745	1.35936	1.21229	1.17724	1.35335	0.128678	0.462581	0.196966
Liquidambar_formosana_newGene_1338	0.913583	turquoise	kinesin-like protein KIN-4C [Carica papaya]		2.06136	3.9479	4.16718	4.47383	4.72915	4.81529	4.45631	4.77118	0.337547	0.582826	0.76518
EVM0014259	0.785407	turquoise	pre-mRNA-splicing factor 18-like [Cucurbita pepo subsp. pepo]		41.3453	32.7873	25.8609	22.9528	33.066	38.8292	42.8815	32.8814	11.0251	15.8837	14.0596
EVM0000505	0.505623	turquoise	probable acyl-activating enzyme 6 isoform X1 [Hevea brasiliensis]		0.122653	0.8473	0.863738	3.97399	5.24046	6.18045	2.06119	2.16882	0.453298	0.048879	0.514683
EVM0015063	0.760877	turquoise	uncharacterized protein LOC112023817 [Quercus suber]		4.17884	7.00656	13.5534	6.65216	11.9129	11.5865	12.4929	12.7081	1.09815	3.70991	2.1958
EVM0015613	0.806612	turquoise	PREDICTED: uncharacterized protein LOC100245077 isoform X1 [Vitis vinifera]		4.58439	8.71568	7.84044	7.55891	10.465	9.49027	9.1791	12.0615	2.51046	3.84708	4.13396
EVM0012960	0.856628	turquoise	PREDICTED: BTB/POZ and MATH domain-containing protein 3 isoform X1 [Vitis vinifera]		51.0648	44.6818	42.0787	46.5584	43.7741	45.468	47.0513	53.6321	29.4743	33.6268	31.9004
EVM0004506	0.697796	turquoise	PREDICTED: nestin isoform X2 [Vitis vinifera]		6.48616	5.92208	4.97078	8.09108	4.59406	4.31068	3.55222	3.81744	0.723078	1.44515	2.65968
EVM0008168	0.62107	turquoise	PREDICTED: RNA polymerase I-specific transcription initiation factor rrn3 [Vitis vinifera]		5.89224	7.44848	4.69602	8.09316	4.20269	4.16732	5.02793	6.34241	2.83768	2.14796	4.22834
EVM0001340	0.71103	turquoise	hypothetical protein CCACVL1_13641 [Corchorus capsularis]		0.083414	0.807063	0.818122	0.753185	1.04079	2.34222	0.816788	0.509333	0.027848	0.101933	0.112658
EVM0012342	0.825421	turquoise	PREDICTED: uncharacterized protein LOC100257358 isoform X1 [Vitis vinifera]		12.4083	18.9227	28.9837	20.1808	25.8802	27.6434	29.7434	28.7113	6.97581	7.41575	6.20956
EVM0012343	0.690484	turquoise	PREDICTED: autophagy-related protein 9 [Ricinus communis]		13.5193	16.4948	21.6822	26.7475	22.798	19.7586	26.3824	23.5309	11.2883	19.3754	12.8751
EVM0002213	0.832994	turquoise	PREDICTED: nuclear cap-binding protein subunit 1 isoform X2 [Vitis vinifera]		26.5708	33.2184	22.7281	23.4082	29.072	38.0449	28.9683	27.837	14.2358	16.3181	21.4589
Liquidambar_formosana_newGene_11848	0.638354	turquoise	--		1.02208	14.7265	7.69063	21.2277	11.7444	5.58513	15.6926	5.43328	0	1.68871	0.494003
EVM0007363	0.669	turquoise	WD40 domain-containing protein [Cephalotus follicularis]		31.0938	43.4071	75.4151	53.0171	64.5282	40.2309	56.0545	59.3726	21.0908	30.4436	33.4387
Liquidambar_formosana_newGene_8538	0.78578	turquoise	PREDICTED: uncharacterized protein LOC107423264 isoform X2 [Ziziphus jujuba]		1.69287	2.11105	1.96177	3.12955	2.25215	2.02967	2.90361	3.42997	0.602801	0.847504	0.926072
EVM0017444	0.801747	turquoise	PREDICTED: polycomb group protein EMBRYONIC FLOWER 2 isoform X1 [Vitis vinifera]		14.879	22.1868	20.5345	20.4183	25.4361	24.7486	17.111	17.0604	12.5203	12.6144	10.4899
EVM0017447	0.892027	turquoise	PREDICTED: protein XAP5 CIRCADIAN TIMEKEEPER isoform X1 [Nelumbo nucifera]		26.7452	29.0007	24.988	27.8699	31.8741	38.1578	35.3613	35.6937	11.3265	15.8704	14.1489
EVM0022299	0.778235	turquoise	proliferating cell nuclear antigen [Quercus suber]		58.3486	64.0946	49.7872	46.4748	47.0038	54.006	38.277	33.3384	13.1088	27.7749	21.2389
EVM0016672	0.643356	turquoise	26S proteasome non-ATPase regulatory subunit 11 [Theobroma cacao]		19.0576	22.6027	19.2819	23.4538	15.0956	17.9511	12.7098	13.2697	7.03459	12.5454	9.71984
EVM0027769	0.824334	turquoise	PREDICTED: MATH domain-containing protein At5g43560-like isoform X2 [Nelumbo nucifera]		42.8352	46.7659	42.5054	44.9501	60.1703	55.3396	55.333	58.186	28.3729	24.5939	28.3103
EVM0020931	0.794174	turquoise	PREDICTED: MATH domain-containing protein At5g43560-like isoform X2 [Prunus mume]		36.7732	35.6048	23.6959	31.3435	44.463	42.5695	52.6977	54.798	12.5249	14.9208	16.9516
EVM0014938	0.729061	turquoise	hypothetical protein POPTR_0002s22840g [Populus trichocarpa]		125.065	72.7589	144.781	110.351	92.198	87.9991	86.0816	76.624	11.842	83.1284	14.4407
EVM0022272	0.839853	turquoise	#N/A		9.06903	7.75727	5.72536	6.72221	6.19849	8.00498	7.88909	8.62428	3.29841	3.79195	3.64507
EVM0022270	0.527051	turquoise	hypothetical protein POPTR_0010s24510g [Populus trichocarpa]		38.2242	54.0178	49.9904	39.7236	24.5461	19.2784	6.15583	3.60156	0.282201	18.6219	3.58212
EVM0028686	0.893722	turquoise	Polyribonucleotide nucleotidyltransferase [Trema orientalis]		23.4667	22.6857	20.3033	20.1899	20.1354	22.9912	19.3994	17.6299	8.03655	14.5161	11.3103
Liquidambar_formosana_newGene_6212	0.738947	turquoise	Cyclin [Macleaya cordata]		1.94865	3.55476	2.85848	5.27474	2.28844	2.72344	3.05446	3.53253	0.416947	0.844254	2.03361
EVM0028354	0.9536	turquoise	PREDICTED: ARM REPEAT PROTEIN INTERACTING WITH ABF2 isoform X2 [Theobroma cacao]		29.072	29.3211	31.7467	31.1522	33.2092	29.9205	30.4183	30.5603	7.55312	16.0701	17.5362
Liquidambar_formosana_newGene_7163	0.598685	turquoise	PREDICTED: protein SRC2-like [Vitis vinifera]		1.72197	0.441375	1.74205	0.829854	0.965531	1.01066	1.69822	1.38692	0	0.204496	0.208741
EVM0020106	0.900411	turquoise	PREDICTED: probable mitochondrial intermediate peptidase, mitochondrial [Vitis vinifera]		9.77621	11.8701	12.5821	10.7824	12.2834	14.0354	11.7139	11.7153	4.04946	4.14061	5.16546
Liquidambar_formosana_newGene_10162	0.698675	turquoise	--		4.75374	5.53244	4.30081	6.80129	3.27782	3.7057	4.55729	3.82727	0.881458	0.746924	2.34317
EVM0012042	0.577673	turquoise	basic leucine zipper 23-like isoform X2 [Hevea brasiliensis]		22.2726	20.8737	24.8199	26.2524	30.9312	37.0867	31.8319	30.604	16.1537	21.2542	17.5081
EVM0008367	0.633889	turquoise	uncharacterized protein LOC111291340 [Durio zibethinus]		14.6224	21.9752	32.3883	20.1302	32.6171	22.0693	18.4361	23.307	14.0306	3.96045	8.36801
EVM0008362	0.878057	turquoise	DUF4283 domain-containing protein, partial [Cephalotus follicularis]		3.05715	3.47813	2.26506	4.50887	3.16734	4.0021	3.60656	3.42402	0.154833	0.47091	0.905908
EVM0008985	0.757635	turquoise	PREDICTED: carbon catabolite repressor protein 4 homolog 5 isoform X1 [Vitis vinifera]		3.22362	5.27649	5.88228	5.17898	6.05646	5.77646	3.51484	3.37704	2.17363	1.88568	1.81198
EVM0005051	0.700123	turquoise	hypothetical protein VITISV_031318 [Vitis vinifera]		3.8226	4.26739	2.92928	4.43744	5.10931	8.05338	9.48188	7.27174	1.39015	2.46727	2.87951
EVM0005054	0.876166	turquoise	PREDICTED: uncharacterized protein LOC100261309 [Vitis vinifera]		10.4099	10.1738	6.7682	13.0897	11.2971	10.6258	10.4818	10.5338	3.40414	4.58837	4.2688
Liquidambar_formosana_newGene_2895	0.668806	turquoise	#N/A		4.46849	6.16188	4.74708	10.8863	4.87142	4.75958	5.89358	6.50167	1.76214	1.81332	3.41968
Liquidambar_formosana_newGene_2898	0.865786	turquoise	uncharacterized protein LOC111477194 isoform X1 [Cucurbita maxima]		5.14316	6.20077	4.20861	7.06708	4.10568	6.10168	4.38186	5.30844	1.34959	1.35413	2.64366
EVM0026167	0.604379	turquoise	PREDICTED: homeobox-leucine zipper protein HDG2 isoform X4 [Vitis vinifera]		0.315303	63.3801	44.1228	65.201	61.8257	40.1667	40.6172	36.4094	19.3226	0.038779	4.51377
EVM0026161	0.7518	turquoise	PREDICTED: transcription factor GTE9 isoform X1 [Vitis vinifera]		47.1733	55.3035	57.0414	55.5258	83.3857	87.178	100.136	85.1717	27.9663	35.8288	34.8317
EVM0026168	0.812551	turquoise	PREDICTED: cell division cycle protein 48 homolog [Vitis vinifera]		194.75	175.975	151.341	168.435	144.297	199.253	157.847	158.981	88.4529	131.046	86.9176
EVM0021217	0.806733	turquoise	probable nucleoredoxin 1 [Quercus suber]		7.75058	11.4862	6.37214	13.5393	7.52337	8.84573	9.62328	9.70135	2.8212	3.00957	6.54392
EVM0009017	0.763153	turquoise	PREDICTED: ethylene-responsive transcription factor ABI4 [Theobroma cacao]		0.305067	25.3069	28.9805	24.3673	38.0902	42.3087	41.6989	38.5646	0	0.023435	0.181684
EVM0002807	0.726652	turquoise	PREDICTED: uncharacterized protein LOC103341623 [Prunus mume]		0.109149	0.453331	0.674669	1.02831	0.996402	0.562259	0.873921	0.80633	0.00851867	0.0186697	0.005554
EVM0003049	0.66097	turquoise	PREDICTED: importin-4 isoform X1 [Vitis vinifera]		33.6333	29.2036	30.8067	26.499	31.7965	34.1469	36.3266	38.7535	18.7661	23.6507	30.5741
EVM0029246	0.731456	turquoise	PREDICTED: monoterpene synthase [Ricinus communis]		3.54064	5.03223	3.08314	4.42593	3.44465	4.23948	5.25234	5.70115	1.15642	1.80866	4.33773
EVM0009110	0.660241	turquoise	PREDICTED: FHA domain-containing protein DDL isoform X1 [Vitis vinifera]		44.3976	45.0355	32.0732	32.6798	39.0394	47.3758	48.3111	42.1879	29.4286	27.7453	32.2067
EVM0029249	0.854972	turquoise	PREDICTED: DNA repair protein recA homolog 2, mitochondrial [Juglans regia]		3.09373	3.46935	2.1737	4.2196	2.44404	3.11118	4.33171	4.39689	0.753372	0.791705	1.22375
EVM0028117	0.883484	turquoise	PREDICTED: uncharacterized protein LOC102615295 isoform X1 [Citrus sinensis]		39.3142	42.4507	44.2388	50.5201	44.6258	49.6695	50.7176	47.2802	26.9702	26.3041	27.1769
EVM0015792	0.567938	turquoise	PREDICTED: ankyrin repeat-containing protein At3g12360 [Theobroma cacao]		15.0048	3.31165	6.54309	2.14433	7.53226	12.5318	8.25874	12.3832	2.58603	1.4415	1.25237
EVM0015791	0.791584	turquoise	unnamed protein product, partial [Vitis vinifera]		5.39093	4.96888	5.39646	6.41757	3.82749	4.39406	4.06846	4.31002	0.536304	2.28318	2.26432
EVM0006630	0.862505	turquoise	PREDICTED: casein kinase 1-like protein HD16 isoform X1 [Nelumbo nucifera]		70.9395	89.7096	75.9163	78.5529	87.6768	96.1475	88.4661	79.5627	48.8801	59.1934	55.4757
EVM0002397	0.743133	turquoise	PREDICTED: uncharacterized protein LOC100267367 isoform X1 [Vitis vinifera]		34.4027	38.9562	21.9848	30.5001	37.6	44.9333	44.3307	39.5455	21.2405	19.8574	23.7756
EVM0015424	0.743662	turquoise	PREDICTED: DNA-directed RNA polymerase I subunit 2 isoform X2 [Vitis vinifera]		18.747	29.8332	17.5126	16.5458	22.6019	33.2175	25.2546	23.8808	10.9963	14.428	16.2167
EVM0015427	0.59789	turquoise	DNA damage-binding protein 1a isoform X1 [Citrus clementina]		0.006152	0.170184	0.137923	0.463791	0.208379	0.100634	0.18868	0.516742	0	0	0
EVM0024911	0.377914	turquoise	PREDICTED: nicotinate phosphoribosyltransferase 2 isoform X2 [Vitis vinifera]		19.8457	25.0185	25.6498	17.3306	21.1628	22.1227	22.3706	27.5137	20.6244	20.0006	14.9425
EVM0024915	0.80555	turquoise	hypothetical protein L484_026278 [Morus notabilis]		37.2032	40.3263	43.7078	41.1994	51.6395	52.6679	58.0116	55.1449	27.0667	26.686	28.3418
EVM0019681	0.789249	turquoise	hypothetical protein POPTR_0001s31750g [Populus trichocarpa]		41.9655	52.5924	51.4792	16.9206	34.0923	35.1628	26.2687	18.7857	0.037328	2.19174	1.89803
EVM0019688	0.819183	turquoise	PREDICTED: uncharacterized protein LOC107421499 [Ziziphus jujuba]		4.53171	6.58633	3.86583	3.17908	4.47003	4.80581	4.42588	3.72494	0.404451	0.821263	1.86742
EVM0013068	0.823937	turquoise	tRNA (guanine(9)-N1)-methyltransferase [Morus notabilis]		18.1616	26.0192	18.181	16.9091	20.4832	32.8229	21.4227	17.9071	2.96925	7.74967	6.19092
EVM0013062	0.898872	turquoise	PREDICTED: pre-mRNA-splicing factor ATP-dependent RNA helicase DEAH7 [Vitis vinifera]		24.7576	20.11	17.6653	22.815	23.8052	21.2714	20.6589	18.9575	10.1971	10.164	11.7448
EVM0026405	0.678725	turquoise	PREDICTED: uncharacterized protein LOC105137957 isoform X5 [Populus euphratica]		4.22855	6.52505	5.80956	4.97069	4.17336	5.73903	3.87376	3.74517	1.25913	3.12531	2.63204
EVM0006227	0.328609	turquoise	PREDICTED: cysteine-rich receptor-like protein kinase 2 [Vitis vinifera]		7.65359	17.5509	17.9942	7.07714	36.9879	31.9453	30.4324	27.2698	12.5657	22.3445	5.37621
EVM0013683	0.621725	turquoise	#N/A		0.687014	0.77681	0.829918	1.31311	0.846862	1.58829	1.50528	1.82045	0.0454957	0.0635443	1.27979
EVM0020760	0.783312	turquoise	#N/A		4.89446	10.0835	6.61928	9.01868	8.61235	8.90023	10.4233	12.512	2.62327	3.60355	5.0117
EVM0020769	0.64887	turquoise	PREDICTED: uncharacterized protein LOC100248664 isoform X1 [Vitis vinifera]		5.40939	8.96044	6.67644	5.29076	6.95676	11.3531	10.1241	10.0473	4.35905	4.34092	4.47549
EVM0028259	0.907916	turquoise	tRNA-dihydrouridine(16/17) synthase [NAD(P)(+)]-like [Jatropha curcas]		16.8706	20.4341	16.0723	14.743	20.6041	21.4269	18.6676	14.4746	7.16058	8.43761	6.48687
EVM0010081	0.707397	turquoise	PREDICTED: ubiquitin-conjugating enzyme E2-23 kDa-like [Daucus carota subsp. sativus]		24.5611	35.8061	21.07	27.0787	35.0032	37.1085	29.1872	31.2411	7.1624	26.3964	23.3876
EVM0010080	0.815988	turquoise	PREDICTED: ribosomal RNA small subunit methyltransferase NEP1-like [Pyrus x bretschneideri]		25.3505	31.0964	21.3272	30.1223	26.3682	27.0043	29.915	29.6337	12.497	17.0109	21.5778
EVM0011357	0.837206	turquoise	PREDICTED: zinc finger HIT domain-containing protein 2 isoform X1 [Vitis vinifera]		6.84099	8.4789	8.33686	7.16261	6.74924	9.18638	6.38969	6.83917	2.40676	3.321	3.42331
EVM0011355	0.870149	turquoise	PREDICTED: protein XAP5 CIRCADIAN TIMEKEEPER isoform X1 [Nelumbo nucifera]		21.1885	24.2326	23.0811	23.4036	28.5758	32.504	31.5956	30.6162	8.98413	14.7338	12.9346
EVM0025848	0.696977	turquoise	PREDICTED: probable protein phosphatase 2C 46 [Juglans regia]		25.4359	33.3322	31.0972	34.1954	45.2861	43.1209	46.3152	48.0147	23.3464	24.8003	19.586
EVM0025841	0.686866	turquoise	E3 ubiquitin-protein ligase RNF12-A-like [Prunus avium]		13.8588	24.3756	21.4956	18.5352	33.7121	37.1646	47.7001	42.6902	9.34024	12.923	11.4147
EVM0023442	0.635285	turquoise	UPF0481 protein At3g47200-like [Manihot esculenta]		0	1.32238	0.38977	2.0797	2.21978	4.95993	1.32967	0.848055	0.0173443	0	0.0737627
EVM0001627	0.774146	turquoise	PREDICTED: uncharacterized protein LOC100255461 [Vitis vinifera]		14.0184	15.5155	11.1451	18.5085	11.7736	14.6182	12.4856	10.5542	4.48449	5.52757	6.51212
Liquidambar_formosana_newGene_5192	0.64414	turquoise	PREDICTED: uncharacterized protein At1g04910 [Eucalyptus grandis]		6.87494	9.78271	10.1462	7.86449	9.91243	11.5211	12.5574	13.0716	3.47817	6.06141	7.66121
EVM0000282	0.414634	turquoise	PREDICTED: uncharacterized protein LOC107418888 [Ziziphus jujuba]		12.222	7.8423	9.64726	6.87204	9.88231	9.06898	10.9061	8.71712	7.96009	9.38737	2.8337
Liquidambar_formosana_newGene_1449	0.632077	turquoise	Cleavage and polyadenylation specificity factor 160 isoform 1 [Theobroma cacao]		0.375632	0.737719	0.30027	0.88549	0.620694	0.582331	0.776367	0.58658	0.0958833	0.152102	0.513593
Liquidambar_formosana_newGene_1996	0.879516	turquoise	#N/A		5.47651	8.78068	8.12094	6.37225	5.99594	8.2751	6.75404	6.33028	2.59637	2.8676	2.72242
EVM0006530	0.756233	turquoise	PREDICTED: F-box/LRR-repeat protein At4g14103 [Vitis vinifera]		0.402396	3.30536	1.5952	4.48235	2.41535	3.60155	4.11561	3.96217	0.0120233	0.192641	1.54452
EVM0006531	0.787611	turquoise	poly [adp-ribose] polymerase 2 [Quercus suber]		15.0075	21.6607	9.52171	10.2877	11.6284	14.2612	16.4853	10.0745	3.36494	3.57909	4.23013
EVM0027114	0.827023	turquoise	uncharacterized protein LOC111984714 [Quercus suber]		4.71539	6.57074	4.181	4.80326	4.03662	5.40715	3.95866	3.88334	1.09321	1.58323	2.5691
EVM0027116	0.73933	turquoise	Plastid division protein PDV2, putative [Theobroma cacao]		4.37934	4.33743	3.09768	4.49882	3.67342	4.95708	4.33794	4.23912	2.0193	2.97067	2.52628
EVM0027113	0.374385	turquoise	hypothetical protein GOBAR_DD03713 [Gossypium barbadense]		3.67034	5.10601	4.97202	4.10458	7.3398	10.4706	8.61058	7.94641	6.45856	4.2655	3.73929
EVM0006283	0.639875	turquoise	PREDICTED: F-box/kelch-repeat protein At3g23880-like isoform X2 [Nicotiana tomentosiformis]		2.36396	2.92985	3.84149	2.39794	3.32561	3.02779	4.0416	3.71147	0.373123	2.40265	2.14209
EVM0005396	0.585076	turquoise	PREDICTED: aldo-keto reductase family 4 member C9 [Ricinus communis]		1.83899	2.92604	2.99711	5.7498	9.49926	8.21414	10.53	7.73457	1.39338	4.59514	1.41359
EVM0005392	0.763603	turquoise	PREDICTED: probable adenylate kinase 1, chloroplastic [Nelumbo nucifera]		31.8892	28.3675	27.5316	22.5933	28.7583	40.4299	24.1274	23.7075	7.21229	20.2456	15.3903
EVM0016947	0.776353	turquoise	PREDICTED: DNA-directed RNA polymerase I subunit RPA12-like [Nelumbo nucifera]		23.8562	27.4168	23.7678	20.0733	24.9842	34.4765	28.1053	27.2893	11.1522	15.954	16.7193
EVM0016948	0.580393	turquoise	PREDICTED: E3 ubiquitin-protein ligase RNF181-like [Ziziphus jujuba]		29.9696	19.9904	13.2735	22.2959	41.3736	50.0392	35.9083	35.916	14.1624	11.2575	13.8989
Liquidambar_formosana_newGene_8104	0.801965	turquoise	#N/A		1.97572	3.26136	2.78247	3.90119	2.94684	3.01243	3.16559	2.58996	0.395486	0.355037	0.994505
EVM0026396	0.633088	turquoise	Skp1 domain-containing protein/Skp1_POZ domain-containing protein [Cephalotus follicularis]		30.204	30.5717	21.7588	26.7319	17.198	15.9386	8.4996	6.27395	0.708749	7.71886	3.26319
EVM0026393	0.870737	turquoise	Fanconi anemia group J protein homolog [Quercus suber]		2.29572	2.72105	3.74628	3.64308	3.22481	2.81365	4.06879	3.91968	0.645584	0.703925	1.8901
EVM0004117	0.656579	turquoise	Prenyltransferase/squalene oxidase [Macleaya cordata]		2.0216	2.83552	2.20643	1.78597	1.89662	1.89697	1.78867	1.50309	0.568724	0.887457	0.771875
EVM0004118	0.869102	turquoise	PREDICTED: SURP and G-patch domain-containing protein 1-like protein isoform X1 [Vitis vinifera]		89.6234	110.865	116.457	120.958	134.474	129.941	141.217	150.764	54.1083	67.0512	72.3699
EVM0010242	0.849583	turquoise	PREDICTED: metallophosphoesterase 1 [Vitis vinifera]		25.2324	28.4814	30.6343	26.0707	24.9674	28.7789	27.2872	25.9708	7.00246	15.0301	9.75577
EVM0029162	0.94297	turquoise	PREDICTED: protein HIRA isoform X1 [Vitis vinifera]		12.1971	20.5314	14.0822	16.155	17.1556	21.1623	17.1358	16.4331	6.19465	7.36756	9.0945
EVM0029161	0.819014	turquoise	PREDICTED: uncharacterized protein At2g02148 isoform X1 [Nelumbo nucifera]		7.54665	8.30633	9.41832	9.13531	8.44388	9.24672	8.84209	9.15394	3.95942	4.87088	5.88279
EVM0029169	0.857812	turquoise	PREDICTED: tetratricopeptide repeat protein SKI3 isoform X2 [Vitis vinifera]		19.4192	22.4325	20.9051	20.6844	24.4646	26.192	24.2038	27.4087	11.6812	11.9019	12.5185
EVM0014636	0.685367	turquoise	PREDICTED: probable low-specificity L-threonine aldolase 1 [Vitis vinifera]		17.9128	15.6285	11.5008	13.861	26.1765	23.1791	28.7218	29.4656	2.84992	7.97987	16.8457
EVM0014634	0.794209	turquoise	PREDICTED: F-box/LRR-repeat protein At3g26922 [Vitis vinifera]		10.9423	10.1829	6.45602	8.45821	11.3002	8.60012	8.51455	8.30283	1.80449	5.12812	4.98455
EVM0018982	0.809908	turquoise	small ubiquitin-related modifier 2-like, partial [Helianthus annuus]		37.4351	60.9974	40.9906	43.5719	53.8469	61.9756	69.6221	53.3876	25.7719	31.4996	24.3391
EVM0013185	0.847199	turquoise	serine/threonine-protein kinase 38-like [Manihot esculenta]		28.8184	37.9607	27.4531	25.3243	27.0827	35.1776	35.0595	34.3447	14.5151	14.2121	19.5558
EVM0013182	0.737689	turquoise	PREDICTED: probable glycosyltransferase At5g03795 [Vitis vinifera]		5.53842	4.24939	4.2922	7.36771	4.81384	4.65458	6.04219	5.59198	2.27976	3.79983	2.03123
EVM0013189	0.870623	turquoise	PREDICTED: putative pentatricopeptide repeat-containing protein At1g16830 [Theobroma cacao]		8.47054	11.1571	7.71839	10.0737	11.437	16.8409	11.9067	14.3772	2.98951	2.39858	4.30855
EVM0027258	0.800136	turquoise	PREDICTED: uncharacterized protein LOC100248207 [Vitis vinifera]		77.8584	81.4479	45.4539	90.7009	87.9973	84.0492	102.84	85.138	40.7661	51.4833	33.0892
EVM0017759	0.707966	turquoise	PREDICTED: endochitinase A isoform X1 [Vitis vinifera]		4.29719	3.99323	3.20465	2.82647	4.03792	4.74308	4.3368	4.36796	0.215102	0.923712	1.94466
EVM0017753	0.789316	turquoise	PREDICTED: homeobox-leucine zipper protein HOX11 [Vitis vinifera]		17.4384	45.0659	40.3468	45.1938	47.3758	62.7777	40.9155	26.2687	11.5796	15.4513	9.71346
EVM0010764	0.360074	turquoise	GCK [Trema orientalis]		18.5375	15.0047	18.1277	7.63851	13.1109	20.0306	12.9396	12.6802	4.51344	13.1858	6.06948
EVM0010767	0.865623	turquoise	Raffinose synthase [Corchorus capsularis]		4.14307	7.73401	6.187	7.70183	8.62812	6.42519	6.98757	8.1359	2.21901	2.42342	3.33702
EVM0023964	0.913442	turquoise	protein GLC8 [Manihot esculenta]		24.0455	35.0563	25.6365	31.763	30.3431	35.8305	35.3589	35.8092	10.6906	20.2577	18.8935
EVM0023967	0.757395	turquoise	PREDICTED: uncharacterized protein LOC18614122 [Theobroma cacao]		21.6044	40.344	27.5703	31.5468	38.3642	41.8887	34.9058	32.3708	19.7113	14.8911	9.79702
EVM0018179	0.871397	turquoise	PREDICTED: BRCA1-associated protein [Juglans regia]		18.1022	25.0882	25.9495	23.5813	24.3153	26.9686	25.3074	23.7185	9.05602	13.3188	8.65298
EVM0025492	0.651577	turquoise	PREDICTED: hemK methyltransferase family member 2-like [Juglans regia]		3.57521	2.30041	2.45161	2.33182	2.59136	3.42456	3.25381	2.72871	1.4642	2.05338	1.44388
EVM0025493	0.843857	turquoise	transcription initiation factor TFIID subunit 15 [Jatropha curcas]		13.8898	9.53255	9.74165	10.9858	10.2605	9.84446	9.15837	9.61479	3.0554	5.15839	3.91766
EVM0024728	0.731226	turquoise	PREDICTED: uncharacterized protein LOC100267221 isoform X2 [Vitis vinifera]		8.25329	10.1475	5.19414	7.91465	7.44686	10.0331	9.7419	8.17061	3.60915	5.2801	6.45496
Liquidambar_formosana_newGene_4298	0.820837	turquoise	PREDICTED: transcription termination factor MTERF5, chloroplastic-like [Vitis vinifera]		10.2066	12.3651	13.4397	12.2207	9.91395	11.1478	12.0432	13.7689	4.11721	5.10369	6.56184
Liquidambar_formosana_newGene_4121	0.845985	turquoise	PREDICTED: pentatricopeptide repeat-containing protein At1g62914, mitochondrial-like isoform X1 [Nelumbo nucifera]		2.09339	2.37759	2.29342	3.04686	1.96707	2.58121	2.12869	2.60489	0.416766	1.05287	1.0575
EVM0001181	0.54874	turquoise	#N/A		0.0317757	4.27217	0.470871	8.39298	1.46948	2.18367	2.7217	5.16377	0	0	0
EVM0001454	0.748107	turquoise	methionine gamma-lyase-like [Olea europaea var. sylvestris]		11.4652	25.9753	27.1268	27.3906	25.187	29.7853	28.6789	55.8627	1.88806	8.25619	17.6041
EVM0000585	0.704723	turquoise	uncharacterized protein LOC110806575 [Carica papaya]		58.0039	52.7044	46.2204	64.1039	40.5871	40.4236	47.8698	44.8944	19.8899	28.7482	31.3873
EVM0000582	0.801619	turquoise	PREDICTED: pentatricopeptide repeat-containing protein At5g12100, mitochondrial [Vitis vinifera]		7.56333	9.41844	6.84431	7.22759	6.10585	8.79175	8.68073	8.32307	3.52088	3.9649	4.39924
EVM0012470	0.882187	turquoise	PREDICTED: pre-mRNA-splicing factor CWC22 homolog [Juglans regia]		38.5412	38.7054	24.0438	45.0057	31.2969	33.8871	34.8261	34.1436	13.2696	17.6244	16.0245
EVM0012475	0.845558	turquoise	PREDICTED: F-box/kelch-repeat protein At1g57790-like [Gossypium hirsutum]		4.62558	4.83352	2.16097	3.04171	3.91093	6.10256	4.03705	3.64109	0.212303	1.05727	1.01291
EVM0008294	0.788867	turquoise	PREDICTED: serine/threonine-protein kinase haspin homolog [Vitis vinifera]		4.27442	5.75305	2.26334	2.41671	5.49218	4.75432	4.18789	4.67754	0.0495847	0.392412	1.69099
EVM0007052	0.577685	turquoise	ras-related protein Rab11D [Carica papaya]		38.8174	30.0992	14.7093	27.2107	23.3452	27.4246	34.5203	39.4267	16.2107	17.1435	22.2285
EVM0005744	0.820933	turquoise	PREDICTED: RNA polymerase II transcription factor B subunit 2 [Vitis vinifera]		15.6787	19.4785	24.6886	20.421	18.118	21.0688	20.9091	19.8348	9.73455	10.6774	12.582
EVM0005745	0.725528	turquoise	unnamed protein product, partial [Vitis vinifera]		20.3938	18.5949	23.192	27.2576	26.5907	23.1782	22.334	23.1585	17.2297	14.2579	17.7514
EVM0006099	0.840005	turquoise	PREDICTED: uncharacterized protein LOC102609518 [Citrus sinensis]		19.4065	22.8396	19.5655	21.549	19.1952	17.8113	26.9544	28.83	9.11759	16.5132	15.5384
EVM0027851	0.88517	turquoise	PREDICTED: E4 SUMO-protein ligase PIAL2 isoform X1 [Vitis vinifera]		8.12769	9.82524	8.50691	8.85376	7.65971	10.3354	8.51665	8.38229	2.96579	3.85232	6.65247
EVM0013438	0.753926	turquoise	PREDICTED: erlin-2-B [Juglans regia]		0.283902	8.91179	6.80005	6.05937	10.485	8.48996	12.9674	11.6212	0.606975	0.34291	3.83424
EVM0013436	0.639372	turquoise	PREDICTED: RNA cytidine acetyltransferase 1 [Vitis vinifera]		27.5872	36.9688	27.7614	21.5637	36.0463	47.0925	41.3702	38.2589	18.7636	21.4133	24.4093
EVM0013431	0.740758	turquoise	F-box protein At4g22280-like isoform X1 [Quercus suber]		0.882231	2.05791	3.46711	2.23141	2.02445	2.58679	2.10553	1.86842	0.297476	0.956254	0.589065
EVM0010169	0.910368	turquoise	PREDICTED: uncharacterized protein LOC100251629 isoform X1 [Vitis vinifera]		40.5772	51.3945	41.367	46.7849	42.1504	47.2077	43.2731	42.8291	19.055	26.5151	24.8732
EVM0026053	0.832943	turquoise	cell division cycle protein 123 homolog [Herrania umbratica]		10.7927	12.293	12.6987	12.5275	10.1615	12.4922	12.032	11.4223	4.31365	7.48543	6.19111
EVM0026058	0.547405	turquoise	thioredoxin-like 3-3 isoform X1 [Carica papaya]		13.8764	28.8054	10.4757	15.9975	17.0651	19.7459	19.3024	18.4141	13.8226	13.6722	10.4755
EVM0017225	0.621475	turquoise	PREDICTED: prohibitin-3, mitochondrial [Vitis vinifera]		115.114	113.196	94.298	59.7807	76.2378	117.16	77.7867	66.2714	33.7931	57.0135	41.7267
EVM0017222	0.91	turquoise	phosphatidylinositol/phosphatidylcholine transfer protein SFH11-like isoform X2 [Hevea brasiliensis]		11.1815	14.1653	11.037	11.5056	12.4112	16.5097	19.8583	19.0551	2.89231	3.30445	4.46931
EVM0007873	0.806489	turquoise	hypothetical protein VITISV_006460 [Vitis vinifera]		66.73	76.2593	56.8738	60.2158	55.0685	67.2909	44.5168	45.3959	26.3007	45.8277	30.0378
EVM0007877	0.716231	turquoise	Tetratricopeptide repeat-like superfamily protein, putative isoform 1 [Theobroma cacao]		6.80003	8.38918	8.64636	9.32262	5.67453	7.09064	6.09047	6.51916	1.18866	3.42216	4.20879
EVM0025653	0.901131	turquoise	PREDICTED: mitochondrial import inner membrane translocase subunit TIM44-2 [Vitis vinifera]		13.1692	19.7261	17.8611	16.0846	21.6484	23.0743	22.5441	17.2661	6.56777	8.15293	5.49791
EVM0024522	0.726959	turquoise	PREDICTED: ATP-dependent DNA helicase Q-like 1 [Juglans regia]		2.78374	2.89073	3.5321	2.03127	2.59281	2.21887	2.04422	1.86817	0.465592	0.967916	1.42621
EVM0020459	0.669113	turquoise	hypothetical protein VITISV_032192 [Vitis vinifera]		24.0135	21.5917	21.7614	15.3194	16.4117	24.9577	16.2506	13.5083	4.67102	12.0747	6.75376
EVM0022969	0.785279	turquoise	Adenine nucleotide translocator [Trema orientalis]		5.05156	5.49362	4.1914	7.20643	4.2246	5.09656	4.38269	5.00981	1.62459	1.6945	2.78671
EVM0022967	0.757767	turquoise	PREDICTED: serine/threonine-protein kinase EDR1-like isoform X2 [Nelumbo nucifera]		6.0663	9.54359	9.11503	7.61135	6.50339	6.02869	5.71399	5.54614	1.76499	4.17597	3.63405
EVM0022964	0.825944	turquoise	uncharacterized protein LOC110646885 [Hevea brasiliensis]		27.3856	21.4309	25.0883	25.3658	28.2897	33.4152	25.494	22.8277	5.09801	17.962	16.5132
EVM0013222	0.82725	turquoise	PREDICTED: FRIGIDA-like protein 4a isoform X2 [Vitis vinifera]		66.2348	91.0126	71.8749	54.3253	88.8728	134.456	109.675	91.8671	19.6442	24.967	21.3909
EVM0017767	0.71594	turquoise	hypothetical protein TorRG33x02_097580 [Trema orientalis]		10.0816	11.7676	11.9452	15.4282	16.0366	14.9886	17.8609	19.6933	5.7551	6.82653	8.8762
EVM0026931	0.77178	turquoise	PREDICTED: probable serine/threonine-protein kinase WNK3 [Vitis vinifera]		16.3725	16.8701	15.6732	32.7987	18.7768	15.9919	17.5894	20.6764	6.92508	9.07295	7.00406
Liquidambar_formosana_newGene_13925	0.886665	turquoise	hypothetical protein VITISV_031391 [Vitis vinifera]		3.30367	4.49453	4.84603	5.33196	4.57402	5.58646	4.36735	5.67449	1.29798	1.08238	1.21256
Liquidambar_formosana_newGene_10291	0.614209	turquoise	#N/A		2.05103	3.59934	4.57279	5.67198	7.96158	5.9359	7.89444	6.93888	3.11211	2.9494	3.9214
EVM0016635	0.737374	turquoise	PREDICTED: trihelix transcription factor GT-1-like [Nelumbo nucifera]		17.1807	20.7011	11.5411	20.9771	15.318	19.7712	21.3819	20.2785	9.65783	9.58734	13.1957
EVM0016632	0.848372	turquoise	PREDICTED: putative receptor protein kinase ZmPK1 [Prunus mume]		1.29032	4.91693	7.27445	5.3724	4.86756	5.24588	6.73094	6.34737	0.368864	0.343495	0.244771
EVM0004098	0.835314	turquoise	PREDICTED: 3-phosphoinositide-dependent protein kinase 2 isoform X1 [Vitis vinifera]		35.3955	46.8509	42.4569	48.9086	58.7133	47.136	54.5946	55.5879	21.484	19.6533	25.7578
EVM0012193	0.750251	turquoise	autophagy-related protein 18c [Quercus suber]		27.0077	25.2405	23.0734	36.8985	22.0828	19.4888	19.3114	22.8271	7.17659	12.0562	12.644
Liquidambar_formosana_newGene_6011	0.708052	turquoise	ELMO domain-containing protein A-like [Durio zibethinus]		6.35512	5.77067	6.83903	8.91004	4.15915	4.07542	5.02148	8.18416	1.26264	1.73573	4.49163
EVM0012199	0.667684	turquoise	#N/A		4.24394	7.71623	4.41495	6.77354	4.01237	4.49959	4.12095	4.60901	1.7893	2.6431	2.45787
EVM0008902	0.770882	turquoise	PREDICTED: uncharacterized protein LOC100245449 isoform X1 [Vitis vinifera]		9.66683	18.5759	13.8627	10.7363	13.8338	17.2273	10.7028	11.2735	5.73748	9.50063	6.98528
EVM0025359	0.981166	turquoise	PREDICTED: leukotriene A-4 hydrolase homolog isoform X1 [Nelumbo nucifera]		49.3066	65.5	50.8688	54.8737	57.3677	65.7787	62.7949	56.3251	10.2866	18.4302	21.0143
EVM0007284	0.694012	turquoise	long-chain acyl-CoA synthetase 4 [Camellia oleifera]		22.3288	71.5725	79.1403	68.9685	84.4789	51.2341	57.2948	46.2898	16.2271	20.6421	14.1176
Liquidambar_formosana_newGene_5846	0.772003	turquoise	PREDICTED: serine carboxypeptidase-like 51 isoform X1 [Vitis vinifera]		5.15786	4.88399	2.75768	5.87013	5.86374	6.03252	7.81756	10.5537	0.370221	0.539398	2.25467
Liquidambar_formosana_newGene_2811	0.857006	turquoise	uncharacterized protein LOC111394888 [Olea europaea var. sylvestris]		1.58277	1.76098	2.04076	2.52058	1.56569	1.27998	1.71539	2.21055	0.41057	0.299701	0.375851
EVM0009260	0.812086	turquoise	PREDICTED: solute carrier family 25 member 44-like [Vitis vinifera]		38.8223	24.6625	29.2116	41.0808	22.8429	28.3439	25.2342	26.5228	3.82484	8.80601	11.4034
EVM0014444	0.665342	turquoise	hypothetical protein CFP56_15615 [Quercus suber]		0.114423	1.20424	0.543697	0.684542	1.87526	1.79645	1.409	0.50951	0.177498	0.0675583	0.0281633
EVM0014440	0.835463	turquoise	hypothetical protein VITISV_011743 [Vitis vinifera]		3.09942	3.10112	1.39419	3.50936	2.02424	2.31196	2.97005	2.72287	0.395018	0.712913	1.18086
EVM0015711	0.698868	turquoise	diphosphomevalonate decarboxylase [Morus alba]		107.758	132.095	130.615	84.7736	158.425	225.721	106.171	73.308	42.8035	79.1292	38.3533
EVM0015714	0.701657	turquoise	PREDICTED: lariat debranching enzyme isoform X1 [Vitis vinifera]		14.259	16.6617	16.136	17.6235	11.6796	12.7292	13.0446	13.2966	6.4969	6.55404	9.54617
EVM0015715	0.300848	turquoise	PREDICTED: mitochondrial import receptor subunit TOM9-2-like [Nelumbo nucifera]		103.495	101.376	77.6629	60.2477	60.5181	96.5617	62.2073	56.5415	30.9282	82.8836	54.3544
EVM0012843	0.705024	turquoise	PREDICTED: pentatricopeptide repeat-containing protein At1g63330-like [Nelumbo nucifera]		2.22841	2.99928	2.96646	4.60026	2.03133	2.39728	2.85004	3.24558	0.507238	1.09932	1.37069
EVM0005669	0.692397	turquoise	uncharacterized protein LOC105631161 [Jatropha curcas]		14.7947	20.2482	21.7635	20.1288	16.8024	17.1874	21.9711	27.2586	9.52042	7.06423	7.64807
EVM0007791	0.701968	turquoise	PREDICTED: glycogen phosphorylase 1 isoform X1 [Vitis vinifera]		7.83108	14.0798	9.5511	12.1845	7.6909	5.84358	8.9278	7.97158	2.72696	1.57402	4.08211
EVM0012154	0.505972	turquoise	Heat shock protein 89.1 isoform 2 [Theobroma cacao]		37.2408	35.3476	39.2198	26.9872	32.3392	40.8676	30.383	29.8108	15.314	26.2956	23.9293
EVM0012156	0.925282	turquoise	delta-1-pyrroline-5-carboxylate synthase [Momordica charantia]		62.1223	53.4576	54.4087	61.4099	63.3429	62.947	61.5711	49.5814	12.8401	32.3066	20.5544
EVM0012158	0.936027	turquoise	PREDICTED: nuclear export mediator factor Nemf isoform X1 [Vitis vinifera]		24.3899	23.2705	24.0414	24.5557	22.9233	23.8433	22.8058	21.4679	11.2001	13.3831	11.6074
EVM0017524	0.831193	turquoise	PREDICTED: protein FAR1-RELATED SEQUENCE 2 [Vitis vinifera]		10.0048	10.739	10.7633	12.6112	10.0758	9.79164	8.52542	8.63297	4.3995	5.95454	5.96738
EVM0028886	0.832263	turquoise	DEAD-box ATP-dependent RNA helicase 14-like [Quercus suber]		59.4003	63.2112	69.7197	60.313	82.4097	80.8385	85.0147	88.1209	36.5659	40.8321	42.6821
EVM0028888	0.53202	turquoise	PREDICTED: uncharacterized protein LOC100249317 isoform X1 [Vitis vinifera]		1.97804	1.63153	1.56488	0.621652	1.45884	3.01286	1.15035	0.72197	0.111953	0.316293	0.342262
EVM0027689	0.778193	turquoise	PREDICTED: ubiquitin carboxyl-terminal hydrolase 22-like [Juglans regia]		17.648	21.3841	29.3153	23.9909	19.349	17.4873	13.7104	14.8799	5.30196	10.9248	8.80972
EVM0014872	0.747459	turquoise	hypothetical protein CFP56_45200 [Quercus suber]		16.496	29.154	16.6789	24.9671	13.7035	18.4451	21.9808	11.772	5.49093	8.21005	3.95432
EVM0014878	0.832913	turquoise	PREDICTED: uncharacterized protein LOC100259097 [Vitis vinifera]		27.7965	37.4152	42.7492	35.1056	46.6188	56.768	48.2663	50.0739	12.9733	23.5588	18.0762
EVM0022336	0.810917	turquoise	PREDICTED: L-cysteine desulfhydrase [Vitis vinifera]		19.2098	25.326	23.8786	22.6603	19.4729	19.3252	20.5873	19.6037	7.10495	13.3786	11.2213
EVM0019188	0.671533	turquoise	ARM repeat superfamily protein, putative isoform 3 [Theobroma cacao]		8.16489	9.89584	7.75819	7.9455	8.45821	9.93509	9.71243	11.0272	5.20992	6.74442	7.17839
EVM0019185	0.806959	turquoise	PREDICTED: E3 ubiquitin-protein ligase MIEL1 [Vitis vinifera]		16.1402	13.4002	10.1632	8.4723	11.1309	11.7573	10.4246	8.69065	5.03468	6.03952	4.58643
EVM0022609	0.93257	turquoise	PREDICTED: glucose-induced degradation protein 8 homolog [Vitis vinifera]		20.4614	32.1297	28.4197	26.5653	23.8098	27.9566	25.7527	25.1655	12.2165	14.4604	13.7201
Liquidambar_formosana_newGene_14221	0.689737	turquoise	#N/A		1.58237	3.37392	1.05232	2.38799	1.02977	2.13468	1.78672	1.79895	0.577619	0.146126	0.639458
EVM0020222	0.822673	turquoise	PREDICTED: F-box/LRR-repeat protein 14 [Vitis vinifera]		52.2547	39.1682	41.3636	63.5768	55.6265	43.0827	49.9322	51.0721	25.5307	21.4187	30.5232
EVM0020223	0.791943	turquoise	PREDICTED: histone H2AX [Nelumbo nucifera]		206.819	242.652	255.926	107.501	193.479	237.218	319.581	241.407	26.6631	76.677	65.501
EVM0020229	0.748964	turquoise	PREDICTED: low-temperature-induced cysteine proteinase [Vitis vinifera]		554.734	502.984	523.991	911.053	483.404	530.405	434.302	447.773	188.398	413.371	173.041
EVM0027387	0.708562	turquoise	beta-1,4-mannosyl-glycoprotein 4-beta-N-acetylglucosaminyltransferase-like [Hevea brasiliensis]		8.95706	13.832	11.5271	7.86253	7.73336	10.0218	4.62589	4.57652	1.46085	2.3043	3.09002
EVM0005312	0.647653	turquoise	PREDICTED: pentatricopeptide repeat-containing protein At1g80150, mitochondrial [Vitis vinifera]		1.44841	1.34104	1.73921	0.874571	0.809388	1.26033	1.10771	0.876694	0.174922	0.463865	0.501399
EVM0010827	0.779259	turquoise	PREDICTED: UPF0503 protein At3g09070, chloroplastic [Vitis vinifera]		7.20406	9.03161	12.1759	7.43719	6.7902	10.1377	9.90662	10.0782	1.84338	2.54812	4.62414
EVM0009018	0.981346	turquoise	hypothetical protein POPTR_017G138500v3 [Populus trichocarpa]		43.5814	52.3132	53.97	56.323	53.4476	55.224	51.7379	53.6039	18.1929	24.3362	28.1736
EVM0009010	0.815237	turquoise	PREDICTED: uncharacterized protein LOC109001273 [Juglans regia]		1.66576	4.28482	3.22659	2.63856	4.74276	5.13518	4.30713	4.22386	0.447805	1.13469	2.20358
EVM0009014	0.932255	turquoise	PREDICTED: ATP-dependent DNA helicase DDX11 isoform X1 [Vitis vinifera]		2.47486	4.12047	3.55794	2.70182	3.0117	2.84262	3.41517	2.55418	0.384095	0.942457	1.0918
EVM0009016	0.744687	turquoise	Abhydrolase_1 domain-containing protein [Cephalotus follicularis]		24.0358	44.466	27.5099	21.6049	32.4562	25.0321	32.6874	30.2097	13.2105	11.2674	11.4751
Liquidambar_formosana_newGene_2053	0.627485	turquoise	#N/A		0.646223	3.21733	0.838613	0.938651	2.19971	1.34893	1.70005	1.54508	0.361902	0.038318	0.755102
EVM0006777	0.736265	turquoise	unnamed protein product, partial [Vitis vinifera]		8.73657	17.3092	26.5226	12.6259	15.8864	14.3115	17.3474	20.5903	2.75631	4.93579	4.04491
EVM0018904	0.719963	turquoise	PREDICTED: ultraviolet-B receptor UVR8 [Vitis vinifera]		6.41909	5.55378	4.35926	4.13404	5.08364	6.012	5.13757	4.57923	2.28442	3.31107	3.66746
EVM0018905	0.725478	turquoise	PREDICTED: major allergen Pru ar 1 [Theobroma cacao]		1265.99	693.301	772.267	335.001	500.893	394.727	510.615	622.763	38.2966	224.867	17.8742
EVM0018908	0.718406	turquoise	hypothetical protein POPTR_001G127900v3 [Populus trichocarpa]		0.698201	1.9361	1.73683	3.19134	2.38128	3.71141	1.65095	2.22244	0.555059	0.596191	0.759992
EVM0018909	0.625144	turquoise	PREDICTED: peptidyl-prolyl cis-trans isomerase FKBP20-1 isoform X1 [Nelumbo nucifera]		35.549	78.1867	57.3841	65.8187	61.7324	60.5645	72.9084	66.63	25.9185	65.4075	41.9209
EVM0002105	0.810754	turquoise	PREDICTED: pentatricopeptide repeat-containing protein At5g03800 [Vitis vinifera]		2.95902	3.01783	3.13222	3.51086	2.29397	2.72553	2.51396	2.49968	0.970634	1.68513	1.0933
EVM0016084	0.811044	turquoise	PREDICTED: histidine biosynthesis bifunctional protein hisIE, chloroplastic [Vitis vinifera]		28.5073	33.4454	27.1395	43.3409	28.4943	23.7606	27.8182	33.7115	9.25462	10.8603	15.7634
EVM0003858	0.790371	turquoise	PREDICTED: phosphoribosylaminoimidazole carboxylase, chloroplastic isoform X1 [Vitis vinifera]		17.9399	21.1387	16.581	15.6824	20.114	25.7558	20.3432	19.4974	12.9048	13.3108	12.2349
EVM0003851	0.611923	turquoise	PREDICTED: GRIP and coiled-coil domain-containing protein 2 isoform X2 [Vitis vinifera]		15.8984	16.1138	26.6171	27.3521	21.2961	14.6779	17.1869	18.6253	10.8425	16.0193	12.4648
EVM0007165	0.818388	turquoise	hypothetical protein CISIN_1g036829mg [Citrus sinensis]		0.478553	0.944436	1.0825	1.01312	1.44363	1.26137	1.13891	1.17373	0.548651	0.465861	0.463569
Liquidambar_formosana_newGene_794	0.720971	turquoise	TMV resistance protein N [Quercus suber]		6.04204	6.358	7.71752	9.37276	4.91332	5.50459	6.6601	8.24842	1.73916	3.47567	4.85498
EVM0013108	0.644341	turquoise	hypothetical protein VITISV_026039 [Vitis vinifera]		21.3954	26.6103	23.501	18.0443	25.3148	34.8093	25.7819	24.4826	18.0726	18.039	17.8026
EVM0013105	0.807176	turquoise	PREDICTED: N-alpha-acetyltransferase 40-like [Juglans regia]		7.00009	8.6075	6.8949	6.97696	6.73577	7.61925	7.38739	5.75916	2.09111	4.66616	5.32745
Liquidambar_formosana_newGene_2052	0.802288	turquoise	#N/A		3.43972	5.0808	4.64004	6.345	5.0919	5.12497	5.92309	6.07436	1.16408	3.89022	2.76017
EVM0013813	0.572024	turquoise	PREDICTED: elongator complex protein 4 isoform X2 [Vitis vinifera]		20.2923	22.3137	15.2047	13.1253	18.9165	28.1804	21.9639	22.8925	13.607	13.5506	17.762
EVM0013815	0.637419	turquoise	frigida-like protein 3 [Quercus suber]		2.86076	1.65618	3.0987	2.25682	2.58022	2.89944	3.05317	3.76043	1.24259	1.7141	2.04893
EVM0013818	0.761061	turquoise	PREDICTED: F-box protein At5g03100 [Vitis vinifera]		7.09925	6.58704	6.18713	10.2816	4.58545	5.06421	6.05508	6.60131	1.9583	2.70329	4.07755
EVM0024236	0.615759	turquoise	PREDICTED: putative disease resistance RPP13-like protein 1 [Vitis vinifera]		3.55036	5.15245	5.86209	3.91225	7.03368	7.90389	6.81249	7.26876	2.00844	2.53133	4.70626
EVM0024238	0.901827	turquoise	#N/A		2.5169	2.49589	2.18322	1.9916	2.57604	3.10852	3.05198	1.84416	0.02773	0.620492	0.181058
EVM0019227	0.463396	turquoise	PREDICTED: aspartate, glycine, lysine and serine-rich protein-like [Nelumbo nucifera]		88.3439	107.662	87.9926	65.3141	88.2172	110.808	89.4326	54.1622	26.0846	69.9909	74.2411
EVM0019228	0.636999	turquoise	uncharacterized protein LOC105635879 [Jatropha curcas]		2.39995	4.42113	4.47227	2.80539	4.54629	5.50016	6.06984	5.96714	1.92404	2.41515	1.75172
EVM0021347	0.819789	turquoise	probable RNA-binding protein 18 isoform X1 [Jatropha curcas]		10.1619	14.2313	19.1153	12.4118	20.1869	20.5977	20.2072	20.4884	4.49121	7.58118	6.63053
EVM0023270	0.593764	turquoise	DExH-box ATP-dependent RNA helicase DExH18, mitochondrial [Prunus avium]		11.0481	11.4905	14.4114	10.6724	10.3713	13.4646	10.3309	9.64453	4.88768	7.9139	8.00956
EVM0023271	0.803697	turquoise	disease resistance protein RPP13-like [Quercus suber]		14.6376	17.1388	25.1884	21.5141	22.2736	17.4833	17.2569	17.6011	6.93229	10.8428	7.41699
EVM0023273	0.834088	turquoise	BES1/BZR1 homolog protein 2-like [Hevea brasiliensis]		45.3438	77.9118	45.5862	63.9508	72.6357	65.5494	55.4596	41.0119	21.3624	31.1888	22.3693
Liquidambar_formosana_newGene_14199	0.793678	turquoise	PREDICTED: putative F-box protein At2g02030 [Elaeis guineensis]		1.51747	1.20373	0.968238	1.27296	0.894349	0.970662	1.00595	0.933189	0.254638	0.339765	0.47736
EVM0001100	0.71197	turquoise	PREDICTED: protein argonaute 4-like isoform X2 [Juglans regia]		175.14	216.73	169.509	237.226	186.399	185.247	239.66	200.888	71.4609	91.8964	132.614
Liquidambar_formosana_newGene_7095	0.816564	turquoise	PREDICTED: disease resistance protein RGA2-like [Daucus carota subsp. sativus]		1.30219	1.12857	0.798792	1.40252	0.955449	1.40459	1.45678	1.62609	0.129159	0.669104	0.677828
Liquidambar_formosana_newGene_14226	0.88857	turquoise	hypothetical protein F511_27983 [Dorcoceras hygrometricum]		1.37168	3.16622	2.27717	2.35856	3.34951	3.6547	2.57941	3.37611	0.277642	0.874006	0.880861
EVM0018285	0.703756	turquoise	general transcription factor IIF subunit 2-like [Quercus suber]		2.29515	7.4194	11.0012	10.1922	7.37277	7.49856	6.65648	4.91304	2.4267	1.64134	1.76567
EVM0020737	0.744284	turquoise	PREDICTED: uncharacterized protein LOC100242649 isoform X1 [Vitis vinifera]		4.1939	9.61286	7.44407	6.62658	10.2146	11.3787	8.64524	6.98869	3.405	4.27725	4.39269
EVM0009561	0.799286	turquoise	PREDICTED: UPF0481 protein At3g47200-like isoform X1 [Vitis vinifera]		10.648	9.48746	6.6913	10.1706	6.31161	8.37313	6.72431	6.31367	0.726862	2.21876	2.23277
EVM0019996	0.673872	turquoise	ras-related protein RABA1f-like [Durio zibethinus]		21.9442	28.2733	32.2577	21.1535	20.2201	24.5549	27.016	28.0251	5.99842	17.9125	13.8146
EVM0027012	0.707249	turquoise	PREDICTED: uncharacterized protein LOC100246403 [Vitis vinifera]		9.64658	11.5443	12.5192	8.20879	17.5245	23.282	30.4974	27.9678	1.18675	4.91581	4.5332
EVM0002474	0.842908	turquoise	PREDICTED: signal recognition particle subunit SRP72 [Vitis vinifera]		10.1912	10.8796	10.011	11.1063	8.83013	9.67667	7.61649	7.2453	3.18481	5.57415	5.29221
Liquidambar_formosana_newGene_2305	0.70117	turquoise	COR413-PM2, putative, partial [Ricinus communis]		0.439501	0.845361	1.08365	1.34213	0.688564	0.730157	0.521822	0.753279	0.189002	0.385782	0.348115
EVM0027900	0.783011	turquoise	glutamyl-tRNA(Gln) amidotransferase subunit B, chloroplastic/mitochondrial [Herrania umbratica]		1.35012	2.24422	1.51307	2.16193	1.12347	1.6172	1.54595	1.87357	0.160824	0.238614	0.718927
EVM0019485	0.782863	turquoise	PREDICTED: importin subunit alpha-2 [Vitis vinifera]		81.7832	86.8071	88.2473	78.2245	87.2736	101.087	112.857	112.325	59.1151	65.3639	71.2984
EVM0011258	0.918377	turquoise	PREDICTED: uncharacterized protein LOC100852824 [Vitis vinifera]		10.6344	12.2594	9.55692	13.2667	9.60747	8.93692	10.8075	8.60765	2.83045	5.45449	3.62695
EVM0011257	0.795914	turquoise	ethylene-responsive transcription factor ERF098-like [Prunus avium]		2.1633	4.32598	1.40565	2.56592	3.28418	4.66785	4.16482	3.60694	0.297061	0.663506	0.663387
EVM0005956	0.645296	turquoise	PREDICTED: uncharacterized protein LOC104882625 isoform X4 [Vitis vinifera]		0.123542	9.11709	11.7877	9.00609	8.82954	6.76537	8.32011	7.10083	0.30532	0.436953	0.134903
EVM0009601	0.874721	turquoise	PREDICTED: thioredoxin-like 2, chloroplastic [Daucus carota subsp. sativus]		1.9607	3.35217	2.34507	4.147	3.1388	3.1457	3.24634	2.81679	0.494285	0.616472	1.21683
EVM0029332	0.722417	turquoise	PREDICTED: sugar transporter ERD6-like 6 [Vitis vinifera]		16.083	34.5084	49.1578	35.2735	57.2261	46.0959	47.9803	52.2111	6.70918	30.7987	26.8359
EVM0009602	0.66973	turquoise	PREDICTED: mitochondrial fission 1 protein A [Theobroma cacao]		49.323	69.6955	51.076	57.5263	72.7925	66.8836	62.8725	69.6282	51.402	48.0312	41.269
EVM0023073	0.78161	turquoise	protein ANTHESIS POMOTING FACTOR 1 isoform X2 [Sesamum indicum]		34.3492	34.3379	31.2674	34.7708	22.9414	28.7684	23.7886	25.0422	9.50475	18.9581	15.5965
EVM0011929	0.600105	turquoise	unnamed protein product [Coffea canephora]		12.4642	17.7578	9.17328	13.3611	14.1596	18.6676	15.9662	15.3992	7.48998	16.252	8.04293
Liquidambar_formosana_newGene_11561	0.567895	turquoise	#N/A		1.02594	1.54113	0.945353	1.22723	1.638	1.38656	2.52403	3.08345	0.455872	0.614193	0.605014
EVM0011362	0.802953	turquoise	hypothetical protein AQUCO_00200750v1 [Aquilegia coerulea]		2.64411	7.12712	9.6407	4.65775	6.37358	8.3385	9.64167	8.86246	0.395449	1.48115	2.66607
EVM0011361	0.606314	turquoise	DUF946 domain-containing protein/DUF1162 domain-containing protein/Chorein_N domain-containing protein [Cephalotus follicularis]		19.1896	17.2807	22.0791	31.3977	21.8542	16.9429	18.4203	23.6778	11.7773	14.4188	18.6164
EVM0004602	0.867297	turquoise	PREDICTED: protein argonaute 1 isoform X2 [Citrus sinensis]		124.444	203.299	115.282	167.183	140.179	162.916	162.684	153.849	66.3575	60.9135	98.3333
EVM0004600	0.657125	turquoise	PREDICTED: RNA polymerase II C-terminal domain phosphatase-like 2 isoform X1 [Vitis vinifera]		8.26157	11.5175	16.4465	9.51585	9.62968	11.7756	11.4559	10.7071	4.7664	6.36161	6.735
Liquidambar_formosana_newGene_13164	0.549194	turquoise	PREDICTED: uncharacterized protein LOC104884364 [Beta vulgaris subsp. vulgaris]		2.60281	1.86126	2.77179	3.03933	0.91224	1.25632	1.10065	0.998525	0.214872	0.400987	1.22204
EVM0002738	0.74417	turquoise	PREDICTED: uncharacterized protein LOC100246721 [Vitis vinifera]		6.17117	8.88894	8.17437	5.56379	6.98746	5.99502	6.74566	6.69033	2.23965	3.16012	2.34133
EVM0016320	0.836499	turquoise	PREDICTED: F-box/kelch-repeat protein At3g23880-like isoform X2 [Nicotiana tomentosiformis]		2.30094	2.97281	2.7458	2.72411	2.92192	2.57375	1.79194	2.37946	0.471754	1.02443	0.56879
EVM0017678	0.801964	turquoise	ATP-dependent zinc metalloprotease FTSH 10, mitochondrial-like isoform X1 [Quercus suber]		11.8039	17.8836	16.6922	21.8683	14.1914	14.8323	14.9966	13.2624	5.70271	10.6715	7.48723
EVM0024860	0.934389	turquoise	LOW QUALITY PROTEIN: DEAD-box ATP-dependent RNA helicase 42-like, partial [Carica papaya]		29.7746	26.3002	24.485	31.8773	27.9895	27.9665	28.0919	27.1309	10.5896	14.504	16.4831
Liquidambar_formosana_newGene_5011	0.78146	turquoise	#N/A		1.19981	2.96674	2.20555	2.72941	3.94392	2.99695	4.22465	3.73973	0.809633	0.882815	1.11001
EVM0017493	0.646893	turquoise	PREDICTED: uncharacterized protein LOC100248230 [Vitis vinifera]		103.992	134.628	221.46	154.817	157.543	157.113	127.119	124.597	43.3413	100.563	79.7024
EVM0010642	0.643785	turquoise	PREDICTED: pentatricopeptide repeat-containing protein At4g01990, mitochondrial [Vitis vinifera]		10.2826	11.7272	7.9445	5.77591	8.13982	15.0154	11.9533	9.37881	3.69589	4.62146	6.0913
EVM0010644	0.688904	turquoise	PREDICTED: agamous-like MADS-box protein AGL65 [Vitis vinifera]		2.10036	2.05407	2.90465	4.19768	2.59432	2.3852	4.39371	4.24686	1.15196	1.31598	0.614163
EVM0017145	0.851652	turquoise	PREDICTED: putative E3 ubiquitin-protein ligase UBR7 [Vitis vinifera]		33.436	34.5105	31.5332	22.4898	32.4641	38.0995	31.1116	29.7745	6.76783	13.3757	17.7699
EVM0023848	0.412471	turquoise	PREDICTED: probable LIM domain-containing serine/threonine-protein kinase DDB_G0286997 [Gossypium hirsutum]		0.221541	1.74136	1.22916	7.22601	4.08891	2.78104	6.10644	6.13943	0.072826	4.34505	1.5456
EVM0023841	0.670496	turquoise	PREDICTED: uncharacterized protein LOC105963385 [Erythranthe guttata]		28.5827	29.6763	36.3551	16.4113	22.5751	32.717	30.9504	30.7358	9.5482	15.1103	10.0556
EVM0018343	0.864079	turquoise	hypothetical protein AQUCO_00900498v1 [Aquilegia coerulea]		51.9369	54.6476	54.6964	46.5635	57.0294	65.0307	61.0587	61.426	27.0543	29.2289	31.4543
EVM0018349	0.784332	turquoise	E3 ubiquitin-protein ligase ORTHRUS 2-like [Hevea brasiliensis]		33.3907	44.0982	26.3563	22.7475	27.7839	25.4372	19.2443	12.2198	0.54013	11.249	5.40304
EVM0028443	0.84585	turquoise	PREDICTED: transcription initiation factor IIB [Juglans regia]		0.891574	18.2273	11.6614	10.6034	13.7143	14.9984	17.1367	13.3352	0.332898	0.365763	2.52233
EVM0022712	0.765689	turquoise	PREDICTED: oxysterol-binding protein-related protein 1C-like isoform X2 [Ziziphus jujuba]		25.397	38.6544	42.2642	38.1027	57.4788	46.8412	45.5249	41.1997	20.2485	22.7855	15.5019
EVM0024003	0.795571	turquoise	pentatricopeptide repeat-containing protein At4g11690 [Quercus suber]		5.39654	5.63341	4.36301	6.02858	3.23026	4.51462	3.6277	3.22793	0.959993	1.65944	1.8858
EVM0024009	0.759371	turquoise	protein BUD31 homolog 2-like [Durio zibethinus]		69.0964	66.2624	48.6571	51.8838	61.8835	65.5028	63.6899	59.0293	32.0558	49.5656	40.2588
Liquidambar_formosana_newGene_7662	0.765463	turquoise	hypothetical protein PRUPE_4G127700 [Prunus persica]		2.68367	4.8984	2.91373	6.00219	3.57987	3.76251	3.68692	4.24779	0.544191	1.0387	2.4049
Liquidambar_formosana_newGene_7663	0.637695	turquoise	#N/A		0.057373	0.426588	0.276613	1.23359	0.340547	0.351407	0.512734	0.767558	0.00278867	0.003513	0.00526933
Liquidambar_formosana_newGene_7669	0.82192	turquoise	unnamed protein product, partial [Vitis vinifera]		23.1555	20.4589	14.798	25.2119	15.7513	15.5876	17.5451	20.1572	3.33303	4.92973	8.05903
EVM0001712	0.78834	turquoise	PREDICTED: protein FAR1-RELATED SEQUENCE 5 [Vitis vinifera]		6.26247	6.62656	4.90359	8.15869	5.19254	5.00256	5.74452	6.17627	1.04052	2.41258	3.60845
EVM0003667	0.919827	turquoise	unnamed protein product, partial [Vitis vinifera]		11.9282	16.6539	11.0629	12.9248	14.0138	15.6196	13.9856	12.1007	3.91709	6.67933	6.51024
EVM0008397	0.723107	turquoise	PREDICTED: pentatricopeptide repeat-containing protein At5g39980, chloroplastic [Juglans regia]		11.6747	11.4428	11.1877	14.1425	9.56413	9.08209	8.13117	9.49276	5.37836	6.53796	5.60619
EVM0015636	0.835516	turquoise	PREDICTED: nucleolin [Vitis vinifera]		36.9053	54.6208	30.9459	43.6172	44.3298	55.6024	55.8479	57.0093	22.2869	23.6018	28.6655
EVM0002532	0.501904	turquoise	pectinesterase 2-like [Manihot esculenta]		0.634678	0.768397	1.05933	0.305179	1.3304	1.76984	1.66229	2.26956	0.253777	0.31207	0.403824
EVM0003644	0.801316	turquoise	hypothetical protein GLYMA_15G073000 [Glycine max]		4.54444	6.69539	7.92683	6.31405	13.9989	11.7585	10.7386	9.06482	3.05528	3.6653	3.50823
EVM0005629	0.793075	turquoise	PREDICTED: uncharacterized protein LOC108980324 isoform X1 [Juglans regia]		11.8625	12.667	18.6363	12.8762	19.8145	20.3364	16.6443	16.272	6.04602	7.49356	6.4984
EVM0004973	0.666849	turquoise	PREDICTED: protein PHLOEM PROTEIN 2-LIKE A10-like [Ziziphus jujuba]		3.9158	7.27385	5.1466	8.65754	6.40401	7.20205	8.53013	8.49605	5.62313	3.71053	3.37076
EVM0006190	0.847374	turquoise	trans-resveratrol di-O-methyltransferase-like isoform X4 [Quercus suber]		132.289	357.89	266.236	219.668	264.729	306.987	254.873	242.061	105.18	40.9816	44.637
EVM0006191	0.850725	turquoise	PREDICTED: uncharacterized protein LOC100246156 isoform X2 [Vitis vinifera]		6.86964	8.45194	10.4915	10.9848	8.70196	9.94578	11.5295	9.78083	4.01651	4.83878	5.07084
Liquidambar_formosana_newGene_366	0.916387	turquoise	Mitogen-activated protein kinase kinase kinase [Parasponia andersonii]		10.6842	16.1047	16.9664	16.069	16.9962	20.0636	15.3428	19.2374	3.19852	5.42795	9.03691
Liquidambar_formosana_newGene_364	0.767028	turquoise	#N/A		0.59591	0.643772	0.627954	1.17558	0.643378	0.634719	1.06545	1.22715	0.233575	0.230802	0.423455
EVM0005082	0.82188	turquoise	#N/A		12.0308	25.8043	14.3078	19.1419	14.4552	19.0999	13.974	12.8239	3.66271	3.85437	6.96232
EVM0017303	0.707233	turquoise	PREDICTED: TATA-binding protein-associated factor BTAF1 isoform X2 [Vitis vinifera]		16.0853	22.2463	18.2717	20.4388	30.9631	26.5671	27.0264	30.09	15.3006	12.4456	14.6843
EVM0017307	0.868245	turquoise	PREDICTED: protein FAR1-RELATED SEQUENCE 5 [Ziziphus jujuba]		20.6096	22.3105	20.6301	24.2524	16.2859	19.4231	23.4989	22.3666	11.7405	10.8992	11.2978
Liquidambar_formosana_newGene_942	0.888153	turquoise	serine carboxypeptidase-like 29 isoform X2 [Arachis duranensis]		6.31017	11.651	10.0038	9.59114	11.794	14.664	15.028	13.853	2.43794	3.37768	5.89664
EVM0000900	0.918194	turquoise	PREDICTED: SH3 domain-containing protein 2-like [Juglans regia]		35.1844	46.5281	37.0792	50.1162	40.4434	44.0293	45.2341	47.9116	17.4967	30.3727	26.8202
Liquidambar_formosana_newGene_13453	0.768902	turquoise	#N/A		9.7492	11.2657	4.9935	7.33727	6.9465	9.98372	7.75201	9.28588	2.01943	3.55747	6.31701
EVM0026261	0.720689	turquoise	PREDICTED: U3 small nucleolar RNA-associated protein 14 homolog A [Vitis vinifera]		30.1564	40.9723	31.845	26.2819	55.0061	67.1408	58.9529	51.9608	15.2575	18.9416	19.1747
EVM0021609	0.641211	turquoise	uncharacterized protein CFP56_34204 [Quercus suber]		1.01167	1.60802	1.40984	3.07795	0.760333	0.894009	1.00282	1.26019	0.380301	0.336661	0.347672
EVM0010333	0.525634	turquoise	LOW QUALITY PROTEIN: cystathionine gamma-synthase 1, chloroplastic-like [Sesamum indicum]		123.592	144.143	176.016	129.844	251.593	242.647	255.729	261.713	115.323	174.344	107.648
EVM0015216	0.878145	turquoise	uncharacterized protein LOC110772759 [Prunus avium]		0.522781	1.76494	1.32998	1.35775	1.38453	2.02562	2.18009	2.27848	0.013813	0.0527153	0.286619
EVM0015215	0.639162	turquoise	integrator complex subunit 9-like [Quercus suber]		5.49183	9.67545	7.30493	8.38818	6.07628	8.59023	6.9912	7.10232	3.28618	4.43078	6.47435
EVM0024649	0.762611	turquoise	SWR1 complex subunit 6 [Arachis ipaensis]		11.0746	11.8312	6.23927	9.32682	11.3506	12.7161	14.6771	15.7831	4.01643	4.91082	7.4502
EVM0020551	0.842273	turquoise	LOW QUALITY PROTEIN: uncharacterized protein LOC107643595 [Arachis ipaensis]		51.4315	52.5186	58.2479	61.3896	57.9147	61.9953	44.8599	40.6211	27.5235	33.1413	27.8817
EVM0008146	0.876668	turquoise	PREDICTED: serine/threonine-protein kinase GRIK2 isoform X1 [Vitis vinifera]		66.8204	77.2625	103.141	90.4352	93.8506	98.1598	83.5696	82.2801	33.7742	55.0467	62.1222
Liquidambar_formosana_newGene_13840	0.59963	turquoise	PREDICTED: protein FAR1-RELATED SEQUENCE 5-like [Prunus mume]		2.11931	1.50759	1.60132	2.32339	1.47114	1.09456	1.488	1.83131	0.402832	0.63439	0.991479
EVM0006080	0.747948	turquoise	cytochrome P450 714C2-like [Quercus suber]		32.0205	22.7199	14.0913	28.3185	37.5637	35.8369	43.1536	35.8653	10.663	14.874	8.86534
Liquidambar_formosana_newGene_4573	0.6853	turquoise	PREDICTED: protein TPX2 isoform X2 [Vitis vinifera]		2.0849	2.47656	1.75124	5.08333	2.01589	3.54948	3.46855	2.83339	0.211391	0.600386	0.822397
EVM0022175	0.529194	turquoise	PREDICTED: lysM domain receptor-like kinase 3 [Vitis vinifera]		2.96801	10.1968	12.8095	8.68648	22.7026	19.7864	12.4795	13.9617	4.97219	3.71672	9.03076
EVM0016172	0.647171	turquoise	PREDICTED: homeobox-leucine zipper protein ANTHOCYANINLESS 2 isoform X2 [Vitis vinifera]		16.4091	113.467	36.7886	97.7803	40.7274	60.5742	51.2523	45.0142	22.2996	2.24634	12.5642
EVM0016171	0.447607	turquoise	PREDICTED: uncharacterized protein LOC100853641 [Vitis vinifera]		17.054	23.3522	23.4578	12.331	16.5159	24.2299	20.6464	17.6739	8.35364	15.7475	16.9193
EVM0013526	0.626965	turquoise	protein HEAT INTOLERANT 4-like [Quercus suber]		27.8166	50.4936	62.1927	40.1962	64.6485	65.5557	61.6514	59.1704	35.6504	28.1748	35.8834
EVM0009937	0.770331	turquoise	probable cytokinin riboside 5&apos;-monophosphate phosphoribohydrolase LOGL10 [Prunus avium]		2.32483	3.4678	4.0516	3.42024	3.60936	2.53664	2.73806	2.51198	0.915486	1.64563	1.29071
EVM0009935	0.536866	turquoise	PREDICTED: pentatricopeptide repeat-containing protein At3g29230 [Vitis vinifera]		0.893487	1.00893	1.0308	0.843553	0.777559	1.08703	0.440273	0.618062	0.356488	0.573466	0.47133
EVM0007840	0.888692	turquoise	PREDICTED: RING-H2 finger protein ATL47-like isoform X1 [Juglans regia]		23.1824	14.8785	17.6463	19.4813	23.5456	20.4873	22.8422	19.6229	3.88135	7.70085	9.31429
EVM0007930	0.814257	turquoise	UDP-glycosyltransferase 74AG1 [Camellia sinensis]		2.50615	3.05594	4.75352	5.241	5.58805	5.3412	5.57047	4.22005	1.38456	1.33692	1.94912
Liquidambar_formosana_newGene_6700	0.83227	turquoise	#N/A		0.586018	1.60247	1.06857	1.16988	0.790775	1.14351	0.647916	0.680803	0.0199113	0.120807	0.244009
Liquidambar_formosana_newGene_3954	0.875537	turquoise	#N/A		5.58762	6.21299	6.12004	7.81599	5.87514	5.96049	9.14738	9.47865	1.25646	2.90383	3.09571
Liquidambar_formosana_newGene_6709	0.722517	turquoise	#N/A		0.910844	2.60781	1.11592	3.5878	2.92949	2.43999	3.05779	3.81806	0.574324	0.384953	1.394
EVM0001692	0.863175	turquoise	PREDICTED: N6-adenosine-methyltransferase MT-A70-like [Vitis vinifera]		48.9939	46.8774	27.7607	37.7885	36.8672	42.2238	39.209	38.7993	16.4702	20.1606	22.3788
EVM0009098	0.588131	turquoise	unknown [Populus trichocarpa x Populus deltoides]		0.196266	22.4122	8.81858	29.13	12.1752	15.0501	19.6126	27.3506	8.53933	0.117616	2.84714
EVM0014322	0.638197	turquoise	uncharacterized protein At2g29880-like [Prunus avium]		0.137883	0.650368	1.10307	1.28342	2.17975	1.44133	2.77856	1.13447	0.179112	0.285069	0.683885
EVM0004343	0.770405	turquoise	acyl-CoA-binding domain-containing protein 5-like [Quercus suber]		6.6504	35.3211	7.08502	27.3902	22.1306	26.5741	27.8716	21.0968	0.0751057	0.875963	5.01898
EVM0004347	0.836557	turquoise	PREDICTED: uncharacterized protein LOC100257644 isoform X1 [Vitis vinifera]		5.7088	8.96926	9.92744	9.91269	7.85959	8.26482	6.36207	8.17692	2.53701	3.05757	5.26391
EVM0003580	0.894813	turquoise	PREDICTED: vacuolar fusion protein CCZ1 homolog isoform X4 [Vitis vinifera]		28.8657	38.9436	27.8761	33.2206	35.2383	37.3669	31.5081	31.299	14.454	24.5318	19.4761
EVM0003582	0.855275	turquoise	casein kinase 1-like protein 3 isoform X1 [Durio zibethinus]		16.8116	17.291	17.875	16.9912	16.5537	17.8846	17.51	20.238	8.44949	14.8231	12.7861
EVM0007692	0.840145	turquoise	PREDICTED: uncharacterized protein LOC100251356 [Vitis vinifera]		31.6938	49.5572	68.4604	57.6396	74.1421	78.97	81.7568	74.4293	19.0081	23.3959	17.6639
EVM0007696	0.605607	turquoise	myb-related protein 306-like [Quercus suber]		2.92996	36.2736	56.1566	56.5368	47.7503	28.6155	34.3954	24.2761	6.10755	0.0261813	4.77296
EVM0015582	0.601815	turquoise	FRIGIDA-like protein isoform 1 [Theobroma cacao]		552.149	365	374.225	441.57	515.837	462.469	591.642	635.403	346.319	224.885	394.521
EVM0012051	0.866863	turquoise	PREDICTED: probable methyltransferase PMT2 [Juglans regia]		26.7552	31.0105	20.0044	27.4562	34.1698	38.3435	34.6864	33.4963	0.205223	12.2213	2.35591
EVM0012053	0.871236	turquoise	unnamed protein product, partial [Vitis vinifera]		145.965	140.397	98.1904	146.24	98.089	116.311	119.736	125.952	36.9486	77.6703	65.6938
EVM0002181	0.501908	turquoise	unnamed protein product, partial [Vitis vinifera]		143.458	135.417	291.007	160.567	266.572	284.77	309.103	263.588	165.621	79.7242	151.395
EVM0016773	0.912725	turquoise	DUF1296 domain-containing protein [Cephalotus follicularis]		28.0289	24.8528	24.201	25.8689	25.5143	27.0651	24.8925	24.4919	9.84862	16.2739	13.568
EVM0016774	0.774585	turquoise	PREDICTED: coiled-coil domain-containing protein 97 [Vitis vinifera]		33.3119	28.8706	35.3713	29.5175	36.8698	36.1609	43.6159	41.4918	20.4046	26.1682	25.9334
EVM0013721	0.797215	turquoise	BTB/POZ domain-containing protein At1g04390 isoform X1 [Hevea brasiliensis]		11.2869	14.4549	18.8313	17.0188	19.8846	20.139	21.4228	19.4986	6.88418	7.82277	11.093
EVM0020841	0.762209	turquoise	PREDICTED: F-box/kelch-repeat protein At1g67480 [Vitis vinifera]		119.3	65.4948	54.8833	79.1638	82.4031	85.9062	74.2773	76.5655	21.3882	50.438	31.8008
EVM0022568	0.772573	turquoise	PREDICTED: pescadillo homolog isoform X1 [Vitis vinifera]		76.6184	86.317	58.3926	53.7303	90.8771	116.105	86.8475	78.9192	31.6188	48.7918	38.9443
EVM0014042	0.769283	turquoise	PREDICTED: protein N-lysine methyltransferase METTL21A isoform X1 [Vitis vinifera]		24.092	32.9467	10.9207	27.7239	27.1064	32.0613	29.7076	32.9249	10.3486	10.7877	15.8356
EVM0025725	0.886868	turquoise	PREDICTED: kinesin-like protein KIN-7C, mitochondrial isoform X1 [Vitis vinifera]		18.543	14.9438	19.2281	20.0882	17.8323	19.5919	15.4684	17.0032	5.15617	12.0352	10.2315
EVM0025720	0.653222	turquoise	AP2/ERF domain-containing transcription factor, partial [Vernicia montana]		3.99256	7.95101	13.6424	7.90172	24.4904	20.3489	24.1873	14.0894	0.0598387	3.60717	2.11752
EVM0021034	0.659877	turquoise	hypothetical protein JCGZ_18768 [Jatropha curcas]		2.71375	2.36231	3.58153	2.2255	2.99106	2.22235	3.2136	2.85528	1.00978	2.08444	2.22914
Liquidambar_formosana_newGene_11090	0.777801	turquoise	#N/A		5.89759	9.49441	9.63359	5.25101	6.70999	9.47775	6.782	8.25571	1.69861	2.80964	2.50625
Liquidambar_formosana_newGene_14114	0.622487	turquoise	uncharacterized protein At2g29880-like [Prunus avium]		3.26937	3.15339	5.33978	9.41748	2.3651	3.55207	2.80142	3.06234	0.861677	0.868446	0.768616
EVM0020071	0.591859	turquoise	PREDICTED: diphthamide biosynthesis protein 2 isoform X1 [Vitis vinifera]		3.6209	4.28367	3.98303	2.95697	3.69568	3.84702	2.96647	2.51215	1.54223	2.1848	1.70831
EVM0029151	0.726881	turquoise	cyclic nucleotide-gated ion channel 18 [Morus notabilis]		1.35293	2.21487	2.9161	2.05473	1.68075	0.999911	1.12493	1.73101	0.256892	0.479568	0.527336
EVM0023188	0.623125	turquoise	PREDICTED: probable glutamate carboxypeptidase 2 [Vitis vinifera]		2.78165	18.8773	14.0243	12.9648	24.5491	29.4571	29.4106	23.7532	4.50603	7.00643	14.2485
EVM0023186	0.685027	turquoise	stearoyl-acyl-carrier protein desaturase [Macadamia tetraphylla]		43.4993	52.3682	58.5273	39.003	45.7038	44.3354	53.352	46.9749	14.7875	28.5591	32.3047
EVM0023185	0.857829	turquoise	uncharacterized protein LOC110666082 isoform X2 [Hevea brasiliensis]		6.19066	14.9692	5.55775	13.3707	9.42093	9.27896	11.6288	14.0332	1.22103	1.38423	2.77279
EVM0000638	0.779658	turquoise	flowering-related B-class MADS-box protein [Vitis vinifera]		0.121043	21.9669	14.2465	13.8689	21.5722	24.5999	31.8302	15.532	1.78517	0.0406037	0.581713
EVM0021850	0.755991	turquoise	PREDICTED: TMV resistance protein N-like [Nelumbo nucifera]		1.98093	1.57004	2.53268	2.56776	1.22033	1.44216	1.44516	1.72206	0.331042	0.869191	0.916954
Liquidambar_formosana_newGene_5383	0.501857	turquoise	hypothetical protein MANES_17G098900 [Manihot esculenta]		0.0554017	0.397689	0.84652	0.308611	1.79965	1.1773	1.23682	1.72476	0.335761	0.119968	0.055539
EVM0028630	0.809241	turquoise	probable 18S rRNA (guanine-N(7))-methyltransferase isoform X1 [Herrania umbratica]		30.4925	33.6182	21.7653	20.1677	24.5435	33.9098	30.0102	27.3891	10.1612	17.5968	17.3436
EVM0001383	0.844363	turquoise	PREDICTED: uncharacterized protein LOC109013107 isoform X1 [Juglans regia]		12.2373	13.4945	13.5953	14.0852	12.58	14.1843	11.8224	13.9503	4.55079	7.86829	10.129
Liquidambar_formosana_newGene_6121	0.607259	turquoise	disease resistance protein RPM1-like [Quercus suber]		2.96882	3.09408	3.39501	3.76663	2.09891	3.70727	2.9231	3.43576	0.816463	1.03659	2.76239
EVM0024867	0.653821	turquoise	PREDICTED: putative disease resistance RPP13-like protein 1 [Vitis vinifera]		3.72785	4.85716	5.96891	5.0778	5.72852	5.49548	6.37859	7.10762	3.30336	3.01351	4.85366
EVM0001229	0.94539	turquoise	PREDICTED: transcription factor IIIA [Vitis vinifera]		38.5033	50.898	51.7118	42.7742	51.4612	62.3286	50.7448	49.0955	11.678	18.3765	18.6824
EVM0014285	0.757597	turquoise	CTL-like protein DDB_G0288717 [Hevea brasiliensis]		33.8445	30.6001	38.8755	39.1479	41.2164	38.458	49.3696	43.2668	8.86978	26.6146	17.7674
EVM0014283	0.911375	turquoise	PREDICTED: putative nuclease HARBI1 [Vitis vinifera]		23.6866	25.9148	23.9952	20.6525	25.6051	34.6816	25.435	22.379	10.1505	10.0603	11.6283
EVM0014282	0.802179	turquoise	PREDICTED: TMV resistance protein N [Vitis vinifera]		2.64281	2.13495	2.48488	3.42973	2.18249	2.07207	2.11073	2.87103	0.933316	1.58759	1.31652
EVM0014364	0.558773	turquoise	RecName: Full=Basic endochitinase; Flags: Precursor		581.614	57.7384	40.6493	47.5187	255.387	376.998	238.983	196.425	8.36985	78.7019	16.6002
EVM0015626	0.889404	turquoise	PREDICTED: glycerol-3-phosphate acyltransferase 3 [Nicotiana tomentosiformis]		34.25	44.9518	49.5612	49.5236	43.2688	48.161	54.2603	59.687	24.8503	32.1607	28.7855
EVM0012931	0.73694	turquoise	PREDICTED: transcription factor bHLH113 isoform X2 [Ziziphus jujuba]		2.93904	45.8371	23.5257	27.0823	22.912	22.2692	32.1368	28.7435	0.120231	0.72253	5.49697
EVM0003173	0.823185	turquoise	ABI3, putative isoform 4 [Theobroma cacao]		0.246205	55.9216	37.15	43.8058	70.229	57.0827	82.6183	72.4629	0	0	0.00445167
EVM0002225	0.826544	turquoise	clathrin heavy chain 1 [Zea mays]		7.1976	13.4331	11.5374	12.3007	18.3228	15.0921	18.4288	15.3317	2.76743	5.47117	5.52358
EVM0002229	0.808982	turquoise	PREDICTED: uncharacterized protein LOC100256690 [Vitis vinifera]		11.6814	18.2532	11.0718	13.0933	12.2718	16.3021	14.3111	13.5114	8.35803	6.97111	8.50945
EVM0004687	0.866491	turquoise	PREDICTED: uncharacterized protein LOC100854295 isoform X1 [Vitis vinifera]		8.35225	11.6514	12.9059	12.2244	11.8494	11.0994	10.6392	10.302	5.47607	4.80724	6.53899
EVM0004685	0.679203	turquoise	Phosphoribosyltransferase domain [Macleaya cordata]		33.4125	37.7085	28.9782	23.0535	57.2176	67.0869	56.5315	59.0494	9.64124	19.456	13.4137
EVM0003798	0.714963	turquoise	Oligopeptide transporter 3 [Capsicum chinense]		14.2271	19.1292	10.5289	25.928	18.297	32.6162	24.4879	34.3784	2.01287	6.73295	11.5264
EVM0003791	0.678196	turquoise	PREDICTED: E3 ubiquitin protein ligase DRIP2 [Vitis vinifera]		41.8644	53.9388	56.1383	51.8146	62.6011	66.09	83.6828	85.7055	32.9378	33.403	35.5286
EVM0007081	0.718131	turquoise	PREDICTED: uncharacterized protein LOC104599217 [Nelumbo nucifera]		0.399938	2.48473	2.57441	1.69961	1.78109	1.71337	1.31203	0.83728	0.337671	0.199418	0.379876
EVM0019842	0.783936	turquoise	PREDICTED: protein SMG9 isoform X2 [Vitis vinifera]		6.1546	10.695	8.52969	6.34532	10.3651	13.3638	10.3827	8.29638	4.10959	5.4232	4.66384
EVM0005792	0.472758	turquoise	Oligopeptide transporter 3 [Capsicum chinense]		0.893867	0.883106	0.353334	1.23602	1.84275	3.66348	1.23851	1.50972	0.959648	0.36278	0.550658
EVM0007337	0.756633	turquoise	PREDICTED: UDP-glycosyltransferase 76F1 isoform X2 [Vitis vinifera]		0.920837	8.50041	11.2581	8.1508	16.0594	15.2729	16.3344	10.7914	0.0502147	0.878957	1.60795
EVM0005242	0.76503	turquoise	WD-40 repeat-containing protein MSI1 [Sesamum indicum]		57.7314	65.4999	43.3226	53.1468	53.3577	59.0625	55.9908	51.2888	31.8642	45.7267	38.6865
EVM0013913	0.797346	turquoise	PREDICTED: uncharacterized protein LOC100853506 [Vitis vinifera]		16.3785	19.4423	22.3291	29.7109	17.7869	17.3745	18.0625	17.9919	5.90922	12.4246	8.36871
EVM0018034	0.736504	turquoise	PREDICTED: mitochondrial substrate carrier family protein ucpB isoform X1 [Juglans regia]		4.27969	5.7926	6.50197	5.63286	4.49198	4.60984	2.77754	2.59181	0.895509	1.87175	1.04788
EVM0020651	0.849308	turquoise	PREDICTED: protein DEK-like [Ziziphus jujuba]		40.7456	45.3953	31.9041	36.7549	40.2758	52.5592	47.253	48.5186	15.9724	21.7333	25.2512
EVM0022244	0.830978	turquoise	PREDICTED: protein SRG1-like [Juglans regia]		86.6069	117.735	69.4518	89.1556	126.269	116.965	124.509	100.912	32.2993	62.5298	25.6582
Liquidambar_formosana_newGene_13561	0.778611	turquoise	Cell division control 2 A [Gossypium arboreum]		3.39045	3.85011	3.57553	3.55673	3.87837	4.94406	4.25739	5.53823	1.9688	2.41254	3.39469
EVM0024374	0.61408	turquoise	PREDICTED: uncharacterized protein LOC100250176 [Vitis vinifera]		9.16482	10.153	16.573	13.1557	12.375	11.2804	11.8621	10.9495	5.14667	8.1363	6.98223
EVM0022791	0.773444	turquoise	PREDICTED: LMBR1 domain-containing protein 2 homolog A isoform X1 [Vitis vinifera]		21.6615	16.8083	26.7078	22.017	23.0313	19.5144	15.3164	14.4554	7.48944	10.7997	10.3186
EVM0011516	0.925788	turquoise	#N/A		34.6402	43.2627	39.0256	36.7229	38.383	40.8757	40.7344	58.6022	11.5439	18.1935	18.0818
EVM0025979	0.929833	turquoise	rna pseudouridine synthase 3, mitochondrial [Quercus suber]		11.5899	18.8753	15.0954	17.6577	17.6405	18.3934	16.5954	17.9282	5.42807	4.9713	6.55761
Liquidambar_formosana_newGene_6242	0.811081	turquoise	putative pentatricopeptide repeat-containing protein At1g12700, mitochondrial [Quercus suber]		3.07024	3.16073	4.22138	3.80674	2.46686	3.47309	3.24962	5.17401	0.828047	2.05946	2.0452
Liquidambar_formosana_newGene_6241	0.903724	turquoise	LOW QUALITY PROTEIN: protein Rf1, mitochondrial-like [Quercus suber]		1.19986	1.67942	1.69801	1.96721	1.41315	1.63136	1.69499	1.73172	0.402911	0.569966	0.719159
EVM0001023	0.782791	turquoise	unnamed protein product [Coffea canephora]		10.2529	16.8435	11.4717	10.8877	12.2642	13.9926	13.1217	13.3207	7.01629	8.17393	7.49587
Liquidambar_formosana_newGene_809	0.851411	turquoise	hypothetical protein VITISV_026051 [Vitis vinifera]		1.2578	2.05913	1.7198	2.41462	1.37648	1.8886	1.56572	1.81436	0.536848	0.583121	0.631237
EVM0020137	0.712584	turquoise	PREDICTED: DExH-box ATP-dependent RNA helicase DExH12 [Vitis vinifera]		38.3803	29.1512	36.8332	39.3097	29.1099	26.7985	28.1096	30.6481	14.1348	15.7328	15.1896
EVM0001795	0.82324	turquoise	PREDICTED: serine/arginine-rich splicing factor SR45a [Populus euphratica]		114.337	124.331	85.6713	104.077	92.3166	111.911	104.276	115.668	58.2448	70.676	71.4596
EVM0001791	0.678319	turquoise	Ribosomal protein S4/S9 [Macleaya cordata]		3.35946	4.4793	5.88844	4.63933	4.42832	4.17987	3.36629	4.69991	2.17328	2.89555	3.29525
EVM0003392	0.809463	turquoise	K(+) efflux antiporter 5 isoform X2 [Hevea brasiliensis]		8.02269	11.086	11.3723	11.9499	12.1172	13.5522	13.3338	13.9386	4.17607	5.88343	8.66649
Liquidambar_formosana_newGene_802	0.626724	turquoise	#N/A		1.95691	6.57477	3.50242	4.62906	2.3985	2.61407	3.14239	5.09548	0	0.361992	1.46299
Liquidambar_formosana_newGene_4086	0.860386	turquoise	unnamed protein product, partial [Vitis vinifera]		7.51168	9.94636	7.29438	12.2657	8.62666	9.25718	8.0343	9.66507	1.99733	2.84193	4.32945
Liquidambar_formosana_newGene_8347	0.637961	turquoise	PREDICTED: pentatricopeptide repeat-containing protein At1g11290, chloroplastic isoform X1 [Ziziphus jujuba]		0.0665167	0.845547	1.42875	0.899491	1.51758	1.16635	2.81191	3.087	0.180833	0.222986	0.178171
Liquidambar_formosana_newGene_8342	0.90223	turquoise	PREDICTED: transportin-1-like [Juglans regia]		8.52799	11.7314	6.66707	11.2894	7.91366	9.94271	8.89403	11.4262	1.62794	1.99151	3.50087
EVM0026156	0.501391	turquoise	Amino acid/polyamine transporter [Trema orientalis]		2.97037	3.536	3.93545	1.60104	4.46167	6.86038	2.91283	2.29053	0.15978	0.239189	3.5432
EVM0022711	0.700234	turquoise	two-pore potassium channel 3-like [Herrania umbratica]		8.61839	4.93752	4.40363	8.15687	4.92309	4.91982	5.7252	5.29836	1.12881	2.19413	2.37235
EVM0002855	0.680842	turquoise	PREDICTED: protein BONZAI 3 isoform X2 [Vitis vinifera]		1.22698	1.57594	2.09667	1.34792	1.64073	1.47924	1.20489	1.32277	0.26244	0.44065	0.76591
EVM0002859	0.832164	turquoise	5-formyltetrahydrofolate cyclo-ligase, mitochondrial [Quercus suber]		1.53719	1.61611	0.611392	1.28924	0.862001	1.34725	1.04715	1.27657	0.155666	0.0930067	0.330307
Liquidambar_formosana_newGene_12762	0.537988	turquoise	#N/A		0.741475	0.986231	0.658708	1.01015	1.49884	1.207	1.08825	1.24516	0.92613	0.333798	0.389866
EVM0010916	0.703333	turquoise	RING finger and transmembrane domain-containing protein 1-like [Prunus avium]		75.977	80.8902	68.3051	74.2344	80.4447	82.3829	103.764	94.2026	51.9843	59.9039	63.9695
EVM0011065	0.869955	turquoise	mitogen-activated protein kinase kinase 3 isoform X1 [Jatropha curcas]		17.957	18.8821	13.6478	21.6079	18.2657	21.2658	18.3659	18.5562	8.80916	10.6083	9.22148
EVM0023337	0.781845	turquoise	PREDICTED: uncharacterized protein LOC104880236 [Vitis vinifera]		36.3927	26.0697	27.6672	23.1666	21.7467	29.3027	26.5866	24.7472	11.0716	15.9222	17.4262
Liquidambar_formosana_newGene_11444	0.912088	turquoise	#N/A		0.270148	0.554822	0.399827	0.58783	0.633504	0.610241	0.50238	0.487043	0.0782997	0.130474	0.129927
EVM0008493	0.375127	turquoise	PREDICTED: transcription factor PIF3 isoform X1 [Vitis vinifera]		7.56146	14.7576	9.66295	12.2638	14.7857	20.3568	14.2654	14.9044	8.68584	2.50221	20.1045
EVM0016246	0.901406	turquoise	hypothetical protein VITISV_044171 [Vitis vinifera]		66.5131	79.9296	58.0782	75.9533	69.5642	79.6033	53.9243	50.9339	26.1244	44.0331	32.6946
Liquidambar_formosana_newGene_14677	0.84762	turquoise	#N/A		31.1148	48.6578	49.3083	48.1427	43.7301	48.5392	41.7341	39.2604	2.36996	10.49	2.35175
Liquidambar_formosana_newGene_10312	0.849434	turquoise	small RNA-binding protein 11, chloroplastic [Quercus suber]		8.56232	15.4219	11.681	8.25901	10.1108	15.9009	10.1771	9.44201	2.45986	5.1252	3.83845
EVM0019656	0.75127	turquoise	heavy metal-associated isoprenylated plant protein 39-like [Durio zibethinus]		8.27918	11.2109	9.38273	8.10291	6.93231	9.42557	9.04537	7.75443	2.86242	6.05774	3.51166
EVM0017073	0.779782	turquoise	PREDICTED: protein LNK1 [Vitis vinifera]		39.8791	23.9641	26.3852	17.8502	47.3805	36.7745	37.0261	40.4052	5.90665	3.3626	4.41321
EVM0017594	0.809664	turquoise	PREDICTED: chromatin modification-related protein EAF1 B isoform X2 [Vitis vinifera]		13.3247	14.8379	20.8966	21.1626	17.1165	14.7194	13.6036	13.7307	6.27831	7.00085	7.22277
EVM0013034	0.555129	turquoise	Beta-catenin [Trema orientalis]		45.8817	33.5598	48.2761	29.0733	60.7147	56.993	54.3049	44.4927	34.291	21.4969	30.6376
EVM0021405	0.412899	turquoise	hypothetical protein CISIN_1g014932mg [Citrus sinensis]		25.7303	38.0729	53.1632	33.2332	54.8161	51.754	50.9118	51.093	38.8348	24.8908	36.0821
EVM0021409	0.844457	turquoise	PREDICTED: uncharacterized protein LOC100267937 [Vitis vinifera]		21.1931	23.8438	24.6062	31.6173	29.8854	24.5584	22.7289	23.5065	13.8154	11.5681	10.5974
EVM0017627	0.41802	turquoise	PREDICTED: cysteine-rich receptor-like protein kinase 1 [Vitis vinifera]		1.22572	1.26413	1.8608	0.078225	2.80303	2.78477	2.71093	2.3871	0.164178	0.658321	1.6359
Liquidambar_formosana_newGene_13150	0.776053	turquoise	#N/A		0.946243	4.05772	2.65873	3.40795	2.95424	4.71343	3.75158	3.61137	0.92312	1.07754	1.48399
EVM0010225	0.9041	turquoise	hypothetical protein POPTR_0014s12440g [Populus trichocarpa]		161.6	238.75	129.761	192.397	176.281	233.19	231.847	221.037	53.7882	81.7619	99.9111
Liquidambar_formosana_newGene_12202	0.863334	turquoise	endoplasmic reticulum-Golgi intermediate compartment protein 3-like [Hevea brasiliensis]		11.7335	13.3362	9.46112	9.94974	8.55816	12.1707	13.2937	11.5	1.42769	2.7932	3.64523
EVM0020750	0.870698	turquoise	PREDICTED: pentatricopeptide repeat-containing protein At1g62910 [Vitis vinifera]		1.56602	2.5539	2.49229	2.76589	2.40423	2.6895	2.59057	2.86959	0.4091	1.29706	0.837376
EVM0018260	0.564053	turquoise	hypothetical protein CFP56_17812 [Quercus suber]		5.77124	3.84663	3.95371	4.88849	11.2849	17.2402	13.9473	14.2406	0.645702	4.63421	5.22394
EVM0010072	0.854628	turquoise	PREDICTED: pentatricopeptide repeat-containing protein At5g65560 [Vitis vinifera]		3.75451	3.68659	4.37713	4.59074	2.91819	2.92164	3.56377	4.1447	1.08358	1.59087	1.24565
EVM0011307	0.525723	turquoise	hypothetical protein JCGZ_13855 [Jatropha curcas]		35.8112	56.0266	51.1307	31.2825	63.9943	66.4235	84.5551	60.3962	11.0705	34.2747	67.3137
EVM0022458	0.93844	turquoise	PREDICTED: pentatricopeptide repeat-containing protein At1g73400, mitochondrial isoform X1 [Juglans regia]		3.52205	4.0147	3.07559	4.55842	3.38518	4.27844	4.06606	4.58762	0.714849	1.17788	1.10658
EVM0023473	0.742238	turquoise	pentatricopeptide repeat-containing protein At2g41720 [Herrania umbratica]		6.8361	9.82563	12.3923	9.83232	12.708	16.4171	11.6142	11.0608	6.72281	4.96458	6.79402
EVM0023470	0.887764	turquoise	unnamed protein product [Coffea canephora]		1.52524	2.4087	1.8016	1.43467	1.756	2.1494	2.19703	2.61031	0.263004	0.461493	0.889942
Liquidambar_formosana_newGene_5499	0.538716	turquoise	hypothetical protein AMTR_s00168p00019630 [Amborella trichopoda]		0.498982	1.40154	0.523779	1.46493	1.32711	1.14715	1.07744	1.72971	0.585731	0.309452	0.952273
Liquidambar_formosana_newGene_5498	0.739393	turquoise	hypothetical protein GOBAR_AA11267 [Gossypium barbadense]		18.614	21.2098	22.7199	26.6064	25.6258	20.7902	19.6273	17.6746	10.7308	9.86505	17.0138
Liquidambar_formosana_newGene_5497	0.603234	turquoise	PREDICTED: probable mannitol dehydrogenase [Fragaria vesca subsp. vesca]		0.809147	7.30971	4.75213	4.48915	4.88477	7.70791	3.86442	2.31508	0.489892	2.50373	0.42971
EVM0000254	0.704656	turquoise	NADH kinase isoform X1 [Hevea brasiliensis]		1.76673	2.51027	2.08175	1.30909	1.34359	2.75439	1.6987	0.9571	0.518071	0.827639	0.519358
EVM0000259	0.603526	turquoise	PREDICTED: ethylene-responsive transcription factor ESR2-like [Vitis vinifera]		0.104639	6.77823	0.386974	7.18133	2.0266	5.5547	3.14852	1.00463	0	0	0.251682
EVM0007612	0.648746	turquoise	PREDICTED: 5&apos;-adenylylsulfate reductase-like 4 [Vitis vinifera]		35.3246	34.8898	53.1218	50.6451	42.0333	39.4163	33.1903	35.5239	22.6919	36.0882	27.3532
EVM0007616	0.726018	turquoise	PREDICTED: transmembrane protein 56-B-like isoform X1 [Ziziphus jujuba]		15.931	20.9243	29.9692	25.332	20.6255	23.0458	21.4315	18.2585	11.2677	12.7966	9.45445
Liquidambar_formosana_newGene_3420	0.723745	turquoise	#N/A		2.1654	3.50498	2.67915	3.62318	1.49817	2.82874	2.05337	3.06789	1.11971	1.24775	1.28249
EVM0012508	0.864492	turquoise	PREDICTED: protein CTR9 homolog [Vitis vinifera]		60.8306	68.9538	77.9621	74.2533	79.8151	66.6577	65.295	70.776	25.8724	30.9784	39.2725
EVM0002672	0.77602	turquoise	endoplasmic reticulum-Golgi intermediate compartment protein 3 [Jatropha curcas]		60.3781	52.6478	49.5225	52.9379	60.6268	70.5358	64.4834	63.6247	29.8772	49.8147	32.3386
EVM0027160	0.848491	turquoise	PREDICTED: uncharacterized protein LOC100261774 [Vitis vinifera]		19.5515	21.7725	21.5799	29.0152	23.1097	27.1795	33.657	32.7275	10.1857	14.8045	12.8267
EVM0027161	0.733868	turquoise	PREDICTED: pentatricopeptide repeat-containing protein At4g21705, mitochondrial [Vitis vinifera]		7.75728	7.31222	10.8429	4.11013	5.71511	8.85332	7.66155	5.97938	0.736948	2.69567	1.8536
EVM0018585	0.739717	turquoise	WUSCHEL-related homeobox 2-like [Quercus suber]		0.502407	15.2519	6.63456	23.4112	8.93874	8.85748	10.9682	10.4189	0.0243357	1.24492	0.909667
Liquidambar_formosana_newGene_7664	0.713267	turquoise	uncharacterized protein LOC109706190 [Ananas comosus]		0.18233	0.920875	0.410269	1.67595	0.658707	0.796081	0.998665	1.19708	0	0.0148197	0
EVM0016991	0.759066	turquoise	PREDICTED: uncharacterized protein LOC100242119 [Vitis vinifera]		38.8077	34.415	42.0264	39.781	33.5515	36.0824	31.7727	32.4556	19.0092	16.9111	22.6251
EVM0017025	0.645239	turquoise	probable inactive receptor kinase At2g26730 [Durio zibethinus]		0.71825	1.23031	0.494107	1.17611	0.71187	0.650577	0.583119	0.467083	0.0586763	0.179332	0.403497
EVM0001932	0.703204	turquoise	PREDICTED: uncharacterized transporter C405.03c-like [Juglans regia]		6.13007	14.8543	13.5542	17.0667	13.7144	8.9367	14.3508	13.2016	2.75498	4.40141	6.46177
EVM0026341	0.603699	turquoise	3-hydroxy-3-methylglutaryl-CoA synthase [Camellia sinensis]		4.85834	4.09488	3.97577	4.03792	5.5542	5.12855	5.06413	8.73543	1.84071	1.74207	4.65228
EVM0027433	0.890782	turquoise	PREDICTED: pre-mRNA-processing factor 39 isoform X2 [Vitis vinifera]		75.7647	82.6605	71.9202	88.1303	76.3388	80.8477	84.0718	71.5843	34.107	32.0959	55.9929
EVM0004143	0.851697	turquoise	cell division cycle protein 48 homolog [Manihot esculenta]		116.438	158.41	129.788	137.335	138.025	155.857	138.469	124.266	71.9696	88.3529	62.6857
EVM0010279	0.624245	turquoise	PREDICTED: probable ubiquitin-like-specific protease 2A isoform X2 [Vitis vinifera]		10.0362	15.2384	6.07127	15.3995	6.9537	9.53387	8.4737	10.1116	3.17528	3.82412	6.30997
EVM0015315	0.714203	turquoise	PREDICTED: protein indeterminate-domain 2 isoform X2 [Vitis vinifera]		55.162	90.927	82.628	81.985	119.855	143.682	163.622	144.51	55.0709	26.2639	48.8398
EVM0010895	0.393954	turquoise	PREDICTED: pyruvate dehydrogenase E1 component subunit beta-1, mitochondrial [Nelumbo nucifera]		33.2157	30.931	20.4563	32.958	46.8234	75.0712	34.002	29.8056	22.3255	42.0008	20.0312
EVM0020347	0.922204	turquoise	PREDICTED: Werner Syndrome-like exonuclease [Ipomoea nil]		19.0565	26.0221	18.4769	18.2259	24.0885	28.5676	21.6101	17.5163	4.2691	8.96699	5.93743
EVM0020340	0.908304	turquoise	PREDICTED: A-kinase anchor protein 17A isoform X1 [Vitis vinifera]		36.4207	41.6415	31.0348	29.8062	31.4266	37.2776	37.9132	38.783	13.0542	20.2423	22.4156
EVM0003262	0.849764	turquoise	hypothetical protein MANES_17G072100 [Manihot esculenta]		2.98713	4.8204	4.60712	4.75114	3.35442	4.20075	3.73153	2.55287	1.24789	1.14095	0.530365
EVM0022855	0.908544	turquoise	PREDICTED: 26S proteasome non-ATPase regulatory subunit 4 homolog [Vitis vinifera]		108.538	110.447	99.3461	100.991	105.681	119.501	106.048	99.2598	51.5863	80.7243	58.2869
EVM0022859	0.718194	turquoise	PREDICTED: pentatricopeptide repeat-containing protein At1g20300, mitochondrial [Ziziphus jujuba]		5.90574	6.17979	6.83895	6.28306	4.92106	6.51334	4.17863	4.664	1.24994	3.60773	2.88143
EVM0018400	0.85452	turquoise	PREDICTED: anaphase-promoting complex subunit 6 [Nelumbo nucifera]		13.8714	15.9489	19.9889	16.7406	15.988	12.146	13.1704	13.8508	3.28925	4.61598	5.24217
EVM0018403	0.919675	turquoise	PREDICTED: RNA-binding protein 34 [Prunus mume]		43.1344	70.1795	54.8715	62.0952	72.5595	76.3346	72.8209	71.5962	17.222	31.572	28.2185
EVM0016038	0.68295	turquoise	serine/threonine-protein kinase PEPKR2 [Morus notabilis]		26.1165	25.6688	37.0148	26.1522	30.7869	30.0963	29.9929	25.8597	11.5126	18.8122	19.0498
Liquidambar_formosana_newGene_13059	0.665992	turquoise	PREDICTED: G-type lectin S-receptor-like serine/threonine-protein kinase At4g03230 isoform X3 [Fragaria vesca subsp. vesca]		0.745553	1.39354	1.28269	1.39678	0.675337	1.09495	0.500039	0.960802	0.26162	0.28276	0.435613
Liquidambar_formosana_newGene_4951	0.745494	turquoise	hypothetical protein VITISV_029215 [Vitis vinifera]		6.82523	5.05787	6.92912	6.39824	9.57616	13.0886	13.8612	12.9476	1.02805	3.58577	4.55346
EVM0025190	0.665973	turquoise	uncharacterized protein LOC110651485 [Hevea brasiliensis]		13.7367	13.5103	12.9197	12.1941	12.2746	15.7886	15.7545	13.122	8.20042	10.2765	8.60482
EVM0025198	0.256121	turquoise	protein NRT1/ PTR FAMILY 8.1-like [Sesamum indicum]		1.35357	2.02364	0.573289	0.322706	9.60369	18.6085	11.2804	7.75772	2.1092	14.0737	0.501316
EVM0025449	0.8235	turquoise	uncharacterized protein LOC112002089 isoform X1 [Quercus suber]		25.8211	41.0444	37.7492	53.2917	60.2237	53.3353	56.2413	49.2581	13.8361	23.4409	12.4171
EVM0024719	0.865257	turquoise	PREDICTED: leukocyte receptor cluster member 1 homolog [Eucalyptus grandis]		20.2037	22.8841	22.2249	23.0378	26.6038	32.2619	32.3683	33.0912	4.24282	14.1696	11.534
EVM0024716	0.748691	turquoise	cyclin-D3-2-like [Quercus suber]		0.0692887	0.50607	0.148108	0.574074	0.474593	0.412479	0.426356	0.318346	0.0494547	0.0181097	0.0568357
EVM0024717	0.863952	turquoise	elongator complex protein 3 [Quercus suber]		24.3178	25.1635	18.2049	17.8796	20.0714	25.4937	21.3337	20.1395	11.3757	15.3529	13.4487
EVM0000866	0.854759	turquoise	Asp domain-containing protein [Cephalotus follicularis]		36.2611	44.5328	36.8282	43.0115	41.3219	34.8031	43.2463	48.3144	9.55771	26.938	24.4631
Liquidambar_formosana_newGene_6623	0.727031	turquoise	#N/A		0.735345	4.81178	1.03123	2.77216	4.63567	2.32778	4.39287	3.42322	0	0.0653937	0.171953
Liquidambar_formosana_newGene_6622	0.831375	turquoise	oligosaccaryltransferase [Medicago truncatula]		1.08641	2.27725	1.36943	1.4698	1.62121	2.07876	1.8961	2.06546	0.341063	0.535377	0.479546
EVM0009354	0.832106	turquoise	uncharacterized protein LOC109946425 [Prunus persica]		0.931463	2.61691	1.78654	1.96779	2.64827	2.93218	4.45692	3.53303	0	0.108215	0.343505
EVM0001403	0.828884	turquoise	PREDICTED: G patch domain-containing protein 8 isoform X1 [Juglans regia]		27.5031	31.6321	38.3836	36.8842	28.7968	30.4379	25.2942	27.5472	10.5392	15.8531	18.1058
EVM0006833	0.741116	turquoise	PREDICTED: protein SDE2 homolog [Vitis vinifera]		106.598	100.565	90.0133	79.0295	107.194	108.79	120.318	109.283	59.8691	71.7768	77.9471
EVM0004572	0.823266	turquoise	PREDICTED: uncharacterized protein LOC104600335 isoform X1 [Nelumbo nucifera]		6.6342	9.64732	11.9511	8.09143	7.94742	9.41527	9.60412	7.55177	2.60419	4.40501	4.9678
EVM0004579	0.87189	turquoise	PREDICTED: RNA-binding protein FUS isoform X1 [Vitis vinifera]		15.0217	14.7563	17.7565	20.1943	17.5065	15.7206	16.3428	15.3026	7.30329	11.1856	8.88832
EVM0008409	0.345556	turquoise	LOW QUALITY PROTEIN: double-stranded RNA-binding protein 1-like [Herrania umbratica]		8.39659	9.56739	9.39742	8.99914	11.4067	13.6435	9.59685	9.57207	9.10613	9.59445	7.97791
EVM0013446	0.840542	turquoise	PREDICTED: G patch domain-containing protein 11 [Ziziphus jujuba]		20.8015	21.0921	20.6876	23.8077	15.7477	16.9609	17.4192	16.6912	6.53656	9.67411	10.1868
EVM0006063	0.890464	turquoise	WD40 repeat-containing protein HOS15-like [Quercus suber]		43.9799	42.422	40.1929	49.5906	46.7088	45.2623	47.1858	47.4453	25.6485	25.0392	34.2413
EVM0020968	0.705883	turquoise	ABI3, putative isoform 4 [Theobroma cacao]		0.235077	46.1266	34.0304	32.7941	84.712	54.6789	108.563	77.728	0	0	0
EVM0020967	0.755301	turquoise	Nucleotide-diphospho-sugar transferase [Macleaya cordata]		1.95224	2.48844	4.78979	2.3801	2.06583	2.22934	2.03439	1.47759	0.119528	0.230767	0.143701
EVM0013993	0.884887	turquoise	WD repeat-containing protein VIP3 [Hevea brasiliensis]		29.5512	31.3597	21.7143	24.0474	31.228	35.8977	32.8434	26.2453	8.14336	15.0627	13.1752
EVM0007827	0.744982	turquoise	PREDICTED: UDP-glycosyltransferase 91C1 [Juglans regia]		9.08464	7.76751	3.27651	8.06452	5.94111	10.7251	4.59564	4.77968	0.413327	2.49409	0
EVM0025601	0.568215	turquoise	PREDICTED: pentatricopeptide repeat-containing protein At1g62914, mitochondrial-like isoform X1 [Nelumbo nucifera]		2.1977	2.32973	3.18335	2.81542	2.23999	2.83519	3.13643	3.61493	0.992745	2.68472	1.72059
EVM0029388	0.901784	turquoise	COMPASS-like H3K4 histone methylase component WDR5B [Durio zibethinus]		9.10263	8.25632	10.2692	9.0733	8.82969	9.5925	8.76714	7.37102	3.19568	5.16165	3.1129
EVM0029384	0.621116	turquoise	ERCC4 domain [Macleaya cordata]		6.11345	9.10629	11.7289	11.0548	8.09744	7.87397	4.75765	4.62011	3.45934	4.13081	3.68734
EVM0028382	0.804321	turquoise	LOW QUALITY PROTEIN: DEAD-box ATP-dependent RNA helicase 42-like, partial [Carica papaya]		7.97011	9.19748	12.1532	11.9036	7.96583	8.87116	8.64393	8.64782	3.46164	6.3663	4.87656
Liquidambar_formosana_newGene_4779	0.897297	turquoise	uncharacterized protein LOC109834603 [Asparagus officinalis]		10.9719	15.1939	16.2768	15.6471	12.8428	11.8166	11.3747	10.7677	2.31204	4.80086	4.36215
EVM0012850	0.815286	turquoise	PREDICTED: uncharacterized protein LOC105976874 [Erythranthe guttata]		5.4522	4.64052	4.07952	7.38051	5.00036	4.08187	4.82866	5.78522	1.39415	1.46745	2.55802
EVM0004252	0.844504	turquoise	D-3-phosphoglycerate dehydrogenase 1, chloroplastic-like [Cucurbita pepo subsp. pepo]		100.499	138.401	74.6181	71.7236	119.323	185.022	124.98	128.968	8.16626	46.8379	36.0989
Liquidambar_formosana_newGene_1086	0.505942	turquoise	hypothetical protein POPTR_008G143000v3 [Populus trichocarpa]		0.0165097	0.13732	0.079289	0.494439	0.2597	0.734238	0.858303	0.72102	0.00831367	0	0.31959
EVM0017960	0.821997	turquoise	PREDICTED: histone-lysine N-methyltransferase, H3 lysine-9 specific SUVH1 [Vitis vinifera]		28.6455	38.12	27.4208	37.7663	39.0959	43.3147	52.8938	46.4148	16.2335	22.0473	23.3846
EVM0007598	0.696166	turquoise	PREDICTED: DNA-directed RNA polymerases IV and V subunit 4 isoform X1 [Vitis vinifera]		46.7243	66.3353	48.1082	51.6047	54.101	47.8009	81.5708	85.7349	15.5552	27.6335	38.4935
EVM0007590	0.660108	turquoise	G-type lectin S-receptor-like serine/threonine-protein kinase LECRK4 [Hevea brasiliensis]		2.10535	6.30923	3.78267	7.55794	6.70436	6.30743	2.65224	1.68439	0.015161	1.33303	0.0184757
EVM0006645	0.778111	turquoise	uncharacterized protein LOC110663889 isoform X1 [Hevea brasiliensis]		0.246736	25.0507	11.607	21.3899	24.7468	25.0271	17.1996	24.685	0	0	1.68173
EVM0015478	0.748654	turquoise	PREDICTED: uncharacterized protein LOC100264919 [Vitis vinifera]		6.53053	7.77421	4.72488	5.72039	4.63175	6.55058	4.87286	4.40728	0.961469	3.18611	2.49291
EVM0015475	0.888861	turquoise	putative Protein CPR-5 [Corchorus capsularis]		56.8006	63.2878	56.4342	59.1041	65.5352	62.884	53.7043	53.6858	19.2017	21.6012	29.7492
EVM0015471	0.582713	turquoise	embryo-abundant family protein [Populus trichocarpa]		96.0047	168.406	56.2766	127.602	448.014	555.931	500.334	417.956	22.961	128.279	20.551
EVM0003698	0.779223	turquoise	PREDICTED: sphingomyelin phosphodiesterase 4 [Vitis vinifera]		6.10306	13.5287	16.1337	11.9388	14.1391	10.988	9.71468	8.99029	1.16383	3.04662	2.51701
EVM0003690	0.894257	turquoise	protein FAR1-RELATED SEQUENCE 6-like [Lactuca sativa]		7.7077	7.39915	7.32667	7.99426	7.11828	7.27645	7.21119	6.68842	2.89393	4.5774	4.95159
EVM0003691	0.817702	turquoise	PREDICTED: uncharacterized protein LOC109010967 [Juglans regia]		2.43385	2.17353	2.96781	2.32295	3.02577	3.27791	3.54778	3.43419	0.555642	1.87672	1.36875
EVM0003693	0.915939	turquoise	PREDICTED: recQ-mediated genome instability protein 1 [Vitis vinifera]		2.54066	4.15959	5.31825	4.08263	4.45047	4.56845	3.43079	3.74442	0.234209	1.01128	0.750153
EVM0007785	0.612882	turquoise	hypothetical protein CDL12_11370 [Handroanthus impetiginosus]		9.57536	13.2389	10.4931	13.3194	7.20347	8.70217	6.77274	5.44843	2.09699	5.36654	3.2026
EVM0019963	0.896251	turquoise	PREDICTED: uncharacterized protein LOC100266414 isoform X1 [Vitis vinifera]		56.5885	54.2356	58.2613	59.9232	60.0726	54.0812	60.5051	63.5784	30.8689	28.4821	36.7659
EVM0012126	0.685306	turquoise	PREDICTED: uncharacterized protein LOC100244484 isoform X3 [Vitis vinifera]		11.1165	12.715	16.2818	12.2297	18.5662	18.1137	14.1041	14.0939	8.06081	9.3007	7.61593
EVM0005698	0.76718	turquoise	Alpha-D-phosphohexomutase superfamily [Macleaya cordata]		27.3512	40.4857	37.0583	52.2827	36.2475	37.7731	40.3545	42.8322	13.6937	29.2465	16.2617
EVM0003960	0.821912	turquoise	PREDICTED: phosphoserine aminotransferase 2, chloroplastic [Vitis vinifera]		53.4292	61.8977	73.7874	56.9468	59.2888	96.2051	73.7317	79.2517	12.1417	43.5887	26.8504
EVM0003968	0.638722	turquoise	unnamed protein product, partial [Vitis vinifera]		0.482875	35.464	20.188	10.036	60.3459	38.7217	42.7746	52.5575	1.11464	0.0504893	0.335147
Liquidambar_formosana_newGene_8426	0.714625	turquoise	ankyrin repeat-containing protein NPR4 [Manihot esculenta]		5.45077	5.43083	3.61461	7.14172	5.44943	7.26112	6.07833	7.41744	2.52915	3.54872	4.51992
EVM0028859	0.767706	turquoise	prohibitin-1, mitochondrial [Amborella trichopoda]		9.4226	20.7165	18.289	4.79001	12.9479	24.1216	18.0909	13.3343	1.06952	1.86551	3.44833
EVM0026459	0.93458	turquoise	nudix hydrolase 14, chloroplastic [Carica papaya]		14.4981	24.0639	16.3187	17.5737	19.3947	20.3555	20.8107	21.438	7.11056	7.07298	8.93451
EVM0021484	0.699394	turquoise	#N/A		1.24477	3.94139	4.40931	6.78016	3.95986	2.48027	3.4076	3.79313	0.144334	0.349371	0.110237
EVM0026455	0.660085	turquoise	PREDICTED: zinc finger BED domain-containing protein RICESLEEPER 1 isoform X2 [Vitis vinifera]		14.6604	18.787	10.1962	18.6405	10.8329	14.343	11.6565	9.68434	8.7243	8.7273	7.33018
EVM0018773	0.614714	turquoise	PREDICTED: mitochondrial Rho GTPase 2 isoform X2 [Vitis vinifera]		8.06278	11.2447	13.6038	7.6223	8.78093	11.3675	7.73665	6.50708	3.73373	5.92636	4.39563
EVM0010385	0.628719	turquoise	PREDICTED: nucleolar protein 10 [Vitis vinifera]		24.6029	29.766	19.6724	19.3335	35.487	43.0513	31.9068	29.5411	18.6352	17.8083	19.9513
Liquidambar_formosana_newGene_949	0.871659	turquoise	hypothetical protein SETIT_029116mg [Setaria italica]		21.9518	42.0905	32.7181	29.9012	40.2482	50.6823	57.1595	52.7923	2.42036	5.34937	8.71367
Liquidambar_formosana_newGene_13456	0.78118	turquoise	unnamed protein product, partial [Vitis vinifera]		13.5255	21.6268	15.0227	16.8182	12.3292	14.0928	18.3468	18.8621	6.08966	9.6631	8.14632
EVM0015807	0.833039	turquoise	uncharacterized protein LOC109722603 [Ananas comosus]		0.776403	0.726781	1.0222	0.972374	0.768332	1.01459	1.19436	1.25779	0.239363	0.303723	0.159552
EVM0015802	0.888696	turquoise	PREDICTED: pentatricopeptide repeat-containing protein At4g01990, mitochondrial [Vitis vinifera]		1.95734	2.20058	2.90488	2.52614	1.83282	2.61881	2.21686	2.19907	0.428934	0.813924	0.803618
EVM0011384	0.728432	turquoise	PREDICTED: DExH-box ATP-dependent RNA helicase DExH9 isoform X1 [Vitis vinifera]		20.11	21.9671	16.2256	17.7687	28.485	32.4912	28.5632	30.3694	10.4608	11.4985	14.4014
EVM0015800	0.84865	turquoise	PREDICTED: eukaryotic translation initiation factor 3 subunit A [Vitis vinifera]		79.0055	73.8781	60.7302	56.4499	69.3382	81.9316	67.935	61.8749	22.8964	35.1619	32.7015
EVM0011386	0.547931	turquoise	integral membrane family protein [Populus trichocarpa]		6.8506	4.9208	7.76402	9.93774	8.84181	10.3915	7.80026	7.95568	1.14812	6.88722	5.13034
EVM0028467	0.63366	turquoise	PREDICTED: uncharacterized protein YKR070W-like isoform X2 [Juglans regia]		2.36596	5.09471	4.89849	3.60281	4.01384	3.8255	3.57655	4.11594	1.72159	1.73255	2.70402
EVM0028461	0.640432	turquoise	PREDICTED: FRIGIDA-like protein 4a [Vitis vinifera]		641.328	441.896	472.969	582.623	792.532	778.101	1053.29	1122.62	230.967	349.05	635.464
EVM0029266	0.567929	turquoise	PREDICTED: nuclear transcription factor Y subunit A-3-like isoform X1 [Juglans regia]		6.56369	38.2588	40.0532	73.5656	56.0159	52.1557	52.7453	46.6609	9.38773	51.2053	23.9142
Liquidambar_formosana_newGene_7702	0.643037	turquoise	PREDICTED: uncharacterized protein LOC107175499 [Citrus sinensis]		8.67552	11.695	8.55657	12.6115	9.24377	14.5038	13.8929	13.1938	5.00134	7.91634	9.0045
EVM0000129	0.623223	turquoise	PREDICTED: G-type lectin S-receptor-like serine/threonine-protein kinase At4g27290 isoform X1 [Vitis vinifera]		2.41207	0.913273	0.70396	1.62326	1.03597	1.26977	1.9097	1.88521	0.562361	0.914843	0.613024
Liquidambar_formosana_newGene_3716	0.812297	turquoise	Ribosomal_L13 domain-containing protein [Cephalotus follicularis]		3.11724	4.80331	3.52767	3.1404	3.17548	4.53295	3.14314	2.94274	1.46459	1.88312	1.38021
Liquidambar_formosana_newGene_3719	0.769234	turquoise	probable disease resistance protein At4g27220 [Quercus suber]		2.47034	3.00847	2.66603	4.58173	1.8585	2.81625	1.98511	2.59225	0.720692	1.38705	1.27049
Liquidambar_formosana_newGene_2141	0.611747	turquoise	uncharacterized protein LOC110864370 [Helianthus annuus]		4.5058	4.19672	4.45161	5.03505	2.1466	2.10849	2.47891	3.33827	0.6919	1.27324	1.71368
EVM0026613	0.786071	turquoise	PREDICTED: probable LRR receptor-like serine/threonine-protein kinase At1g56130 isoform X4 [Vitis vinifera]		25.3658	29.8132	18.0924	30.8318	25.8448	20.9864	20.9598	23.891	9.52964	11.0443	11.1605
EVM0016911	0.699519	turquoise	protein REVEILLE 7-like isoform X2 [Durio zibethinus]		9.10697	10.7459	7.97626	15.1121	19.8186	16.7164	18.5535	17.6613	7.37421	5.4911	4.79306
EVM0016913	0.793524	turquoise	PREDICTED: DEAD-box ATP-dependent RNA helicase 16 [Vitis vinifera]		8.35562	10.2516	9.24779	7.10191	8.52501	13.2531	8.70228	7.61782	2.87154	5.67023	3.48288
EVM0010547	0.759235	turquoise	PREDICTED: autophagy-related protein 18g [Vitis vinifera]		14.5554	16.4791	24.1422	21.7606	16.9217	14.0337	16.3792	15.7092	6.54538	12.5274	8.88965
EVM0010815	0.318637	turquoise	chalcone synthase 2 [Camellia chekiangoleosa]		37.0342	59.0462	11.1433	256.866	221.294	335.409	146.628	174.764	37.1906	241.458	38.685
EVM0028261	0.6658	turquoise	uncharacterized protein LOC112024342 [Quercus suber]		30.3156	36.395	26.5022	28.3051	34.3806	36.2426	34.6005	36.1358	21.1459	29.0916	28.9
EVM0028265	0.938164	turquoise	unnamed protein product, partial [Vitis vinifera]		13.8771	14.7015	15.7024	14.1595	14.6073	14.4635	13.941	12.7909	4.49359	8.11745	6.06002
EVM0018952	0.883026	turquoise	activating signal cointegrator 1-like [Quercus suber]		18.9166	20.9694	13.4592	16.3611	14.8642	18.2814	16.3936	14.1972	7.64311	10.2908	8.15637
EVM0018956	0.756971	turquoise	PREDICTED: phospholipase D zeta 1 [Vitis vinifera]		5.99098	7.20284	13.4445	11.6873	16.1637	13.9268	12.6113	12.3878	2.77606	4.01432	2.84653
EVM0015533	0.882886	turquoise	PREDICTED: histone-lysine N-methyltransferase, H3 lysine-9 specific SUVH6-like [Ziziphus jujuba]		3.75115	4.31147	3.78679	4.24002	3.50808	3.4584	3.45817	3.37107	0.797558	1.29853	1.58021
EVM0004443	0.804112	turquoise	PREDICTED: uncharacterized protein LOC100249234 isoform X2 [Vitis vinifera]		0.80829	1.17762	1.67221	1.63094	1.35678	1.26548	1.24617	1.86463	0.366985	0.379488	0.30525
EVM0018486	0.689413	turquoise	protein NUCLEAR FUSION DEFECTIVE 4 [Prunus avium]		15.1049	7.8595	9.56685	11.6819	4.23278	7.03037	8.86178	13.5852	0.554365	1.77881	3.90617
EVM0002139	0.69265	turquoise	PREDICTED: putative F-box protein At1g49610 [Nelumbo nucifera]		32.0227	34.6651	27.5897	46.7195	27.4501	27.7076	24.4949	25.4872	11.0907	15.3024	19.3105
Liquidambar_formosana_newGene_458	0.602765	turquoise	#N/A		0.592319	0.658895	1.51022	1.04572	0.940665	0.696083	0.714293	1.17754	0.361202	0.318942	0.479301
Liquidambar_formosana_newGene_457	0.730317	turquoise	PREDICTED: uncharacterized protein LOC104249122 [Nicotiana sylvestris]		0.223203	0.58926	0.633449	0.785845	0.939945	0.863709	0.708718	1.12284	0.293928	0.168259	0.367022
EVM0024934	0.735342	turquoise	PREDICTED: uncharacterized protein LOC109013739 [Juglans regia]		10.0787	9.22961	9.94831	10.4939	5.84315	6.71948	5.85937	7.46654	0.826375	2.75166	2.85407
EVM0013174	0.671432	turquoise	PREDICTED: 5&apos; exonuclease Apollo isoform X1 [Vitis vinifera]		3.60806	4.46692	3.89514	3.77597	2.75507	3.42864	2.18516	2.13743	1.54178	1.80328	1.95798
EVM0026552	0.902475	turquoise	RNA cytidine acetyltransferase 1 isoform X1 [Jatropha curcas]		18.2242	25.03	24.3609	18.1259	24.0296	23.7712	16.9956	14.3202	6.84812	10.031	7.91511
EVM0026556	0.450795	turquoise	PREDICTED: uncharacterized protein LOC100260621 isoform X1 [Vitis vinifera]		1.85932	4.40777	2.4026	2.53352	2.44643	4.1965	2.81581	2.87419	3.34951	0.759936	1.85936
EVM0013288	0.891409	turquoise	PREDICTED: phosphatidylinositol 3-kinase, root isoform isoform X1 [Vitis vinifera]		26.9518	30.2669	32.999	38.0665	29.2656	29.5838	27.7229	30.8119	13.5551	13.0493	16.882
EVM0013284	0.682548	turquoise	PREDICTED: multiple myeloma tumor-associated protein 2 homolog [Vitis vinifera]		39.4248	44.349	37.3436	33.2076	47.1101	54.5537	48.4908	44.22	30.276	33.6673	28.1609
Liquidambar_formosana_newGene_12980	0.626205	turquoise	NPR1-like protein, partial [Solanum tuberosum]		2.0392	6.18666	2.28742	5.54916	2.20781	3.66519	2.93691	2.76442	0.730737	1.07705	2.21484
EVM0013822	0.794538	turquoise	PREDICTED: uncharacterized protein LOC100255837 isoform X1 [Vitis vinifera]		16.5828	42.505	33.4101	39.3556	39.0775	47.3523	51.4025	55.6474	4.77903	23.3522	12.3065
Liquidambar_formosana_newGene_12369	0.794919	turquoise	hypothetical protein VITISV_031500 [Vitis vinifera]		0.614376	2.19241	1.96007	2.72275	2.44586	2.95807	2.61882	3.72881	0.33753	0.335656	0.66196
EVM0018105	0.545638	turquoise	DNA-directed RNA polymerases II, IV and V subunit 6A [Manihot esculenta]		160.393	234.731	136.387	144.79	186.076	220.921	200.795	194.98	157.424	142.044	114.929
EVM0011469	0.737176	turquoise	uncharacterized protein LOC111462885 [Cucurbita moschata]		14.9003	34.4048	42.2286	29.0057	46.4451	26.8929	48.645	44.7654	4.68278	12.2236	7.16504
Liquidambar_formosana_newGene_7293	0.650059	turquoise	#N/A		4.69607	11.2687	5.93247	8.38871	9.94247	9.87555	14.3238	17.5267	3.81536	5.50076	7.70387
Liquidambar_formosana_newGene_7297	0.767717	turquoise	#N/A		30.0116	39.7243	22.2403	51.107	27.6344	27.7643	32.8663	36.2591	7.54496	10.3673	19.7106
Liquidambar_formosana_newGene_7294	0.61847	turquoise	#N/A		1.32253	0.715861	0.684539	2.06605	1.62158	1.02799	1.46422	1.62019	0.0627837	0.508702	1.33874
EVM0021319	0.648598	turquoise	PREDICTED: ATP-dependent Clp protease ATP-binding subunit clpA homolog CD4B, chloroplastic-like [Nicotiana sylvestris]		0.608484	1.17407	1.3157	1.4004	1.73396	1.02344	1.37579	1.46582	0.52884	0.481547	0.66308
EVM0021315	0.785956	turquoise	protein RETICULATA, chloroplastic [Prunus avium]		20.9584	37.43	25.489	15.4868	32.9104	50.1018	33.9343	29.6267	9.71476	11.3903	10.0451
EVM0013002	0.602652	turquoise	PREDICTED: protein arginine N-methyltransferase 1.6 isoform X2 [Juglans regia]		6.55837	8.00252	6.45082	6.85845	4.11411	6.66648	3.57482	3.12435	2.5909	2.86895	3.76565
Liquidambar_formosana_newGene_14278	0.700999	turquoise	#N/A		2.26226	3.14817	4.84592	4.2945	2.71904	3.07501	3.56352	3.45213	0.988791	2.14218	1.88904
EVM0017589	0.639962	turquoise	Uncharacterized protein TCM_000598 [Theobroma cacao]		9.15232	55.0307	23.4564	92.6973	49.9429	64.6478	31.2656	30.3126	0.932821	3.20174	7.44383
Liquidambar_formosana_newGene_7571	0.810163	turquoise	DUF1423 domain-containing protein [Cephalotus follicularis]		2.10427	2.31042	1.90458	1.97919	1.93269	1.70553	2.23783	1.87283	1.03986	0.973932	0.799286
Liquidambar_formosana_newGene_5594	0.538904	turquoise	#N/A		2.60493	2.96429	1.56217	4.26133	3.45749	2.5389	2.89629	4.0528	0.800411	1.43733	2.94481
Liquidambar_formosana_newGene_5590	0.853642	turquoise	#N/A		2.71463	4.51001	4.01488	5.91867	4.80846	3.61191	5.58506	5.83826	0.462836	1.42051	1.1185
Liquidambar_formosana_newGene_5591	0.761156	turquoise	#N/A		2.90997	4.86529	5.47696	4.70814	3.71815	4.25475	3.82187	3.53156	1.19308	2.02236	2.32629
EVM0021699	0.876132	turquoise	PREDICTED: F-box/kelch-repeat protein At3g23880-like [Nicotiana attenuata]		6.43001	5.98731	7.99304	6.92788	6.23281	7.05802	6.34849	5.60288	0.800669	2.65962	2.39743
EVM0000681	0.768801	turquoise	la-related protein 6B-like [Durio zibethinus]		6.81629	8.54226	2.65016	8.68448	13.2718	10.1282	15.2263	12.1841	1.41077	1.22322	3.95581
EVM0009538	0.743074	turquoise	lipoxygenase 6, chloroplastic [Manihot esculenta]		28.6349	42.5145	16.3088	56.4516	34.5343	40.7485	39.0583	35.3709	8.04777	18.9552	17.6281
EVM0012424	0.756237	turquoise	PREDICTED: uncharacterized protein LOC100245891 [Vitis vinifera]		16.2151	16.7407	21.8902	17.7885	13.5835	17.5714	14.1698	13.7616	3.15364	8.20812	7.86595
EVM0012396	0.802446	turquoise	PREDICTED: transportin-1-like isoform X2 [Gossypium arboreum]		25.3534	23.0671	17.9452	21.591	17.6023	19.844	21.5259	25.9835	12.9918	15.2675	13.0885
EVM0002441	0.403043	turquoise	DnaJ domain-containing protein [Cephalotus follicularis]		9.84948	15.1084	15.6676	8.58765	18.243	18.7606	17.4326	15.0244	9.76873	12.0954	9.13566
EVM0006359	0.398972	turquoise	uncharacterized protein LOC105632569 [Jatropha curcas]		18.9265	21.1263	21.9019	21.4737	28.771	33.5887	29.8719	30.2118	22.2453	23.6863	17.0885
EVM0006353	0.849787	turquoise	hypothetical protein AQUCO_00200750v1 [Aquilegia coerulea]		4.15283	7.55858	11.8201	7.72676	9.57503	10.0103	12.5567	10.8773	0.252164	2.49282	3.66083
EVM0006350	0.761991	turquoise	PREDICTED: DNA (cytosine-5)-methyltransferase DRM2 [Vitis vinifera]		9.82595	13.5846	13.0032	11.8573	11.1295	12.1273	8.12007	6.81688	2.69006	3.79739	5.03319
EVM0016893	0.817364	turquoise	PREDICTED: uncharacterized protein YnbB-like isoform X1 [Malus domestica]		8.55008	8.28511	6.14804	7.01747	8.78318	8.61698	7.55415	7.42076	2.70163	3.30861	3.76204
EVM0026795	0.753511	turquoise	putative G3BP-like protein isoform X1 [Hevea brasiliensis]		33.7434	51.1175	39.9959	35.694	35.1888	46.6979	42.4098	33.0462	21.1794	30.6834	27.5319
EVM0026797	0.706182	turquoise	60S ribosomal protein L6 [Jatropha curcas]		42.8971	30.0193	25.0041	28.2132	32.6879	38.3071	31.0369	23.987	11.935	23.4988	15.8952
EVM0004840	0.761893	turquoise	PREDICTED: polypyrimidine tract-binding protein homolog 3-like [Malus domestica]		10.0106	14.9633	11.4509	14.2609	16.4199	17.682	22.2043	26.3956	5.7689	3.92733	6.69104
EVM0004847	0.629903	turquoise	#N/A		1.10985	43.7717	40.2263	179.228	123.256	132.729	236.272	211.304	0	0	0.721142
EVM0011268	0.509136	turquoise	PREDICTED: glycine-rich RNA-binding protein RZ1A [Ricinus communis]		53.5684	62.9261	35.7704	52.6088	65.4094	77.2877	75.3378	83.5384	47.5788	49.1366	47.4016
EVM0017853	0.845421	turquoise	hypothetical protein VITISV_022250 [Vitis vinifera]		3.17859	3.34981	3.13585	4.25587	2.85644	2.60735	3.64646	3.19654	0.26939	1.12699	1.72517
EVM0017851	0.763324	turquoise	glutathione S-transferase U8-like [Durio zibethinus]		273.587	864.004	363.083	570.67	559.549	806.705	559.219	467.942	57.9056	111.008	26.4527
EVM0024083	0.610559	turquoise	PREDICTED: scarecrow-like protein 27 [Vitis vinifera]		7.13354	8.85088	4.72035	12.2399	6.10283	10.0621	11.4086	11.1322	4.22865	4.22775	7.32633
EVM0029309	0.779557	turquoise	PREDICTED: probable helicase CHR10 isoform X1 [Vitis vinifera]		4.63123	8.42348	11.5204	9.92942	10.8294	8.06512	11.1139	11.8569	3.67324	3.01229	4.48878
EVM0020420	0.902285	turquoise	f-box protein [Quercus suber]		8.40673	13.6685	12.5778	11.7663	15.8377	15.2028	14.7685	14.3912	4.38185	6.53393	8.54223
EVM0020429	0.709864	turquoise	PREDICTED: cell division control protein 48 homolog C [Nelumbo nucifera]		23.5729	25.0584	24.3817	21.0624	27.5304	32.4395	31.0349	28.4253	18.412	19.7935	17.908
EVM0012987	0.664801	turquoise	PREDICTED: WD repeat-containing protein 20 homolog [Nelumbo nucifera]		60.4679	67.7104	39.5797	46.2128	49.5945	52.2721	54.3945	55.658	30.8662	43.4267	36.9324
EVM0003459	0.76608	turquoise	PREDICTED: chaperonin 60 subunit alpha 2, chloroplastic isoform X1 [Juglans regia]		5.97637	8.15416	6.82563	4.41988	4.8461	9.28226	5.42388	4.60687	1.96136	2.72078	2.29752
EVM0020740	0.785044	turquoise	PREDICTED: protein phosphatase inhibitor 2 isoform X2 [Juglans regia]		6.98389	18.086	11.9233	10.6468	16.1461	16.9117	20.3061	16.3814	5.40972	6.87732	7.2916
Liquidambar_formosana_newGene_11535	0.755191	turquoise	#N/A		3.38522	5.67124	2.54837	3.9036	2.94194	5.12808	3.28123	3.03557	0.800532	1.51366	1.41214
Liquidambar_formosana_newGene_13977	0.767583	turquoise	PREDICTED: uncharacterized protein LOC100852656 isoform X1 [Vitis vinifera]		7.9125	7.78789	7.07457	7.6317	5.40998	6.51825	6.68408	5.73843	1.61143	3.68167	3.87858
EVM0016661	0.728302	turquoise	hypothetical protein CISIN_1g022790mg [Citrus sinensis]		10.6604	11.1689	12.5775	10.2681	8.05601	10.1393	8.21969	8.05151	4.55303	7.28605	5.43499
EVM0026969	0.588903	turquoise	PREDICTED: cysteine-rich repeat secretory protein 38-like [Vitis vinifera]		3.54363	2.07511	1.75942	3.01483	0.824467	1.34916	3.68136	8.59938	0.54589	0.58694	1.0978
EVM0010675	0.717156	turquoise	probable pyridoxal 5&apos;-phosphate synthase subunit PDX1 [Jatropha curcas]		71.1404	324.829	208.896	228.787	242.791	282.686	371.672	422.223	48.4193	93.4002	15.4069
EVM0021533	0.766034	turquoise	PREDICTED: ribonuclease P protein subunit p25-like protein isoform X1 [Vitis vinifera]		12.3622	34.4229	16.6542	21.7873	31.3402	39.0383	50.1091	40.6954	3.81649	10.3166	14.2142
EVM0025099	0.610658	turquoise	PREDICTED: putative nuclease HARBI1 [Vitis vinifera]		3.32369	7.01346	5.03864	4.74122	4.09704	6.48682	3.07632	2.3038	1.47296	2.96738	2.38172
EVM0008978	0.535287	turquoise	cytochrome P450 78A5 [Quercus suber]		1.55036	107.787	42.5654	81.7364	73.5923	99.2749	89.4345	83.4396	24.1017	6.73268	21.1896
Liquidambar_formosana_newGene_4037	0.753408	turquoise	hypothetical protein [Beta vulgaris subsp. vulgaris]		2.44341	2.26119	1.77071	3.6087	1.86742	1.97208	4.05633	3.75187	0.326665	0.1941	1.10261
Liquidambar_formosana_newGene_1001	0.789724	turquoise	fructose-bisphosphate aldolase, cytoplasmic isozyme 1 [Hevea brasiliensis]		4.36051	3.11162	4.4638	4.71309	1.76641	2.89265	3.83988	3.31116	0.602535	1.19708	1.62638
EVM0001726	0.893551	turquoise	FAR1 DNA binding domain [Macleaya cordata]		3.48574	5.14142	4.55038	5.54632	6.9535	5.91252	7.22471	7.18506	0.962756	1.73876	1.93688
EVM0001724	0.850278	turquoise	PREDICTED: heterogeneous nuclear ribonucleoprotein F isoform X1 [Gossypium raimondii]		81.6711	89.9033	67.0925	76.8433	67.699	86.4562	91.374	84.0241	38.8014	57.2631	52.2331
EVM0006978	0.813889	turquoise	PREDICTED: 11-beta-hydroxysteroid dehydrogenase 1B-like [Nelumbo nucifera]		1.40406	2.05865	1.28121	2.04858	2.92885	1.75404	5.40897	13.9323	0.040168	0.288568	0.227562
Liquidambar_formosana_newGene_9787	0.654867	turquoise	PREDICTED: uncharacterized protein LOC100852760 [Vitis vinifera]		2.14692	6.97489	2.66607	4.41733	5.00801	1.91456	4.32565	3.54216	0.144913	0.484399	1.21105
Liquidambar_formosana_newGene_5959	0.813923	turquoise	disease resistance protein At4g27190-like [Quercus suber]		2.48661	4.5407	3.4446	4.04128	3.70733	3.23356	3.87637	3.78398	0.764744	1.35949	1.14296
EVM0015749	0.861336	turquoise	RNA-binding protein 42-like [Cucurbita pepo subsp. pepo]		37.1634	39.01	39.0828	40.7478	44.1511	47.9315	43.145	40.7119	22.9106	28.0624	22.5736
EVM0012212	0.85052	turquoise	PREDICTED: jmjC domain-containing protein 7 isoform X1 [Vitis vinifera]		10.0929	7.53739	4.99648	10.1838	7.6537	8.73709	7.3918	9.12753	1.63386	1.99626	3.18766
EVM0007766	0.711336	turquoise	PREDICTED: pentatricopeptide repeat-containing protein At3g53360, mitochondrial [Vitis vinifera]		2.33862	3.25258	5.06459	4.67291	3.42824	4.43704	3.43307	4.31392	0.796483	1.72861	1.47374
Liquidambar_formosana_newGene_1879	0.846177	turquoise	uncharacterized protein LOC111997395 [Quercus suber]		0.64122	0.532419	0.488756	0.817178	0.511887	0.794531	0.443446	0.637308	0	0.091118	0.0656043
Liquidambar_formosana_newGene_1874	0.724512	turquoise	Amidohydrolase 1 [Macleaya cordata]		1.40188	2.38852	3.14947	2.37965	3.22468	2.7627	2.71554	3.30281	1.08237	1.82724	1.48965
EVM0001812	0.733754	turquoise	PREDICTED: probable folate-biopterin transporter 7 [Juglans regia]		7.4767	11.0183	6.49468	13.7646	16.3066	7.95866	9.01702	15.3646	2.45301	1.71328	2.71856
EVM0004860	0.541273	turquoise	PREDICTED: pentatricopeptide repeat-containing protein At4g38010 [Vitis vinifera]		1.98902	3.37558	1.42767	2.81592	2.12981	3.05366	2.44679	3.4777	1.98557	1.39272	1.62693
EVM0006493	0.846673	turquoise	PREDICTED: E3 ubiquitin-protein ligase SP1 [Nelumbo nucifera]		15.8597	18.764	12.6904	16.6902	13.5253	16.484	15.1502	12.686	6.91739	7.11465	9.56507
EVM0005617	0.727299	turquoise	PREDICTED: transcription initiation factor TFIID subunit 12, partial [Vitis vinifera]		18.5535	29.7009	24.7128	20.3337	35.8845	39.5904	35.2482	35.142	14.9517	10.0177	14.6992
EVM0016468	0.814848	turquoise	Deoxynucleoside kinase domain containing protein [Parasponia andersonii]		36.1479	38.2597	28.4932	32.3836	29.753	38.1592	38.432	43.9933	15.5903	11.6118	22.0141
EVM0016462	0.475263	turquoise	PREDICTED: uncharacterized protein LOC100245550 [Vitis vinifera]		6.70077	7.56341	8.50981	11.2087	11.0979	9.62356	9.52993	10.3411	7.76053	6.50704	8.3757
EVM0027585	0.175791	turquoise	PREDICTED: uncharacterized protein LOC100251003 isoform X2 [Vitis vinifera]		66.64	48.1887	53.1397	50.222	75.7636	72.5158	70.0555	76.0959	69.096	60.2453	54.6714
EVM0017333	0.958257	turquoise	probable E3 ubiquitin-protein ligase HIP1 [Quercus suber]		15.188	18.5386	17.0876	18.8553	16.835	18.3656	17.7489	19.8169	8.98576	11.1235	8.74184
EVM0013654	0.79077	turquoise	PREDICTED: uncharacterized protein LOC100243326 isoform X2 [Vitis vinifera]		14.855	20.694	18.2918	24.8623	27.8048	23.887	22.7222	22.9781	12.2969	12.1855	12.5731
EVM0013650	0.70013	turquoise	PREDICTED: disease resistance protein RPM1-like [Nelumbo nucifera]		1.06646	0.618815	0.828619	1.20279	0.990998	1.04525	1.40896	1.98907	0.139353	0.553045	0.515325
EVM0010304	0.734745	turquoise	uncharacterized protein LOC112024067 [Quercus suber]		124.059	174.662	199.299	109.18	149.291	119.083	70.4601	46.8241	1.0539	47.3147	1.47298
EVM0019421	0.74898	turquoise	gibberellin receptor GID1B [Jatropha curcas]		109.471	63.2487	101.322	86.9818	74.4521	70.4868	82.8242	62.3206	7.12985	70.9167	12.9244
EVM0011659	0.788082	turquoise	PREDICTED: DDT domain-containing protein DDB_G0282237 isoform X1 [Juglans regia]		35.8667	54.5014	42.3997	54.7766	50.2913	59.22	35.7919	30.8898	17.4718	23.5551	23.8046
EVM0014176	0.924972	turquoise	uncharacterized protein LOC110613674 [Manihot esculenta]		16.1206	17.4678	18.2135	14.9344	18.5638	20.227	15.8371	15	3.4792	6.86896	8.05405
EVM0025520	0.754773	turquoise	PREDICTED: N-acylphosphatidylethanolamine synthase [Vitis vinifera]		14.6067	18.962	14.2044	14.0143	14.0111	15.5686	11.1887	9.40478	6.37146	10.4962	7.10593
EVM0021633	0.824158	turquoise	PREDICTED: uncharacterized protein LOC105973193 [Erythranthe guttata]		2.62363	6.71531	3.72221	4.42209	5.49832	8.03337	10.5324	9.55925	0.0570963	0.352858	0.993943
EVM0015225	0.800663	turquoise	PREDICTED: non-structural maintenance of chromosomes element 4 homolog A [Vitis vinifera]		8.14001	13.4242	16.1675	15.344	13.9831	13.2745	12.2447	12.0443	6.01898	9.13879	5.88531
EVM0024692	0.499872	turquoise	molybdopterin synthase catalytic subunit [Carica papaya]		6.86351	8.62784	6.04338	5.61409	16.6029	17.0141	16.7432	16.7136	5.83313	6.33764	6.68987
EVM0027919	0.530377	turquoise	PREDICTED: uncharacterized protein LOC18600062 [Theobroma cacao]		0.601083	7.62224	4.64393	6.88806	40.0272	32.5066	38.1994	53.6086	1.28139	2.27984	10.4506
Liquidambar_formosana_newGene_10699	0.743037	turquoise	hypothetical protein VITISV_011546 [Vitis vinifera]		3.44452	3.70394	1.72479	5.64587	2.76615	3.05186	2.82149	3.62149	0.208601	0.424643	1.56608
EVM0018536	0.753915	turquoise	PREDICTED: ribosome biogenesis protein WDR12 homolog [Vitis vinifera]		47.7541	49.2904	30.5273	34.8945	34.9394	48.2701	38.5408	31.8509	22.92	23.8721	28.5214
EVM0016144	0.73787	turquoise	PREDICTED: putative F-box protein At1g49610 isoform X1 [Eucalyptus grandis]		36.3859	44.4372	41.5892	51.898	45.1955	45.1614	57.1495	56.1253	27.8628	34.8247	29.9005
EVM0010934	0.923237	turquoise	PREDICTED: zinc finger protein ZPR1 [Vitis vinifera]		18.7759	28.8282	24.7839	20.1737	24.0114	30.1656	26.1371	21.616	8.71644	13.1913	11.0197
Liquidambar_formosana_newGene_3239	0.852942	turquoise	#N/A		3.71345	3.87735	2.50294	3.93038	3.2399	3.96285	4.5408	3.79532	0.674711	0.785834	1.39447
Liquidambar_formosana_newGene_3906	0.645169	turquoise	Glycoside hydrolase, family 9 [Corchorus olitorius]		0.978287	1.91364	3.20069	2.49901	2.49299	1.87855	2.10234	3.06958	0.344036	0.591108	0.322358
EVM0007940	0.378538	turquoise	PREDICTED: probable (S)-N-methylcoclaurine 3&apos;-hydroxylase isozyme 2 [Vitis vinifera]		0.147152	0.104499	0.483768	0.266736	0.50832	0.422563	1.16286	0.621087	0.00740933	0.352907	0
EVM0020914	0.611445	turquoise	PREDICTED: PLASMODESMATA CALLOSE-BINDING PROTEIN 3 isoform X1 [Vitis vinifera]		2.31006	12.0346	4.5478	4.78401	18.6491	15.3282	18.2361	11.8857	0.177173	1.1745	1.90833
EVM0018064	0.751034	turquoise	hypothetical protein CRG98_019800 [Punica granatum]		4.01074	5.10084	4.15989	5.91461	2.39346	3.33262	2.95424	3.68508	0.912729	1.64498	1.84177
EVM0001393	0.695285	turquoise	uncharacterized protein LOC112012730 [Quercus suber]		1.81585	6.45213	3.3613	5.80577	4.24079	3.81805	7.74014	8.22054	0.358858	1.4905	1.90331
EVM0000441	0.854055	turquoise	pentatricopeptide repeat-containing protein At1g69290 [Prunus persica]		6.03652	8.32409	6.23878	8.27062	6.07592	6.23757	5.63009	6.07948	2.00154	3.06921	3.23842
EVM0002775	0.504901	turquoise	hypothetical protein CCACVL1_15744 [Corchorus capsularis]		31.8863	52.6682	69.3876	32.584	74.3642	93.5239	93.8583	77.8132	42.5209	31.6419	50.685
Liquidambar_formosana_newGene_2742	0.869637	turquoise	hypothetical protein VITISV_041775 [Vitis vinifera]		1.1893	1.28453	0.614109	1.33594	1.38769	1.55221	1.36338	1.34808	0.228737	0.127249	0.249803
Liquidambar_formosana_newGene_2744	0.782593	turquoise	hypothetical protein VITISV_038270 [Vitis vinifera]		0.931918	1.80497	1.34559	1.91091	0.975708	1.30306	1.02016	0.991601	0.348462	0.303017	0.492683
EVM0006725	0.845305	turquoise	PREDICTED: phosphatidylinositol 4-kinase gamma 5 [Vitis vinifera]		114.828	75.8345	74.2388	100.777	72.0539	68.4361	76.5859	81.5296	25.2731	34.3338	43.9255
EVM0004372	0.927691	turquoise	PREDICTED: uncharacterized protein LOC108996956 [Juglans regia]		17.1771	22.0094	14.0947	21.7512	16.3652	19.5014	20.0937	18.6231	4.05752	5.78316	9.42262
EVM0004373	0.618136	turquoise	PREDICTED: U-box domain-containing protein 9 [Vitis vinifera]		6.98731	2.36986	5.97153	5.46409	3.30596	3.15549	4.61579	4.50583	0.623358	3.60182	1.35711
EVM0004375	0.790101	turquoise	PREDICTED: uncharacterized protein LOC100267879 isoform X1 [Vitis vinifera]		10.6824	11.9481	16.7007	13.6328	13.3729	12.7229	10.4385	10.8769	4.44315	7.65294	5.72448
EVM0008719	0.717755	turquoise	DNA repair protein RAD51 homolog 3 [Quercus suber]		1.41764	1.62502	0.94461	0.840564	1.30708	1.66245	1.05959	0.936029	0.388513	0.470998	0.821259
EVM0012003	0.530037	turquoise	Cytochrome c oxidase copper chaperone [Trema orientalis]		9.52273	16.47	15.627	14.9337	13.3767	18.1048	16.2229	15.7796	9.56731	15.2516	10.0178
EVM0005408	0.898663	turquoise	crooked neck-like protein 1 [Momordica charantia]		39.0359	35.3075	25.9078	35.5946	31.315	33.1972	34.5834	32.3051	12.0542	15.9122	20.3247
EVM0028953	0.659844	turquoise	putative pentatricopeptide repeat-containing protein At1g12700, mitochondrial [Helianthus annuus]		1.65119	2.4771	1.51931	2.75432	1.34252	2.12359	1.66527	1.7802	0.477497	0.985173	1.1137
EVM0028954	0.756402	turquoise	pentatricopeptide repeat-containing protein At2g20710, mitochondrial-like [Quercus suber]		15.1237	16.622	15.369	12.71	12.8709	15.1961	9.82932	9.86169	3.38983	7.33421	6.60595
Liquidambar_formosana_newGene_8293	0.612416	turquoise	PREDICTED: uncharacterized protein LOC108983648 [Juglans regia]		0.712219	1.21149	2.06404	1.66097	1.37091	1.48486	1.55013	1.31911	0.479897	0.730837	0.827394
Liquidambar_formosana_newGene_8295	0.729293	turquoise	ATP-dependent Clp protease proteolytic subunit 5, chloroplastic-like [Arachis ipaensis]		3.33039	3.62142	3.06176	3.1558	3.3454	3.03309	3.23974	2.98772	1.66723	2.02941	1.9692
EVM0017784	0.782778	turquoise	K Homology domain [Macleaya cordata]		34.6197	32.7703	35.2219	29.0221	38.7663	35.1424	49.1864	47.2117	17.9302	20.5168	17.2064
EVM0024821	0.563434	turquoise	PREDICTED: peptidyl-prolyl cis-trans isomerase FKBP20-1 isoform X1 [Nelumbo nucifera]		45.1606	79.6899	54.7361	67.6641	61.1626	58.281	69.5435	73.3841	39.6332	70.105	48.1264
EVM0019800	0.425913	turquoise	PII protein [Paeonia suffruticosa]		40.8646	62.602	33.9375	38.4288	40.628	49.3986	66.1405	60.8856	19.4839	36.9551	47.3819
EVM0010409	0.775491	turquoise	DUF167 domain-containing protein [Cephalotus follicularis]		18.5618	32.0348	24.4682	18.9296	29.3323	36.6132	27.1061	26.8551	11.6855	17.886	13.7743
EVM0020813	0.905118	turquoise	PREDICTED: wiskott-Aldrich syndrome protein homolog 1-like [Juglans regia]		56.9765	64.0253	49.8369	64.2436	51.3727	51.9647	51.7214	48.8771	18.3651	25.845	22.3969
EVM0019582	0.832287	turquoise	2-oxoglutarate-Fe(II) type oxidoreductase isoform X1 [Quercus suber]		9.2889	12.3725	10.2364	8.72636	10.1397	12.5197	11.4118	10.9978	4.722	8.3944	6.72437
EVM0011752	0.625847	turquoise	isoform 3 of transcriptional corepressor [Quercus suber]		0.300058	5.93089	5.1128	12.5117	8.67574	6.92312	5.74405	8.89666	0	0.0844607	0.387501
EVM0024244	0.740358	turquoise	PREDICTED: uncharacterized protein LOC100254109 [Vitis vinifera]		10.9493	15.2221	16.9158	14.1897	20.0045	18.5281	16.696	16.2221	8.50658	11.1552	8.57554
EVM0021397	0.862601	turquoise	hypothetical protein POPTR_T003000v3 [Populus trichocarpa]		5.28516	4.18708	3.51494	4.52331	4.03902	3.35825	5.57112	5.20169	0.77025	1.81558	1.62766
Liquidambar_formosana_newGene_7067	0.774013	turquoise	Utp11 domain-containing protein [Cephalotus follicularis]		1.50138	2.98296	3.20538	2.24451	4.28896	4.04543	4.89874	4.55991	0.394534	0.44858	1.06686
Liquidambar_formosana_newGene_7063	0.844172	turquoise	#N/A		0.873264	1.94881	2.25687	2.50278	2.02818	1.88492	1.96374	2.22631	0.290961	0.258502	0.301306
EVM0020047	0.832764	turquoise	PREDICTED: putative F-box protein At1g49610 [Nelumbo nucifera]		2.98705	5.62733	4.35307	6.18288	5.45122	5.55144	5.50215	6.77193	3.08187	2.21382	3.44773
EVM0002994	0.73367	turquoise	uncharacterized protein LOC112028335 isoform X2 [Quercus suber]		8.64091	13.3145	14.8268	12.9353	10.3562	10.0661	9.6036	7.92424	3.51371	5.96229	4.6314
EVM0021920	0.914831	turquoise	PREDICTED: nucleolin isoform X1 [Vitis vinifera]		74.0352	83.0829	60.2291	86.878	61.9871	72.5949	73.8798	77.6463	33.8176	42.0069	41.9489
EVM0004750	0.845655	turquoise	PREDICTED: protein N-lysine methyltransferase METTL21A [Vitis vinifera]		13.8988	13.694	12.1062	9.35541	10.5982	17.0794	16.02	19.0951	1.23098	5.32716	5.77943
Liquidambar_formosana_newGene_12662	0.616225	turquoise	putative LOV domain-containing protein [Tetrastigma voinierianum]		1.24828	2.8141	1.29044	2.89174	1.46079	1.94504	1.89175	1.01219	0.283805	0.279012	0.646046
Liquidambar_formosana_newGene_8171	0.776454	turquoise	PREDICTED: histidine-containing phosphotransfer protein 2 [Vitis vinifera]		7.97135	12.4227	12.3104	7.177	7.80383	7.98127	10.3528	13.1389	3.71065	2.05023	3.43653
EVM0008269	0.824406	turquoise	PREDICTED: GATA transcription factor 28 [Ziziphus jujuba]		24.4792	30.8451	27.2212	22.6669	27.8112	32.6274	26.673	30.1603	16.1845	22.261	17.8939
EVM0008844	0.788454	turquoise	hypothetical protein POPTR_014G164900v3 [Populus trichocarpa]		5.27172	9.00056	6.65136	7.10191	10.2007	12.3675	14.861	14.5566	1.06328	1.5825	3.56208
EVM0008845	0.859738	turquoise	pentatricopeptide repeat-containing protein At1g66345, mitochondrial-like [Quercus suber]		3.25713	3.8752	4.72377	4.30722	3.87828	3.10975	3.31379	3.19825	0.87258	1.80178	1.86585
Liquidambar_formosana_newGene_3009	0.872845	turquoise	hypothetical protein CFP56_45525 [Quercus suber]		1.0665	1.75223	0.808042	1.48484	1.5999	1.61275	1.28708	1.40251	0.003247	0.06357	0.307609
EVM0016810	0.776107	turquoise	PREDICTED: COP9 signalosome complex subunit 5b [Vitis vinifera]		89.1339	100.203	56.274	84.1366	72.8366	89.9421	74.635	68.7136	40.0912	60.1309	49.4601
EVM0028304	0.712809	turquoise	PREDICTED: pentatricopeptide repeat-containing protein At1g77360, mitochondrial-like [Malus domestica]		17.6674	13.4799	12.9469	16.3761	8.41725	10.6278	9.31378	9.36062	2.09817	6.6747	5.60458
EVM0014504	0.817603	turquoise	PREDICTED: F-box protein At3g07870-like [Daucus carota subsp. sativus]		2.26091	2.84139	3.09368	2.75296	1.7017	2.63559	1.39814	2.14782	0.425795	0.663592	0.567638
EVM0010604	0.740201	turquoise	uncharacterized protein At1g04910 isoform X1 [Jatropha curcas]		5.79483	8.09324	8.58772	6.01983	6.21084	7.13542	6.15523	5.50292	1.5088	3.80726	2.67255
EVM0014982	0.489816	turquoise	PREDICTED: uncharacterized protein LOC100246460 [Vitis vinifera]		18.3815	28.2566	40.3055	25.3563	48.1792	44.6825	59.8086	51.0705	24.7631	25.6831	23.7923
EVM0012905	0.62153	turquoise	PREDICTED: SPX domain-containing protein 4 [Vitis vinifera]		24.6801	17.2357	16.2702	14.9552	28.5902	32.6498	31.5885	30.2282	14.3536	10.3728	10.7072
EVM0028038	0.785102	turquoise	PREDICTED: histone H3.2 [Musa acuminata subsp. malaccensis]		100.568	225.485	255.118	131.199	209.26	176.281	132.012	81.6556	2.10235	10.8806	23.5365
EVM0016378	0.896125	turquoise	PREDICTED: transcription termination factor MTEF18, mitochondrial [Vitis vinifera]		3.16047	4.41737	4.82677	3.67519	3.74815	5.10887	4.31674	3.87248	1.47001	2.11491	1.72632
Liquidambar_formosana_newGene_10261	0.882597	turquoise	hypothetical protein POPTR_005G225000v3 [Populus trichocarpa]		4.83277	6.96703	4.09771	4.01499	6.76611	7.42505	6.73353	7.97517	0.891426	1.38756	1.84156
EVM0024835	0.716432	turquoise	pentatricopeptide repeat-containing protein At1g31430-like [Quercus suber]		3.91254	5.2411	4.64254	4.04568	3.35883	4.46011	3.83072	3.65826	1.92947	2.38906	2.66719
EVM0007307	0.697015	turquoise	PREDICTED: cinnamoyl-CoA reductase 2 [Vitis vinifera]		73.0073	160.108	86.8164	161.18	82.2549	98.4525	53.0832	31.6358	16.0978	40.8977	11.686
EVM0016599	0.81497	turquoise	PREDICTED: uncharacterized protein LOC104881665 isoform X2 [Vitis vinifera]		2.87989	2.36295	2.51879	3.20631	2.40148	2.73251	3.24234	3.73432	0.268886	0.824575	1.73247
EVM0016590	0.873652	turquoise	hypothetical protein VITISV_018985 [Vitis vinifera]		14.2562	18.8533	23.4794	16.0654	19.7737	23.1795	19.2803	20.109	8.09711	7.56794	9.67458
EVM0016592	0.848645	turquoise	PREDICTED: topless-related protein 4 isoform X2 [Vitis vinifera]		58.2322	49.6955	48.2363	69.1163	56.9371	44.812	55.195	69.3142	28.5958	26.0229	32.5941
Liquidambar_formosana_newGene_8558	0.66483	turquoise	PsbA, partial (plastid) [Poa annua]		1.73201	2.81612	1.09738	2.393	1.38794	2.00043	1.05406	1.53437	0.325873	0.597218	0.83935
EVM0017420	0.790013	turquoise	PREDICTED: DNA-directed RNA polymerase III subunit RPC6-like [Vitis vinifera]		7.56737	15.0197	8.92256	15.5348	9.91387	11.6007	13.446	9.90062	1.69681	4.81237	8.05668
EVM0002451	0.909498	turquoise	hypothetical protein AQUCO_01500442v1 [Aquilegia coerulea]		7.40855	5.15335	4.90042	6.99806	5.2347	5.99918	7.07538	8.30789	1.10557	1.48243	2.03867
EVM0002452	0.865528	turquoise	Pro_isomerase domain-containing protein [Cephalotus follicularis]		88.621	103.217	78.4706	81.2429	104.994	126.275	98.2082	95.6823	51.9392	46.0967	49.5424
EVM0020994	0.737019	turquoise	PREDICTED: transcription factor E2FB [Vitis vinifera]		8.94794	10.8903	18.9137	12.3505	12.077	10.1857	13.036	12.618	2.38137	5.68078	7.30456
EVM0020662	0.861215	turquoise	PREDICTED: non-lysosomal glucosylceramidase isoform X1 [Vitis vinifera]		16.6324	25.9816	23.2471	23.0453	27.0204	27.4148	26.3458	29.0342	12.3115	10.2475	16.4113
EVM0022292	0.851127	turquoise	uncharacterized protein LOC18773314 isoform X3 [Prunus persica]		11.0445	9.09007	8.33173	10.4266	9.0193	8.8011	10.0833	8.92087	3.20308	5.01935	4.03371
EVM0029020	0.84095	turquoise	PREDICTED: pentatricopeptide repeat-containing protein At4g28010 [Vitis vinifera]		3.80088	4.10526	3.84361	5.42001	3.54813	4.58841	4.76459	4.56439	0.763988	1.95285	1.55033
EVM0029027	0.604048	turquoise	uracil phosphoribosyltransferase family protein [Populus trichocarpa]		28.8085	32.0038	29.5562	23.8494	32.6143	32.8892	40.3636	40.5034	19.0988	21.5123	32.2023
EVM0029029	0.825314	turquoise	PREDICTED: F-box protein SKIP8 [Vitis vinifera]		26.8579	33.6401	25.8728	23.3883	38.3747	41.7676	41.9969	37.413	10.3574	15.8766	13.6935
EVM0019044	0.648023	turquoise	PREDICTED: uncharacterized protein LOC104595391 isoform X2 [Nelumbo nucifera]		24.0691	35.1861	47.7149	27.7686	34.9493	37.9667	40.0835	35.2487	18.4798	19.3906	30.7308
EVM0019042	0.948558	turquoise	hypothetical protein GOBAR_AA26075 [Gossypium barbadense]		4.38942	5.38643	4.07585	5.80354	4.47386	5.41822	5.61478	5.84545	0.547976	1.39179	1.55814
EVM0001050	0.56427	turquoise	DExH-box ATP-dependent RNA helicase DExH3 isoform X2 [Quercus suber]		2.51811	4.91112	4.79818	5.24644	5.18238	5.10978	5.88999	5.55442	3.61966	3.50554	4.54912
EVM0003586	0.799784	turquoise	PREDICTED: uncharacterized protein At2g29880-like [Elaeis guineensis]		3.79102	5.74067	6.12411	5.75954	3.94295	5.80582	4.66632	4.35669	0.97055	2.61443	1.81579
Liquidambar_formosana_newGene_10104	0.489914	turquoise	#N/A		1.12478	3.08484	2.55076	2.03291	3.16394	4.34982	2.97807	3.67114	1.48493	2.24709	1.61827
EVM0010830	0.555248	turquoise	PREDICTED: uncharacterized protein LOC103491288 [Cucumis melo]		39.8922	58.6075	36.1261	96.6152	65.4165	44.6054	67.853	62.5336	36.2232	44.2301	46.4856
EVM0010831	0.554855	turquoise	PREDICTED: phosphatidylinositol transfer protein CSR1 [Vitis vinifera]		7.75919	9.9001	10.3359	7.53542	8.58742	11.1306	13.7308	16.7538	5.88547	5.27582	10.7066
EVM0009476	0.89467	turquoise	PREDICTED: uncharacterized protein LOC107428818 isoform X1 [Ziziphus jujuba]		18.5388	29.3559	17.9462	22.0776	21.7889	24.8522	21.9998	19.3477	5.87652	8.57388	11.0783
Liquidambar_formosana_newGene_8468	0.657765	turquoise	PREDICTED: probable BOI-related E3 ubiquitin-protein ligase 2 [Populus euphratica]		0.0582137	1.55345	1.81141	2.40527	1.72554	1.1117	1.10105	1.71416	0.0182923	0	0
EVM0027676	0.668847	turquoise	ER lumen protein retaining receptor [Macleaya cordata]		41.9665	85.7115	51.4915	45.0832	133.133	133.008	137.169	117.069	18.8872	31.3197	20.9546
EVM0004925	0.749399	turquoise	PREDICTED: AP-5 complex subunit mu [Vitis vinifera]		13.1308	18.4203	16.3954	17.2289	25.2988	28.8715	28.9533	30.7935	4.99949	10.0249	9.04867
EVM0026103	0.916374	turquoise	PREDICTED: uncharacterized protein LOC109002423 isoform X2 [Juglans regia]		27.9666	19.8021	22.5145	17.6037	20.3914	18.055	18.4188	14.4816	1.51326	6.61325	6.69893
Liquidambar_formosana_newGene_911	0.696444	turquoise	glycerol kinase [Morus notabilis]		5.97834	6.46713	5.21864	5.16745	3.6226	4.64789	3.72993	4.00766	1.27928	2.27491	2.57122
Liquidambar_formosana_newGene_12753	0.682039	turquoise	#N/A		0	1.83852	0.384744	0.516517	1.91697	1.00841	1.50321	2.36972	0	0.00983	0
EVM0007520	0.727649	turquoise	#N/A		13.1256	16.1716	7.21387	15.7815	7.75601	9.76956	11.1312	10.5414	2.38503	4.67798	6.22448
EVM0005806	0.757616	turquoise	zf-C3HC4_2 domain-containing protein [Cephalotus follicularis]		9.50557	29.7499	25.4416	20.9829	27.8578	32.8431	20.9212	19.157	3.45112	7.61374	4.32601
EVM0005809	0.86521	turquoise	PREDICTED: pentatricopeptide repeat-containing protein At1g09820 [Vitis vinifera]		6.90138	10.085	7.88533	11.6952	7.02894	8.89281	9.02542	10.5395	3.52034	3.54181	6.16962
EVM0003314	0.567309	turquoise	PREDICTED: OTU domain-containing protein 3 isoform X1 [Vitis vinifera]		3.88635	4.73543	3.7065	2.23714	3.14732	3.41929	3.22344	2.88329	1.65782	2.38698	2.32157
Liquidambar_formosana_newGene_11474	0.842793	turquoise	#N/A		7.18604	14.2404	4.74341	13.0115	11.1811	11.8816	16.0258	15.0286	1.63825	2.80917	2.17954
EVM0004659	0.838101	turquoise	PREDICTED: 65-kDa microtubule-associated protein 5 isoform X1 [Vitis vinifera]		22.9539	20.6562	17.0062	13.6657	17.5005	17.6757	13.8601	13.6462	0.35339	3.56584	4.30017
EVM0019997	0.307162	turquoise	glutamate--cysteine ligase, chloroplastic isoform X1 [Quercus suber]		42.7943	28.7977	22.0724	38.4433	31.3656	39.8593	30.4797	33.9943	25.5863	33.5465	32.3213
EVM0019665	0.649554	turquoise	PREDICTED: uncharacterized protein LOC100262507 isoform X5 [Vitis vinifera]		25.4216	28.9602	29.0587	45.0265	25.2719	22.0267	26.2377	30.407	16.8292	13.5991	19.9896
Liquidambar_formosana_newGene_5278	0.731048	turquoise	IFRD_C domain-containing protein/IFRD domain-containing protein [Cephalotus follicularis]		10.6637	18.2282	10.1849	14.0336	8.6782	12.387	10.135	9.75117	2.49323	3.50267	5.46602
Liquidambar_formosana_newGene_5276	0.94057	turquoise	protein nrt1/ ptr family 5.5 [Quercus suber]		11.9565	15.8346	8.88788	15.7293	13.2068	16.0705	14.3831	14.0572	2.49626	2.54346	4.43693
EVM0021477	0.705849	turquoise	PREDICTED: mediator of RNA polymerase II transcription subunit 30-like [Juglans regia]		14.0864	14.5025	17.5637	12.9104	10.9857	13.4685	10.3588	10.4313	2.85494	7.30612	6.1301
EVM0013594	0.574058	turquoise	PREDICTED: 2-keto-3-deoxy-L-rhamnonate aldolase [Ziziphus jujuba]		42.0678	38.4413	38.889	39.5095	20.3371	19.8179	19.3565	18.4719	7.26084	20.5272	11.6049
EVM0010027	0.886925	turquoise	E3 ubiquitin-protein ligase KEG isoform X2 [Jatropha curcas]		24.3891	29.914	40.9557	32.2035	34.5542	32.5912	34.4797	35.196	12.9407	16.4781	17.4262
EVM0010029	0.64666	turquoise	PREDICTED: heat stress transcription factor B-2a-like [Glycine max]		36.981	15.1742	41.3166	3.43736	44.3162	60.8875	41.7049	31.3255	2.74524	4.09902	4.86667
EVM0025208	0.72379	turquoise	TVP38/TMEM64 family membrane protein slr0305-like protein, partial [Trifolium pratense]		36.6072	55.1208	89.5257	63.6968	61.5413	65.5918	71.3598	69.348	24.2563	46.261	37.337
EVM0022468	0.647163	turquoise	acyl carrier protein [Camellia japonica]		183.79	278.345	246.986	223.667	260.918	260.552	249.08	195.948	94.3078	191.783	147.58
EVM0024151	0.692586	turquoise	LOW QUALITY PROTEIN: putative pentatricopeptide repeat-containing protein At1g12700, mitochondrial [Prunus avium]		2.45513	2.14039	2.21572	2.88394	1.54698	1.77056	1.53223	2.15119	0.484135	0.63779	0.562886
EVM0000199	0.886744	turquoise	prolyl endopeptidase-like isoform X4 [Quercus suber]		35.0318	36.8406	34.4246	33.5459	35.2681	31.0778	24.8097	25.7142	9.95462	12.5751	8.82344
EVM0000196	0.674746	turquoise	PREDICTED: uncharacterized protein LOC107433374 [Ziziphus jujuba]		5.12784	16.2151	19.576	8.49361	11.8308	10.7233	17.8875	14.716	1.04904	0.972869	2.02846
Liquidambar_formosana_newGene_10039	0.659895	turquoise	#N/A		1.4985	0.91788	0.697392	0.552748	2.02432	1.62663	1.89173	1.99749	0	0.150284	0.604889
EVM0000223	0.73845	turquoise	#N/A		0.869263	0.993613	2.3163	1.25277	1.96634	1.86699	1.83524	2.00652	0.427475	0.364121	0.416606
Liquidambar_formosana_newGene_3471	0.830308	turquoise	#N/A		0.405837	0.680441	0.416283	0.88705	0.490356	0.679457	0.525085	0.761373	0.196413	0.136609	0.238155
Liquidambar_formosana_newGene_3470	0.883052	turquoise	#N/A		6.12667	6.58436	4.76316	7.95126	4.81085	5.28002	5.4419	5.51692	1.40269	1.55079	2.3215
EVM0002687	0.704665	turquoise	PREDICTED: LOW QUALITY PROTEIN: TPR repeat-containing protein ZIP4 [Vitis vinifera]		1.93277	2.51154	2.3616	2.04155	1.522	1.7757	1.07449	0.795741	0.120592	0.0893557	0.564447
Liquidambar_formosana_newGene_8749	0.678506	turquoise	PREDICTED: uncharacterized protein LOC108985893 [Juglans regia]		1.25312	2.72119	0.8889	3.88125	1.15833	1.5442	1.48623	1.5996	0.306536	0.337046	0.879146
Liquidambar_formosana_newGene_8744	0.738359	turquoise	#N/A		1.39999	3.41886	5.10431	6.66449	5.25644	3.59883	3.65993	4.41299	0.555474	0.19842	0.161338
EVM0016700	0.699144	turquoise	hypothetical protein VITISV_026134 [Vitis vinifera]		18.2584	16.9712	23.4149	21.0447	20.9059	20.538	16.8667	14.4844	6.21976	14.6731	8.72203
EVM0026805	0.750002	turquoise	PREDICTED: proteinaceous RNase P 2 [Vitis vinifera]		11.3645	13.5506	15.8123	7.59932	9.16677	16.0885	9.18083	7.99527	2.45296	4.30729	4.13423
Liquidambar_formosana_newGene_274	0.904069	turquoise	#N/A		2.54429	2.61978	2.2064	3.24768	2.74862	2.57569	2.81718	3.16837	0.765382	0.886039	1.80093
Liquidambar_formosana_newGene_273	0.893732	turquoise	#N/A		3.47474	5.31372	4.0326	6.24288	5.52279	5.38249	5.46234	6.89855	1.0411	1.59677	2.38112
EVM0026372	0.881244	turquoise	protein ABHD17B-like isoform X1 [Hevea brasiliensis]		22.526	21.9652	18.1386	24.1087	25.8508	26.8539	22.0669	20.6172	8.25765	12.3648	10.5577
EVM0013114	0.78122	turquoise	PREDICTED: protein downstream neighbor of Son [Vitis vinifera]		17.5169	22.4555	20.4934	17.1591	16.7818	18.8948	14.7467	14.0822	5.02732	9.35145	10.8931
EVM0025777	0.819552	turquoise	pumilio homolog 12 [Citrus clementina]		7.38971	8.07138	9.85154	3.51219	8.73855	15.3586	9.86454	6.7776	0.0878097	2.4751	1.63928
EVM0025779	0.573077	turquoise	enolase 1, chloroplastic [Jatropha curcas]		47.567	74.9378	63.5069	51.3867	49.9858	64.7374	28.6804	20.5314	5.18625	42.2264	20.6332
[truncated: 17,513 more rows]

## Sheet: hub genes
GeneID	Annotation	ModuleColor	NEC	EC	PEM1	PEM2	GE	HE	TE	CE	L	R	S
EVM0027895	IDD14	lightcyan	19.3974	0.68749	1.37337	0.585542	0.301425	0.466564	1.31551	0.922754	0.0798323	1.947	1.98628
EVM0026438	IAA29	lightcyan	35.4724	0.0744597	1.94269	0	0.268993	0.533659	0.414956	1.92213	10.6725	6.41632	4.44253
EVM0023968	DOF5.6	lightcyan	50.3078	0.0582173	0.586915	0.0620667	0.614144	0.708606	0.875882	1.57673	1.64018	1.1258	4.4603
EVM0022118	DOF5.3	lightcyan	50.3166	1.01317	4.36111	3.27127	2.61831	6.08268	7.351	5.26394	1.43159	5.36076	7.95444
EVM0022066	AUX22	lightcyan	86.4687	8.49411	8.85328	0.565785	7.16845	6.94924	5.48771	11.6261	0.931103	3.06829	7.64638
EVM0020589	LBD4	lightcyan	64.4749	2.82299	4.24073	6.4285	0.0251803	0.144501	0.0504267	0.300185	0.102576	2.05772	9.96317
EVM0017058	HLS1	lightcyan	129.558	10.2281	19.4024	2.73078	0.849537	1.10302	1.59792	1.64482	0.423551	4.28963	3.81405
EVM0012353	bHLH106	lightcyan	75.0667	3.54818	3.28066	2.47986	6.43902	12.4785	11.6516	15.6106	3.60832	7.99918	12.4399
EVM0010377	ERF003	lightcyan	63.0502	2.48956	3.00953	0.69906	0.392442	0.150643	3.66091	1.16013	0.376706	2.15615	1.5652
EVM0009101	IAA29	lightcyan	206.886	4.95975	5.14655	0.814917	2.56046	3.79335	8.20003	14.8276	4.7103	0.473655	1.37615
EVM0007410	NAC071	lightcyan	26.7559	0.420004	2.77864	0.093413	0.493434	0.64195	0.827098	0.716641	1.85069	1.95896	3.22854
EVM0001796	LOC104877974	lightcyan	18.086	0.841521	0.901657	0.319893	3.9676	3.06634	2.08383	1.48686	1.99162	1.6461	2.55571
Liquidambar_formosana_newGene_4920	DUF4283 domain-containing protein [Cephalotus follicularis]	lightcyan	2.04678	0.082492	0.082595	0.147658	0.0354733	0.0544753	0.0326153	0.0707393	0	0.052157	0.169548
EVM0010929	EVM0010929	lightcyan	39.8121	0.18403	1.43086	0.4982	2.80828	0.283254	0.36474	0.122581	3.01167	0.617429	1.68934
EVM0023968	DOF5.6	lightcyan	50.3078	0.0582173	0.586915	0.0620667	0.614144	0.708606	0.875882	1.57673	1.64018	1.1258	4.4603
EVM0009101	IAA29	lightcyan	206.886	4.95975	5.14655	0.814917	2.56046	3.79335	8.20003	14.8276	4.7103	0.473655	1.37615
EVM0027736	NPF4.3	lightcyan	10.3975	0.200829	0.260722	0.085562	0.318489	0.192442	0.885684	0.609512	0.110877	1.72373	0.431041
EVM0006060	CKX1	lightcyan	71.6435	2.67341	3.61307	2.07574	6.16793	3.73394	4.51909	3.81062	0.702164	2.12017	1.80354
EVM0015096	At5g48800	lightcyan	29.7323	1.82837	2.53258	1.11902	0.694039	0.7325	0.80276	0.831682	0.747901	2.2008	5.65355
EVM0005528	EVM0005528	lightcyan	148.072	1.08463	0.988107	0.581587	3.04049	2.97037	2.59196	1.06973	0.055653	14.5694	0.920729
EVM0023734	BAT1	lightcyan	68.2927	0.033676	0.457995	0.083975	0	0	0	0	0	3.8956	3.9645
EVM0017440	CASP-like protein 1E1	thistle	0.37692	34.9816	4.52379	18.5579	6.43471	6.46559	3.1103	2.22588	0.277831	0.038794	0.382299
Liquidambar_formosana_newGene_2694	FKBP43	thistle	0.0482537	5.54355	1.19243	3.27343	0.658318	0.27894	0.343678	0.149835	0.0226553	0.0148817	0.008331
EVM0013624	WOX9	thistle	0.43002	42.2378	9.77922	34.577	3.52758	1.96979	3.56444	0.926329	0.0566833	0	1.54367
EVM0017440	CASP-like protein 1E1	thistle	0.37692	34.9816	4.52379	18.5579	6.43471	6.46559	3.1103	2.22588	0.277831	0.038794	0.382299
EVM0018597	INV1	thistle	0.0879517	5.21161	2.64909	1.73053	0.988649	0.297913	0.425208	0.0629677	0.209705	0.958196	2.07118
EVM0000540	At5g45910	thistle	0	5.43678	2.02742	4.29148	0.844519	1.6688	0.502017	0.425007	0	0.0279843	1.11121
EVM0013309	NFYB9	thistle	1.06691	49.2261	31.1879	29.4899	16.3328	6.79367	3.75229	1.23574	0	0	0.0219643
EVM0024544	WAT1-related protein At1g68170-like	thistle	0.096448	12.5616	4.22812	0.839485	13.1314	9.41553	4.34733	4.86366	0.050654	0.0376633	0.534047
EVM0013624	WOX9	thistle	0.43002	42.2378	9.77922	34.577	3.52758	1.96979	3.56444	0.926329	0.0566833	0	1.54367
EVM0013309	NFYB9	thistle	1.06691	49.2261	31.1879	29.4899	16.3328	6.79367	3.75229	1.23574	0	0	0.0219643
EVM0013106	BBM2	thistle	32.4361	204.586	106.864	90.6374	71.4421	63.196	67.0972	38.0659	0.05051	1.83248	0.255299
EVM0021733	MIK2	thistle	0.0734393	8.65886	5.47302	6.34717	4.24795	4.57539	2.27186	2.3697	0.0144607	0.013275	0
EVM0026553	ARF5	thistle	49.11	150.765	110.327	152.1	74.934	89.9562	60.888	34.1917	4.91634	40.3694	38.0816
EVM0015487	MYB36	thistle	8.71946	60.3548	45.5172	38.8915	27.7403	15.0135	11.2438	7.29007	0.423252	7.16466	0.521945
EVM0000811	HMGB9	thistle	0.17304	13.5694	5.17812	15.751	9.63833	7.66262	4.01092	3.28373	2.6626	0.346056	3.20243
EVM0000259	ESR2	thistle	0.104639	6.77823	0.386974	7.18133	2.0266	5.5547	3.14852	1.00463	0	0	0.251682
EVM0009797	FRS2	thistle	4.64157	12.6027	10.523	7.33678	11.8322	11.6546	10.0234	10.6802	2.93066	6.03231	7.06043
EVM0013106	BBM1	thistle	32.4361	204.586	106.864	90.6374	71.4421	63.196	67.0972	38.0659	0.05051	1.83248	0.255299
EVM0014412	WOX11	blue	0.28288	18.4571	63.1044	36.8356	28.839	26.8853	77.5581	47.9286	0	0.952421	0.114734
EVM0027321	RLK-Pelle_LRK10L-2	blue	0.727884	1.50826	15.9507	2.20918	3.35697	1.96982	4.31762	1.33795	0.447166	0.169553	0.14346
EVM0024773	MYB15	blue	0	0.687617	43.3602	6.83356	0.406391	0.1143	0.221184	0.0498247	0.269549	7.92667	1.75587
EVM0024772	RLK-Pelle_DLSV	blue	0.902744	0.097728	2.33528	0.037989	0.36187	0.137055	0.0266207	0.233456	0	0.165095	0.041148
EVM0019908	WRKY50	blue	5.29291	3.97758	24.6828	3.32277	3.5087	7.17123	4.84272	15.0612	2.82066	7.93047	2.66536
EVM0019887	CRK10	blue	8.48956	4.30813	45.6519	2.5057	5.57568	4.61593	2.17833	6.56368	0.739037	0.360146	0.144325
EVM0018729	LECRK2	blue	1.54979	5.22049	15.2213	2.7756	0.986718	1.46934	1.88139	1.12022	0.65318	0.760818	1.39089
EVM0018040	LECRKS5	blue	4.8809	6.85115	33.3401	6.83393	16.5008	13.4744	4.38011	3.365	3.02524	6.44263	2.32106
EVM0017221	MIK2	blue	0.179584	0.842016	6.2704	1.15566	0.130757	0.604972	0.220253	0.742295	0.318762	0.533547	0.328523
EVM0006581	RLK-Pelle_DLSV	blue	16.5435	20.2002	94.3905	13.107	20.0371	9.44986	4.46754	3.60855	1.92558	12.5759	1.30528
EVM0006539	STE_STE11	blue	0.47713	0.444277	2.46857	0.8314	1.06602	0.581468	1.04352	0.793668	0.547411	0.643333	0.328902
EVM0023055	HIPP24	blue	0.0985083	0.113442	19.7773	0	2.15725	1.74697	2.15658	2.80745	2.80599	1.11963	0.409132
EVM0013841	GOLS1	blue	0.26519	0.44274	22.5483	0.285656	0.711806	0.70371	0.478432	0.44691	0.717629	0.497188	0.420663
Liquidambar_formosana_newGene_8807	Liquidambar_formosana_newGene_8807	blue	0.393757	0.361371	3.27508	0.555028	0.293372	0.462562	0.257667	0.314683	0.178094	0.381991	0.296253
EVM0028768	ATL45	blue	0.027435	1.22268	11.7118	2.3618	1.33443	0.96497	0.654289	0.715882	0.236894	0.913548	0.524588
EVM0002428	EVM0002428	blue	0.369097	0.208009	7.55343	0.0428853	0.0485147	0.306042	0.020728	0.0844493	0.009093	0.0929987	0.00894533
EVM0001107	UGT87A1	blue	3.63335	7.08501	33.482	7.92978	4.53717	3.5532	1.04101	0.630647	0.170543	3.44165	0.1634
EVM0022805	EVM0022805	blue	0.139775	0.151251	3.45258	0.165656	0.0725013	0.0414937	0.0260583	0.0329773	0.0507967	0.0887193	0.103866
EVM0019887	CRK10	blue	8.48956	4.30813	45.6519	2.5057	5.57568	4.61593	2.17833	6.56368	0.739037	0.360146	0.144325
EVM0022613	SEN1	blue	0.279142	0.443698	2.71867	0.066222	0.493784	1.69118	0.284842	1.20705	0.121406	0.390454	0.369637
Liquidambar_formosana_newGene_1826	Liquidambar_formosana_newGene_1826	blue	1.45348	0.410532	3.92082	0.0241973	0.302238	0.86219	0.0524683	0.369754	0.481075	0.278761	0.32439
EVM0023481	ZHD9	pink	1.93337	7.71238	8.39171	6.97626	28.4815	42.4585	45.1503	47.541	12.77	1.60391	13.6886
EVM0001536	PLATZ	pink	9.15361	21.1185	10.5514	19.6874	49.2411	62.5974	82.4076	66.1035	12.7347	27.0308	13.1084
EVM0020419	HMGB14	pink	29.4665	35.1539	21.3477	29.989	49.3317	73.2835	72.7661	78.7778	41.0026	45.4206	41.4351
EVM0005120	GRF8	pink	0.86856	3.40545	2.27181	4.31875	7.43763	12.9216	21.2164	21.2578	1.18913	1.34522	1.70178
EVM0005293	probable "serine threonine-protein" kinase	pink	16.3868	23.0053	21.8061	17.6592	37.5455	35.948	31.2508	26.9393	21.2523	18.0124	23.7438
EVM0008511	ZC3H2	pink	4.9984	23.2612	8.07837	2.54965	72.3488	72.2734	116.538	142.151	0.148718	0.0454667	0.134093
EVM0003535	CDF3	pink	2.54311	3.2575	3.48863	2.06793	10.9937	11.6802	21.6066	21.4853	1.38316	0.699575	1.07701
EVM0003139	DPBF2	pink	0.0331527	3.17698	2.77765	0.434462	8.49444	6.04189	9.3623	8.71837	0.0158077	0.0278983	0.332381
EVM0000309	PIF1	pink	0.287509	4.49843	1.6458	1.78137	8.31836	10.6941	13.1285	14.1553	3.17793	0.546735	3.20753
EVM0011785	ERF5	pink	50.4671	33.7918	37.4593	20.6061	132.71	120.044	138.078	123.935	17.6491	12.0766	39.8024
EVM0000511	DREB2G	pink	0.0970487	112.983	11.5574	5.18929	114.492	158.73	130.472	103.298	0.238678	0.770147	0.15301
EVM0007351	SMR4	pink	0.292147	3.4661	3.7271	3.30181	17.7219	9.65636	12.0642	18.3985	2.51886	0.288064	0
EVM0002847	SBP65	pink	0.194375	25.9876	14.9537	3.51647	69.536	72.7672	87.8602	85.1546	0.0957537	0.017364	0.19672
EVM0010468	EVM0010468	pink	0.342448	64.6706	12.1493	9.19311	192.381	163.925	185.032	150.702	11.1513	1.67539	3.56721
EVM0026958	SBP65	pink	0.672562	236.719	88.3231	29.5032	601.484	665.974	758.322	687.375	0.568249	0.0694583	1.1544
EVM0017785	EVM0017785	pink	1.12578	1.39921	2.33828	0.381034	16.406	10.1296	7.52641	1.7121	0.34302	0.0948277	0
EVM0002478	EVM0002478	pink	0.258171	30.1903	8.90372	10.1616	72.0841	60.6189	83.8615	123.503	0.0450593	0	0.061757
EVM0000925	LEA6	pink	0.0927387	109.378	18.0002	22.3839	179.67	184.011	166.731	194.822	0	0	0
EVM0005000	EVM0005000	pink	0.365201	85.4405	38.4041	14.2717	237.772	192.557	174.941	190.496	0.418869	0	0.0735297
EVM0018667	LIP1	pink	11.5378	50.4687	43.1891	20.2539	127.674	111.911	102.526	88.8121	50.3904	35.591	61.3223
EVM0025234	EVM0025234	pink	0.360823	253.156	72.0481	49.3053	509.347	464.22	453.495	589.21	12.1268	0.638151	1.27044
EVM0009558	EVM0009558	pink	16.8014	63.5241	31.8444	7.22135	89.4454	98.7362	111.927	90.7549	26.0162	12.5175	36.3899
EVM0004835	EVM0004835	pink	2.20573	118.979	77.7003	4.65115	193.65	203.476	127.869	100.004	55.6325	5.48381	30.9774

## Sheet: thistle in BiNGO
adjustedPValue_EC	description_EC	N_EC	nn_EC	pValue_EC	X_EC	xx_EC
0.40805	organophosphate metabolic process	13926	133	0.21232	90	2
0.028093	glycerol-3-phosphate metabolic process	13926	9	0.0014438	90	2
0.033885	biological regulation	13926	2640	0.001814	90	29
0.00091876	regulation of biological process	13926	2079	2.7543e-05	90	29
0.99946	metabolic process	13926	9738	0.99732	90	51
0.75262	primary metabolic process	13926	7015	0.65109	90	44
0.72526	cellular metabolic process	13926	7234	0.60485	90	46
0.72526	cellular nitrogen compound metabolic process	13926	2090	0.60497	90	13
1.508e-05	regulation of metabolic process	13926	1261	2.3847e-07	90	25
0.72526	small molecule metabolic process	13926	2093	0.60716	90	13
0.93619	cellular amino acid and derivative metabolic process	13926	839	0.91414	90	3
0.64576	cellular nitrogen compound biosynthetic process	13926	393	0.46876	90	3
0.52376	amine biosynthetic process	13926	181	0.327	90	2
0.66817	oxoacid metabolic process	13926	724	0.50526	90	5
0.66817	carboxylic acid metabolic process	13926	724	0.50526	90	5
0.0024661	regulation of cellular process	13926	1864	8.4493e-05	90	26
0.53307	phosphate metabolic process	13926	1908	0.3478	90	14
0.68196	small molecule biosynthetic process	13926	913	0.54366	90	6
0.48929	cellular carbohydrate metabolic process	13926	555	0.28911	90	5
0.2709	cellular carbohydrate catabolic process	13926	177	0.10685	90	3
0.35354	small molecule catabolic process	13926	222	0.17337	90	3
0.074488	alcohol catabolic process	13926	80	0.014993	90	3
0.0024274	developmental process	13926	834	7.7966e-05	90	16
0.020342	reproductive developmental process	13926	312	0.00091475	90	8
0.66817	organic acid metabolic process	13926	725	0.50649	90	5
0.36989	organic acid biosynthetic process	13926	346	0.18534	90	4
0.81616	cellular biosynthetic process	13926	2434	0.72642	90	14
0.53307	phosphorus metabolic process	13926	1910	0.34929	90	14
0.75059	cellular amino acid metabolic process	13926	339	0.64773	90	2
2.4578e-05	regulation of macromolecule biosynthetic process	13926	955	5.2629e-07	90	21
1.4109e-05	regulation of transcription	13926	872	1.156e-07	90	21
0.87378	biosynthetic process	13926	2613	0.81952	90	14
0.67033	cellular process	13926	9380	0.51598	90	61
0.60058	carbohydrate metabolic process	13926	951	0.41796	90	7
0.48929	carbohydrate catabolic process	13926	291	0.29058	90	3
0.053303	alditol metabolic process	13926	15	0.0041061	90	2
0.053303	glycerol metabolic process	13926	15	0.0041061	90	2
0.02547	anatomical structure development	13926	577	0.0011999	90	11
0.039115	reproductive structure development	13926	279	0.0021777	90	7
0.87404	amine metabolic process	13926	480	0.82164	90	2
0.81616	catabolic process	13926	1278	0.73052	90	7
0.043593	alditol catabolic process	13926	12	0.0026137	90	2
0.80141	cellular amine metabolic process	13926	380	0.70874	90	2
0.053303	branched chain family amino acid biosynthetic process	13926	16	0.004673	90	2
0.0063759	leucine biosynthetic process	13926	4	0.00024575	90	2
0.043593	glycerol catabolic process	13926	12	0.0026137	90	2
1.4109e-05	regulation of macromolecule metabolic process	13926	1089	6.224e-08	90	24
0.053303	reproduction	13926	417	0.0055084	90	8
0.053303	reproductive process	13926	406	0.0047016	90	8
1.4109e-05	regulation of RNA metabolic process	13926	886	1.512e-07	90	21
1.4109e-05	regulation of transcription, DNA-dependent	13926	865	1.0086e-07	90	21
3.8914e-05	regulation of cellular metabolic process	13926	1178	1.0832e-06	90	23
2.7351e-05	regulation of cellular biosynthetic process	13926	971	6.9108e-07	90	21
0.066991	branched chain family amino acid metabolic process	13926	26	0.012137	90	2
1	biological_process	13926	13926	1	90	90
1.4109e-05	regulation of nucleobase, nucleoside, nucleotide and nucleic acid metabolic process	13926	969	1.516e-07	90	22
0.014225	glycerol-3-phosphate catabolic process	13926	6	0.00060922	90	2
0.79402	nitrogen compound metabolic process	13926	2221	0.69548	90	13
0.028093	leucine metabolic process	13926	9	0.0014438	90	2
0.67033	cellular ketone metabolic process	13926	739	0.52367	90	5
0.55692	alcohol metabolic process	13926	337	0.37208	90	3
0.47962	cellular amino acid biosynthetic process	13926	160	0.27685	90	2
0.053303	polyol catabolic process	13926	14	0.0035736	90	2
1.4109e-05	regulation of nitrogen compound metabolic process	13926	979	1.8127e-07	90	22
0.36989	carboxylic acid biosynthetic process	13926	346	0.18534	90	4
0.0098601	multicellular organismal process	13926	865	0.00040116	90	15
2.0774e-05	regulation of gene expression	13926	1025	4.0036e-07	90	22
2.7351e-05	regulation of biosynthetic process	13926	972	7.0281e-07	90	21
0.066991	polyol metabolic process	13926	27	0.013054	90	2
0.0024666	multicellular organismal development	13926	754	8.9792e-05	90	15
1.508e-05	regulation of primary metabolic process	13926	1086	2.5833e-07	90	23

## Sheet: blue in BiNGO
adjustedPValue_ early SE	description_ early SE	N_ early SE	nn_ early SE	pValue_ early SE	X_ early SE	xx_ early SE
0.00042	phosphorus metabolic process	13926	1910	5.76e-07	1070	202
0.00042	phosphate metabolic process	13926	1908	5.34e-07	1070	202
0.00352	phosphorylation	13926	1660	7.24e-06	1070	174
0.00431	protein amino acid phosphorylation	13926	1103	1.18e-05	1070	123
0.0358	aminoglycan catabolic process	13926	54	0.000172	1070	13
0.0358	chitin catabolic process	13926	54	0.000172	1070	13
0.0358	chitin metabolic process	13926	54	0.000172	1070	13
0.037	aminoglycan metabolic process	13926	62	0.000203	1070	14
0.182	protein modification process	13926	1902	0.00225	1070	178
0.373	post-translational protein modification	13926	1734	0.00845	1070	159
0.45	macromolecule modification	13926	2027	0.0111	1070	182
0.683	polysaccharide catabolic process	13926	185	0.0268	1070	22
0.723	polysaccharide metabolic process	13926	366	0.0352	1070	38
0.778	carbohydrate metabolic process	13926	951	0.0768	1070	85
0.924	catabolic process	13926	1278	0.242	1070	105
0.95	amine metabolic process	13926	480	0.381	1070	39
0.95	carbohydrate catabolic process	13926	291	0.309	1070	25
1	metabolic process	13926	9738	0.655	1070	743
1	macromolecule metabolic process	13926	4935	0.993	1070	343
1	cellular macromolecule metabolic process	13926	4383	0.997	1070	297
1	cellular protein metabolic process	13926	2931	0.725	1070	218
1	macromolecule catabolic process	13926	707	0.54	1070	54
1	primary metabolic process	13926	7015	0.981	1070	507
1	protein metabolic process	13926	3355	0.925	1070	239
1	cellular metabolic process	13926	7234	0.922	1070	534
1	biological_process	13926	13926	1	1070	1070
1	cellular process	13926	9380	0.996	1070	682
1	nitrogen compound metabolic process	13926	2221	1	1070	131

## Sheet: pink in BiNGO
adjustedPValue_SEs	description_SEs	N_SEs	nn_SEs	pValue_SEs	X_SEs	xx_SEs
3.01e-08	RNA metabolic process	13926	949	2.58e-11	482	74
3.01e-08	rRNA metabolic process	13926	165	8.65e-11	482	26
3.01e-08	ribosome biogenesis	13926	260	1.01e-10	482	33
3.01e-08	rRNA processing	13926	162	5.68e-11	482	26
3.18e-08	ribonucleoprotein complex biogenesis	13926	324	1.6e-10	482	37
3.18e-08	RNA processing	13926	483	1.34e-10	482	47
6.83e-08	gene expression	13926	1360	4e-10	482	91
1.23e-07	ncRNA processing	13926	252	8.27e-10	482	31
4.58e-07	response to cold	13926	31	3.45e-09	482	11
1.7e-05	ncRNA metabolic process	13926	313	1.42e-07	482	31
0.000125	cellular component biogenesis	13926	727	1.15e-06	482	51
0.00183	nucleic acid metabolic process	13926	1434	1.84e-05	482	79
0.00191	response to temperature stimulus	13926	81	2.08e-05	482	12
0.00192	flavonoid biosynthetic process	13926	252	2.25e-05	482	23
0.00208	toxin catabolic process	13926	47	2.79e-05	482	9
0.00208	toxin metabolic process	13926	47	2.79e-05	482	9
0.00234	maturation of SSU-rRNA	13926	48	3.33e-05	482	9
0.00276	transition metal ion transport	13926	61	4.15e-05	482	10
0.00353	maturation of SSU-rRNA from tricistronic rRNA transcript (SSU-rRNA, 5.8S rRNA, LSU-rRNA)	13926	40	5.63e-05	482	8
0.00353	flavonoid metabolic process	13926	268	5.91e-05	482	23
0.00454	cofactor metabolic process	13926	329	7.98e-05	482	26
0.00491	response to abiotic stimulus	13926	409	9.04e-05	482	30
0.00577	ribosomal large subunit biogenesis	13926	44	0.000115	482	8
0.00577	glutathione metabolic process	13926	82	0.000116	482	11
0.00695	cellular amino acid derivative metabolic process	13926	543	0.000145	482	36
0.0149	response to stress	13926	1107	0.000324	482	60
0.0157	nucleobase, nucleoside, nucleotide and nucleic acid metabolic process	13926	1715	0.000354	482	85
0.0233	coenzyme metabolic process	13926	254	0.000546	482	20
0.0258	peptide metabolic process	13926	115	0.000627	482	12
0.0286	RNA methylation	13926	44	0.000719	482	7
0.0365	secondary metabolic process	13926	578	0.000946	482	35
0.0386	response to very low fluence red light stimulus	13926	2	0.0012	482	2
0.0386	cellular response to red light	13926	2	0.0012	482	2
0.0386	red light signaling pathway	13926	2	0.0012	482	2
0.0386	phenylpropanoid biosynthetic process	13926	328	0.00108	482	23
0.0386	seed oilbody biogenesis	13926	2	0.0012	482	2
0.0386	response to continuous far red light stimulus by the high-irradiance response system	13926	2	0.0012	482	2
0.0465	mitochondrion organization	13926	94	0.00151	482	10
0.0465	protein targeting to mitochondrion	13926	37	0.00156	482	6
0.0465	protein localization in mitochondrion	13926	37	0.00156	482	6
0.0528	cellular amino acid derivative biosynthetic process	13926	386	0.00203	482	25
0.0528	response to far red light	13926	8	0.00203	482	3
0.0654	response to very low light intensity stimulus	13926	3	0.0035	482	2
0.077	mitochondrial transport	13926	45	0.00432	482	6
0.0851	aromatic compound biosynthetic process	13926	436	0.00505	482	26
0.0856	sulfur metabolic process	13926	245	0.00516	482	17
0.0869	phenylpropanoid metabolic process	13926	372	0.00531	482	23
0.0954	macromolecule methylation	13926	116	0.00695	482	10
0.135	cellular nitrogen compound metabolic process	13926	2090	0.0107	482	91
0.135	macromolecule localization	13926	486	0.0107	482	27
0.178	response to stimulus	13926	1808	0.0161	482	79
0.235	response to red or far red light	13926	47	0.0226	482	5
0.249	metal ion transport	13926	268	0.0244	482	16
0.249	protein localization in organelle	13926	121	0.0246	482	9
0.254	nitrogen compound metabolic process	13926	2221	0.026	482	93
0.256	response to red light	13926	9	0.0366	482	2
0.298	RNA modification	13926	114	0.0442	482	8
0.31	response to light intensity	13926	24	0.0487	482	3
0.332	post-embryonic development	13926	359	0.0744	482	18
0.34	cellular amino acid and derivative metabolic process	13926	839	0.0766	482	37
0.371	cellular biosynthetic process	13926	2434	0.0863	482	96
0.376	cellular aromatic compound metabolic process	13926	619	0.0895	482	28
0.376	red or far-red light signaling pathway	13926	15	0.0933	482	2
0.376	protein import	13926	112	0.0937	482	7
0.376	cellular response to red or far red light	13926	15	0.0933	482	2
0.418	protein transport	13926	357	0.115	482	17
0.418	establishment of protein localization	13926	357	0.115	482	17
0.421	biosynthetic process	13926	2613	0.117	482	101
0.427	protein localization	13926	386	0.123	482	18
0.442	developmental process	13926	834	0.136	482	35
0.47	response to light stimulus	13926	151	0.153	482	8
0.484	cellular macromolecule localization	13926	329	0.169	482	15
0.511	cation transport	13926	390	0.196	482	17
0.528	protein targeting	13926	163	0.204	482	8
0.536	intracellular protein transport	13926	294	0.22	482	13
0.536	cellular protein localization	13926	320	0.22	482	14
0.564	localization	13926	2037	0.253	482	76
0.568	response to radiation	13926	174	0.256	482	8
0.582	cellular response to light stimulus	13926	29	0.266	482	2
0.597	small molecule biosynthetic process	13926	913	0.287	482	35
0.602	multicellular organismal process	13926	865	0.304	482	33
0.602	multicellular organismal development	13926	754	0.304	482	29
0.602	seed development	13926	158	0.307	482	7
0.613	cellular response to radiation	13926	33	0.317	482	2
0.625	fruit development	13926	162	0.329	482	7
0.625	small molecule metabolic process	13926	2093	0.341	482	76
0.625	intracellular transport	13926	409	0.343	482	16
0.644	cellular localization	13926	524	0.358	482	20
0.667	transport	13926	1979	0.39	482	71
0.696	establishment of localization	13926	1994	0.417	482	71
0.697	cellular response to abiotic stimulus	13926	41	0.417	482	2
0.749	ion transport	13926	531	0.474	482	19
0.794	organelle organization	13926	723	0.532	482	25
0.8	cellular component organization	13926	1104	0.54	482	38
0.805	reproductive process	13926	406	0.545	482	14
0.827	establishment of localization in cell	13926	476	0.585	482	16
0.827	reproduction	13926	417	0.585	482	14
0.864	methylation	13926	340	0.634	482	11
0.864	reproductive structure development	13926	279	0.633	482	9
0.92	one-carbon metabolic process	13926	360	0.706	482	11
0.92	anatomical structure development	13926	577	0.71	482	18
0.922	reproductive cellular process	13926	106	0.715	482	3
0.933	cellular macromolecule metabolic process	13926	4383	0.731	482	146
0.951	reproductive developmental process	13926	312	0.757	482	9
0.956	cellular catabolic process	13926	884	0.779	482	27
0.96	cellular process	13926	9380	0.791	482	317
0.99	primary metabolic process	13926	7015	0.853	482	232
0.993	cellular response to stimulus	13926	680	0.862	482	19
1	biological_process	13926	13926	1	482	482
1	cellular metabolic process	13926	7234	0.916	482	236
1	metabolic process	13926	9738	0.897	482	325
1	signaling	13926	725	0.995	482	14
1	catabolic process	13926	1278	0.993	482	30
1	macromolecule metabolic process	13926	4935	0.963	482	153
1	signaling pathway	13926	535	0.962	482	12
1	macromolecule modification	13926	2027	0.999	482	48

## Sheet: lightcyan in BiNGO
adjustedPValue_NEC	description_NEC	N_NEC	nn_NEC	pValue_NEC	X_NEC	xx_NEC
0.0012869	cellular polysaccharide catabolic process	13926	72	8.5727e-06	200	8
0.00095525	pectin catabolic process	13926	58	1.6301e-06	200	8
0.035626	cell wall organization	13926	300	0.0013375	200	12
0.035626	plant-type cell wall organization	13926	114	0.0012781	200	7
0.32406	multicellular organismal development	13926	754	0.07648	200	16
0.041745	system development	13926	314	0.0019625	200	12
0.97773	macromolecule metabolic process	13926	4935	0.82857	200	65
0.13797	macromolecule catabolic process	13926	707	0.013303	200	18
0.032145	response to chemical stimulus	13926	891	0.00099769	200	25
0.061443	cellular response to chemical stimulus	13926	381	0.0034601	200	13
0.43366	biological regulation	13926	2640	0.11704	200	45
0.59391	regulation of biological process	13926	2079	0.23006	200	34
0.97773	metabolic process	13926	9738	0.79801	200	135
0.97773	primary metabolic process	13926	7015	0.81322	200	95
1	cellular metabolic process	13926	7234	0.90965	200	95
1	cellular nitrogen compound metabolic process	13926	2090	0.97549	200	21
0.83733	regulation of metabolic process	13926	1261	0.44849	200	19
0.51164	response to stimulus	13926	1808	0.16764	200	31
0.0095088	response to endogenous stimulus	13926	396	0.00019382	200	16
0.087536	cellular response to hormone stimulus	13926	148	0.005527	200	7
0.0095088	cellular response to auxin stimulus	13926	59	0.00019472	200	6
1	biological_process	13926	13926	1	200	200
0.61478	signaling	13926	725	0.24339	200	13
0.99866	small molecule metabolic process	13926	2093	0.86744	200	25
0.96737	cellular amino acid and derivative metabolic process	13926	839	0.77196	200	10
1	oxoacid metabolic process	13926	724	0.9805	200	5
1	carboxylic acid metabolic process	13926	724	0.9805	200	5
1	cellular biosynthetic process	13926	2434	0.92222	200	28
0.71791	cellular amino acid derivative biosynthetic process	13926	386	0.31923	200	7
0.10262	cellular alkene metabolic process	13926	10	0.0085608	200	2
0.10262	alkene biosynthetic process	13926	10	0.0085608	200	2
0.0035431	xylem and phloem pattern formation	13926	27	3.6277e-05	200	5
0.0095088	cotyledon vascular tissue pattern formation	13926	8	0.00015496	200	3
0.99252	small molecule biosynthetic process	13926	913	0.85215	200	10
0.43366	regulation of cellular process	13926	1864	0.11708	200	33
0.13797	cellular carbohydrate metabolic process	13926	555	0.014147	200	15
0.032145	cellular carbohydrate catabolic process	13926	177	0.0010423	200	9
0.1692	regulation of lipid metabolic process	13926	15	0.019057	200	2
0.035401	regulation of isoprenoid metabolic process	13926	4	0.0012082	200	2
0.69132	regulation of primary metabolic process	13926	1086	0.29722	200	18
0.94854	cellular amino acid metabolic process	13926	339	0.72143	200	4
0.0017266	polysaccharide catabolic process	13926	185	1.4732e-05	200	12
0.10262	ethylene biosynthetic process	13926	10	0.0085608	200	2
0.041745	1-aminocyclopropane-1-carboxylate biosynthetic process	13926	5	0.0019946	200	2
0.030573	polysaccharide metabolic process	13926	366	0.00083477	200	14
0.99975	biosynthetic process	13926	2613	0.90245	200	31
0.49436	sulfur amino acid metabolic process	13926	49	0.15615	200	2
0.35784	methionine metabolic process	13926	35	0.089708	200	2
0.10262	ethylene metabolic process	13926	10	0.0085608	200	2
0.99881	cellular macromolecule metabolic process	13926	4383	0.87395	200	56
0.2567	signaling pathway	13926	535	0.04512	200	13
0.085989	hormone-mediated signaling pathway	13926	146	0.0051359	200	7
0.0078076	carbohydrate metabolic process	13926	951	9.3265e-05	200	29
0.01352	carbohydrate catabolic process	13926	291	0.00029993	200	13
1	cellular process	13926	9380	0.99496	200	118
0.094218	plant-type cell wall organization or biogenesis	13926	152	0.0063759	200	7
0.53651	cellular aromatic compound metabolic process	13926	619	0.18036	200	12
0.83063	aromatic compound biosynthetic process	13926	436	0.43658	200	7
0.053308	pattern specification process	13926	67	0.0027291	200	5
0.044371	cellular polysaccharide metabolic process	13926	236	0.0021958	200	10
0.72881	regulation of cellular metabolic process	13926	1178	0.33232	200	19
0.0095088	response to hormone stimulus	13926	385	0.00014055	200	16
0.018304	leaf vascular tissue pattern formation	13926	11	0.00044225	200	3
0.26832	tissue development	13926	137	0.04762	200	5
0.038865	phloem or xylem histogenesis	13926	35	0.0015254	200	4
0.018304	response to organic substance	13926	472	0.00046854	200	17
0.1899	cellular response to organic substance	13926	198	0.024321	200	7
0.52777	aspartate family amino acid metabolic process	13926	53	0.17652	200	2
0.040748	organ development	13926	309	0.0017164	200	12
0.90342	cellular amine metabolic process	13926	380	0.64064	200	5
0.0012869	pectin metabolic process	13926	72	8.5727e-06	200	8
0.97773	monocarboxylic acid metabolic process	13926	308	0.82283	200	3
0.10262	anatomical structure development	13926	577	0.0091064	200	16
0.10262	cellular response to endogenous stimulus	13926	159	0.0080903	200	7
1	organic acid metabolic process	13926	725	0.98069	200	5
0.99975	nitrogen compound metabolic process	13926	2221	0.89586	200	26
1	cellular ketone metabolic process	13926	739	0.95799	200	6
0.84136	sulfur metabolic process	13926	245	0.46915	200	4
0.14972	catabolic process	13926	1278	0.015841	200	28
0.040748	cell wall organization or biogenesis	13926	440	0.0017384	200	15
0.27457	developmental process	13926	834	0.054976	200	18
0.49436	amine metabolic process	13926	480	0.15369	200	10
0.041745	1-aminocyclopropane-1-carboxylate metabolic process	13926	5	0.0019946	200	2
0.85508	cellular amino acid derivative metabolic process	13926	543	0.52163	200	8
0.43366	multicellular organismal process	13926	865	0.11712	200	17
0.032145	regionalization	13926	54	0.0010384	200	5
0.30518	cellular response to stimulus	13926	680	0.065449	200	15
0.0012869	response to auxin stimulus	13926	147	8.7846e-06	200	11
0.0095088	auxin mediated signaling pathway	13926	59	0.00019472	200	6

## Sheet: Table legend
Supplementary Table 2: WGCNA analysis
Sheet 1: Related to Figure 5. The kME (module membership-measuring how correlated a gene is to the eigengene) of each gene in the 22 modules, totaling 19512 genes. The average FPKM of each gene from three biological replicates is shown. The expression values of 19512 genes served as inputs in the weighted correlation network analysis (WGCNA).
Sheet 2: Related to Figure 6. The data of hub genes in 4 tissue-specific modules. The numbers of hub genes are 21 lightcyan; 21 blue; 23 pink; 17 purple; 18 thistle.
Sheet 3-6: Related to Supplementary Figure 4. The data of GO enrichment analysis was performed for four module using Cytoscape (BiNGO plug-in)
