# Supplementary material for: Global Transcriptome and Coexpression Network Analyses Reveal New Insights Into Somatic Embryogenesis in Hybrid Sweetgum (Liquidambar styraciflua × Liquidambar formosana)
Source: Front Plant Sci. 2021 Nov 22;12:751866. doi: 10.3389/fpls.2021.751866 (PMC8645980; doi:10.3389/fpls.2021.751866)
Supplement: Supplementary file 4 [file Table_4.XLSX]

## Sheet:  Fig4A. 6815 DE genes
GeneID	Supercluster	Annotation	NEC	EC	PEM1	PEM2	GE	HE	TE	CE	L	R	S
EVM0012564	1	PREDICTED: serine--tRNA ligase	68.4181	45.0549	34.1707	34.4503	37.8409	53.9115	44.1439	41.9453	31.4633	36.7283	35.9213
EVM0023705	1	PREDICTED: pentatricopeptide repeat-containing protein At5g02860	10.7909	5.86836	5.55086	4.8388	4.75493	4.83906	4.48453	5.44913	2.49859	2.21647	3.32402
EVM0026364	1	elongation factor 2	221.616	127.901	82.8566	103.306	111.999	135.188	118.343	96.6979	70.2041	101.294	82.4304
EVM0027759	1	hypothetical protein CQW23_22831	21.5398	13.4832	6.15002	6.53481	9.14138	10.3985	12.1747	11.3569	6.57205	7.14264	7.46224
EVM0011360	1	PREDICTED: ethylene-responsive transcription factor RAP2-11	11.7476	6.39184	1.36798	1.20136	3.82883	3.90602	3.51385	1.75597	0.020769	3.73464	0.383872
EVM0002290	1	unnamed protein product, partial	21.2798	11.6859	3.84036	3.39402	11.9707	12.7066	2.72598	1.11032	0.100826	1.49459	0.240154
EVM0010368	1	Mem_trans domain-containing protein	100.518	52.1551	20.5131	34.471	23.7103	86.8017	34.6302	19.5457	0.247987	8.17962	18.189
EVM0020876	1	phosphoacetylglucosamine mutase isoform X1	22.8308	15.6154	10.9963	13.1567	12.3289	14.1828	15.018	13.8296	5.85701	9.90644	10.536
EVM0018905	1	PREDICTED: major allergen Pru ar 1	1265.99	693.301	772.267	335.001	500.893	394.727	510.615	622.763	38.2966	224.867	17.8742
EVM0008536	1	DUF4283 domain-containing protein	8.85081	5.08074	3.75775	3.06069	2.98976	3.97466	4.43534	3.53778	0.096046	1.09377	3.56929
EVM0014329	1	uncharacterized protein LOC110819513	16.2037	11.0568	3.18347	4.94576	6.36982	4.25158	7.99567	3.61751	0.0378137	2.06224	1.84635
EVM0008158	1	uncharacterized protein LOC111989356	7.48918	5.58439	3.4063	4.41835	4.15025	3.3954	5.85188	3.29309	0.153793	2.17111	1.80902
EVM0012087	1	uncharacterized protein LOC111988706	10.538	7.10866	5.09886	3.73503	4.75957	8.55241	5.56004	4.77186	1.78666	1.22832	2.16795
EVM0005007	1	serine decarboxylase-like	153.677	112.271	67.725	84.6131	95.7249	104.988	94.6494	102.575	54.7688	60.5137	79.3218
EVM0009250	1	wee1-like protein kinase isoform X1	8.5087	4.3613	2.87068	2.07121	3.08094	3.51985	2.85349	1.98494	0.0655507	0.422023	1.99385
EVM0001882	1	PREDICTED: 10 kDa chaperonin-like	153.928	131.31	88.6847	65.1673	78.835	116.613	96.1985	86.9785	37.2947	63.4438	41.8206
EVM0026961	1	flavonol synthase	21.757	10.8973	12.0381	8.31335	13.489	16.2323	6.12848	4.4904	0.605279	4.08482	0.178749
EVM0011756	1	PREDICTED: probable anion transporter 3, chloroplastic	32.1854	8.97229	13.374	19.8141	17.3501	32.4288	8.68341	5.96611	6.36195	13.989	6.36943
EVM0015345	1	protein NEN1-like	11.4886	9.03714	4.66623	4.24403	6.01391	5.22082	5.28434	5.60833	0.489702	2.6428	2.99405
EVM0003063	1	Polyketide cyclase/dehydrase	178.391	120.321	107.619	129.053	112.501	112.323	121.07	124.432	105.245	102.655	64.3695
EVM0026463	1	PREDICTED: ERBB-3 BINDING PROTEIN 1-like	25.6753	20.309	13.0103	15.552	15.95	18.3652	16.5284	14.9309	6.58293	9.53573	11.4165
EVM0021150	1	U1 small nuclear ribonucleoprotein C-like	22.0153	15.1524	8.85432	10.395	12.2432	17.0723	11.2972	13.3431	12.2996	7.4491	9.85245
EVM0009736	1	PREDICTED: uncharacterized protein LOC104604003	44.8442	26.9901	10.3768	10.4859	17.2694	26.9077	24.9286	24.6974	0.846178	11.0534	2.26125
EVM0001983	1	PREDICTED: zinc finger protein GIS2	77.1311	66.5373	44.1469	54.2576	49.2249	54.1186	66.9863	61.6417	27.6472	38.571	38.1392
EVM0021967	1	PREDICTED: nuclear nucleic acid-binding protein C1D	30.4916	23.8708	17.3958	13.0799	17.5234	20.9009	19.0637	18.7229	9.72787	14.9367	15.946
EVM0029140	1	PREDICTED: glucuronokinase 1	116	53.8506	46.6978	41.7655	59.2293	43.1612	57.2032	61.4979	14.9569	26.3639	30.5626
EVM0010707	1	PREDICTED: 40S ribosomal protein S26-3	14.9853	10.8589	7.12506	5.62743	8.29482	11.7698	7.57008	7.47702	3.1573	4.99615	4.34357
EVM0024299	1	PREDICTED: zinc finger protein GIS2-like	81.7896	61.335	57.0634	49.5107	43.6443	51.4998	53.2198	49.373	19.478	38.8972	31.0109
EVM0003409	1	PREDICTED: beta-glucosidase BoGH3B-like	84.4526	35.7405	23.0948	26.7087	22.5895	39.3461	25.4419	33.6841	1.91928	7.79357	23.816
EVM0014694	1	PREDICTED: uncharacterized protein LOC107420549 isoform X2	63.1551	33.8472	21.2644	19.7812	29.1072	40.9319	31.1731	20.6206	1.01756	6.74968	7.73856
EVM0016305	1	Function unknown	145.521	93.3436	108.461	96.9163	82.004	99.9981	121.365	110.495	42.4471	78.0986	58.4064
EVM0026835	1	F-box protein At3g07870-like isoform X1	12.1344	3.16693	7.772	4.24415	4.49329	5.84405	5.49815	5.66758	0.441331	5.67097	1.05225
EVM0005264	1	60S ribosomal protein L5-like	227.98	182.452	143.569	141.527	140.77	169.546	146.124	125.078	57.0475	109.978	90.9201
EVM0017295	1	calcium-dependent protein kinase SK5	74.9889	59.4187	27.8925	50.5278	45.5884	52.4143	53.0355	55.41	18.0789	29.068	28.5105
EVM0018879	1	PREDICTED: auxin-responsive protein IAA1-like	62.6911	34.194	9.94894	0.894243	25.2874	21.2199	25.3709	18.2013	2.22398	4.52818	4.40064
EVM0004080	1	serine carboxypeptidase-like 18	32.2242	21.1594	11.7874	18.4775	19.4321	16.8356	9.88911	9.74441	1.78755	11.9754	2.11147
EVM0008285	1	PREDICTED: LOB domain-containing protein 38	65.9965	30.5275	15.7096	3.46734	16.4999	29.7601	23.931	16.7301	0.637219	4.19449	4.72931
EVM0020443	1	PREDICTED: uncharacterized protein LOC100247804	27.1435	14.4641	13.475	18.6775	14.275	18.0813	13.1311	11.2482	7.92391	9.73058	11.0408
EVM0019443	1	adenine/guanine permease AZG2 [Herrania umbratica]	22.0645	11.5608	1.67936	11.1702	12.3632	9.41129	10.1605	6.51535	0.0101953	3.25095	1.11253
EVM0002463	1	PREDICTED: autophagy-related protein 8C [Fragaria vesca subsp. vesca]	10.0865	4.78482	2.19477	4.41482	4.78207	4.40505	4.71888	4.6716	2.25712	2.0925	2.40475
Liquidambar_formosana_newGene_4566	1	UDP-glycosyltransferase 74G1-like	23.1648	13.2189	8.99353	16.3588	7.79634	16.5844	8.96818	5.02562	0.463755	8.15927	1.00169
EVM0021099	1	PREDICTED: uncharacterized protein LOC100264112	23.82	13.5957	12.6437	16.7778	14.0902	14.5135	16.427	16.8085	4.15008	11.5104	5.38144
EVM0005826	1	PREDICTED: 26S proteasome non-ATPase regulatory subunit 2 homolog A [Ricinus communis]	2.51464	1.17493	1.09118	0.356357	1.43925	1.31562	0.547493	0.733667	0.088991	0.231275	0.394622
EVM0022843	1	40S ribosomal protein S4-3 [Momordica charantia]	150.917	117.142	68.06	59.9059	74.6856	113.157	74.2857	63.4792	24.7071	59.8686	43.3992
EVM0000707	1	Zinc finger, B-box [Corchorus capsularis]	13.5192	7.74589	8.07881	7.14034	6.62433	9.15435	9.4049	7.16069	4.09066	4.24171	3.73271
EVM0002357	1	PREDICTED: DNA (cytosine-5)-methyltransferase 1	12.5481	9.7704	7.30316	6.84069	8.61994	6.29955	5.95997	6.21145	0.821815	2.37112	3.29043
EVM0018945	1	PREDICTED: uncharacterized protein LOC100245981 isoform X1	16.7105	7.33201	4.17523	8.51199	7.1705	10.9888	8.94869	7.53646	0.144352	1.59895	3.23868
EVM0018131	1	PREDICTED: AT-hook motif nuclear-localized protein 8 isoform X1	71.4386	42.4357	37.1155	34.9234	32.1331	50.2265	29.7145	25.4991	13.621	27.2221	27.7735
EVM0026976	1	hypothetical protein AQUCO_00200553v1 [Aquilegia coerulea]	43.6869	22.5375	16.1158	16.1221	19.8963	19.8855	14.7153	10.9228	3.45138	7.80142	5.93276
EVM0009482	1	unnamed protein product, partial	12.9445	7.73521	3.0559	1.92615	8.29679	7.97562	2.28294	0.919992	0.0303793	0.578468	0.29095
EVM0013855	1	putative methyltransferase DDB_G0268948 isoform X1	10.3368	6.4933	2.8119	7.01422	6.92004	7.95673	4.08597	2.67935	0.279475	3.44072	0.987992
Liquidambar_formosana_newGene_13605	1	DUF4283 domain-containing protein, partial	3.22797	1.60233	1.81217	1.16134	1.16092	1.42753	1.08521	1.37684	0.158028	0.424593	1.0687
EVM0013953	1	ras-related protein RABB1b	43.5059	23.9931	23.2484	29.0476	27.205	29.5965	31.475	27.6262	13.6003	21.5256	21.492
EVM0017669	1	PREDICTED: serine--tRNA ligase	58.7885	38.0476	35.9131	31.4045	38.001	53.1574	37.3053	35.2854	29.0926	34.7575	34.4842
EVM0003548	1	kinesin-like protein KIN-4C isoform X1	12.3653	9.78982	9.01741	5.79646	7.35332	8.47316	6.46794	6.74932	4.57583	3.10378	5.35008
EVM0027821	1	PREDICTED: calcium/calmodulin-regulated receptor-like kinase 1	31.934	19.0011	20.3053	21.1419	24.5168	19.1365	20.7885	15.3782	8.0271	26.9414	14.5844
EVM0016332	1	pectinesterase family protein	4.3358	2.9118	0.851532	1.81445	2.25668	1.46308	1.97495	0.938528	0.0530497	0.654973	0.018102
EVM0022085	1	--	2360.48	727.072	896.739	466.784	722.22	595.842	778.428	940.465	4.58631	177.82	73.5723
EVM0028997	1	PREDICTED: uncharacterized protein LOC100242968	42.2669	22.2733	24.841	22.8889	23.2189	28.2476	23.8798	22.2922	6.94836	12.624	14.8276
EVM0020080	1	putative methyltransferase DDB_G0268948	45.867	20.5772	13.3863	24.5724	21.8579	22.2594	17.6603	14.1151	1.37315	11.2774	1.83026
EVM0013214	1	PREDICTED: scarecrow-like protein 3 isoform X1	25.0296	12.4909	11.7522	13.8929	8.12218	13.6814	10.0528	14.2097	6.11248	7.82072	5.03526
EVM0019430	1	PREDICTED: uncharacterized protein LOC100256556	12.6422	10.1259	5.11113	4.35037	6.76547	5.00979	5.71758	6.5368	1.02481	2.92231	3.66221
EVM0014302	1	PREDICTED: 3-isopropylmalate dehydratase small subunit 3-like [Gossypium hirsutum]	175.826	143.678	106.797	98.895	116.22	149.47	93.3617	82.0121	61.8409	80.9524	65.0946
EVM0028940	1	PREDICTED: cell division cycle 5-like protein	67.9614	46.473	37.1583	52.5443	44.542	44.0882	46.2169	47.5367	25.1148	31.3282	34.1567
EVM0024962	1	PREDICTED: methylecgonone reductase	77.0262	27.4131	25.8439	28.5724	53.1643	44.8428	31.1117	14.381	9.99187	53.3053	5.38922
EVM0002552	1	Protein Pet [Parasponia andersonii]	5.41288	3.32358	2.87158	2.17124	3.14766	3.79139	2.89584	2.42769	1.27682	1.8963	1.29496
Liquidambar_formosana_newGene_7418	1	Function unknown	6.11411	4.03948	1.98178	2.7395	3.21807	4.43404	3.36808	2.9735	0.442121	1.3748	1.35515
EVM0008781	1	PREDICTED: F-box protein GID2	37.0395	18.8393	11.7639	19.0521	13.969	25.6236	20.5445	20.3627	2.36941	4.94558	12.42
Liquidambar_formosana_newGene_1925	1	Function unknown	47.0273	30.1412	20.701	18.8604	17.4552	20.3472	27.2537	22.8341	1.32149	6.97649	9.62575
EVM0006502	1	dol-P-Man:Man(6)GlcNAc(2)-PP-Dol alpha-1,2-mannosyltransferase [Jatropha curcas]	24.616	18.1254	13.0471	11.9889	14.8601	18.7212	18.5272	14.8178	8.61602	12.0786	14.7018
Liquidambar_formosana_newGene_4525	1	Function unknown	6.84725	5.14887	3.87712	4.13865	5.10618	3.79126	4.25479	4.70702	2.39774	2.59869	2.81601
EVM0016838	1	PREDICTED: aspartokinase 1, chloroplastic isoform X1	18.6796	12.1102	13.0967	11.7736	9.37901	11.7327	9.39252	8.20995	3.80574	7.25877	5.87051
EVM0012270	1	PREDICTED: inosine-5&apos;-monophosphate dehydrogenase 2-like isoform X1	130.324	86.7852	69.1912	68.7833	67.6346	67.5993	63.6857	72.771	36.3388	69.4643	38.3701
EVM0006475	1	hypothetical protein VITISV_028672	7.52564	4.81139	4.27217	5.21275	3.85775	4.1934	4.53615	3.94247	1.45428	3.70174	3.31398
EVM0029166	1	OBERON-like protein [Jatropha curcas]	92.9491	78.6979	48.6492	68.309	65.0717	69.2436	58.2688	45.3044	32.1925	50.311	41.6538
EVM0019185	1	PREDICTED: E3 ubiquitin-protein ligase MIEL1	16.1402	13.4002	10.1632	8.4723	11.1309	11.7573	10.4246	8.69065	5.03468	6.03952	4.58643
Liquidambar_formosana_newGene_5771	1	hypothetical protein GOBAR_AA00350 [Gossypium barbadense]	3.9364	2.09347	2.05666	3.32581	2.47536	2.55238	2.46574	2.41116	1.36512	1.21972	1.07403
EVM0001048	1	PREDICTED: uncharacterized protein LOC104609040	39.9438	23.0459	25.1816	28.8108	28.8487	24.3913	24.8668	27.9184	23.5788	14.9874	14.8263
EVM0006046	1	aldose 1-epimerase-like	11.8836	7.43439	3.89823	1.99583	8.74456	5.77024	4.70888	3.86886	0.749408	0.889607	0.610182
EVM0001967	1	probable glutathione S-transferase [Prunus persica]	10.3221	4.64931	4.80044	2.08672	5.32497	6.97488	3.99087	3.51667	0	1.9234	0
EVM0023337	1	PREDICTED: uncharacterized protein LOC104880236	36.3927	26.0697	27.6672	23.1666	21.7467	29.3027	26.5866	24.7472	11.0716	15.9222	17.4262
EVM0027566	1	hypothetical protein BC332_00906 [Capsicum chinense]	15.2355	8.25966	8.25227	4.1176	10.9929	9.96304	5.79548	5.35495	0.881402	4.26523	0.481771
EVM0007332	1	U-box domain-containing protein 13 [Jatropha curcas]	163.301	85.9744	105.536	96.1023	107.88	114.072	98.2015	90.9353	41.7529	71.6826	45.9303
EVM0029280	1	PREDICTED: H/ACA ribonucleoprotein complex subunit 4	79.94	64.7049	45.5623	40.637	38.4373	63.7154	47.6474	41.9012	8.46771	24.6835	20.7179
EVM0004676	1	PREDICTED: ethylene-responsive transcription factor ERF113	101.958	49.7483	46.3246	25.7452	45.8249	67.5848	61.7312	41.499	0.927527	32.6192	0.83263
EVM0016121	1	secoisolariciresinol dehydrogenase-like	38.1478	7.77253	4.84699	3.77071	14.2982	15.0884	11.9211	11.9731	0.314942	0.995414	0.800989
EVM0007750	1	Basic-leucine zipper transcription factor [Parasponia andersonii]	63.3064	32.6504	26.877	28.9263	54.0203	30.1223	35.0889	30.3206	19.587	20.3764	21.0872
EVM0011795	1	PREDICTED: U3 small nucleolar RNA-associated protein 18 homolog	16.0234	12.286	10.9293	7.96273	9.0003	14.184	8.66152	7.33761	3.59551	5.69571	3.87138
EVM0018359	1	eukaryotic translation initiation factor 3 subunit L-like	77.8231	64.6717	47.4888	48.1895	46.4464	72.0085	45.5363	39.3132	26.45	38.5876	30.9927
EVM0003594	1	protein P21-like	147.168	32.8885	13.5429	15.7804	65.9966	68.7875	47.3484	38.8717	8.35394	28.6161	6.90197
EVM0024117	1	PREDICTED: 5-oxoprolinase	24.1684	17.5588	12.0026	19.0879	14.3032	15.4006	17.4903	14.4147	3.55779	7.9433	8.2357
EVM0013982	1	PREDICTED: uncharacterized protein LOC100256408	76.0944	53.7041	28.9621	34.6849	36.037	62.0083	46.1743	33.8778	1.86443	9.73192	11.791
EVM0002085	1	PREDICTED: 60S ribosomal export protein NMD3	4.57319	3.16322	1.39985	2.01252	3.3309	3.02631	2.83995	2.51005	1.22306	1.40011	1.60052
Liquidambar_formosana_newGene_3702	1	Function unknown	6.44855	4.00712	3.62772	0.219521	2.78222	5.38925	3.58779	2.80797	0.298269	0.521618	0.68779
Liquidambar_formosana_newGene_3974	1	tau class glutathione transferase GSTU43	14.4114	3.04449	6.96571	1.33524	6.63101	5.64139	5.8226	4.41109	0.194372	1.28818	2.20208
EVM0017684	1	PCI domain-containing protein/eIF-3c_N domain-containing protein	45.3659	34.8694	26.37	31.9292	30.5252	37.5996	33.2818	33.8961	8.30946	22.9443	17.5371
EVM0020841	1	PREDICTED: F-box/kelch-repeat protein At1g67480	119.3	65.4948	54.8833	79.1638	82.4031	85.9062	74.2773	76.5655	21.3882	50.438	31.8008
EVM0026797	1	60S ribosomal protein L6 [Jatropha curcas]	42.8971	30.0193	25.0041	28.2132	32.6879	38.3071	31.0369	23.987	11.935	23.4988	15.8952
EVM0016376	1	PREDICTED: pre-mRNA-splicing factor 18-like [Gossypium hirsutum]	54.6723	28.106	20.6905	24.8394	29.2057	31.2574	32.8051	32.5277	13.9734	11.5952	12.1611
EVM0024830	1	PREDICTED: myb-related protein B-like	36.6506	22.2838	15.7731	11.8686	19.2565	32.8174	22.369	18.2165	2.83128	2.76248	6.86238
EVM0003886	1	transcription factor CSA-like	21.2386	12.1253	9.60359	5.7961	8.50385	19.1996	12.6618	9.34166	1.90178	1.86067	5.28791
EVM0023586	1	hypothetical protein CCACVL1_07542 [Corchorus capsularis]	62.9435	43.1917	36.2464	28.6229	40.9945	69.8763	26.8711	28.4004	39.6362	14.3839	17.3343
EVM0000094	1	PREDICTED: protein RTF1 homolog	26.5067	23.2375	12.9586	15.1192	19.166	17.8079	20.0605	15.8778	2.92167	4.24998	9.1306
EVM0020700	1	probable disease resistance protein At4g27220	10.6899	5.22949	6.38558	5.399	6.58517	5.30026	6.1527	7.58413	3.02931	2.70478	2.71865
EVM0027103	1	PREDICTED: U-box domain-containing protein 26 [Theobroma cacao]	33.6741	13.6717	13.2598	6.58293	19.2392	30.5184	12.1238	7.33173	0.086367	1.23133	0.726856
EVM0018933	1	PREDICTED: N-alpha-acetyltransferase 15, NatA auxiliary subunit isoform X1	73.0618	65.0942	47.9618	56.4289	56.653	70.5442	52.8396	45.5021	35.8938	44.8245	35.4611
EVM0009452	1	PREDICTED: mediator of RNA polymerase II transcription subunit 11-like	67.5625	62.0944	51.9909	45.8238	55.944	52.5522	55.0609	61.3112	26.5634	41.989	27.8382
EVM0015460	1	unnamed protein product, partial	13.2595	5.51399	6.16097	0.67849	10.5794	7.84764	4.94543	5.34652	0.048385	3.95278	0.687967
EVM0021899	1	serine/threonine-protein kinase D6PK	3.45453	2.4032	2.49187	1.24663	1.76746	3.39563	2.57372	1.176	0.289652	0.980425	1.06669
EVM0018360	1	unnamed protein product, partial	39.6421	28.8072	20.019	28.7167	32.8394	29.3315	25.8373	29.1906	10.8401	18.2609	10.9986
EVM0022546	1	PREDICTED: chaperonin CPN60-2, mitochondrial	117.353	86.9275	73.6716	47.358	71.3841	110.089	73.8577	63.7002	17.1035	36.4572	28.4567
EVM0009998	1	eukaryotic translation initiation factor 3 subunit E [Prunus persica]	186.56	142.481	98.2641	83.8547	133.113	164.945	131.22	119.786	59.6513	95.3357	68.7492
EVM0017823	1	uncharacterized protein LOC105643248 [Jatropha curcas]	28.189	17.3111	13.2359	18.219	25.121	17.8371	17.4452	17.5421	1.52897	4.25431	3.49356
EVM0021507	1	cucumber peeling cupredoxin-like [Herrania umbratica]	45.4567	25.8163	36.7231	28.8502	21.0115	28.3608	27.6382	28.8638	2.04122	17.4666	11.3022
EVM0008860	1	PREDICTED: beta-1,3-galactosyltransferase 7	19.5151	11.3142	13.8856	14.52	14.3398	21.4211	12.1958	16.1076	5.18103	13.2102	6.44238
EVM0018904	1	PREDICTED: ultraviolet-B receptor UVR8	6.41909	5.55378	4.35926	4.13404	5.08364	6.012	5.13757	4.57923	2.28442	3.31107	3.66746
Liquidambar_formosana_newGene_8738	1	hypothetical protein GOBAR_AA10425 [Gossypium barbadense]	7.1458	4.14537	3.80548	4.15224	3.58088	5.9981	5.36039	4.60141	0.575061	1.4995	3.26939
Liquidambar_formosana_newGene_9148	1	serine/threonine-protein kinase STY46 isoform X2 [Vigna radiata var. radiata]	26.2141	27.3688	22.7294	3.00591	24.4342	15.9567	15.0631	17.4944	2.82401	2.45348	5.15119
EVM0017763	1	PREDICTED: universal stress protein PHOS34-like isoform X1	89.3291	66.9115	72.8645	53.5052	66.6356	67.3919	73.9447	67.7493	19.3416	42.1796	39.0506
EVM0009181	1	PREDICTED: aspartate aminotransferase, cytoplasmic	327.403	256.504	182.523	121.919	289.492	233.436	244.469	217.522	57.2471	122.011	66.6699
EVM0015659	1	PREDICTED: uncharacterized protein LOC100260963	205.89	104.567	112.108	82.2657	186.104	142.811	124.898	97.2449	12.7525	20.1511	16.6934
EVM0019612	1	PREDICTED: 1-aminocyclopropane-1-carboxylate oxidase homolog 1	75.5967	31.8324	12.0288	10.4305	59.4305	25.0333	32.1578	32.3608	0.329476	11.9763	1.05602
EVM0005496	1	PREDICTED: phosphate transporter PHO1 homolog 3-like isoform X2	8.26471	4.19993	3.23109	0.986125	8.43572	8.88198	2.23677	3.10013	2.03626	0.825293	0.853934
EVM0019176	1	PREDICTED: pre-mRNA-processing factor 19	94.7164	77.1186	55.7069	59.2856	68.1771	94.2252	69.1256	65.1665	43.9288	49.5993	47.3442
Liquidambar_formosana_newGene_723	1	uncharacterized protein LOC110811452	1.20869	0.648684	0.39462	0.791681	1.16475	0.845972	0.812966	0.72698	0.034088	0.137489	0.184111
EVM0007178	1	PREDICTED: signal peptide peptidase	99.1821	76.9382	79.8054	76.3137	87.1656	101.585	78.6412	72.8739	39.8056	68.6827	52.5167
Liquidambar_formosana_newGene_11579	1	protein arginine N-methyltransferase 2 isoform X2 [Morus notabilis]	4.24722	2.70157	3.80094	1.77318	2.17268	3.28918	2.08984	3.12538	0.623672	0.921013	1.56452
EVM0011946	1	PREDICTED: 3-oxo-Delta(4,5)-steroid 5-beta-reductase-like	30.0737	9.59276	9.03933	6.23895	16.1251	21.8457	16.8906	12.5205	1.75662	5.88456	0.870229
EVM0005870	1	PREDICTED: serine/threonine receptor-like kinase NFP	31.8307	20.5154	12.6928	11.1715	19.4878	19.6599	26.4071	18.6944	2.66259	2.92523	4.29256
EVM0027381	1	2OG-FeII_Oxy domain-containing protein/DIOX_N domain-containing protein	190.145	88.1089	157.143	53.3237	115.276	206.174	70.8425	59.1465	1.58441	21.0067	0
EVM0011448	1	PREDICTED: uricase-2 isozyme 2	186.575	174.036	101.521	121.116	164.553	107.637	152.002	158.293	48.7232	90.6349	35.6801
EVM0000282	1	PREDICTED: uncharacterized protein LOC107418888	12.222	7.8423	9.64726	6.87204	9.88231	9.06898	10.9061	8.71712	7.96009	9.38737	2.8337
EVM0025493	1	transcription initiation factor TFIID subunit 15 [Jatropha curcas]	13.8898	9.53255	9.74165	10.9858	10.2605	9.84446	9.15837	9.61479	3.0554	5.15839	3.91766
EVM0007876	1	PREDICTED: glucan endo-1,3-beta-glucosidase 9	3.3795	1.61596	2.20231	1.54996	1.93894	3.30873	2.34518	1.84287	0.728814	1.74101	2.29572
EVM0017883	1	PREDICTED: laccase-14	49.368	6.69402	17.1629	5.8491	49.0458	12.6921	6.91564	2.68915	0	3.63525	0.0302877
EVM0003768	1	hypothetical protein VITISV_013614	104.095	82.6101	47.502	57.0586	66.6992	82.2395	88.5772	76.3439	28.2061	34.5326	46.8911
EVM0028232	1	uncharacterized protein LOC111990213	2.18002	1.85511	0.840743	1.66741	1.90399	1.72461	1.48354	1.22412	0.0314397	0.1397	1.05507
EVM0017475	1	PREDICTED: AT-hook motif nuclear-localized protein 17	186.641	93.1321	155.121	96.2347	107.092	163.976	114.389	122.706	31.0161	15.1559	46.0724
EVM0019772	1	uncharacterized protein LOC112022319	228.735	74.9391	110.259	10.1901	239.666	151.702	57.1347	46.6904	13.4857	8.80789	1.51878
EVM0023246	1	FT-interacting protein 1 [Sesamum indicum]	79.2111	59.2228	23.4132	39.5775	46.0852	64.0588	62.1789	55.4789	13.0243	11.8495	31.5735
EVM0018648	1	aspartate aminotransferase, mitochondrial [Momordica charantia]	38.5593	28.2146	25.2074	24.5865	48.5552	19.8277	22.1009	15.7074	4.22076	9.59939	3.88322
EVM0001886	1	hypothetical protein AQUCO_02800108v1 [Aquilegia coerulea]	6.01253	1.63133	3.92099	1.74775	2.17794	9.55793	0.917328	0.306345	0	0.677612	0.149715
EVM0000943	1	uncharacterized protein LOC112000396 isoform X2	55.2422	44.9426	24.6811	24.3312	39.4192	51.4212	44.1071	35.4374	10.0105	21.7715	13.6785
EVM0022423	1	PREDICTED: putative F-box protein At1g49610	21.222	18.1251	13.7551	14.0478	19.8731	18.4067	17.7626	18.3511	10.643	10.7505	11.6083
EVM0020956	1	PREDICTED: VQ motif-containing protein 17	39.8462	9.35763	13.183	31.5854	44.7722	17.9333	7.00647	6.56098	6.36261	3.14702	1.67963
EVM0014634	1	PREDICTED: F-box/LRR-repeat protein At3g26922	10.9423	10.1829	6.45602	8.45821	11.3002	8.60012	8.51455	8.30283	1.80449	5.12812	4.98455
EVM0010764	1	GCK [Trema orientalis]	18.5375	15.0047	18.1277	7.63851	13.1109	20.0306	12.9396	12.6802	4.51344	13.1858	6.06948
EVM0025492	1	PREDICTED: hemK methyltransferase family member 2-like	3.57521	2.30041	2.45161	2.33182	2.59136	3.42456	3.25381	2.72871	1.4642	2.05338	1.44388
EVM0009189	1	PREDICTED: putative gamma-glutamylcyclotransferase At3g02910	15.774	11.1048	9.504	7.41532	10.4725	11.5086	12.6351	12.6925	6.65209	5.27802	5.4709
EVM0010770	1	PREDICTED: 1-aminocyclopropane-1-carboxylate oxidase 5 [Ricinus communis]	16.7461	9.98641	6.26079	4.74701	11.7764	16.539	13.9635	9.79024	0	0.163753	0.0251537
Liquidambar_formosana_newGene_3977	1	PREDICTED: probable glutathione S-transferase [Theobroma cacao]	11.3567	5.35913	4.87049	2.46625	9.08089	6.26902	5.35722	7.52614	2.55225	3.41612	1.18604
EVM0026864	1	PREDICTED: CASP-like protein 4D1 [Ricinus communis]	7.58084	1.18864	0.586494	3.55783	6.43628	3.22226	2.4177	3.29785	0.51101	0.79232	0.310374
EVM0009457	1	ras GTPase-activating protein-binding protein 2 isoform X1	110.752	84.7379	64.9061	65.2275	84.9888	102.505	105.617	92.6534	28.7126	55.517	52.3583
EVM0014259	1	pre-mRNA-splicing factor 18-like [Cucurbita pepo subsp. pepo]	41.3453	32.7873	25.8609	22.9528	33.066	38.8292	42.8815	32.8814	11.0251	15.8837	14.0596
EVM0027524	1	PREDICTED: uncharacterized protein LOC107420071	108.912	79.1484	96.8927	80.4816	113.324	99.0661	95.7121	85.6755	36.6708	75.2064	38.9726
EVM0012988	1	cysteine-rich repeat secretory protein 38-like	28.9581	1.6456	1.91619	0.962334	27.8662	11.4904	5.23434	4.9778	0	0.649899	0.0425837
EVM0024323	1	glutamate receptor 2 plant, putative [Ricinus communis]	72.5315	30.44	21.4875	7.74884	22.9274	42.1234	52.3221	38.5469	0.443116	6.23765	0.570705
EVM0005583	1	PREDICTED: protein LURP-one-related 10-like [Gossypium hirsutum]	83.6718	36.9726	32.7568	26.3963	78.2632	57.0486	47.8232	52.3914	17.8703	38.9492	10.8827
EVM0010251	1	endo-1,3;1,4-beta-D-glucanase-like isoform X2 [Durio zibethinus]	57.889	26.8799	17.4537	37.0097	38.8933	57.0222	40.4087	37.8794	13.4582	33.7852	18.921
EVM0029147	1	PREDICTED: scarecrow-like protein 1	63.9795	34.0455	22.2121	20.3962	49.1537	50.751	52.5086	43.1711	8.38884	14.8838	7.61969
EVM0000658	1	PREDICTED: protein phosphatase 2C 29	43.2352	26.1918	40.2098	18.2406	38.2043	43.6805	28.35	21.8885	14.9887	28.8218	16.8702
EVM0006089	1	PREDICTED: glucuronokinase 1-like	61.6242	29.4129	31.3032	24.1373	51.8971	32.8293	41.3774	43.4684	8.36944	15.1394	18.4866
EVM0006483	1	tau class glutathione transferase GSTU43	4.14632	0.999519	2.81063	0.584965	2.99691	3.82279	2.82497	2.33468	0.0818007	0.0566887	0.915935
EVM0021705	1	hypothetical protein CISIN_1g031354mg	10.0066	5.83522	7.40076	10.3811	10.0794	11.373	7.39281	8.49591	3.19722	5.3077	6.32419
EVM0010437	1	calcineurin subunit B	22.7881	12.6567	11.1987	10.3718	19.066	16.3394	17.8015	16.8417	5.02812	7.81522	7.69782
Liquidambar_formosana_newGene_7234	1	hypothetical protein PHAVU_001G095900g [Phaseolus vulgaris]	0.73708	0.423227	0.545041	0.298593	0.716505	0.529667	0.452395	0.742268	0.191246	0.0199773	0.234896
EVM0009593	1	PREDICTED: uncharacterized protein LOC109002109	45.3817	31.7373	41.7334	27.3636	32.7818	35.5393	33.8457	33.068	11.3731	22.3171	10.4065
EVM0004434	1	PREDICTED: ribosomal RNA small subunit methyltransferase, chloroplastic	14.4619	7.93254	5.62134	4.5927	15.8657	6.64145	9.34784	7.4102	6.86197	3.20066	2.37541
EVM0000908	1	Aldose_epim domain-containing protein	141.072	99.4453	94.724	40.7206	175.896	110.687	90.6285	81.4611	18.4383	13.5899	13.5837
EVM0020663	1	AP2-like ethylene-responsive transcription factor At2g41710 isoform X2 [Morus notabilis]	9.36413	7.25971	6.93205	5.86832	8.50233	7.49687	7.62441	7.35532	2.73611	4.57071	8.44191
EVM0018694	1	acyl carrier protein 1, chloroplastic-like	9.81561	3.15684	1.47414	2.40502	5.68283	7.69452	8.66992	3.79539	0.172082	0.482125	0.2014
EVM0023921	1	PREDICTED: uncharacterized protein LOC100247848	29.7329	1.1663	7.90835	0.557228	23.9985	11.0039	7.42991	10.4193	2.3148	1.84864	0.410916
EVM0025931	1	PREDICTED: eukaryotic translation initiation factor NCBP	106.954	89.9852	63.4201	63.8911	85.4781	83.5991	91.1385	100.231	45.9319	62.87	55.0015
EVM0016579	1	uncharacterized protein LOC111984744	6.80822	1.63818	4.639	2.99428	3.12041	3.89394	4.36773	4.04147	0.0623413	0.72348	3.36249
EVM0027186	1	PREDICTED: dof zinc finger protein DOF3.4	50.9259	5.49526	36.4057	5.66489	18.9733	21.1535	31.6963	21.0973	0.290819	5.07874	12.1172
EVM0007625	1	PREDICTED: probable gluconokinase isoform X1	33.8238	16.7356	28.5306	14.3128	25.654	15.0664	14.107	14.7361	2.1506	4.94879	3.13697
EVM0018649	1	PREDICTED: zinc finger CCCH domain-containing protein 14	92.7524	55.3664	53.9073	44.2628	63.3278	78.8928	78.9542	66.7516	28.2104	42.9634	43.8228
EVM0013834	1	RING-H2 finger protein ATL11 [Jatropha curcas]	39.2616	16.6962	27.7091	14.3881	20.5996	17.2165	12.2878	10.8587	0.783662	4.99633	1.68392
EVM0001911	1	Tau class glutathione transferase GSTU43 [Theobroma cacao]	25.8263	8.01576	10.0632	2.91445	23.7829	17.4969	16.252	16.7412	1.23118	7.72865	1.17275
EVM0024865	1	probable WRKY transcription factor 75 [Herrania umbratica]	47.1127	4.33199	17.443	5.85374	44.7142	23.0187	15.3236	17.1764	7.37062	17.7727	8.50815
EVM0028441	1	probable xyloglucan endotransglucosylase/hydrolase protein B [Olea europaea var. sylvestris]	158.666	54.8019	26.0845	69.5721	48.7485	33.9199	57.8435	71.2643	0.286981	14.4077	14.7776
EVM0014364	1	RecName: Full=Basic endochitinase; Flags: Precursor	581.614	57.7384	40.6493	47.5187	255.387	376.998	238.983	196.425	8.36985	78.7019	16.6002
EVM0018488	1	PREDICTED: protein arginine N-methyltransferase PRMT10	134.218	84.9192	51.087	52.687	84.1306	99.4841	82.9605	91.3338	40.6913	59.3243	69.1
EVM0011583	1	uncharacterized protein LOC110745886	16.6881	7.4241	7.58878	8.28146	9.97837	13.2607	11.7923	11.9355	2.31302	5.58773	7.93343
EVM0026531	1	PREDICTED: cysteine-rich repeat secretory protein 38	108.222	11.7959	42.8353	45.2675	86.3647	40.6811	5.99231	6.17852	0.201363	23.9619	0.0821753
EVM0023368	1	PREDICTED: ADP-ribosylation factor GTPase-activating protein AGD3	6.08457	2.47147	3.05539	1.85539	2.56702	2.777	1.70453	2.19404	0.154806	0.602541	2.31612
EVM0017549	1	cysteine-rich repeat secretory protein 38-like	11.3805	0.729277	0.976501	0.759325	12.1775	5.19079	3.1029	2.83527	0.0235477	0.309485	0.076136
EVM0027945	1	LRR_1 domain-containing protein/LRRNT_2 domain-containing protein/LRR_4 domain-containing protein	15.5475	8.00241	11.2222	10.1182	15.8465	13.7464	5.15952	2.3226	0.279422	4.21654	0.437492
EVM0003458	1	ras-related protein RABB1b	62.4376	33.2206	27.711	42.8888	32.4072	31.2799	33.3014	27.2538	19.117	24.2277	19.9275
EVM0024424	1	homeobox-leucine zipper protein ATHB-40-like	43.3855	12.1134	22.4692	24.1708	30.0924	10.7545	10.564	6.0111	0.365107	3.00374	7.27283
EVM0016556	1	hypothetical protein COLO4_17396	10.6409	3.20696	2.38882	3.42045	7.73127	10.9454	5.52673	4.83836	1.47009	7.69612	0.954364
EVM0016540	1	PREDICTED: LOB domain-containing protein 38	177.651	91.4484	110.361	119.328	128.813	133.647	103.099	86.6932	41.1147	129.375	114.962
EVM0022758	1	PREDICTED: F-box protein At3g07870	14.6785	4.2482	7.22838	5.39176	5.54771	8.00064	7.59837	7.35694	1.15172	10.6766	1.62005
EVM0023383	1	hypothetical protein AQUCO_02100241v1 [Aquilegia coerulea]	88.7464	58.537	54.338	63.847	57.2317	63.2999	56.2993	60.8326	32.4642	66.1026	54.964
EVM0018832	1	PREDICTED: uncharacterized protein LOC100258555	101.493	23.4165	12.076	9.58103	35.8458	29.6463	35.1239	26.5485	0.436629	2.90302	6.84598
EVM0020890	1	PREDICTED: kunitz trypsin inhibitor 2-like	702.43	86.4657	205.357	311.385	465.662	184.75	58.1995	32.789	0.147109	20.563	1.02155
EVM0020913	1	PREDICTED: eukaryotic translation initiation factor 3 subunit M	100.886	80.5668	66.7071	63.7694	83.4813	88.8608	82.6336	78.5408	63.7689	69.2234	69.7238
Liquidambar_formosana_newGene_14085	1	Function unknown	10.4327	0.891132	0.100167	0.018703	7.59446	1.76028	2.86605	2.17679	0.167935	0	0.118085
EVM0000829	1	PREDICTED: heat shock cognate 70 kDa protein 2-like isoform X1	2.45959	0.076801	0.283333	0.071133	1.37811	1.04377	0.51534	0.265987	0.151606	0.215235	0.0172477
EVM0015811	1	--	16.3146	0.791989	0.890434	1.06478	5.85102	7.48999	4.76717	4.66104	0.126931	1.80688	0.842104
EVM0017822	1	PREDICTED: uncharacterized protein LOC18608721	403.62	75.4546	59.7519	54.8706	252.174	101.656	90.754	79.6881	8.55385	16.2833	41.4083
EVM0023441	1	probable pectinesterase 53 [Herrania umbratica]	5.57325	0.429882	0.502463	0.171791	3.7427	3.16441	2.57458	2.42392	0.010824	0.127776	0.0873413
EVM0004842	1	PREDICTED: protein QUIRKY	13.0033	3.22181	2.28339	3.65087	6.01594	5.79261	9.32041	6.12821	0.0424117	0.567051	2.21089
EVM0010129	1	protein NUCLEAR FUSION DEFECTIVE 6, chloroplastic/mitochondrial-like isoform X6 [Durio zibethinus]	42.5462	25.192	23.9811	9.71048	20.389	34.1815	22.925	21.2502	9.07398	21.362	18.93
EVM0023111	1	PREDICTED: protein NUCLEAR FUSION DEFECTIVE 6, chloroplastic/mitochondrial isoform X4	21.3483	15.5236	12.5004	9.22338	15.2457	23.2547	13.2351	13.1309	7.77397	11.3949	7.94439
EVM0011922	1	JAB/MPN domain [Macleaya cordata]	193.383	144.336	83.7935	89.4565	125.432	157.205	89.2662	77.8756	87.5385	100.211	83.7884
EVM0000922	1	PREDICTED: uncharacterized protein LOC107806770 [Nicotiana tabacum]	85.8066	63.646	66.8018	46.3034	48.601	59.661	55.3226	50.8926	33.814	66.642	45.192
EVM0019095	1	PREDICTED: plant cysteine oxidase 2	311.834	193.892	47.7016	62.4597	354.549	277.082	291.472	233.49	7.33746	56.1319	56.8692
EVM0015338	1	40S ribosomal protein S5	405.465	258.962	129.827	122.649	203.712	265.136	205.402	197.985	149.692	176.227	150.276
EVM0021207	1	beta-glucosidase 1 GH1 family	176.276	20.0098	66.2283	11.3566	220.445	37.1039	29.7761	22.3776	0	9.05763	0.118197
EVM0027762	1	PREDICTED: exosome complex component RRP45A isoform X1	12.8752	8.54638	3.969	6.74612	6.18315	9.0942	7.49797	4.80737	2.00021	6.1479	6.1117
EVM0015351	1	PREDICTED: derlin-1	63.5256	39.9331	35.6318	41.5475	61.4232	54.3106	50.7389	53.7931	37.4872	35.8301	36.4625
EVM0014858	1	hypothetical protein POPTR_0018s03500g	18.501	13.1629	15.0457	10.594	19.0804	20.8543	14.1839	13.7793	7.6047	12.2273	10.7406
EVM0005581	1	PREDICTED: 60S ribosomal protein L7-2	189.328	138.706	87.9773	82.5829	140.371	168.584	171.704	155.807	65.4151	78.7254	84.629
EVM0015792	1	PREDICTED: ankyrin repeat-containing protein At3g12360 [Theobroma cacao]	15.0048	3.31165	6.54309	2.14433	7.53226	12.5318	8.25874	12.3832	2.58603	1.4415	1.25237
EVM0002022	1	PREDICTED: 60S acidic ribosomal protein P1-like isoform X1 [Ipomoea nil]	179.931	131.638	75.1404	58.433	91.8109	148.075	104.23	89.8843	21.1118	63.5299	59.5721
EVM0026611	1	PREDICTED: uncharacterized protein LOC18601967 [Theobroma cacao]	16.6625	12.8708	9.63891	9.33691	13.6198	15.2509	13.6985	11.5083	6.21546	10.2302	11.2815
EVM0027856	1	PREDICTED: 40S ribosomal protein S19-3	652.672	439.268	257.241	205.388	325.981	440.54	334.204	322.868	219.092	309.042	316.409
EVM0003694	1	PREDICTED: potassium channel AKT1-like	22.2316	6.90732	8.06729	4.35801	13.9016	15.9023	17.1442	13.3231	1.63826	5.32574	6.53752
EVM0023482	1	PREDICTED: plant cysteine oxidase 2 isoform X2	163.647	100.143	22.8505	48.1222	115.285	122.301	102.286	128.72	5.31679	106.537	17.2757
EVM0007369	1	40S ribosomal protein S17-4-like	103.692	57.0717	56.4873	36.3073	64.1294	96.6337	66.2397	58.211	37.8497	90.535	49.3728
EVM0021184	1	Homeobox domain [Macleaya cordata]	19.1642	1.68904	0.169854	0.794257	5.36603	9.35612	4.03249	1.94416	0	1.21737	0.093718
EVM0007494	1	hypothetical protein VITISV_007763	1.35452	0.79978	0.826396	0.409151	0.844025	0.92397	0.851625	1.24911	0.0345137	0.455229	0.753752
EVM0013129	1	Citrate synthase-like [Macleaya cordata]	149.238	108.545	92.9864	94.3316	173.726	121.277	146.513	123.409	51.3025	131.249	87.5085
EVM0004135	1	SNW/SKI-interacting protein-like	20.2085	14.9391	16.0875	16.454	18.568	19.7268	21.0726	19.8438	11.2775	16.1062	13.6234
EVM0003405	1	hypothetical protein VITISV_003708	10.6775	4.51136	6.83325	4.08048	7.62618	10.5134	8.58346	10.4165	1.81364	4.58415	3.94001
EVM0018613	1	uncharacterized protein LOC110425493 [Herrania umbratica]	4.45131	2.22824	2.46465	2.24091	2.77329	3.02401	3.40261	3.4122	1.13134	1.99212	2.32248
EVM0019616	1	unnamed protein product, partial	1.28482	0.726981	1.39561	0.574828	1.30458	1.1945	1.12325	1.00359	0.081962	0.63591	0.803547
EVM0025564	1	PREDICTED: 40S ribosomal protein S6-like	295.123	189.497	134.022	102.116	214.285	303.04	235.331	211.054	100.049	162.08	147.362
EVM0022707	1	PREDICTED: two-component response regulator-like PRR95 isoform X1	19.5288	4.02529	9.40835	3.85157	15.057	4.84124	6.12468	6.38521	4.46094	2.85649	3.76706
EVM0006451	1	PREDICTED: putative oxidoreductase TDA3	41.5159	26.4428	20.3806	23.1025	31.5588	32.0462	39.565	41.0339	13.8077	17.2908	13.9145
EVM0025705	1	40S ribosomal protein S17-4-like	134.833	75.0533	80.5089	41.2976	88.144	144.532	95.902	83.4674	46.4725	117.67	66.2522
EVM0025008	1	PREDICTED: uncharacterized protein LOC100264533	664.484	492.666	130.905	252.514	572.626	472.445	562.229	646.88	13.2483	209.51	229.192
EVM0019673	1	PREDICTED: 70 kDa peptidyl-prolyl isomerase-like isoform X1	27.5767	22.3866	25.9392	17.0825	25.6527	28.8572	27.6089	25.8283	7.97751	15.5017	17.7496
EVM0008780	1	PREDICTED: 40S ribosomal protein S16	146.665	99.5643	73.9042	56.6675	96.5039	122.765	94.8501	82.0466	40.4861	106.506	72.8275
EVM0002833	1	PREDICTED: 26S proteasome non-ATPase regulatory subunit 13 homolog A	172.059	148.714	96.5077	113.696	130.603	127.665	142.821	163.17	108.328	103.764	97.7881
EVM0012277	1	PREDICTED: plant cysteine oxidase 3	30.7503	3.40443	4.53784	0.190771	28.8616	9.76732	15.8597	20.7372	0.044413	1.40481	0.579675
EVM0028602	1	PREDICTED: bifunctional aspartokinase/homoserine dehydrogenase 2, chloroplastic-like [Gossypium arboreum]	49.4869	38.4922	31.8322	26.0416	44.1987	37.7125	47.0872	44.7701	17.1414	30.9829	31.4422
EVM0027169	1	PREDICTED: F-box protein PP2-B15-like	3.78336	0.263172	0.852525	0.236912	4.04564	3.76813	1.19391	0.483194	0.0384953	0.237362	0
EVM0007527	1	F21O3.2 protein [Theobroma cacao]	89.4455	16.469	7.00334	14.8869	35.471	32.9788	45.2583	41.8048	5.22411	3.82382	14.9253
EVM0010227	1	SPX domain-containing protein 1 [Jatropha curcas]	76.4565	8.95546	29.3009	4.68138	18.8769	20.5376	33.3927	27.9448	4.15385	7.35373	3.28779
EVM0014919	1	PREDICTED: uncharacterized acetyltransferase At3g50280	40.5561	14.4357	6.35331	4.51746	26.5107	19.6398	26.3517	33.6121	0.5126	6.68389	1.77791
EVM0009027	1	F-box/kelch-repeat protein [Vitis pseudoreticulata]	86.8958	32.9619	22.6588	14.7046	101.169	84.1745	84.3774	72.597	1.93413	9.07529	10.7767
EVM0016844	1	PREDICTED: pollen-specific leucine-rich repeat extensin-like protein 1 [Erythranthe guttata]	8.66799	1.56161	0.75177	3.27796	1.92068	3.35643	3.38509	4.66751	0.234092	1.76439	1.2294
EVM0009421	1	PREDICTED: uncharacterized protein LOC100268049	30.8295	3.84631	13.6981	10.6847	9.50543	14.706	19.4341	21.78	1.84003	5.92017	3.71447
EVM0015829	1	hypothetical protein CCACVL1_26250 [Corchorus capsularis]	9.02881	4.02398	4.65715	4.3849	11.1376	7.62549	8.73349	6.7718	0.419895	3.97288	3.51614
EVM0024137	1	glucan endo-1,3-beta-glucosidase 9 isoform X1	5.71785	1.95473	2.42991	1.66222	3.00445	4.36776	3.6352	2.97277	1.37205	2.1457	2.87571
EVM0015438	1	adenylosuccinate synthetase 2, chloroplastic	51.1151	32.9253	17.9731	21.1393	46.1682	39.0146	35.6583	36.2266	28.5754	31.2552	24.4464
EVM0021672	1	hypothetical protein VITISV_006850	177.894	31.4094	44.4232	29.5565	36.4961	64.4235	57.5217	91.5634	7.07089	36.3616	11.2035
EVM0000931	1	40S ribosomal protein S13-like [Durio zibethinus]	102.479	66.9199	35.7148	35.1287	54.4077	78.8662	58.4848	52.9191	25.8667	50.2465	46.2691
EVM0026914	1	PREDICTED: probable acyl-CoA dehydrogenase IBR3	66.9199	53.6583	44.2523	45.0734	71.4712	57.7153	66.1921	69.98	23.7585	46.7096	40.7627
EVM0018621	1	PREDICTED: 40S ribosomal protein S16	110.723	64.751	62.5315	44.2443	67.2485	88.3653	63.3078	55.468	43.849	86.0456	62.0312
Liquidambar_formosana_newGene_13079	1	PREDICTED: 60S ribosomal protein L31 [Ipomoea nil]	695.276	483.807	239.34	212.43	390.058	506.334	499.857	457.512	229.557	302.733	312.936
EVM0018942	1	PREDICTED: la-related protein 1A	32.5748	26.6536	31.0245	24.6691	29.969	32.1091	25.6676	25.917	29.2411	27.122	24.936
EVM0000165	1	HAD-superfamily hydrolase, subfamily IA, REG-2-like [Parasponia andersonii]	102.788	69.1749	18.9454	32.9309	55.5772	39.461	79.3538	81.2419	5.44969	51.5639	20.1676
EVM0020217	1	PREDICTED: plasma membrane ATPase 4	128.096	27.4934	66.133	24.5508	93.0608	136.549	94.5688	76.0602	57.4028	66.6936	51.0397
Liquidambar_formosana_newGene_6481	1	hypothetical protein COLO4_04217	33.1907	2.71801	1.71166	2.47269	10.8021	8.90798	6.79067	10.6431	1.04765	1.50653	0.033487
EVM0018026	1	uncharacterized protein LOC111994634 isoform X1	7.81471	5.19353	4.30841	4.44278	6.25509	7.4502	6.82123	6.03618	1.9846	4.47442	6.26568
EVM0005176	1	Glyoxalase II 3 [Theobroma cacao]	71.2643	30.3207	18.199	15.8267	80.2893	34.5032	61.2138	63.5687	8.11083	33.2095	12.9674
EVM0017977	1	probable beta-D-xylosidase 7	21.7454	12.7339	12.3958	5.40199	11.1006	19.7078	12.8777	12.2444	7.24577	6.73976	18.3217
EVM0005760	1	PREDICTED: uncharacterized protein LOC104611862	2.67114	1.16247	2.22978	0.623735	1.37786	1.85582	1.23039	0.559054	0.0198453	0.685546	1.36715
EVM0023515	1	PREDICTED: major allergen Pru ar 1	215.703	68.505	63.6868	27.114	68.3131	50.0174	44.7462	61.9101	2.41182	18.8299	2.07989
Liquidambar_formosana_newGene_7163	1	PREDICTED: protein SRC2-like	1.72197	0.441375	1.74205	0.829854	0.965531	1.01066	1.69822	1.38692	0	0.204496	0.208741
EVM0019163	1	zinc finger family protein	214.713	46.6647	49.1813	49.5835	290.302	84.9457	123.125	128.451	15.6978	18.4721	26.1665
EVM0019769	1	PREDICTED: probable aminotransferase TAT2 isoform X1	38.1054	15.4663	22.8809	27.0674	47.0631	16.0987	16.5375	15.2067	18.9717	27.2703	9.82205
EVM0006610	1	PREDICTED: pectinesterase 2	114.831	9.60094	8.05897	18.0547	58.7086	21.8656	14.0749	13.183	0.027911	0.471426	0.078291
EVM0013266	1	unnamed protein product, partial	83.9285	29.2911	15.7624	23.4353	17.9858	21.3646	25.0314	25.5037	18.9693	58.9763	20.274
EVM0005341	1	PREDICTED: probable WRKY transcription factor 47	3.60267	0.394521	0.472485	0.050928	0.086629	0.134302	0.123291	0.250764	0.124367	1.88785	0.088696
EVM0003438	1	C2 calcium-dependent membrane targeting [Macleaya cordata]	10.5731	0.446754	2.46985	0.170667	2.51707	2.56577	3.05918	2.94044	0.422015	4.7001	1.98036
Liquidambar_formosana_newGene_7280	1	Function unknown	16.7497	0.0251133	0.229455	0	0	0	0	0	2.03353	5.79819	3.56725
EVM0009492	1	PREDICTED: putative receptor protein kinase ZmPK1	9.62792	1.81012	2.74979	2.6819	1.1119	1.28848	1.09125	1.3053	0.848733	3.34279	1.14839
EVM0007296	1	PREDICTED: nudix hydrolase 8	4.8015	0.124043	0.168204	0.21903	0	0	0.00633433	0.00864367	2.03935	0.66488	0.434907
EVM0009101	1	AUX_IAA domain-containing protein	206.886	4.95975	5.14655	0.814917	2.56046	3.79335	8.20003	14.8276	4.7103	0.473655	1.37615
EVM0013605	1	PREDICTED: tubulin beta chain	102.692	62.826	55.3983	66.6063	37.3155	47.5415	54.3838	56.7469	53.1864	61.3038	66.7693
EVM0027535	1	PREDICTED: probable acyl-activating enzyme 5, peroxisomal	137.006	43.9991	66.2061	61.2823	33.4171	26.6173	19.43	21.8794	85.3217	58.0078	24.5193
EVM0014689	1	uncharacterized protein LOC111991828	3.45492	0.354841	0.080887	0.0378087	0.0217913	0	0	0.0745407	0	0.10454	0.00972533
EVM0014821	1	PREDICTED: uncharacterized protein LOC108982759	32.8105	0.307426	0.555555	0.985147	1.08422	2.99215	1.30219	1.22595	0.24761	1.68823	1.52035
EVM0023280	1	PREDICTED: cytochrome P450 CYP82D47-like	44.1082	2.2637	0.695455	8.71254	0.658359	0.21016	0.185804	0.501644	5.07578	4.52234	6.56998
Liquidambar_formosana_newGene_5685	1	PREDICTED: F-box protein At5g07610-like	4.78743	0.387568	0.497061	0.306099	2.71179	0.318484	0.092873	0.351711	0	0.0114203	0
EVM0011201	1	Chitinase [Handroanthus impetiginosus]	19.1028	0.351632	1.35601	0.058984	1.60893	1.02511	0.426595	0.455068	0.0154637	0.0274217	0.0390763
EVM0004631	1	PREDICTED: protein terminal ear1	13.2292	0.725525	0.342024	0.990556	2.50453	2.22686	1.78611	0.970087	0.0251873	2.65971	0.884777
EVM0004019	1	Spastin, partial [Trema orientalis]	4.62509	0.0633913	0.128457	0.245128	0.044757	0.068919	0.0243733	0.0244387	0.0995023	0.0746187	0.0144527
EVM0009677	1	PREDICTED: dormancy-associated protein homolog 4 isoform X2	86.4899	8.00811	7.12493	19.1997	5.56749	4.17786	2.48801	1.51284	4.01272	26.2568	10.2325
EVM0007668	1	PREDICTED: pectinesterase	141.311	25.8992	8.56385	26.6619	1.43366	1.04057	1.40811	4.78177	3.27097	18.9136	41.0869
EVM0020878	1	PREDICTED: L-type lectin-domain containing receptor kinase IV.2-like	15.5665	0.783401	2.63829	0.956952	0.662564	0.530051	0.399457	0.47491	2.0514	2.04927	2.01198
EVM0019521	1	PREDICTED: L-ascorbate oxidase homolog [Fragaria vesca subsp. vesca]	13.4367	1.14478	0.739309	3.25569	0.540144	0.123093	0.212218	0.199792	0	2.20706	0.032924
EVM0022804	1	PREDICTED: probable membrane-associated kinase regulator 4	9.90323	0.551832	0.342684	1.58404	0.322667	0.336299	0.364722	0.21765	0.109508	0.49547	0.371883
EVM0002217	1	hypothetical protein VITISV_006466	33.7829	12.1086	16.4307	9.54764	2.31834	1.67732	1.01452	1.29706	12.3675	11.8281	3.44019
EVM0000740	1	3-oxo-Delta(4,5)-steroid 5-beta-reductase-like [Durio zibethinus]	14.8267	2.8037	5.61573	3.57986	1.49495	0.65061	0.708075	0.636778	3.46671	4.45517	5.45635
EVM0007426	1	PREDICTED: pectate lyase-like	117.587	0.0226217	1.43945	0	0.0386623	0	0.072394	0.253593	0.158293	1.75031	4.78573
EVM0008364	1	GA20 [Paeonia lactiflora]	31.3872	1.49698	0.191425	0.423293	0.621571	1.17875	2.05663	2.78757	7.52075	1.85004	0.839707
EVM0010083	1	PREDICTED: cysteine-rich repeat secretory protein 12 [Pyrus x bretschneideri]	17.0713	2.2904	5.25319	2.45853	1.90624	1.03063	1.94108	4.00271	1.72284	4.19751	4.77495
EVM0012539	1	PREDICTED: 1-aminocyclopropane-1-carboxylate oxidase homolog 4-like	136.923	42.3184	48.0703	39.3388	10.5159	7.7574	1.70302	1.33411	20.8507	17.7782	28.6698
EVM0026336	1	Auxin-responsive GH3 family protein [Theobroma cacao]	198.913	14.6845	58.9806	16.513	3.82387	1.83038	1.55471	0.549352	0.0168107	1.06895	2.08806
EVM0019811	1	uncharacterized protein LOC110758842	21.4979	5.98055	1.57857	4.52005	0.0562097	0.065623	0.0378657	0.0718467	0.33053	0.954439	1.72357
EVM0014632	1	PREDICTED: uncharacterized protein LOC100249959	43.1105	0	0.264828	0.779512	0.0703907	0.19853	0.609818	2.04766	9.59642	0.543001	2.19528
EVM0023968	1	dof zinc finger protein DOF5.6 [Herrania umbratica]	50.3078	0.0582173	0.586915	0.0620667	0.614144	0.708606	0.875882	1.57673	1.64018	1.1258	4.4603
EVM0013377	1	heat shock cognate 70 kDa protein 2 [Momordica charantia]	14.1861	2.67974	3.21903	1.2231	2.45117	2.82217	2.52327	1.71462	1.74433	2.60076	4.22688
EVM0007794	1	24-methylenesterol C-methyltransferase 2 [Sesamum indicum]	18.7622	3.91087	2.97638	2.96413	3.14509	2.73103	3.22745	4.59826	0.527896	2.45774	5.41723
EVM0015837	1	Cytochrome P450 724B1 [Theobroma cacao]	38.1695	0	0	0	0	0	0	0	0.012846	1.22258	0.126791
EVM0010929	1	uncharacterized protein LOC112006312 isoform X1	39.8121	0.18403	1.43086	0.4982	2.80828	0.283254	0.36474	0.122581	3.01167	0.617429	1.68934
EVM0004194	1	unnamed protein product [Coffea canephora]	3.04869	0.00406367	0.084945	0.119121	0.0798847	0.0386383	0.0969607	0.320588	0	1.80185	0.0850013
EVM0026564	1	PREDICTED: EG45-like domain containing protein	5.66892	1.00616	1.57273	2.60129	0.038033	0.110382	0	0.087081	0	0.783488	0
Liquidambar_formosana_newGene_12333	1	putative NBS resistance protein [Trifolium pratense]	1.0801	0.204234	0.463737	0.253831	0.192225	0.223285	0.409676	0.365701	0.0630117	0.297318	0.378486
EVM0019221	1	PREDICTED: cytochrome P450 71D10 [Theobroma cacao]	8.82603	0.040247	0	0.0903727	0.175724	1.00173	1.01764	1.53776	0.204159	0.191157	1.18651
EVM0002479	1	PREDICTED: glucan endo-1,3-beta-glucosidase 12	141.039	0.0442857	0.0606143	0.08699	1.07686	1.88694	2.72714	2.74096	0.168517	7.81447	28.3122
EVM0014573	1	PREDICTED: wall-associated receptor kinase-like 8 isoform X1	40.2374	0.0513227	0.042262	0	0.187248	0.246273	0.325874	0.177834	0.0183657	1.0977	5.06095
EVM0015865	1	PREDICTED: cytochrome P450 CYP749A22-like isoform X3	26.5941	5.13656	4.36252	2.85604	1.06449	1.33019	1.18063	1.53773	1.85477	7.02456	7.89849
EVM0026766	1	PREDICTED: 60S ribosomal protein L8	694.938	364.925	250.96	303.371	286.417	311.548	293.661	296.853	266.642	427.119	392.865
EVM0008280	1	solute carrier family 25 member 44-like	14.2921	2.19482	4.26407	6.2393	1.62486	1.69237	0.814127	0.719195	0.664589	1.19855	0.935198
EVM0018345	1	PREDICTED: random slug protein 5	3.6271	0.571756	0.354864	0.761145	0.858394	0.883287	0.555719	0.226499	0.0414183	0.480338	0.715988
Liquidambar_formosana_newGene_7667	1	Function unknown	3.59762	1.21835	1.22662	1.26862	0.843698	0.654544	0.763581	0.78668	0.20294	1.01318	0.551498
EVM0025516	1	ankyrin repeat-containing protein BDA1-like	20.0472	1.08408	6.10109	0.964892	0.067096	0.395871	0.118049	0.647102	0.585354	2.74559	2.40086
EVM0025513	1	PREDICTED: uncharacterized protein LOC18603494 [Theobroma cacao]	26.6792	13.8726	8.95068	9.18902	8.60028	9.72665	7.43822	8.18791	8.61947	9.88576	15.1376
EVM0004023	1	PREDICTED: leucine-rich repeat receptor protein kinase MSP1-like	3.33989	1.48697	1.03015	0.853901	0.014568	0.0118353	0.0603327	0.0947787	0.339133	0.197697	1.08319
EVM0016178	1	PREDICTED: secoisolariciresinol dehydrogenase-like	6.18389	0.359493	0.838304	1.41435	0.5662	0.98136	1.33813	2.50968	0	1.54741	0
EVM0009931	1	PREDICTED: cellulose synthase-like protein G2	19.2372	1.84058	1.82237	4.38131	0.501866	0.479536	0.288738	0.241331	0.108541	8.30164	0.249365
EVM0025257	1	xylose isomerase [Jatropha curcas]	252.707	67.9221	89.0202	83.0763	127.471	58.9198	57.2522	46.2374	62.1397	57.4904	62.9391
EVM0020840	1	PREDICTED: germin-like protein subfamily 1 member 13	2349.08	11.9151	109.196	91.4389	16.0867	15.9219	2.47477	2.02981	0.0568503	7.61191	0.569352
EVM0003794	1	protein RALF-like 32 [Manihot esculenta]	13.5787	0.438754	0.990479	1.7924	0.250744	0.32085	0.260084	0.125202	0	3.528	3.63538
EVM0023532	1	Function unknown	9.67187	1.74429	2.3922	1.68919	0.211265	0.16151	0.0269437	0.156794	0	0.880905	0.888323
EVM0020132	1	PREDICTED: zinc finger protein WIP2	20.3421	2.50885	2.69521	5.87635	2.84232	2.50224	1.37705	0.443788	1.07555	1.09471	5.23713
EVM0001796	1	PREDICTED: uncharacterized protein LOC104877974	18.086	0.841521	0.901657	0.319893	3.9676	3.06634	2.08383	1.48686	1.99162	1.6461	2.55571
EVM0026151	1	tubulin alpha-3 chain [Asparagus officinalis]	200.465	122.339	75.5966	104.358	49.0905	69.7643	94.685	99.9977	62.7213	95.5415	83.7616
EVM0000988	1	unnamed protein product, partial	23.0195	3.63495	1.69502	12.0162	0.172839	0.227348	0.200864	0.725818	0	2.20057	0
EVM0011069	1	unnamed protein product [Coffea canephora]	2.87485	0	0	0.0480583	0.079442	0	0.021423	0.01731	0	0.5661	0.522414
EVM0014740	1	PREDICTED: cellulose synthase-like protein G2	18.8353	5.44597	8.81273	3.58537	3.77894	4.09662	3.27148	5.51713	2.80142	5.45822	4.34067
EVM0019133	1	tubulin-folding cofactor D isoform X2 [Cajanus cajan]	1.98553	0.667629	0.738293	0.855474	0.371175	0.234743	0.108206	0.184578	0.165077	0.390068	0.265297
Liquidambar_formosana_newGene_7432	1	Function unknown	56.5192	11.0222	20.6551	2.40315	6.22913	2.68735	2.04932	1.70022	2.14249	12.1221	2.98593
EVM0003501	1	PREDICTED: protein trichome birefringence-like 39	78.7006	18.6792	3.77494	17.4935	1.72929	2.11399	1.92213	2.46941	3.96954	33.1646	8.14186
EVM0015318	1	PREDICTED: auxin-responsive protein SAUR50	33.8263	0.48563	0.725342	0.314327	0.129007	1.04295	0.750041	1.01697	1.16338	0.569474	5.24104
EVM0016039	1	PREDICTED: protein PMR5	18.1379	0.426008	0.666015	0.597583	1.05836	2.06132	2.30131	3.24585	0.786846	0.954249	5.24782
EVM0023936	1	PREDICTED: auxin-responsive protein SAUR50	8.739	0.443516	1.11361	0.335922	0.246388	0.427566	0.546836	0.276746	0.503656	0.11269	1.79093
EVM0025444	1	PREDICTED: uncharacterized protein At5g01610	41.6871	15.7534	10.1912	15.8439	6.2528	4.56137	5.02984	7.75561	14.2347	11.6801	19.9366
EVM0009352	1	PREDICTED: 60S ribosomal protein L27	1270.22	706.641	452.24	410.537	555.957	766.317	643.168	588.218	652.937	618.844	647.646
EVM0008408	1	4-hydroxyphenylacetaldehyde oxime monooxygenase, putative [Theobroma cacao]	7.7636	0.00889033	0.19783	0.050479	0.199866	0.852796	0.976465	1.27559	1.1125	0.220885	0.601256
EVM0027736	1	PTR2 domain-containing protein	10.3975	0.200829	0.260722	0.085562	0.318489	0.192442	0.885684	0.609512	0.110877	1.72373	0.431041
EVM0006060	1	PREDICTED: cytokinin dehydrogenase 1	71.6435	2.67341	3.61307	2.07574	6.16793	3.73394	4.51909	3.81062	0.702164	2.12017	1.80354
EVM0019344	1	Function unknown	727.298	0.262543	1.03287	0.187708	9.03051	39.1925	16.6035	7.31319	0.0777207	17.3346	0.435398
EVM0023600	1	PREDICTED: peroxidase 4	60.318	0.0768327	1.48656	1.02953	0.502103	0.907207	0.398707	0.13773	1.66435	1.13423	1.19623
EVM0023602	1	Cytochrome P450 71D10, putative [Theobroma cacao]	8.73697	0.058555	0.015575	1.25868	0.106894	0.962661	1.15665	1.38747	0.125131	2.84875	1.03653
EVM0004257	1	uncharacterized protein CFP56_34204	3.45869	0.0933227	0.062818	1.37241	0.00699733	0.0389753	0.0130373	0.102705	0.217612	0.0207297	0.364245
EVM0003032	1	probable pectate lyase 12	77.5378	0.0570063	0.164434	0.0721487	0.227309	0.0655683	0.157985	0.192177	0.0361153	0.882205	3.58351
EVM0012293	1	PREDICTED: serine/threonine-protein phosphatase 4 regulatory subunit 3B-like [Lupinus angustifolius]	9.5209	0.599681	0.989988	1.70761	0.717488	0.473125	1.12034	0.833794	0.27026	1.40154	2.41543
EVM0012124	1	Function unknown	708.299	153.162	38.1133	268.987	54.1899	17.3258	39.7763	31.774	0.127016	120.876	3.42279
EVM0005528	1	Function unknown	148.072	1.08463	0.988107	0.581587	3.04049	2.97037	2.59196	1.06973	0.055653	14.5694	0.920729
EVM0014750	1	PREDICTED: protein RADIALIS-like 3	22.3804	0.110151	0.535814	0.193402	0.207148	0.141872	0	0.153016	1.61126	5.63051	3.40883
EVM0028877	1	PREDICTED: uncharacterized protein LOC8263152 [Ricinus communis]	54.123	4.8246	1.20346	4.25866	0.507736	0.138964	0.400327	0.240847	0.016874	0.83889	0
EVM0008052	1	Function unknown	5.53776	1.78092	1.23109	1.1469	0.574819	0.260323	0.352465	0.264104	0	0.359044	0
EVM0007410	1	hypothetical protein POPTR_003G089800v3	26.7559	0.420004	2.77864	0.093413	0.493434	0.64195	0.827098	0.716641	1.85069	1.95896	3.22854
EVM0015531	1	putative disease resistance protein	2.62617	0.392388	0.456023	0.744039	0.170735	0.126293	0.317971	0.577143	0.254898	0.981954	1.26441
EVM0012393	1	isoliquiritigenin 2&apos;-O-methyltransferase-like isoform X2	69.0985	13.0861	14.9387	5.80045	13.9701	14.019	6.71318	4.25505	1.97114	6.06595	11.3641
EVM0017856	1	hypothetical protein VITISV_000223	18.0266	0.820992	1.40263	1.02331	0.104055	0.101694	0.0374803	0.020803	0.209294	4.22838	0.653915
EVM0013324	1	PfkB domain-containing protein, partial	108.124	27.4239	15.515	21.3681	5.73091	7.15099	5.39093	9.70582	18.437	30.3635	40.6821
EVM0013326	1	urease	38.9476	21.8589	20.6854	22.6878	26.0856	16.0092	17.8586	18.6235	15.8078	26.4554	24.3411
EVM0025092	1	PREDICTED: protein Brevis radix-like 4	31.3072	3.8024	0.94954	2.19645	1.44276	2.36578	2.75058	2.99916	1.67972	2.6399	5.97625
EVM0008973	1	PREDICTED: alpha-galactosidase isoform X2 [Theobroma cacao]	4.90255	1.02213	0.182746	0.855883	0.0756187	0.0472017	0.0357687	0.0613437	1.32384	0.465675	0.538517
EVM0019747	1	Function unknown	177.014	88.3541	24.8317	14.6081	0.659362	0.194044	1.0685	1.38789	1.47773	43.7155	65.0487
EVM0019746	1	PREDICTED: protein IDA-LIKE 4	16.3355	0.438697	0.194386	0.62656	0.1181	0.277841	0	0.0443287	0.418472	0.338012	0.698383
EVM0012239	1	hypothetical protein VITISV_025676	6.23568	1.86565	1.68491	1.42891	1.26261	1.44446	1.03571	1.01056	3.68407	1.09364	1.74079
EVM0001811	1	hypothetical protein POPTR_002G190000v3	1085.29	601.544	652.036	471.098	479.632	552.133	422.665	368.185	329.629	609.84	477.138
EVM0006141	1	UDP-glycosyltransferase 73C3-like	13.0109	0.452633	0.63166	2.12113	0.0647843	0.143601	0.170215	0.83187	0.912843	5.89621	2.07064
EVM0010305	1	PREDICTED: basic form of pathogenesis-related protein 1	11.4451	0.664058	3.13747	0.112656	0	0	0	0	0	0.143161	0
EVM0020589	1	PREDICTED: LOB domain-containing protein 4-like [Nicotiana tomentosiformis]	64.4749	2.82299	4.24073	6.4285	0.0251803	0.144501	0.0504267	0.300185	0.102576	2.05772	9.96317
EVM0020581	1	hypothetical protein VITISV_011167	11.133	1.25518	2.09889	0.526276	2.65904	0.73143	1.43387	1.86757	0	0.652227	0
EVM0005406	1	hypothetical protein CUMW_167740 [Citrus unshiu]	11.1741	7.32716	6.82608	6.38408	4.75026	3.70535	6.34978	5.53967	4.77634	6.69421	3.53063
EVM0014377	1	PREDICTED: expansin-A4-like	365.843	37.4247	92.2086	29.3629	3.87892	14.039	4.61066	5.17449	0.964941	15.0767	43.5067
EVM0028951	1	glutathione S-transferase F13-like	13.5562	5.76236	0.711292	2.1603	0.671043	0.269043	0.989305	0.483995	1.34261	4.21758	0.68835
Liquidambar_formosana_newGene_7066	1	PREDICTED: protein argonaute 4A	7.44059	0.341952	0.132902	0.178893	0.0447043	0.00934633	0	0	0.049047	0.147795	0.817931
EVM0021801	1	Auxin responsive SAUR protein [Corchorus capsularis]	23.9902	8.67756	4.01969	5.58233	1.82462	1.29063	1.18642	0.411218	0.722851	7.31009	9.89112
EVM0008263	1	PREDICTED: peroxidase 3	29.2394	2.23163	0.851346	1.35618	0	0	0.201206	0.022232	0	1.09315	0.044037
Liquidambar_formosana_newGene_13918	1	Function unknown	5.20586	0	0.0284363	0.047356	0.0556313	0.05968	0.0910233	0.200076	0.070495	0.045947	0.469887
Liquidambar_formosana_newGene_10268	1	Function unknown	100.449	20.076	32.1345	18.9343	5.99278	5.31324	4.40873	4.43613	2.33334	14.8338	4.61645
EVM0023504	1	PREDICTED: S-adenosylmethionine decarboxylase proenzyme 4	4.19966	0.428683	0.92979	0.0511657	0.55354	1.10022	0.530741	0.34913	0	0.35589	1.36791
EVM0014397	1	PREDICTED: uncharacterized protein LOC18590387 [Theobroma cacao]	15.4349	0	0	0	0	0	0.0548117	0.0562957	0.306421	0.669907	2.27853
EVM0009477	1	beta-glucosidase 12-like isoform X2	1022.11	51.2441	100.213	37.6589	77.7339	23.8112	14.5042	13.1287	0.0108677	1.75074	0
EVM0004921	1	methyl-CpG-binding domain-containing protein 7 isoform X1 [Jatropha curcas]	6.03559	2.20351	2.67117	1.80745	1.46816	1.26992	1.78402	1.50296	3.50044	2.88757	2.96205
EVM0013561	1	PREDICTED: cytochrome P450 734A1-like	42.2648	10.746	3.63385	15.9006	4.00572	2.32581	3.12123	2.95889	3.4761	9.29963	2.52951
EVM0024619	1	hypothetical protein AQUCO_03400152v1 [Aquilegia coerulea]	3.46599	0.560175	0.720335	0.303259	0.350998	0.611833	0.369956	0.606222	0.841641	0.358128	1.31201
EVM0010023	1	protein NRT1/ PTR FAMILY 2.6-like isoform X1	53.2472	8.1782	8.36978	10.7651	0.51873	0.110562	0.0406003	0.316714	0.242228	0.256186	0.319797
EVM0010025	1	lateral root primordium family protein, partial	46.0242	11.0696	13.5668	13.1394	3.97512	2.94656	5.97605	1.37375	0	2.25013	0.96795
EVM0001575	1	hypothetical protein VITISV_042886	9.19779	0.874956	1.08706	0.637396	0.138904	0.123793	0.0813997	0.0628853	2.31614	2.29321	1.02242
EVM0006591	1	PREDICTED: uncharacterized protein LOC18603494 [Theobroma cacao]	34.6687	16.0712	10.4183	12.8668	7.75197	8.38169	5.42074	5.55706	6.66788	9.19775	9.65795
EVM0001906	1	hypothetical protein POPTR_0001s29080g	10.3021	2.24576	1.39953	4.30962	0.480685	0.303413	0.219973	0.234693	0.014859	1.3085	0.057858
EVM0013754	1	auxin early response protein AUX/IAA9	352.091	173.034	87.0361	142.325	80.9851	73.5092	65.8334	73.7635	40.3477	108.731	99.567
EVM0009821	1	serine/threonine-protein kinase STY13 isoform X1 [Morus notabilis]	8.1995	2.50218	0.871106	3.69383	2.11106	1.33013	1.70068	3.9822	1.83449	2.05375	3.6569
EVM0000528	1	auxin-responsive protein IAA4-like	156.393	115.559	90.1407	71.5436	65.2753	52.9664	53.7493	47.6187	87.6987	75.6999	95.5141
EVM0014230	1	hypothetical protein POPTR_003G028200v3	4.57064	0.0774913	0.168388	0.0780867	0	0.0108317	0.053823	0.209909	0.0120757	0.859834	0.0350947
EVM0004526	1	1-aminocyclopropane-1-carboxylate synthase 8-like	17.5481	0.543443	5.59648	0.50245	1.09821	0.795042	0.595382	0.197558	0	2.97389	0.523155
EVM0006380	1	thaumatin-like protein [Actinidia chinensis]	794.43	251.486	203.425	269.243	26.4519	20.9825	11.3119	7.52071	1.48216	49.8766	0.368647
EVM0020162	1	unnamed protein product, partial	17.995	0.3232	0.349091	0.272069	0.805986	0.417503	0.714684	1.27745	0.0728343	0.937042	3.67725
EVM0017954	1	Uncharacterized protein TCM_034761 [Theobroma cacao]	8.66754	0.36786	3.74946	1.36262	0.127268	0.335698	0.0198603	0.076562	0	3.58153	0.107283
EVM0012820	1	PREDICTED: endoglucanase 8-like [Gossypium hirsutum]	96.8693	5.9842	6.04461	3.45163	13.0403	6.75524	11.9417	7.02155	0.416213	2.80916	25.8313
EVM0015441	1	PREDICTED: probable LRR receptor-like serine/threonine-protein kinase At4g26540	18.6657	1.5756	0.384054	2.58303	0.0412773	0.0661323	0.231389	0.447964	1.05404	4.17429	1.57524
EVM0003930	1	hypothetical protein CFOL_v3_09209, partial	9.22311	1.765	0.787487	3.16513	1.40205	0.837179	0.766718	1.67348	0.149918	0.936646	1.48246
EVM0016499	1	PREDICTED: 3-oxo-Delta(4,5)-steroid 5-beta-reductase	50.9017	12.2911	3.12213	8.79243	0.126068	0.247491	0.389811	0.175242	0.0385907	2.88949	0.022798
EVM0016495	1	PREDICTED: peroxidase 24 [Eucalyptus grandis]	69.3949	0.0886097	0	0	0.051796	0.302078	1.52342	0.507437	0	0.191289	0
EVM0016496	1	cytochrome P450 71D10-like	3.44319	0.0832207	0.0153093	0	0.0443727	0.197255	0.254897	0.358964	0.0542617	0.0262187	0.315174
EVM0010377	1	PREDICTED: ethylene-responsive transcription factor ERF003-like	63.0502	2.48956	3.00953	0.69906	0.392442	0.150643	3.66091	1.16013	0.376706	2.15615	1.5652
EVM0010378	1	PREDICTED: receptor-like protein kinase FERONIA	4.79593	1.30207	1.03908	1.80418	0.0553207	0.0588817	0.122367	0.106556	0.309846	0.469672	0.393279
Liquidambar_formosana_newGene_314	1	PREDICTED: uncharacterized protein LOC103957781 [Pyrus x bretschneideri]	5.27411	0.0496127	0.0740963	0.0198667	0.00336633	0.007088	0	0	0	0	0
EVM0025866	1	receptor-like protein EIX2	0.826141	0.045905	0.0345667	0.0420657	0.0805333	0.0790377	0.121272	0.0445783	0.0321177	0.118671	0.017738
EVM0018960	1	hypothetical protein Ccrd_016590 [Cynara cardunculus var. scolymus]	6.82199	3.12642	3.12369	3.65122	1.12576	1.5795	1.48346	2.34242	2.71448	2.27127	4.02001
EVM0027895	1	PREDICTED: protein indeterminate-domain 2 [Theobroma cacao]	19.3974	0.68749	1.37337	0.585542	0.301425	0.466564	1.31551	0.922754	0.0798323	1.947	1.98628
Liquidambar_formosana_newGene_4920	1	DUF4283 domain-containing protein	2.04678	0.082492	0.082595	0.147658	0.0354733	0.0544753	0.0326153	0.0707393	0	0.052157	0.169548
EVM0008456	1	multidrug and toxic extrusion transporter [Vaccinium corymbosum]	15.4254	2.17868	7.25013	7.94768	2.39316	1.88063	0.761218	1.92736	4.01033	3.99001	0.919754
EVM0003763	1	CASP-like protein 4A4 isoform X1	64.7807	12.2336	20.8521	16.5022	23.4288	10.0004	8.59498	6.72875	0.484563	16.9934	0.492753
EVM0024506	1	pollen-specific leucine-rich repeat extensin-like protein 3 [Herrania umbratica]	98.0222	0.78722	0.58156	0.210681	3.07076	1.85349	5.66357	5.01237	1.68707	8.19991	18.4387
EVM0019471	1	PREDICTED: 1-aminocyclopropane-1-carboxylate oxidase homolog 4-like	94.3249	12.6447	8.82695	21.9272	5.01192	7.65185	3.31575	2.78778	2.32968	5.77382	4.94816
EVM0025576	1	hypothetical protein CUMW_019450 [Citrus unshiu]	39.0933	13.3645	19.8082	9.29589	12.4595	12.8631	16.1073	14.2123	9.92389	17.9997	19.7569
EVM0007994	1	PREDICTED: uncharacterized protein LOC100253430	12.2162	0.5676	0.733562	0.315415	0.139086	0.251891	0.349622	0.507465	0.440515	0.547415	3.18923
EVM0010844	1	PREDICTED: dihydrolipoyl dehydrogenase, mitochondrial [Nicotiana sylvestris]	129.385	85.3622	62.5854	80.5992	74.2077	92.5699	71.5065	67.3234	100.671	96.6998	68.1239
EVM0014697	1	homeobox protein HD1 isoform X1 [Herrania umbratica]	109.961	26.8985	40.5939	36.0782	14.5235	18.8182	24.2048	24.7537	51.9095	38.8124	40.1714
EVM0012690	1	PREDICTED: cysteine-rich repeat secretory protein 55	17.013	1.61822	0.617523	0.011759	0.931229	2.30467	3.45262	2.83939	1.91171	0.250325	1.6691
EVM0019781	1	methyltransferase-like protein 23 isoform X1 [Jatropha curcas]	25.2117	14.128	11.5848	12.3611	11.4658	11.2582	14.0357	12.6172	10.7944	14.6098	16.4327
EVM0013784	1	esterase-like	187.994	32.4779	71.9399	97.9296	24.2338	14.461	6.85819	2.81121	17.5087	26.4339	4.20454
EVM0018661	1	trihelix transcription factor PTL-like isoform X1	43.268	0.252503	0.267241	0.105503	0.210909	0.404401	0.662896	1.30904	1.03471	1.68856	9.32392
EVM0018669	1	PREDICTED: glucan endo-1,3-beta-glucosidase, basic vacuolar isoform-like	198.84	2.86347	4.01256	2.86372	42.8301	94.3656	47.6784	47.7059	20.9599	53.276	15.2613
EVM0010789	1	PREDICTED: zeatin O-glucosyltransferase-like	6.68774	0.187037	0.461688	0.517873	0.237946	0.381439	0.081929	0.107997	0.794471	1.15015	0.0102383
EVM0022502	1	PREDICTED: probable glutathione S-transferase	43.0765	1.49877	2.83347	0.305972	2.39645	1.69695	1.2682	1.50576	1.1228	1.01892	3.15416
EVM0028577	1	xanthoxin dehydrogenase	20.9919	8.8049	8.76309	9.00787	7.30403	9.77569	11.4425	12.0637	9.27401	15.9118	12.2287
EVM0023297	1	PREDICTED: glucan endo-1,3-beta-glucosidase 7-like	147.171	24.6181	35.7228	21.4575	7.37107	8.22264	16.3387	28.159	17.8867	15.0254	52.469
EVM0005972	1	PREDICTED: glucan endo-1,3-beta-glucosidase-like [Gossypium raimondii]	14.5253	2.46651	0.823285	1.55309	2.49231	0.990959	1.5368	2.55469	0.294991	2.83561	5.33213
EVM0029358	1	hypothetical protein CCACVL1_30092 [Corchorus capsularis]	17.2614	2.1139	1.57823	0.434544	0.0244907	0.225154	0.0342837	0.344963	0.308448	0.674004	0.365428
EVM0029353	1	auxin-responsive protein SAUR72	5.97794	0.432363	1.85315	0.771937	0.432528	0.126275	0	0.178914	0	0.302039	0.820104
EVM0002281	1	PREDICTED: pectinesterase 2	20.7008	1.19648	0.497808	1.02155	7.83634	3.37825	2.03816	1.54705	0	0.426482	0
EVM0024805	1	PREDICTED: expansin-B3-like	34.1012	13.2404	7.66432	9.11946	1.53848	1.61722	1.00187	1.41853	0.023824	0.754935	11.1483
EVM0009429	1	PREDICTED: serine/threonine-protein kinase CDL1-like isoform X2	99.0638	39.0725	21.8574	32.431	16.0034	15.822	17.307	21.7605	7.27048	31.1963	37.3692
EVM0004914	1	PREDICTED: probable membrane-associated kinase regulator 6	21.9737	2.14468	3.52457	1.90979	4.69381	2.42569	2.22294	2.58654	1.09928	0.808608	3.36759
EVM0017362	1	PREDICTED: GEM-like protein 4	10.1765	0.82046	1.87202	0.748679	2.1623	1.52715	2.01552	1.31316	0.262353	0.225904	0.387891
EVM0014184	1	GEM-like protein 4	8.63912	0.0293853	0.504364	0.100475	0.213816	0.0420217	0.0306897	0.076009	0.110618	0.126448	0.0401257
EVM0015274	1	Flavin-binding monooxygenase family protein [Theobroma cacao]	5.75032	1.33957	0.688333	1.22288	0.310802	0.0434973	0.235941	0.235538	0.43144	0.488063	2.93731
EVM0003362	1	PREDICTED: WUSCHEL-related homeobox 8	73.8704	24.1978	22.8407	22.7616	6.74804	12.606	9.6904	7.50036	4.15681	7.05536	16.7645
EVM0022118	1	dof zinc finger protein DOF2.1-like	50.3166	1.01317	4.36111	3.27127	2.61831	6.08268	7.351	5.26394	1.43159	5.36076	7.95444
EVM0027454	1	PREDICTED: bifunctional epoxide hydrolase 2-like [Prunus mume]	111.312	53.137	45.3021	43.4617	33.8249	27.8952	36.2716	31.0562	19.4878	49.66	35.3273
Liquidambar_formosana_newGene_7035	1	Function unknown	174.24	55.9056	67.8529	45.2638	15.1132	11.917	11.6928	8.35977	8.25942	37.9221	11.5347
Liquidambar_formosana_newGene_14793	1	hypothetical protein TorRG33x02_042570 [Trema orientalis]	3.36065	0.384498	0.203418	0.183935	0.07524	0.048138	0.233722	0.101855	0	0.0359543	0.201086
Liquidambar_formosana_newGene_6818	1	ty1-copia retrotransposon protein [Cucumis melo subsp. melo]	47.8026	5.41884	13.1943	7.44565	1.55082	2.88414	1.74711	1.61097	0.906905	5.44995	2.62335
EVM0009857	1	Cytochrome P450 724B1 [Theobroma cacao]	39.1036	0	0	0	0	0	0	0.0205583	0.0247817	0.994867	0.243225
EVM0000510	1	PREDICTED: bifunctional protein FolD 2	38.2267	22.0614	16.9734	22.0873	17.0832	18.0416	23.5205	18.7043	17.2632	20.921	15.4341
EVM0018873	1	PREDICTED: random slug protein 5	8.01115	1.77765	0.742282	1.84181	1.77032	1.86316	1.62224	0.591477	0.466617	0.641511	1.63331
EVM0026438	1	AUX_IAA domain-containing protein	35.4724	0.0744597	1.94269	0	0.268993	0.533659	0.414956	1.92213	10.6725	6.41632	4.44253
EVM0012134	1	uncharacterized protein LOC110744823 isoform X1	16.4917	5.76051	5.2574	8.21237	3.27306	6.4694	3.90841	5.15272	9.67556	6.24148	9.98135
EVM0009747	1	PREDICTED: uncharacterized protein LOC104606578	134.328	19.3108	22.8794	25.2523	9.29082	13.8623	15.28	14.7273	15.6063	20.2039	36.2295
EVM0006541	1	hypothetical protein POPTR_0017s06850g	73.6342	0.64402	2.30667	2.97644	6.27444	10.4409	16.363	15.7045	2.14117	9.79037	20.5012
EVM0010757	1	PREDICTED: ankyrin repeat domain-containing protein 13C-like	40.1534	6.81564	15.9898	5.06409	2.49864	3.55593	1.58146	2.42405	0.491368	3.15003	7.96433
EVM0015138	1	PREDICTED: probable pectinesterase/pectinesterase inhibitor 59	7.09819	1.8751	0.337178	1.17459	0.192306	0.0541013	0.0872513	0.0942003	0	0.251506	0
EVM0004825	1	protein E6-like protein	776.367	195.085	173.322	68.6946	1.54704	1.15639	1.01702	3.42106	25.216	22.8077	74.37
EVM0005196	1	PREDICTED: alcohol dehydrogenase	1113.06	141.947	77.6541	86.9734	73.7549	42.4743	96.5526	107.628	232.177	331.086	372.772
EVM0026048	1	Homeobox domain-containing protein/HALZ domain-containing protein	82.0705	5.77072	12.4695	3.47175	18.2601	16.4813	18.7705	12.6374	0.188957	3.31517	1.82935
EVM0026049	1	ras-related protein RABA3-like	50.6566	0.15917	0.152153	0.330154	0.391199	0.0853253	0.421662	2.09882	0.0936823	9.34563	10.3139
EVM0022971	1	non-specific phospholipase C6-like [Durio zibethinus]	36.1683	5.67285	12.0131	7.60627	6.36372	10.184	10.0407	9.12871	0.335531	6.2074	6.98293
EVM0022973	1	PREDICTED: heparanase-like protein 3	17.3765	3.48686	7.34199	4.12253	1.67021	2.13864	0.652852	1.05448	3.28578	3.67354	5.39312
EVM0009272	1	acid phosphatase 1	8.30637	0.419474	2.19009	0.513851	0.432944	0.765625	0.212517	1.39854	1.93582	2.20502	2.23126
EVM0006129	1	PREDICTED: uncharacterized protein LOC100267728	7.98299	0	0	0	0.069697	0.0374407	0.0200253	0.243373	0	0.346805	0.007559
EVM0025588	1	PREDICTED: transcription repressor OFP1	22.5108	4.37157	7.59577	8.65046	0.499598	0.399556	0.357802	0.22826	0.541738	1.62305	3.62243
EVM0020253	1	endoglucanase 17-like [Durio zibethinus]	112.351	15.7347	14.7825	10.1799	9.51503	9.83749	7.60586	9.43379	3.15486	9.21013	38.4053
Liquidambar_formosana_newGene_8173	1	Function unknown	3.97173	0.254467	0.538561	0.335535	1.02716	0.182935	0.0343927	0.156565	0.0757787	0.0234957	0.281003
EVM0018935	1	hypothetical protein CFP56_78239	170.224	18.1986	22.854	26.9434	36.2815	17.9135	17.4317	18.0842	24.6865	21.9108	17.4674
EVM0013113	1	GH3 auxin-responsive promoter	1006.99	8.7161	21.0913	9.73008	10.0473	14.8214	11.3921	10.9444	0.0162987	1.42164	1.07591
EVM0023798	1	thaumatin-like protein [Vitis cinerea var. helleri x Vitis riparia]	631.448	25.3425	14.6351	14.2444	173.634	214.615	114.389	92.0829	44.1236	113.908	34.155
EVM0028087	1	PREDICTED: kunitz trypsin inhibitor 2-like	211.977	12.2826	79.5493	15.8225	68.2943	31.1247	14.5504	7.60384	0.0403433	3.71673	0.603167
EVM0006379	1	protein LIGHT-DEPENDENT SHORT HYPOCOTYLS 5 [Prunus persica]	39.5491	11.1484	4.18261	9.74307	2.82594	6.27094	15.7422	18.5229	1.31613	17.1094	10.3505
EVM0010115	1	PREDICTED: uncharacterized protein LOC100267290	7.0408	1.18026	3.93885	0.334254	0.896454	1.28929	0.298581	1.07262	0.241062	2.07074	2.49401
EVM0002703	1	PREDICTED: zinc finger protein WIP3 isoform X1	43.0974	1.47568	6.64216	0.776637	1.7436	1.75424	2.53808	4.09344	4.79698	12.1982	18.6075
EVM0026985	1	hypothetical protein CISIN_1g016373mg	27.2515	12.832	13.0285	2.90271	4.65944	7.72538	8.00698	7.64608	14.9737	7.92436	11.8857
EVM0017157	1	uncharacterized protein LOC110659268	94.7639	71.1846	41.9391	42.9416	44.4664	58.0911	49.5425	52.0944	55.501	56.1673	56.629
EVM0023851	1	PREDICTED: uncharacterized protein LOC103946619 [Pyrus x bretschneideri]	35.6588	2.52364	1.98489	9.03065	2.32237	3.18416	3.44045	2.63142	1.69751	12.7033	9.82881
EVM0023855	1	PREDICTED: auxin-responsive protein IAA31-like [Pyrus x bretschneideri]	3.70221	0.657762	0.145371	0.518391	0.33978	0.090303	0.130474	0.108369	0.382955	0.715675	0.854093
EVM0010324	1	Uncharacterized protein TCM_041702 isoform 1	30.4782	3.76625	3.72283	3.76234	3.04832	2.95626	3.75542	5.23252	0.539041	2.26463	8.03704
EVM0015205	1	PREDICTED: glu S.griseus protease inhibitor-like	93.6082	1.381	8.7541	3.15897	28.4983	10.6235	2.12106	1.04478	0	0.0586937	0
EVM0004141	1	PREDICTED: uncharacterized protein At4g06744 [Eucalyptus grandis]	9.25339	0.532711	0.754156	0.807115	0.19457	0.124326	0.42593	0.699066	0.31548	0.0366783	0.310629
EVM0004146	1	hypothetical protein CISIN_1g043005mg	119.247	0.411928	0.12638	0.874487	0.10624	0.0401913	0.375485	0.289522	0.0468477	4.67904	18.051
EVM0022143	1	receptor-like protein kinase 2	37.4391	4.58227	1.38385	7.97179	2.86421	2.21254	5.58337	6.77923	0.042574	3.91458	2.23866
EVM0000624	1	basic form of pathogenesis-related protein 1-like	45.5121	0.0768877	0.06871	0	0	0.0161173	0.0435453	1.18343	0.627823	2.76695	1.02656
EVM0008822	1	hypothetical protein VITISV_015121	18.52	1.08811	6.11671	2.28838	3.61676	2.68373	0.921221	0.22503	0	0.610071	0.059318
EVM0009691	1	LOW QUALITY PROTEIN: patellin-3-like [Herrania umbratica]	221.829	24.8457	17.906	49.7206	9.86284	10.476	11.7863	11.2293	7.68336	60.0663	56.1601
EVM0002789	1	vacuolar invertase [Rhus chinensis]	12.604	2.50439	3.33641	1.49463	0.860322	2.38401	0.505563	0.652662	1.85572	6.34447	3.66338
EVM0005259	1	PREDICTED: auxin-responsive protein IAA16-like	74.2684	22.0288	26.729	31.5057	4.99949	1.70952	7.95894	16.8509	18.9338	1.12915	12.9204
EVM0025035	1	probable peroxidase 61 isoform X1	25.0962	5.61912	1.94617	3.95666	3.40209	1.30932	1.51583	1.05951	0.113398	1.35662	0.248866
EVM0028317	1	PREDICTED: leucine-rich repeat receptor-like tyrosine-protein kinase PXC3	29.3463	0.547462	1.6247	2.41492	1.59629	1.53955	1.16467	2.02422	1.22508	3.01084	11.3944
EVM0001787	1	PREDICTED: expansin-A8-like	94.1619	1.0942	6.34593	3.54076	0.379966	1.2684	0.671566	1.37527	0.806729	0.997533	2.58632
EVM0000995	1	PREDICTED: uncharacterized protein LOC8275314 [Ricinus communis]	28.8716	5.0762	5.39053	7.1699	5.63632	2.55286	8.58207	6.71567	0	4.33225	0.777741
EVM0021419	1	uncharacterized protein LOC106756733 [Vigna radiata var. radiata]	74.854	29.4776	14.3199	19.8716	26.4022	33.8047	33.7276	30.8376	28.8925	35.0577	13.9856
EVM0007623	1	PREDICTED: uncharacterized protein LOC103946619 [Pyrus x bretschneideri]	10.068	0.18978	0.135552	0.776911	0.213391	0.731053	0.46888	0.160573	0.791372	5.23385	0.330623
EVM0017058	1	PREDICTED: probable N-acetyltransferase HLS1 [Ricinus communis]	129.558	10.2281	19.4024	2.73078	0.849537	1.10302	1.59792	1.64482	0.423551	4.28963	3.81405
EVM0026688	1	cytochrome P450 CYP72A219-like [Durio zibethinus]	4.89478	0.257319	0.433723	0.103228	0.312273	0.0394547	0	0	1.06696	0.0490233	0.761004
EVM0005823	1	endoglucanase CX-like [Durio zibethinus]	811.807	226.763	262.072	56.7216	1.60011	0.957351	0.716068	1.09667	0	2.57974	0.767692
EVM0013077	1	PREDICTED: cysteine-rich repeat secretory protein 38	38.4807	4.34358	13.3554	2.36888	2.41324	1.76162	0.420775	0.491933	0	5.32207	0.124987
EVM0003376	1	PREDICTED: uncharacterized protein LOC109000452	103.993	46.8085	13.8166	30.9353	21.9373	9.74554	8.40941	14.9556	0.774851	20.5731	48.3179
EVM0013273	1	basic form of pathogenesis-related protein 1-like	73.5263	0.357533	3.09869	0.261574	0.0183657	0.036857	0	0.599523	0.200712	2.65494	0.681656
EVM0009800	1	PREDICTED: uncharacterized protein At5g01610-like [Gossypium arboreum]	9.75278	2.5669	3.97963	3.96551	3.82974	2.75865	2.99961	3.34147	1.33855	6.38827	1.944
Liquidambar_formosana_newGene_7206	1	Function unknown	90.6114	15.4427	36.2095	18.5215	5.98058	1.80151	1.42158	2.7172	10.5704	21.8078	6.09588
Liquidambar_formosana_newGene_14394	1	Function unknown	2.74015	0.114145	0.180805	0.150052	0.313353	0.569388	0.386201	0.423999	0	0.082396	0.355918
EVM0015461	1	Protein kinase domain [Macleaya cordata]	3.1743	0.77978	1.40088	0.669109	0.216	0.185954	0.324166	0.32631	0.272957	0.617474	1.39025
EVM0019971	1	PREDICTED: thaumatin-like protein	25.3469	0	0	0	0.013463	0	0.0354473	0.044542	0	0	0.739446
EVM0026448	1	Transcription factor TGA like domain [Macleaya cordata]	11.8898	1.22974	0.625928	0.508484	0.18726	0.113016	0.193436	0.0506993	0	2.7774	1.33613
EVM0001662	1	PREDICTED: protein terminal ear1	18.0882	0.170346	0.0437573	0.300934	0.842781	0.48313	0.830658	0.386149	0.022083	2.35731	0.935931
EVM0002782	1	ubiquitin thioesterase OTU1 [Jatropha curcas]	13.3052	5.09815	5.61206	6.64372	5.21391	5.3631	5.14748	5.26125	6.76307	6.70044	4.86165
EVM0005351	1	strigolactone esterase D14	59.4189	9.59195	0.670664	9.21912	6.59308	8.73401	3.96099	2.40978	14.226	5.68916	0.629978
EVM0010492	1	PREDICTED: dof zinc finger protein DOF4.6-like isoform X1	140.657	14.6366	33.97	19.7232	10.6624	14.5612	16.3436	16.6897	5.13866	41.5937	46.2344
EVM0025108	1	G-type lectin S-receptor-like serine/threonine-protein kinase CES101 isoform X2	5.64221	1.74779	3.04636	3.1211	1.86018	1.92008	1.70356	2.30932	1.91398	2.27329	2.09685
EVM0001149	1	PREDICTED: protein ASPARTIC PROTEASE IN GUARD CELL 2 [Ricinus communis]	25.9683	1.15699	9.46767	0.352013	2.73798	1.41741	2.51138	1.33521	0.452109	0.268683	7.67943
EVM0013331	1	hypothetical protein CRG98_033912 [Punica granatum]	7.47305	0.739212	1.43185	2.39402	0.892395	0.884314	0.161579	0.208734	0.0220353	0.548933	0
EVM0025313	1	PREDICTED: probable aminotransferase ACS12 isoform X2 [Prunus mume]	12.2195	6.74255	4.98477	6.60578	3.57352	5.13874	4.80394	5.71924	6.76395	6.65032	5.73861
EVM0003397	1	PREDICTED: isoeugenol synthase 1-like	3.87614	0.032365	0.542522	0.313729	0.0410143	0	0.021394	0.0663593	0.730661	0.891784	1.40732
EVM0007757	1	PREDICTED: 21 kDa protein	35.6857	7.24776	2.2777	0.075189	0	0	0.0307963	0.0951517	2.13208	0.0250757	0.119644
EVM0007281	1	PREDICTED: protein TORNADO 2-like	81.0122	4.93983	2.88262	1.07197	0.31421	0.195548	0.75728	0.715435	0.897803	9.41198	18.3901
EVM0006159	1	PREDICTED: pectate lyase-like	47.9072	0.142667	2.11777	0.0448177	0.0383987	0.0511183	0.0467683	0.557499	0.044357	1.48029	4.81643
EVM0029419	1	S-receptor-like serine/threonine-protein kinase [Trema orientalis]	2.63116	0.273566	1.18345	0.348088	0.721446	0.61424	0.42437	0.635603	0.449103	0.378429	0.112417
EVM0015096	1	PREDICTED: BTB/POZ domain-containing protein At5g48800 [Ricinus communis]	29.7323	1.82837	2.53258	1.11902	0.694039	0.7325	0.80276	0.831682	0.747901	2.2008	5.65355
EVM0027294	1	PREDICTED: extracellular ribonuclease LE-like [Pyrus x bretschneideri]	13.4578	0.675211	0.731438	2.25957	2.19532	5.98075	4.56281	2.65869	0.417232	4.52892	0.603822
EVM0026525	1	PREDICTED: uncharacterized GPI-anchored protein At4g28100	22.2372	0.998423	3.29253	2.40066	3.2055	5.49707	3.33717	3.86233	0.251866	3.04626	8.92023
EVM0020804	1	F-box/kelch-repeat protein At1g51550	6.688	2.81031	1.63365	0.840014	1.09004	2.07759	2.15816	2.96388	2.8954	0.920055	2.75306
EVM0019592	1	expansin-B15-like [Herrania umbratica]	32.7452	3.76868	0.454007	4.47182	0.107954	0.0594767	0	0.0835583	4.05379	4.1544	9.4132
Liquidambar_formosana_newGene_6321	1	Function unknown	12.6337	1.39618	0.333231	0.145087	0.546981	0.760898	1.05333	0.265345	0.424834	0.390408	0.304987
EVM0021220	1	PREDICTED: probable pectinesterase/pectinesterase inhibitor 59	4.72497	1.28774	0.125941	0.895633	0.0612053	0.00921	0.0864267	0.111221	0	0.108044	0
EVM0023578	1	PREDICTED: transcription repressor OFP4	9.10427	2.01554	0.93976	1.61003	0.0557053	0.058648	0.109022	0.126923	0.103484	0.284373	0.55478
EVM0000001	1	PREDICTED: ensconsin isoform X1	57.3974	30.976	35.1704	30.9608	34.5089	34.7756	35.9595	31.455	32.7391	31.4476	31.5959
Liquidambar_formosana_newGene_12728	1	Function unknown	145.968	16.3039	36.505	28.0497	6.76708	7.55069	7.97664	6.75709	7.12915	28.6589	11.8893
EVM0024608	1	PREDICTED: alpha-mannosidase isoform X1	2.54646	1.00123	0.951131	0.958503	0.718026	0.583063	0.346418	0.615409	1.11652	0.980699	1.30179
EVM0014707	1	PREDICTED: cysteine-rich receptor-like protein kinase 19 isoform X3	2.06855	0.12135	0.987194	0.128313	0.0256427	0.307643	0.0338813	0.472136	0.00749667	0.159048	0.0363403
EVM0027982	1	cytochrome P450 82C4	13.873	3.87452	2.2359	9.19457	1.81425	1.40211	2.08712	2.83402	1.2763	3.19431	2.16585
EVM0016732	1	F-box protein At3g07870-like [Herrania umbratica]	3.58134	0.945845	0.41344	0.602066	0.212724	0.182928	0.123156	0.179489	0.068205	0.295048	0.434609
EVM0010234	1	PREDICTED: auxin-responsive protein IAA31-like [Pyrus x bretschneideri]	8.36293	0.175424	0.300143	0.0618623	1.53642	1.12003	2.12139	3.29535	0.608424	1.35761	0.699309
EVM0012353	1	transcription factor bHLH106 [Herrania umbratica]	75.0667	3.54818	3.28066	2.47986	6.43902	12.4785	11.6516	15.6106	3.60832	7.99918	12.4399
EVM0006398	1	GDSL esterase/lipase 1-like isoform X1 [Durio zibethinus]	33.5129	1.58079	4.02474	0.395421	3.09913	2.62922	0.82588	0.59797	0.224851	0.05966	0.102575
EVM0006393	1	PREDICTED: LRR receptor-like serine/threonine-protein kinase GSO1	3.80863	0	0.042314	0.0409437	0	0.00479667	0.0171033	0.294368	0	0.624564	0.0119397
EVM0006027	1	putative disease resistance protein At1g50180	7.63577	0.702967	0.193639	0.91536	0.355854	1.50197	1.94335	2.75494	1.29024	0.994615	2.24548
EVM0020172	1	inositol oxygenase 1-like	199.402	30.2771	57.4113	38.5546	30.573	3.62613	8.08946	16.064	0.617502	41.3148	8.67303
EVM0008350	1	PREDICTED: uncharacterized protein At1g08160	2.57589	0	0.148963	0.218978	0.295638	0.099524	0.143876	0.564129	1.12657	0.520522	0.335024
EVM0012968	1	F-box only protein 11-like	25.9492	1.94727	1.00254	4.58368	0.0875353	0.0987793	0.084914	0.229956	0	0.573645	0.442714
EVM0015781	1	hypothetical protein CDL15_Pgr027553 [Punica granatum]	31.8041	0.206911	0.313619	0.0625807	0.105313	0.0584617	0.0915043	0.0959967	0.0807827	0.223325	0.14047
EVM0013690	1	unnamed protein product, partial	1.29899	0.212808	0.243331	0.298678	0.179835	0.143309	0.263704	0.174026	0.0791073	0.240513	0.498937
EVM0013693	1	PREDICTED: potassium transporter 5-like	15.1981	2.0606	1.1081	6.10582	0.2007	0.0931433	0.0657083	0.034149	0.00744733	2.3912	0
EVM0009725	1	PREDICTED: 18.5 kDa class I heat shock protein-like	100.785	23.5684	41.5358	19.0788	70.8298	23.7714	13.4128	9.41603	42.3717	8.55265	27.8099
EVM0027125	1	PREDICTED: probable glutathione S-transferase	13.5982	4.30433	2.61614	2.37075	1.70324	2.22638	1.65612	1.83143	3.62702	3.70115	1.59639
EVM0005363	1	crocetin glucosyltransferase, chloroplastic-like	117.052	26.4551	24.284	37.2582	3.71456	3.61636	1.76717	1.27692	2.6565	21.2059	5.03252
EVM0010696	1	heavy metal-associated isoprenylated plant protein 39 isoform X1	96.923	9.45082	12.4983	1.27066	19.9541	31.451	26.2399	35.4257	20.1333	8.36823	20.8609
EVM0003227	1	PREDICTED: U-box domain-containing protein 52	3.75431	0.5464	1.04162	0.63028	0.689502	0.637571	0.333568	0.707474	0.139855	1.90463	0.955938
EVM0027241	1	Major facilitator superfamily protein [Theobroma cacao]	12.2145	3.10755	0.735949	2.99224	1.74957	1.60496	2.36861	2.68047	0.166425	5.56247	5.67532
EVM0018140	1	PREDICTED: cinnamoyl-CoA reductase 1	6.83195	3.22479	2.36862	3.91073	1.81469	1.87803	1.93734	2.93455	1.66675	1.89971	4.22284
EVM0015112	1	PREDICTED: protein ABHD17B [Theobroma cacao]	30.7834	9.55684	6.15074	9.72509	7.18523	9.1657	8.78773	9.54009	6.69741	7.93053	12.2577
Liquidambar_formosana_newGene_6008	1	hypothetical protein PRUPE_8G035600 [Prunus persica]	36.1344	1.10656	0.745692	0.839863	1.59227	0.62245	0.0367947	0.172149	0	2.27234	0
EVM0018730	1	PREDICTED: uncharacterized protein LOC100262430	3.57833	0.382067	0.854351	0.382633	0.451849	0.466015	0.246893	0.422508	0.00739267	0.058095	0.0641253
EVM0025560	1	unnamed protein product, partial	74.4088	15.4494	17.2473	16.7411	4.37734	6.50339	4.54918	9.71176	0.150411	3.66172	18.7799
EVM0020231	1	PREDICTED: germin-like protein subfamily 1 member 17 [Ricinus communis]	175.745	0.432047	10.3443	9.61569	1.24438	1.44801	0.119619	0.04166	0	0.35373	0.0203717
EVM0018484	1	hypothetical protein CUMW_069350 [Citrus unshiu]	20.1752	0.245113	1.2861	0.368161	1.27979	4.363	2.21888	0.84886	1.83132	2.90684	0.352714
EVM0001350	1	PREDICTED: short-chain dehydrogenase TIC 32, chloroplastic	225.201	1.58986	2.52065	3.23773	1.16162	0.693749	1.0595	1.93441	2.26901	16.808	3.07766
EVM0011899	1	uncharacterized protein LOC111999137	15.1321	10.2077	10.3605	8.81984	6.14877	7.13498	7.76007	6.84065	8.38861	7.89477	11.5903
EVM0025150	1	hypothetical protein VITISV_015121	12.3812	0.827468	5.42191	1.91666	3.97679	2.19848	0.705304	0.132709	0	1.26452	0.0308503
EVM0014487	1	PREDICTED: probable indole-3-acetic acid-amido synthetase GH3.1 isoform X2 [Theobroma cacao]	14.5907	1.86243	1.03153	0.0895277	0.538679	0.667244	0.392628	0.356603	0	0.200567	0
EVM0004616	1	PREDICTED: probable pectate lyase 5	321.637	30.2497	98.3106	34.4991	0.539666	1.45696	0.300912	1.02204	0.21861	1.92634	3.77124
EVM0010632	1	Polypyrimidine tract-binding protein 3 [Theobroma cacao]	41.3178	26.6008	24.8212	26.1992	23.1918	18.0056	19.4751	17.2237	24.7795	25.4708	24.5663
EVM0021579	1	cytokinin dehydrogenase 5 [Prunus persica]	90.3204	0.396149	3.68739	2.26681	0.616973	0.663306	0.952233	0.898743	0.209312	10.1143	0.170855
Liquidambar_formosana_newGene_11637	1	esterase-like	7.00772	1.32384	3.17263	4.08982	1.47987	0.882995	0.300034	0.176431	2.88532	1.58304	0.5069
EVM0004964	1	acetylserotonin O-methyltransferase-like	26.2123	1.0739	1.38415	1.54391	1.09518	0.674254	3.09007	1.34365	0.278906	13.6422	2.58036
EVM0017370	1	SKP1 component [Macleaya cordata]	31.9459	6.21841	6.80058	8.10783	4.61028	3.60012	5.98038	5.35286	7.09382	6.52236	13.117
EVM0020541	1	21 kDa protein-like	59.878	20.8246	12.3249	19.4705	6.48133	6.94618	4.39534	3.83774	1.66211	8.79786	16.8745
Liquidambar_formosana_newGene_13878	1	Function unknown	105.159	19.6882	50.1904	39.0946	7.08454	7.68264	4.61039	4.31638	10.3591	27.2424	9.42769
EVM0016104	1	PREDICTED: protein RAE1	9.26831	4.59086	4.0909	2.01854	2.55279	2.91831	2.36505	1.10426	1.48574	4.76325	3.99551
EVM0023072	1	gibberellin 2-beta-dioxygenase 2	13.3984	0.830174	2.75076	2.16464	2.87992	2.6499	4.02423	1.97156	0.098525	9.06416	5.81854
EVM0015061	1	PREDICTED: inorganic pyrophosphatase 2 [Theobroma cacao]	70.158	0.421324	8.67514	0.118588	32.4137	7.87781	6.37439	10.3383	21.7517	1.09419	5.55065
EVM0004336	1	Function unknown	407.406	48.9169	9.01935	45.4541	20.4959	34.148	16.2499	6.91802	0.177144	2.93606	0.334296
EVM0004481	1	hypothetical protein POPTR_0005s01070g	3.3849	1.13794	1.65226	1.38174	0.0258613	0.0591067	0.292263	0.318631	0.651905	0.72581	0.837204
EVM0012048	1	nodulin family protein	7.05567	0.639962	0.405227	1.30507	1.21262	0.828754	0.296485	1.03103	0.110002	0.639396	0.0649547
EVM0012041	1	formate--tetrahydrofolate ligase	84.5221	65.1152	68.1169	45.8699	53.7033	51.3862	57.8817	65.2932	55.0136	57.1939	55.0979
EVM0026847	1	PREDICTED: probable serine/threonine-protein kinase At4g35230 [Prunus mume]	9.66018	3.89179	2.16139	2.95223	2.79418	3.50366	4.06485	4.41221	4.57726	3.61616	5.18103
EVM0013069	1	PREDICTED: protein UNUSUAL FLORAL ORGANS [Theobroma cacao]	18.068	4.24333	1.45811	2.31411	1.15038	1.39875	0.795416	0.799289	0.734511	3.86109	2.1307
EVM0016127	1	hypothetical protein POPTR_0003s07460g	8.65074	0	0.036668	0	0.348556	0.165894	0.333342	0.886829	0	0.148198	0.681063
EVM0000564	1	PREDICTED: ELMO domain-containing protein A isoform X2	16.9364	0.28947	0.626175	0.350364	0.650055	0.570583	0.544533	0.434747	0	1.0893	2.6372
EVM0017280	1	polyol transporter 5 [Morus notabilis]	9.06462	4.75246	4.36093	3.6519	2.9884	2.01584	1.38672	1.49594	3.46251	3.94196	2.79419
EVM0017285	1	strigolactone esterase D14	85.855	6.35743	0.797121	8.26297	6.8243	11.6261	5.26391	4.03162	31.2962	4.70035	1.40353
EVM0013908	1	PREDICTED: uncharacterized protein LOC100247341	5.58001	1.52997	0.604473	0.878183	0.574539	0.555554	0.590671	0.121588	0.0180157	0.373472	0.495412
EVM0011503	1	PREDICTED: peroxidase 3	22.0032	2.65264	4.35925	3.94918	0.233897	0.0822343	0.114314	0.105405	0	1.4452	0
EVM0025949	1	PREDICTED: germin-like protein subfamily 1 member 13 [Ricinus communis]	95.3049	2.44792	5.80412	9.32404	4.21185	2.22533	0.574018	0.384915	0.0242867	9.24676	0
EVM0005078	1	hypothetical protein POPTR_002G254500v3	14.1689	9.78873	5.089	6.76272	6.11568	6.69867	7.32587	7.67315	6.8309	8.82022	6.41317
EVM0000263	1	3-oxo-Delta(4,5)-steroid 5-beta-reductase-like [Durio zibethinus]	56.9843	15.9587	10.6824	17.3155	5.4379	3.10671	2.61352	1.98273	5.95631	6.2107	1.25994
EVM0009774	1	PREDICTED: probable prolyl 4-hydroxylase 9	25.787	15.7675	14.2363	9.09174	8.05438	9.96049	7.37921	7.92902	10.9829	14.4997	12.4804
EVM0010266	1	non-cyanogenic beta-glucosidase precursor, partial [Oryza sativa Indica Group]	2.62698	0.0735797	0.3563	1.19263	0.021803	0.0128633	0	0.020918	0	0.031905	0.08622
EVM0028589	1	PREDICTED: chaperone protein dnaJ 20, chloroplastic-like isoform X1	284.819	58.4666	44.9341	35.2249	70.2468	44.1538	66.8435	50.4908	9.59939	46.1144	21.6065
Liquidambar_formosana_newGene_5373	1	PREDICTED: 2-hydroxyisoflavanone dehydratase	11.7432	1.23946	5.84257	1.77814	0.207601	0.49522	0.0300447	0	0	2.31053	0.226191
EVM0005768	1	PREDICTED: uncharacterized protein LOC104587937	110.491	25.8077	17.0719	38.4252	18.3242	5.9702	4.74411	4.18509	20.1963	3.33672	3.5247
EVM0007859	1	hypothetical protein JCGZ_18643 [Jatropha curcas]	62.967	10.7543	22.432	30.0789	19.5039	9.96312	7.71058	7.49599	8.66782	6.44139	7.58256
EVM0016612	1	dCTP pyrophosphatase 1-like	22.7922	1.64605	1.44817	0.779374	0.492993	1.25237	0.487863	0.918661	0.19414	0.362904	5.32593
EVM0017502	1	PREDICTED: protein LURP-one-related 5	17.1384	0.517183	1.17115	0.154566	1.60701	0.524175	0.501221	0.28191	0.317549	0.379861	0.78888
EVM0014855	1	beta-amyrin 28-oxidase [Herrania umbratica]	38.9805	11.9945	8.45941	1.59457	0.494643	2.44663	1.5736	1.81497	18.8282	4.95894	8.33891
EVM0011623	1	hypothetical protein VITISV_021166	16.0912	0.827952	3.88567	0.316972	0.0593957	0	0	0.130705	0.059743	0.337275	0.0467167
EVM0015815	1	uncharacterized protein LOC111276662 [Durio zibethinus]	37.6993	2.33224	0.359539	1.77025	3.31475	6.0513	4.34725	5.12697	0.378962	3.81013	6.60475
EVM0000154	1	SPX domain-containing protein 3-like	29.658	1.16368	8.57599	0.0583453	7.51256	6.57266	5.3285	2.22355	0.205146	0.47747	0.225558
EVM0026623	1	PREDICTED: protein trichome birefringence-like 42	34.0679	6.18934	7.28067	6.50627	3.82662	4.10813	5.22285	4.91714	1.1511	1.56264	2.71101
EVM0004454	1	PREDICTED: probable root meristem growth factor 8	38.8912	6.27944	6.69186	2.86259	2.8018	1.29614	3.87817	1.36261	0	1.00488	0.841
EVM0013296	1	inactive protein kinase SELMODRAFT_444075 [Prunus persica]	2.55486	0.302328	1.08735	0.311601	1.22312	0.782427	0.355071	0.252266	0.622454	0.204171	0.538035
EVM0023252	1	PREDICTED: protein ABHD17B isoform X2	8.94321	0.791822	0.301125	0.314139	0.412437	0.127485	0.289376	0.268127	0.214143	1.06745	1.93037
EVM0005107	1	cytokinin riboside 5&apos;-monophosphate phosphoribohydrolase LOG1	43.03	0.672032	0.883307	0.78489	0.466355	2.20388	1.25277	0.896586	4.14323	0.253612	1.93818
EVM0011275	1	hypothetical protein CISIN_1g036911mg	28.1052	8.73749	4.40024	4.23849	1.77107	2.23998	2.7202	1.55968	0	1.82699	1.91236
EVM0003190	1	PREDICTED: kinesin-like protein KIN-14G	3.78477	0.911323	0.823735	0.527708	0.91735	0.667126	0.518254	0.747427	0.194455	1.04892	1.4296
EVM0003198	1	conserved hypothetical protein [Ricinus communis]	6.04362	0.918886	2.21294	0.386274	0.241193	0.500857	0.331612	0.449275	0.0615803	0.121932	0.025546
EVM0005935	1	PREDICTED: pathogen-related protein-like	52.7094	11.2665	7.61645	7.76432	3.06471	1.7416	0.555619	0.438004	2.86925	11.1384	0.201794
EVM0014401	1	cytochrome P450 CYP72A219-like [Durio zibethinus]	4.4163	0.271403	0.704058	0.084801	0.157969	0.0403213	0.0792073	0.031151	0.422024	0.132674	0.605569
EVM0013310	1	PREDICTED: uncharacterized protein LOC8288025 [Ricinus communis]	36.4995	7.13648	7.42433	9.92461	3.72358	5.4727	1.53669	1.52605	0.368295	2.59208	6.75874
EVM0024061	1	peroxidase 17-like [Durio zibethinus]	106.74	2.34379	2.60846	3.37614	1.41386	1.9458	3.03315	5.01698	9.50492	9.8544	9.74419
EVM0023962	1	PREDICTED: peroxidase 4-like	69.241	5.89122	37.0054	2.61124	15.3883	27.7585	8.04765	2.32503	0.165775	19.8994	0.793307
EVM0006968	1	40S ribosomal protein S16 [Jatropha curcas]	104.894	58.502	48.6005	48.4931	36.8306	50.3409	38.8647	34.784	31.8167	55.7946	43.1756
EVM0006677	1	endochitinase EP3	1116.79	198.421	162.185	81.1334	78.915	121.502	33.1171	30.6124	4.40181	7.88984	7.75113
EVM0016464	1	PREDICTED: protein SRC2 homolog	36.5671	5.65604	4.36556	2.27095	3.12244	2.9103	3.61246	3.53522	2.19125	5.17962	11.2421
EVM0024665	1	PREDICTED: bark storage protein A-like	2.07946	0.46607	0.480987	0.871912	0.12254	0.300365	0	0.145638	0	0.857693	0.225993
EVM0025278	1	tropinone reductase homolog At2g29170	13.2055	1.52989	2.66452	3.68374	0.629384	0.518436	0.400831	0.669484	0.393852	1.15203	1.34154
EVM0021940	1	PREDICTED: zinc finger protein WIP6	5.01926	0.807921	0.775261	1.31827	0.50448	0.533333	0.306338	0.298221	0.274251	0.0327633	0.548428
EVM0006271	1	acetylserotonin O-methyltransferase-like	4.22097	0.559236	0.516516	0.775802	0.0291203	0.0409073	0.083863	0.0209193	0	0.941275	0.390984
EVM0011742	1	UDP-glucuronic acid decarboxylase 6-like isoform X1	688.002	156.735	265.86	138.958	111.546	35.7203	30.3256	24.3341	25.6909	77.0539	96.9899
EVM0015910	1	polygalacturonase At1g48100 [Prunus persica]	158.263	17.0801	54.7818	14.0321	0.344361	0.160535	0.119151	0.360378	0.014008	0.273602	2.13174
EVM0008857	1	polygalacturonase-like	17.3652	3.69479	2.12883	5.76759	0.0295913	0.043143	0.076699	0.122911	0	0.174244	0.15341
EVM0015643	1	peroxidase A2-like	477.609	196.487	152.037	71.9386	1.09247	0.317577	0.66613	1.51189	0.142285	6.43108	5.05646
EVM0017604	1	PREDICTED: putative UDP-rhamnose:rhamnosyltransferase 1	3.83718	0.295417	0.422256	0.235177	0.193913	0.141945	0.222191	0.113764	0.414094	1.46428	1.0884
EVM0007318	1	PREDICTED: aspartic proteinase nepenthesin-1	8.74866	2.6693	4.48751	1.40293	0.431361	0.704786	0.49154	1.99269	3.47124	1.33861	1.399
EVM0018011	1	PREDICTED: filament-like plant protein 4	20.2238	6.9584	4.04582	5.84472	0.423194	0.245892	0.270353	0.473514	5.13412	2.90336	6.11181
Liquidambar_formosana_newGene_7386	1	putative disease resistance protein RGA3	27.562	9.74775	16.0261	18.3021	12.5469	10.6512	9.95187	14.7794	8.87381	10.874	16.9545
EVM0023400	1	uncharacterized protein At4g38062-like	2.54274	1.37018	0.489534	0.94887	0.582273	0.28555	0.275948	0.350788	0	0.224224	0.832232
EVM0021205	1	PREDICTED: F-box only protein 6	62.3956	28.1316	17.5444	18.8797	17.7889	26.4975	29.0253	27.4173	23.4849	23.9397	18.5635
Liquidambar_formosana_newGene_8367	1	PREDICTED: developmentally-regulated G-protein 3-like, partial	41.1484	5.64656	4.65104	4.73642	5.46631	10.4058	9.92879	7.95595	3.68759	7.60389	6.17311
EVM0006091	1	hypothetical protein VITISV_000145	11.5601	0.335012	0.120763	0.189677	1.85418	3.23603	3.16956	2.02748	0.026845	0.319842	1.748
EVM0004045	1	cytochrome P450 CYP72A219-like [Durio zibethinus]	11.4254	1.09005	1.72172	0.917464	0.833543	0.307767	0.0507343	0.087653	1.1431	0.266116	1.92472
EVM0003099	1	PREDICTED: scarecrow-like transcription factor PAT1	33.5078	9.41489	13.0204	18.0253	3.95979	5.16778	6.33725	9.278	1.19578	9.56142	11.1519
EVM0010582	1	PREDICTED: omega-hydroxypalmitate O-feruloyl transferase	8.23519	1.94703	4.3864	1.66575	3.63497	1.80364	2.30769	2.08302	1.15774	2.88383	2.207
EVM0017607	1	uncharacterized protein LOC112036127	25.1837	0	0.0196593	0	0.230309	0.308325	0.305277	0.196556	0.030509	0.651894	2.97039
EVM0008785	1	hypothetical protein CFP56_64516	89.9017	0.371968	1.63679	0.0493117	0.771941	0.935301	1.24299	1.1325	4.73393	13.9254	17.9096
EVM0009787	1	putative cyclin-D6-1	10.1907	1.73935	3.68944	2.67492	0.759004	0.638137	0.367468	1.15133	0.159782	1.97523	4.22504
EVM0002695	1	PREDICTED: ABC transporter G family member 14	19.7097	0.405064	0.814252	3.55502	1.37393	1.26077	0.963978	0.582233	0.494712	5.63004	7.06675
EVM0016715	1	PREDICTED: uncharacterized protein LOC18612724 [Theobroma cacao]	12.5791	0.725568	0.609615	3.6725	0.17762	0.0609303	0.38166	0.621735	0.227106	1.77519	4.28729
EVM0013262	1	vinorine synthase-like	43.5895	7.7847	5.45789	17.897	1.49737	0.245473	0.119554	0.317834	0.021334	8.97616	4.14473
EVM0001284	1	hypothetical protein VITISV_015543	23.9719	0.969582	5.9347	4.88639	1.29683	0.675172	0.615749	0.889114	0.084285	3.96683	4.30406
EVM0014220	1	hypothetical protein VITISV_042886	61.1751	6.17545	9.0727	3.86368	0.194259	0.160269	0.0268597	0.447763	0.21662	0.683816	0.00822033
Liquidambar_formosana_newGene_11814	1	PREDICTED: putative laccase-9	16.5987	2.77892	0.933822	5.73104	0.885391	0.161243	0.110653	0.147369	0	2.22198	0.050122
EVM0007399	1	putative disease resistance protein RGA3 [Herrania umbratica]	1.91308	0.0453403	0.213893	0.0612443	0.247725	0.0952243	0.094398	0.340678	0.132885	0.629439	0.725756
EVM0006044	1	feruloyl CoA ortho-hydroxylase 1-like	44.6362	7.97792	6.20502	7.08095	3.79542	5.15951	2.40685	1.75861	1.76873	14.422	1.32429
EVM0020481	1	PREDICTED: protein BIG GRAIN 1-like E	9.56407	0.0580577	0	0	0.150844	0.276864	0.626972	1.27397	0.184617	0.436315	3.69622
EVM0028161	1	hypothetical protein POPTR_008G071200v3	16.1719	0.243463	0.136441	0.464655	0.599316	0.916086	1.29417	3.27696	0	0.203251	0.58136
EVM0026474	1	PREDICTED: uncharacterized protein LOC100852504	4.69624	0.487321	0.597951	0	0.927057	1.17242	0.950361	1.46733	0	0.120159	0.513187
EVM0027264	1	hypothetical protein VITISV_015121	2.92537	0.497706	1.17537	1.83925	0.707536	0.502058	0.172006	0.03547	0	0.656076	0
Liquidambar_formosana_newGene_11066	1	Function unknown	22.5325	3.80441	10.3761	0.822695	0.141186	0.0359097	0	0.0596263	0	0	0.0138157
Liquidambar_formosana_newGene_11067	1	Function unknown	11.7572	3.461	1.83464	0.541271	0.01375	0.0187587	0.0648467	0.0149867	0.715294	0.414947	0.014823
EVM0023734	1	PREDICTED: brassinosteroid-related acyltransferase 1	68.2927	0.033676	0.457995	0.083975	0	0	0	0	0	3.8956	3.9645
EVM0001815	1	PREDICTED: calcium-transporting ATPase 4, plasma membrane-type	33.1435	16.0897	13.3356	22.6674	12.1721	13.3388	12.6343	13.3995	23.0483	14.2353	18.7779
EVM0020409	1	FAD/NAD(P)-binding domain containing protein [Trema orientalis]	92.2411	3.82266	13.4598	1.68454	0.56079	0.987494	0.70087	0.330406	0	0.375594	0
EVM0022066	1	PREDICTED: auxin-induced protein AUX22 [Ricinus communis]	86.4687	8.49411	8.85328	0.565785	7.16845	6.94924	5.48771	11.6261	0.931103	3.06829	7.64638
EVM0017115	1	Cu-oxidase domain-containing protein/Cu-oxidase_2 domain-containing protein/Cu-oxidase_3 domain-containing protein	219.04	42.7227	49.8999	51.9866	10.8841	3.47649	11.5959	12.8738	1.36048	57.5514	98.2348
EVM0004219	1	glycerophosphodiester phosphodiesterase GDPD6 [Durio zibethinus]	17.6779	8.16823	10.9409	7.61243	7.71203	7.31734	4.57372	7.32649	4.62279	9.2611	5.14866
EVM0004984	1	PREDICTED: subtilisin-like protease SBT5.4	2.72129	1.61518	0.820576	1.14087	0.106243	0.346938	0.292132	0.416563	1.39235	0.682026	0.990563
EVM0021654	1	uncharacterized protein LOC111311357 [Durio zibethinus]	26.0994	6.27802	3.12593	4.1906	2.62005	3.52141	4.14286	4.57702	0.490143	4.47382	3.5619
EVM0003288	1	lysM domain-containing GPI-anchored protein 1-like	41.1597	18.6118	14.7585	17.3451	12.6785	12.881	9.62553	9.18638	1.79837	11.8479	27.3472
EVM0012023	1	hypothetical protein AQUCO_03400152v1 [Aquilegia coerulea]	97.2484	27.9575	27.5883	15.7113	8.34099	7.69189	5.84316	4.77988	0.326373	4.50301	4.29493
EVM0028978	1	Nucleoporin autopeptidase, putative [Theobroma cacao]	10.3201	2.93374	4.4126	2.92794	5.35917	5.00799	4.1847	3.48381	2.05523	2.59727	6.07845
EVM0018653	1	thaumatin-like protein 1b [Herrania umbratica]	110.623	12.6852	4.67896	11.3133	4.06564	4.09569	1.77628	3.42496	0.083698	5.84061	39.0051
EVM0024260	1	beta-1,3-glucanase [Vitis riparia]	5.02569	1.64257	2.42924	0.672114	1.26265	2.36204	0.516	0.967793	0.669014	0.280497	2.14677
Liquidambar_formosana_newGene_5684	1	PREDICTED: F-box protein At5g07610-like	24.0801	1.6399	1.70143	1.29102	11.5189	1.61185	1.16966	1.09324	0	0.00860833	0
EVM0024388	1	PREDICTED: thaumatin-like protein 1b	25.5472	7.07751	3.14582	7.47578	6.9934	9.59826	6.92513	7.24692	3.73918	3.0334	10.3135
EVM0001071	1	conserved hypothetical protein [Ricinus communis]	6.92531	2.79971	1.77716	1.49046	0.61258	0.714712	1.74084	1.59535	0.916425	1.26812	2.84147
Liquidambar_formosana_newGene_3399	1	hypothetical protein CDL12_10144 [Handroanthus impetiginosus]	5.62898	0	0	0	0	0.560835	0.184165	0.640787	0	0.625676	2.77418
EVM0009679	1	PREDICTED: MDIS1-interacting receptor like kinase 2	0.61257	0.10174	0.501102	0.110507	0.147739	0.293911	0.216482	0.398931	0.198637	0.258746	0.285221
EVM0020872	1	PREDICTED: alcohol dehydrogenase	10.0545	0.577863	0.493888	0.120429	0.684631	0.192966	0.800284	1.37368	0.537189	0.311569	2.95342
EVM0009300	1	Proton-dependent oligopeptide transporter family [Corchorus capsularis]	318.483	174.778	83.7732	135.673	64.0704	49.9578	73.5314	73.1365	30.3719	63.9262	149.977
EVM0028351	1	acid phosphatase 1-like	223.146	68.3976	22.8326	27.2815	0.843183	0.55466	0.808885	2.43424	0.285945	9.35784	26.8691
EVM0012534	1	PREDICTED: monocopper oxidase-like protein SKU5	57.4982	15.3299	16.3866	15.849	10.2836	14.6018	7.90202	10.5048	2.22667	20.0605	32.2953
EVM0001450	1	PREDICTED: cytochrome P450 71D10 [Theobroma cacao]	12.7383	0.14349	0.503292	0.362938	0.709968	2.51727	1.95825	3.04784	1.34856	0.515634	2.9942
EVM0023774	1	PREDICTED: uncharacterized protein LOC100855167 isoform X2	6.50081	1.11534	2.75098	1.1303	0.564581	1.20523	0.406964	0.469047	0.0598817	0.487522	0.705225
EVM0012563	1	PREDICTED: RING-H2 finger protein ATL63	49.3584	12.9286	6.13688	7.40246	2.91269	2.10878	1.62812	0.348554	0.022206	0.282114	0.17024
EVM0023847	1	glutathione S-transferase F13-like	15.125	3.93229	5.8309	6.61325	0.293682	0.324224	0.58829	0.0475093	0	2.62913	0
EVM0004346	1	PREDICTED: cysteine-rich receptor-like protein kinase 2	1.44431	0.179992	0.487796	0.113704	0.055218	0.0345677	0	0.0392747	0.0242217	0.0210517	0.0448857
EVM0009167	1	Protein kinase domain [Macleaya cordata]	3.50739	0.783567	3.22302	0.806863	2.04554	2.27405	1.42816	1.03258	2.23174	2.10221	2.18475
EVM0022454	1	PREDICTED: uncharacterized protein LOC104598732	13.8755	4.05919	2.84389	2.52018	4.84622	4.51762	4.8692	5.2884	0.322892	4.90351	5.54478
EVM0012851	1	PREDICTED: uncharacterized membrane protein At1g06890-like	27.0363	15.8625	14.1833	9.98189	9.15322	10.2756	8.8463	8.94744	7.44841	12.8273	18.8892
EVM0006644	1	cell wall / vacuolar inhibitor of fructosidase 2	7.51999	0.0248563	0.196207	0.859378	1.36681	2.07084	0.849342	1.54791	0.129449	0.245676	2.52964
EVM0012125	1	bZIP transcription factor family protein	2.60411	0.0525287	1.09817	0.0615187	0.926382	0.739927	1.1481	0.310599	0.055639	0.261728	0.44915
EVM0028468	1	PREDICTED: protein SHI RELATED SEQUENCE 5	12.8427	3.48262	2.24523	3.85258	2.08744	1.37479	2.06276	2.54146	0.171138	2.70898	6.35414
EVM0010483	1	PREDICTED: uncharacterized protein LOC100251511	12.3862	6.38683	1.4334	3.44667	2.1627	0.929385	0.993798	2.26087	0.11492	1.82291	6.20251
EVM0023879	1	Function unknown	469.602	33.0183	16.8769	40.0273	26.5978	9.02642	28.6086	92.5667	13.4446	50.399	176.544
EVM0008693	1	PREDICTED: protein MIZU-KUSSEI 1	44.5101	0.27044	0.66795	3.02544	1.66271	5.81011	5.23309	6.10953	1.95832	5.09857	15.1968
EVM0010308	1	PREDICTED: pentatricopeptide repeat-containing protein At4g21065-like	1.30622	0.745813	0.902572	0.701552	0.402384	1.01773	0.435459	0.545383	0.544737	0.763868	0.782773
EVM0027913	1	hypothetical protein PHAVU_005G075600g [Phaseolus vulgaris]	4.28468	1.15853	1.69099	0.915537	1.05633	1.25552	1.04227	1.57937	0.810856	0.947666	2.08714
EVM0020500	1	PREDICTED: 28S ribosomal protein S29, mitochondrial isoform X1	33.1279	16.0952	19.2553	15.738	11.6923	15.8406	10.1552	9.76327	9.5219	10.1711	11.5352
EVM0025206	1	auxin-responsive protein IAA4-like isoform X2	40.1983	10.0213	8.94483	0.71655	6.4308	5.32336	5.87563	4.08741	0	0.101458	0.450069
EVM0009829	1	PREDICTED: pentatricopeptide repeat-containing protein At2g29760, chloroplastic	1.40132	0.887897	0.838437	0.806143	0.914005	0.988139	0.540286	0.426993	0.775764	0.762107	0.623976
EVM0002498	1	hypothetical protein POPTR_0005s24080g	10.9588	4.71228	6.14725	4.70704	3.57055	3.76703	3.77903	3.29087	1.44802	3.61436	4.10393
EVM0003066	1	PREDICTED: GPI mannosyltransferase 1 isoform X1	3.33432	2.04026	0.853614	1.02989	0.9701	1.05832	1.07565	1.92476	1.52914	0.359299	1.9365
Liquidambar_formosana_newGene_8627	1	Function unknown	3.1742	0.880102	0.42459	1.39684	0.34637	0.802992	1.33797	1.54808	1.18413	0.72378	1.56856
EVM0002595	1	PREDICTED: probable UDP-3-O-acyl-N-acetylglucosamine deacetylase 2 isoform X1	5.95799	2.43067	1.92141	1.10922	1.68469	1.62671	1.38383	1.37244	0.434949	1.47166	3.18102
EVM0028903	1	PREDICTED: serine/threonine-protein kinase D6PKL1	27.6698	5.14103	3.10272	3.43778	4.736	6.10614	5.0256	6.46223	6.17274	5.37556	14.0862
EVM0012091	1	PREDICTED: uncharacterized protein LOC100250289	11.0051	0.7257	0.215503	1.21249	1.57383	2.55055	0.512841	1.03391	0.013615	0.690205	4.69203
EVM0014452	1	PREDICTED: ELMO domain-containing protein C isoform X2	23.7422	9.45373	7.45751	6.81849	4.64895	6.60142	6.41882	7.9719	5.66765	6.92506	13.5854
Liquidambar_formosana_newGene_9073	1	putative galactinol--sucrose galactosyltransferase 1 [Ananas comosus]	29.1976	4.01187	16.4096	5.05377	3.70603	3.26574	4.17733	3.54455	1.43832	3.1136	13.1243
EVM0012231	1	hypothetical protein VITISV_015121	50.6934	8.24331	20.8366	21.9428	9.13529	7.63845	2.98345	0.580142	0	11.6887	0.181222
EVM0013534	1	PREDICTED: peroxidase 3	169.536	48.9265	63.2487	59.045	0.304682	0.0575763	0.622023	0.244721	0	1.83569	0.0113673
EVM0013389	1	--	703.471	139.791	97.747	64.9254	75.4145	141.594	106.747	85.7113	1.29959	33.2513	29.1778
EVM0007589	1	PREDICTED: expansin-A6-like [Gossypium hirsutum]	73.644	37.8954	22.8465	10.7252	5.70356	13.7208	7.16038	7.76368	1.38728	2.12187	32.5968
EVM0019974	1	heavy metal-associated isoprenylated plant protein 35	2.35407	0.026624	0.0188677	0.0596833	0	0.023847	0	0.0341373	0.0224187	0.538395	0.94303
Liquidambar_formosana_newGene_13591	1	Function unknown	8.55948	2.76236	2.45096	3.91737	1.59725	3.06213	2.01939	2.06684	0.941392	1.59386	2.58206
EVM0020415	1	PREDICTED: thaumatin-like protein	52.7038	20.3178	21.5602	7.68482	2.94888	6.98066	1.41889	1.62012	0.905768	3.73554	1.80465
EVM0018524	1	PREDICTED: protein LIGHT-DEPENDENT SHORT HYPOCOTYLS 4	83.1161	10.7948	2.35108	8.43047	1.53184	6.55647	2.84809	2.74684	1.35983	5.5682	40.7904
EVM0020515	1	PREDICTED: uncharacterized protein LOC100256663	16.2218	8.97382	2.49977	4.63937	3.81011	1.72677	2.24607	3.366	0.375814	3.7237	9.03204
EVM0014734	1	PREDICTED: uncharacterized protein LOC102627352	10.6978	6.04156	4.77326	3.48652	3.53518	6.23394	4.64626	6.68621	4.11247	5.50094	5.19928
EVM0015193	1	tetratricopeptide repeat protein 38	55.8624	32.9273	17.7391	26.8168	17.5221	14.9504	17.5774	20.8227	10.298	23.7463	20.4868
EVM0023437	1	60S ribosomal protein L19-2 [Prunus persica]	2.59921	0.98816	0.304338	0.508515	0.843946	0.835549	0.411769	0.342476	0.406306	0.670822	0.357724
EVM0009008	1	protein SMAX1-LIKE 3-like	3.38213	0.00524567	0	0.0436763	0.350045	1.10899	1.06556	1.21357	0.0612047	0.943851	1.43734
EVM0004808	1	adenine phosphoribosyltransferase 4 [Herrania umbratica]	63.1284	24.4834	12.2618	25.759	13.8574	14.1674	11.8316	13.0651	7.18485	7.59867	38.905
EVM0025057	1	PREDICTED: peroxidase 3	401.176	142.579	78.5055	89.6348	1.90874	0.444526	2.14995	1.16874	0	3.65372	0.0817783
EVM0009088	1	Cyclin B2,1 isoform 1 [Theobroma cacao]	7.80791	4.36246	1.31961	1.68257	1.13775	0.550526	0.428195	0.632199	0	0.905974	1.10453
EVM0021846	1	PREDICTED: uncharacterized membrane protein At4g09580	93.1616	49.5814	78.262	72.0875	74.0606	54.7985	73.7029	73.1349	64.7008	63.5867	77.4611
EVM0014279	1	PREDICTED: BTB/POZ domain-containing protein NPY2	15.2057	6.33617	7.05167	5.92936	4.63202	4.8837	3.75346	3.98364	2.39135	3.35151	4.71839
EVM0015304	1	putative nuclear RNA export factor SDE5	3.55113	0.831787	1.05462	0.365366	1.54777	1.21406	0.864548	0.459091	0	0.216379	0.355818
EVM0016022	1	PREDICTED: pectinesterase 2	66.3009	4.97109	2.32615	0.887071	31.7256	10.6021	6.68504	7.22956	0	0.240789	0
EVM0017777	1	24-methylenesterol C-methyltransferase 2-like [Sesamum indicum]	17.5064	5.15323	5.67817	5.07765	4.42057	4.00709	7.37538	8.97899	0.45084	3.5207	8.30115
EVM0016618	1	melanoma-associated antigen D4	28.4984	15.5337	16.6304	16.6961	11.7113	11.6331	13.1849	13.176	7.08851	11.5248	13.1912
EVM0008962	1	alpha-amylase-like	283.356	105.659	45.505	90.6553	9.26972	9.00216	3.73094	4.7179	2.75231	2.21841	2.82589
EVM0024063	1	hypothetical protein SELMODRAFT_112690 [Selaginella moellendorffii]	8.06255	1.11322	3.74289	4.63701	1.40469	1.29972	0.747676	0.94176	0.169233	1.72509	1.11599
EVM0011949	1	hypothetical protein CUMW_132530 [Citrus unshiu]	5.55154	1.07375	2.25334	3.12301	0.836083	0.441213	0.85397	0.541791	0.395744	0.510103	0.639577
EVM0010587	1	PREDICTED: LOB domain-containing protein 16	110.731	42.2322	21.7182	54.8486	9.0495	7.72384	6.18653	2.45796	0.181578	10.6803	0.525942
EVM0000376	1	uncharacterized protein LOC110766614	24.2639	11.3326	11.5058	14.2194	9.90374	12.198	10.0625	11.8085	5.39878	6.92296	16.6359
EVM0018364	1	PREDICTED: beta-glucosidase 44-like	34.2285	7.48949	4.0631	8.48318	4.93688	19.3454	14.2967	14.9526	8.60818	4.38413	13.97
EVM0016295	1	PREDICTED: CLAVATA3/ESR (CLE)-related protein 44	161.783	50.3883	70.063	86.5687	16.5211	16.7975	21.1483	18.5493	7.63017	33.8033	24.6076
EVM0015610	1	PREDICTED: uncharacterized protein LOC100242396 isoform X2	4.04949	1.12894	1.56316	1.08478	1.11727	0.673419	0.57997	0.445436	0.039943	0.126109	0.496263
EVM0011350	1	Uridine 5&apos;- monophosphate synthase/orotate phosphoribosyltransferase [Handroanthus impetiginosus]	70.1629	53.4941	26.1219	35.3515	28.9925	36.5112	34.7325	27.8282	24.6514	39.0572	46.589
EVM0023445	1	hypothetical protein VITISV_009716	15.343	1.43362	7.56588	3.77072	4.32396	2.78571	0.94166	0.179883	0	1.0182	0
EVM0016007	1	PREDICTED: uncharacterized protein LOC104612571	39.8293	18.1032	3.12322	4.72373	2.1261	3.8542	3.35642	4.0294	1.06076	2.19139	2.53631
EVM0003584	1	berberine bridge enzyme-like 13 [Durio zibethinus]	37.3722	1.61785	0.795707	0.340696	3.28094	17.9056	4.41119	4.72296	0.841072	2.44479	17.66
EVM0007000	1	subtilisin-like protease SBT1.8	359.067	166.494	76.3062	137.748	33.932	68.2943	58.9113	56.592	13.5046	39.8744	126.28
EVM0021955	1	PREDICTED: protein SHI RELATED SEQUENCE 1 [Theobroma cacao]	44.8371	16.0959	9.46534	26.3671	8.22732	7.06833	14.4382	10.262	0.457462	11.8518	8.72563
EVM0020895	1	Calreticulin/calnexin	473.173	265.424	244.505	276.655	185.134	205	178.798	133.932	97.7101	205.861	193.14
EVM0026798	1	Function unknown	50.6612	31.2021	8.31986	15.1271	14.452	6.1896	8.25428	13.4118	0.983365	9.97205	26.2122
EVM0025322	1	uncharacterized protein LOC110633734	27.2513	15.4739	15.9372	17.4534	13.3934	15.6593	15.8117	19.4201	10.855	14.5535	16.8462
EVM0011489	1	PREDICTED: protein SOMBRERO	116.521	40.9953	34.5288	27.7467	13.6567	8.02476	11.7282	3.93983	0	2.15378	0.0485207
EVM0008260	1	PREDICTED: origin of replication complex subunit 1A-like	10.3099	4.29231	4.46403	2.54669	1.53728	1.49155	0.72659	0.632193	0.0422503	0.375214	1.06247
EVM0017422	1	PREDICTED: UPF0503 protein At3g09070, chloroplastic [Ricinus communis]	73.093	19.6557	12.859	15.9719	12.4122	19.6774	14.635	12.7854	1.52009	7.52916	13.3006
EVM0012086	1	unknown	78.9205	44.6193	44.562	39.4444	40.6069	43.1077	32.7537	29.4586	25.9987	37.6285	37.6005
EVM0016389	1	PREDICTED: tetrahydrocannabinolic acid synthase-like	22.6413	1.55679	0.881702	0.331185	4.63694	12.6085	2.75768	2.17031	0.387095	0.988751	6.38789
EVM0028780	1	hypothetical protein VITISV_015121	20.3754	1.65778	10.7606	3.74141	5.94609	3.74586	1.16011	0.167314	0	1.33533	0.0363757
EVM0016308	1	APC membrane recruitment protein 1-like	36.4394	18.0193	3.75224	8.62115	5.70545	2.7408	1.77672	2.5169	0.0302667	2.76182	4.8093
EVM0001029	1	Function unknown	758.577	340.461	366.963	219.083	266.788	237.354	167.592	201.293	150.961	143.563	124.683
EVM0017365	1	PREDICTED: LOW QUALITY PROTEIN: uncharacterized protein LOC104590182	2.59566	0.768024	0.58886	0.091723	0.66985	0.271521	0.126423	0.0596397	0.00819833	0.045566	0.003765
EVM0021056	1	PREDICTED: WD repeat-containing protein 44	8.79232	0.0945887	0.277676	0.055486	0.582976	0.621874	0.645186	0.880477	2.49871	0.814285	4.29097
EVM0009744	1	PREDICTED: protein LATERAL ROOT PRIMORDIUM 1	81.4825	35.6489	17.9478	36.1946	10.37	14.8017	13.1319	14.5674	2.69026	7.50843	24.691
EVM0029197	1	uncharacterized protein LOC112011319	272.48	49.0736	77.1274	15.8159	65.4357	65.863	30.2136	15.5045	2.69371	8.31876	0.943354
EVM0025466	1	PREDICTED: uncharacterized protein LOC108216693 [Daucus carota subsp. sativus]	65.6859	56.4087	31.0126	46.3995	44.0616	37.986	46.9984	43.8898	44.8522	46.9873	52.0222
EVM0000334	1	hypothetical protein CUMW_169040 [Citrus unshiu]	7.30463	3.11911	2.25918	1.10526	2.57909	1.93097	2.15798	1.49249	1.13956	1.27597	1.78618
EVM0018712	1	PREDICTED: bifunctional protein FolD 2	65.6786	41.7816	38.6473	40.2157	35.7375	35.4321	31.2975	27.4739	31.9951	33.169	24.6304
EVM0027228	1	PREDICTED: uncharacterized protein LOC100249520 isoform X1	80.7123	34.0538	41.9659	23.4361	27.2543	32.0112	26.7527	29.9482	18.8354	21.8624	18.4538
EVM0025179	1	PREDICTED: phosphoenolpyruvate carboxykinase [ATP]-like	1007.63	291.039	437.688	388.597	300.096	161.703	205.027	184.575	48.4734	43.494	49.3535
EVM0007706	1	PREDICTED: probable serine/threonine-protein kinase drkD	36.7937	11.9407	8.39974	11.1886	8.20077	8.94623	10.0205	12.1926	0.894213	5.28962	9.51193
EVM0000783	1	hypothetical protein AQUCO_00200406v1 [Aquilegia coerulea]	1.55177	0.51407	0.992242	0.507798	0.393609	0.448935	0.487635	0.526683	0.129296	0.439907	0.617466
EVM0012570	1	kinesin-like protein NACK1 [Prunus persica]	9.90699	4.65149	1.62832	2.6088	1.99182	1.11131	0.940665	1.36652	0.149166	1.11319	2.07579
EVM0027151	1	protein NUCLEAR FUSION DEFECTIVE 6, chloroplastic/mitochondrial isoform X4	32.3127	22.3821	18.4352	14.2554	15.4558	17.1978	14.8148	13.5788	10.0462	20.3541	15.6453
EVM0017970	1	expansin-A4 [Jatropha curcas]	42.2138	1.27999	4.42128	0.015507	3.07013	21.221	15.6574	7.17316	1.28856	2.82208	20.0722
EVM0001494	1	PREDICTED: uncharacterized protein LOC100259457 isoform X2	12.8609	0.217322	0.205847	0.0340377	1.43219	1.20878	1.06401	1.16655	0.0241327	1.83437	6.03876
EVM0027246	1	PREDICTED: mitotic spindle checkpoint protein MAD2 [Gossypium hirsutum]	16.9498	8.52268	1.86723	3.46731	3.84099	1.99559	1.40395	2.25081	0.0114407	1.3532	4.04619
EVM0001654	1	PREDICTED: protein NLP9-like [Prunus mume]	29.3811	10.601	13.7813	17.2911	8.91633	10.8234	14.2329	16.0152	4.31231	10.9428	10.0899
EVM0028914	1	PREDICTED: uncharacterized protein LOC103946619 [Pyrus x bretschneideri]	29.1682	11.6375	9.53648	7.3317	4.59013	5.31236	5.91159	5.45252	1.718	2.69058	4.34277
EVM0020858	1	hypothetical protein MANES_10G115800 [Manihot esculenta]	280.721	115.714	111.557	97.275	126.838	113.02	151.472	151.774	75.8891	104.739	104.241
EVM0009865	1	PREDICTED: uncharacterized protein LOC100260976	39.6668	29.6177	16.7837	25.0842	18.0123	21.9466	24.9112	23.5138	19.9386	23.614	23.0191
EVM0011999	1	PREDICTED: cycloartenol-C-24-methyltransferase isoform X3	217.88	90.6454	104.023	62.5087	99.9188	98.1185	116.532	114.806	56.7517	65.0256	109.634
EVM0009779	1	Band 7 protein [Corchorus capsularis]	3.26563	0.0499773	0.331209	0.128864	1.65293	0.409	0.691898	1.42216	0	0.280663	0
EVM0003720	1	PREDICTED: pentatricopeptide repeat-containing protein At4g35850, mitochondrial	27.7438	19.9109	12.488	13.4697	13.0004	15.9331	17.5877	17.8836	15.8544	16.0004	14.5001
EVM0005181	1	PREDICTED: histone acetyltransferase type B catalytic subunit isoform X2	57.6224	39.1969	27.1585	29.4742	25.7742	26.0889	23.7737	24.805	19.3267	23.1285	29.2868
EVM0011745	1	PREDICTED: GATA transcription factor 18	6.44014	2.55512	0.500912	1.78469	1.12904	1.97891	1.14063	0.530566	0	0.223403	0.779097
Liquidambar_formosana_newGene_14658	1	Function unknown	12.8185	1.7697	1.11342	1.41142	1.94907	3.57791	3.14024	3.36247	0.0335937	0.806954	0.996758
EVM0000188	1	pentatricopeptide repeat-containing protein At3g04130, mitochondrial	12.5831	7.78677	6.99247	9.0944	6.20822	6.9399	6.13894	7.11832	5.3963	5.47766	5.5983
EVM0018750	1	PREDICTED: cytochrome P450 CYP82D47-like	120.808	37.9359	54.7085	47.3705	17.8153	15.5853	13.3248	11.4351	0.705989	7.94336	11.7507
EVM0023164	1	PREDICTED: uncharacterized protein LOC108992746	83.2025	36.5741	45.5583	47.2961	37.1109	36.9438	37.2121	43.6551	16.0819	42.5274	28.2677
EVM0005675	1	PREDICTED: succinate dehydrogenase subunit 5, mitochondrial-like	65.2545	46.5499	24.3387	31.7851	25.1476	37.7809	29.1655	28.7574	22.153	40.6276	35.8494
Liquidambar_formosana_newGene_11305	1	Function unknown	3.18101	0.418755	0.569258	0.96865	1.08673	1.02422	0.400389	1.50097	0.372149	0.66888	1.78728
Liquidambar_formosana_newGene_1751	1	Basic-leucine zipper transcription factor [Trema orientalis]	31.6004	13.9903	14.7481	12.4382	16.9039	11.402	11.3554	11.9693	8.38907	7.55344	9.35068
EVM0022952	1	hypothetical protein POPTR_004G074900v3	540.234	362.267	196.344	253.928	223.695	251.407	179.276	159.142	170.181	275.194	193.635
EVM0014845	1	PREDICTED: uncharacterized protein LOC108997931 isoform X2	223.078	62.4997	104.432	77.2502	9.40534	9.69133	10.6845	14.1798	30.2627	12.6312	5.17146
EVM0022663	1	Function unknown	14.5236	12.4905	8.29115	9.12992	8.6446	8.65381	9.12436	11.6108	8.67684	10.065	9.80653
EVM0004374	1	PREDICTED: inositol oxygenase 1-like	31.6404	1.1049	16.9268	5.94267	0.645749	0.192964	0.119838	0.031936	0	0.0715083	0.0161763
EVM0004524	1	hypothetical protein VITISV_002335	53.2176	34.4802	18.1486	37.8604	23.8436	32.9483	26.4669	23.9069	24.0445	29.2695	25.6647
EVM0025287	1	PREDICTED: pentatricopeptide repeat-containing protein At3g13160, mitochondrial-like	43.156	27.6325	15.5139	18.9544	13.7253	21.1022	15.0023	12.7543	9.79921	16.1957	17.9909
EVM0017244	1	PREDICTED: ethylene-responsive transcription factor ERF113-like	187.938	39.852	28.9687	28.062	36.5633	52.7603	66.1787	64.1894	8.08972	53.9179	7.48598
EVM0006925	1	PREDICTED: uncharacterized protein LOC100259535	9.28476	1.0107	2.54886	0.254001	2.79838	3.30331	1.53189	1.06913	0.480234	0.107668	0.357183
Liquidambar_formosana_newGene_7772	1	Function unknown	2.93142	0.208163	0.196352	0.063336	0.41989	0.572356	0.697142	1.14823	0	0.14419	0.851593
EVM0021543	1	salicylate carboxymethyltransferase-like	21.7601	11.3077	5.03799	4.48857	2.42118	3.68062	4.10104	2.36822	0	1.90654	2.12238
EVM0002516	1	uncharacterized protein LOC110409369 [Herrania umbratica]	115.877	59.5466	24.2991	18.864	31.0421	24.3341	19.8811	11.6287	3.54341	13.1941	19.8546
EVM0000513	1	Ribosomal protein S7e family protein isoform 2, partial [Theobroma cacao]	611.926	388.066	292.434	204.617	321.187	385.04	306.32	298.889	266.39	319.507	318.884
EVM0010043	1	PREDICTED: uncharacterized protein LOC108982979 isoform X2	72.508	38.3925	38.5137	32.6386	44.9584	31.1077	32.5843	33.155	28.7079	21.3423	24.1362
EVM0013579	1	hypothetical protein CDL15_Pgr025197 [Punica granatum]	11.2262	6.14624	6.37873	7.17063	7.64833	8.40835	5.70714	5.6839	5.37439	4.45872	7.78701
EVM0003297	1	transcription factor CPC-like isoform X2	207.352	98.9367	36.3881	69.1292	61.8169	34.4425	38.616	34.4917	20.8332	24.3491	10.1126
EVM0018388	1	putative SNAP25 homologous protein SNAP30	23.2323	10.1655	10.1225	5.00575	6.70759	6.23115	4.94662	2.89355	0.281811	1.92675	3.942
EVM0021625	1	PREDICTED: serine/threonine-protein kinase HT1	31.3688	18.3714	13.7413	13.4435	15.1542	16.3552	14.8914	15.9383	12.3355	12.0589	12.4775
EVM0006966	1	PREDICTED: WD repeat-containing protein YMR102C	36.5967	20.0489	12.9594	24.453	14.9025	18.1379	17.3055	20.2197	25.0876	13.0372	13.2619
EVM0000458	1	selenium-binding protein 1-like	25.7236	15.9128	9.07334	4.18437	10.8973	9.29012	12.4495	17.127	13.6033	14.5113	11.8081
EVM0005344	1	hypothetical protein GOBAR_AA23984 [Gossypium barbadense]	143.354	86.5303	57.4828	62.2115	50.8332	54.6109	61.6242	59.9534	35.6273	51.1771	38.1746
EVM0020811	1	glucan endo-1,3-beta-glucosidase-like	173.897	79.1893	47.2981	27.839	48.3417	51.9815	21.4987	16.0102	0.573156	54.2574	0.405432
EVM0004654	1	PREDICTED: serine/threonine-protein phosphatase PP1 isozyme 4	67.9981	45.4991	42.0894	46.8797	36.186	46.1672	40.5888	39.828	26.5939	41.3641	41.6903
EVM0024129	1	PREDICTED: putative pentatricopeptide repeat-containing protein At5g37570	1.54842	0.920625	0.795813	0.942123	0.615791	0.975069	0.643684	0.531929	0.362558	0.797138	0.705234
Liquidambar_formosana_newGene_7219	1	hypothetical protein Ccrd_002871 [Cynara cardunculus var. scolymus]	2.16704	0.976564	0.316311	0.219654	0.56714	0.804479	0.554762	1.29762	0.484897	0.484184	0.35388
EVM0003171	1	homeobox-leucine zipper protein HAT4 [Jatropha curcas]	104.33	43.6365	43.0157	45.1759	25.3662	37.4685	53.7178	57.9006	23.0007	16.6104	28.4309
EVM0009971	1	uncharacterized protein LOC112027509 isoform X2	18.2197	11.2515	8.26433	9.19523	9.29813	8.66343	9.85486	8.952	6.38461	6.55859	8.17551
EVM0013638	1	transcription factor ABORTED MICROSPORES	0	0.0159347	0.009405	0.00984367	0.030068	0.0149543	0.273522	0.530526	0.287235	0.370469	0.162977
EVM0012272	1	PREDICTED: mRNA-decapping enzyme-like protein isoform X1	20.5529	13.4314	10.4987	12.4124	9.86062	11.9055	10.8002	9.96931	7.41222	7.94903	10.4421
EVM0014992	1	60S ribosomal protein L19-3 [Lactuca sativa]	457.567	277.192	168.765	146.452	154.719	211.078	143.482	128.159	104.899	140.131	110.244
EVM0014239	1	PREDICTED: uncharacterized protein LOC104597057 isoform X2	18.1964	11.2325	3.5226	5.13773	2.72342	6.6958	9.75498	7.87496	4.02166	3.50642	6.00313
EVM0018275	1	PREDICTED: probable RNA helicase SDE3	20.8641	9.38775	8.40673	7.575	6.47092	9.83831	3.71173	4.36255	1.28992	4.57677	4.13358
EVM0005561	1	PREDICTED: uncharacterized protein LOC108980286	68.6004	36.2177	8.55935	14.3858	24.8406	28.4531	22.1789	21.2247	7.93853	18.1585	16.2333
EVM0008745	1	PREDICTED: uncharacterized protein LOC109007385 isoform X1	13.5719	9.28024	7.87145	4.55526	6.52591	14.0114	5.19449	3.27453	9.04028	6.63136	8.50688
EVM0005097	1	ribosomal protein S11 (chloroplast) [Liquidambar formosana]	8.88054	6.53485	3.67462	4.0792	4.26682	4.46933	5.19547	4.47299	3.81259	4.18992	2.94536
EVM0021517	1	uncharacterized protein LOC100499981	119.429	15.6332	3.85804	4.17977	19.6448	30.4367	18.9214	25.7123	3.55955	14.4411	62.252
Liquidambar_formosana_newGene_12720	1	uncharacterized protein LOC18784477 [Prunus persica]	4.98244	0.753782	0.918649	0.51777	1.75378	1.55914	1.94831	2.05121	0.158431	0.304473	1.88184
EVM0005046	1	Myb_DNA-binding domain-containing protein	15.8947	1.00155	2.02398	1.76081	2.7236	2.94666	8.18612	7.37629	8.29894	2.17465	1.63562
EVM0008680	1	PREDICTED: pectinesterase	72.9661	2.18017	1.70045	0.63103	7.32631	10.2969	15.9565	26.912	12.7125	19.7561	31.2745
EVM0022208	1	PREDICTED: uncharacterized protein LOC105765137 [Gossypium raimondii]	72.3299	59.1399	28.1891	38.1789	47.4695	44.4029	43.023	49.12	39.2269	44.6704	48.7798
EVM0024403	1	PREDICTED: elongation factor 1-beta 2	786.776	549.097	487.904	334.849	465.613	471.393	454.619	526.911	371.255	504.458	605.663
EVM0005002	1	PREDICTED: protein ABHD17B [Theobroma cacao]	14.9708	7.96579	5.44503	7.78321	5.97227	7.4997	7.81011	7.97134	5.97496	6.15939	10.7097
Liquidambar_formosana_newGene_6285	1	putative nuclease HARBI1 [Asparagus officinalis]	2.56405	0.364576	0.523378	0.896728	0.52391	0.357842	0.704613	0.703341	1.70063	0.166781	0.436772
EVM0006975	1	LOW QUALITY PROTEIN: 2-methylbutanal oxime monooxygenase-like [Herrania umbratica]	30.241	0.249994	1.66725	0.464888	1.31513	2.65276	3.0147	3.22631	15.0553	2.75909	8.49034
EVM0023228	1	PREDICTED: pentatricopeptide repeat-containing protein At5g59600-like	2.09998	0.93004	1.1542	0.920586	0.548988	0.858176	0.400423	0.588285	1.06615	1.14351	0.821188
EVM0000868	1	40S ribosomal protein S16 [Jatropha curcas]	1090.44	695.45	413.207	388.748	522.858	753.951	551.989	513.151	384.085	628.708	570.035
EVM0028175	1	gamma carbonic anhydrase-like 2, mitochondrial	96.7861	65.1595	36.6898	50.5141	41.5407	43.4527	37.3771	37.5667	40.9496	59.5489	43.6638
EVM0017150	1	hypothetical protein AQUCO_01700470v1 [Aquilegia coerulea]	519.033	360.612	195.42	172.617	251.004	317.958	323.611	283.424	215.147	261.102	292.347
EVM0010381	1	PREDICTED: uncharacterized protein LOC105123025	50.7524	12.4923	8.58556	15.7034	10.2975	7.04818	14.5338	20.1858	9.18753	23.2194	27.109
EVM0012390	1	PREDICTED: L-type lectin-domain containing receptor kinase S.4 isoform X1	5.14923	3.03465	0.714898	1.79785	1.34203	1.32929	1.64569	1.17619	0.731066	3.16045	0.271231
EVM0022692	1	fructokinase 7	10.1379	5.07864	5.87183	5.9611	5.1663	6.06972	5.2414	3.96119	4.84866	2.75957	2.97054
EVM0007578	1	PREDICTED: uncharacterized protein At5g05190-like	1.76239	0.219529	0.29072	0.244701	0.11291	0.19889	0.108115	0.519162	0.570089	0.81022	0.854128
EVM0012779	1	ChaC domain-containing protein	26.9625	16.1255	13.7512	8.38706	12.8247	11.3864	17.3948	21.6298	19.128	9.99793	7.55025
Liquidambar_formosana_newGene_7666	1	Retrotransposon gag protein [Corchorus capsularis]	9.93487	5.13371	4.63579	4.80581	4.73551	4.14941	3.15428	3.87079	1.06668	5.10085	1.8134
EVM0003271	1	Glyco_hydro_1 domain-containing protein	21.8828	5.09279	5.16556	12.3659	0.659486	0.282546	0.226153	0.149131	0.0142563	1.2298	0.226641
EVM0000380	1	PREDICTED: cytochrome P450 81E8-like [Fragaria vesca subsp. vesca]	13.1539	7.08196	7.67526	9.49844	7.89113	6.30302	5.32606	4.62084	3.79205	6.38747	5.13509
EVM0027525	1	indole-3-acetic acid-amido synthetase GH3.17-like	37.3982	12.5391	0.923445	22.1006	0.280064	0.512231	1.41991	0.75073	0.046169	0.628707	0.454144
Liquidambar_formosana_newGene_2426	2	uncharacterized protein LOC111315199 [Durio zibethinus]	0.0837673	2.1059	0.577105	1.09577	0.200395	0.172083	0.177658	0.147859	0	0	0.0230543
Liquidambar_formosana_newGene_106	2	Function unknown	0.541764	49.4274	4.50179	20.7976	0.356963	0.245985	0.069499	0.145587	0.075519	0	0.012097
EVM0016391	2	PREDICTED: UDP-glucuronate:xylan alpha-glucuronosyltransferase 1	0.480853	3.70221	0.602992	2.06165	0.218611	0.163859	0.341096	0.111951	0.0415673	0.0988453	0.00771533
EVM0013576	2	PREDICTED: protein ECERIFERUM 1	1.17433	96.2893	25.41	61.8714	7.12396	19.5579	11.6534	34.0273	0.009442	0.626783	2.9777
EVM0000206	2	putative disease resistance protein At1g50180	0.529856	1.92955	0.522897	1.2362	0.623857	0.424628	0.636569	0.595679	0.00643	0.19853	0.232077
EVM0003426	2	alpha-galactosidase 1 [Jatropha curcas]	0.492457	16.4278	2.83665	7.93977	2.21083	0.646338	1.00489	0.576073	0.215926	0.47586	0.175231
Liquidambar_formosana_newGene_4407	2	Function unknown	0.184644	6.05123	1.31452	1.53435	0.181771	0.0848737	0.554368	0.235896	0.842853	0.162934	0.067419
Liquidambar_formosana_newGene_4406	2	Function unknown	1.5469	14.063	3.94129	5.97215	0.740133	0.713753	2.08903	0.956478	2.49744	1.06112	0.52178
EVM0017440	2	unnamed protein product [Coffea canephora]	0.37692	34.9816	4.52379	18.5579	6.43471	6.46559	3.1103	2.22588	0.277831	0.038794	0.382299
EVM0019310	2	PREDICTED: uncharacterized protein LOC109009601	19.5491	222.897	37.4774	113.862	13.9979	10.4137	24.3689	77.6845	6.23673	7.94685	2.70139
EVM0020185	2	TPS04 [Liquidambar formosana]	1.92658	38.9141	10.7519	13.927	4.36219	4.652	1.43602	1.79382	0	5.07789	4.40677
EVM0004198	2	unnamed protein product, partial	3.49282	15.6322	1.97226	5.7486	1.48004	1.43771	0.609915	0.205214	1.20545	0.536488	6.76575
EVM0011882	2	PREDICTED: fatty-acid-binding protein 1	0.146622	8.4697	2.05542	4.90686	0.506875	0.578946	0.22626	0.625639	0.162948	0.631176	0.44552
EVM0021566	2	protein LYK5-like [Herrania umbratica]	0.205318	3.84531	0.964598	1.32479	0.310539	0.296004	0.010501	0.03653	0	0.0679413	0
EVM0006447	2	PREDICTED: disease resistance protein RPM1-like	2.91041	7.1844	3.45345	3.21965	0.354175	0.254064	0.511719	0.097273	0.016647	0.0228143	0.00580367
EVM0009447	2	hypothetical protein POPTR_0002s03930g	47.0114	125.902	33.7421	78.9262	28.9474	24.3121	29.6874	32.1151	6.2092	6.5025	12.6171
Liquidambar_formosana_newGene_6625	2	dolichyl-diphosphooligosaccharide--protein glycosyltransferase subunit 4a	3.17812	7.7543	4.2529	5.21558	3.96058	4.06188	3.00979	3.72144	2.01158	3.24541	3.44338
EVM0024930	2	LRR_1 domain-containing protein/Pkinase_Tyr domain-containing protein/Malectin domain-containing protein/LRR_4 domain-containing protein	0.860395	3.07136	1.22218	2.10833	1.57749	1.241	1.3699	1.40876	0.260804	0.575259	0.542735
EVM0016469	2	hypothetical protein POPTR_0018s05470g	17.1752	26.9086	17.8339	21.6369	16.0013	15.2774	23.1829	15.7461	16.6921	18.9655	17.8826
EVM0014823	2	PREDICTED: uncharacterized protein LOC109122224	0.405888	3.83371	0.162226	1.48896	1.27557	0.367217	1.7041	1.29258	0	0.140947	0
EVM0015222	2	putative disease resistance protein RGA1	4.35725	47.394	16.6971	27.9742	8.91594	7.22423	6.22934	3.67872	2.50575	0.962065	3.78955
EVM0007945	2	hypothetical protein CFP56_18463	0.137882	2.15152	0.647499	1.35043	0.0856943	0.023272	0.00787567	0	0	0.0125983	0
EVM0020045	2	RPM1-interacting protein 4-like	1.39301	5.15088	0.981919	2.80296	1.04705	0.668598	2.06557	1.45033	0.086887	0.309046	0.115224
EVM0018866	2	protein GRIM REAPER	0.80839	10.6761	1.19791	4.0991	0.015107	0.0216313	0	0.0319507	0	0.454179	0
EVM0014501	2	PREDICTED: protein gamma response 1	1.71307	3.34296	1.43449	2.01222	0.871506	0.797445	0.541646	0.31204	0.0446873	0.245064	0.555659
EVM0009368	2	probable disease resistance protein At4g27220	0.537661	4.43846	1.28491	1.62326	0.295456	0.261363	0.347468	0.166683	0	0.0695427	0.084462
EVM0009614	2	PREDICTED: non-specific lipid-transfer protein A-like [Nicotiana tabacum]	3.12165	8.03824	3.25455	5.39979	2.37512	2.83833	2.517	3.23337	1.05127	2.90391	3.31725
EVM0004414	2	probable pectinesterase/pectinesterase inhibitor 7	0.239434	10.8759	0.391149	4.26113	0.873938	0.406322	0.620965	0.374952	0.0269517	0.510041	0
EVM0010472	2	Function unknown	1.14693	13.6858	3.57915	4.37619	0.936772	2.05275	0.892732	0.719079	0.0797507	0.261198	0.13084
EVM0013871	2	Thiolase [Corchorus capsularis]	65.1922	117.58	66.7505	100.794	73.9874	87.2194	70.7035	73.6683	57.6733	67.6679	37.9223
EVM0001124	2	hypothetical protein PanWU01x14_087570 [Parasponia andersonii]	4.36982	932.347	129.208	498.21	119.526	163.905	118.741	127.849	10.6571	12.4811	22.1842
EVM0020531	2	PREDICTED: 11-beta-hydroxysteroid dehydrogenase 1B-like	1.66775	31.7799	8.00281	19.1732	3.87264	2.69366	4.51639	4.38118	0.031177	0.650201	1.52206
Liquidambar_formosana_newGene_12960	2	Function unknown	0.277301	3.64018	1.3453	0.82939	0.312478	0.329236	0.119752	0.139297	0	0.0362827	0.0278557
EVM0029276	2	protein NRT1/ PTR FAMILY 5.1	0.254938	7.75506	2.66183	2.77712	0.009294	0	0.077006	0.319644	2.92628	0.827705	3.58143
Liquidambar_formosana_newGene_9301	2	Function unknown	1.728	23.7424	1.15215	7.97265	0.184935	0.339268	0.692378	0.206321	0	0.127786	0.050408
Liquidambar_formosana_newGene_7457	2	serine carboxypeptidase-like 45 isoform X1 [Herrania umbratica]	0.00625767	2.24218	0.532778	1.35283	0.569199	0.436955	0.324264	0.316212	0.016967	0	0.0159023
Liquidambar_formosana_newGene_14717	2	hypothetical protein BVC80_8767g24 [Macleaya cordata]	0.832509	1.6654	0.712677	1.40444	0.852752	0.947013	0.901627	1.15929	0	0.240615	0.895941
Liquidambar_formosana_newGene_13075	2	Function unknown	0	3.75867	0.713168	1.70557	0.331939	0.683691	0.804418	0.179135	0	0	0.488035
EVM0020192	2	PREDICTED: GDT1-like protein 4 [Capsicum annuum]	1.16784	13.8057	4.41232	7.17027	1.97317	1.91828	1.36092	0.456614	0.0452337	2.08089	0.005876
EVM0006124	2	PREDICTED: alpha-mannosidase	0.186845	4.93911	1.23989	2.80986	1.59892	0.526003	0.675036	0.75119	0.012246	0.256092	0.087825
Liquidambar_formosana_newGene_2694	2	hypothetical protein Csa_3G176850 [Cucumis sativus]	0.0482537	5.54355	1.19243	3.27343	0.658318	0.27894	0.343678	0.149835	0.0226553	0.0148817	0.008331
EVM0011935	2	PREDICTED: acetyl-CoA-benzylalcohol acetyltransferase-like	0.169266	4.93746	0.906601	2.74981	0.355176	0.144601	0.727227	0.143969	0	0.088534	0.124237
Liquidambar_formosana_newGene_14450	2	laccase-15 [Prunus persica]	6.94219	25.6387	1.59651	12.4962	0.81508	1.20848	3.92397	7.30262	1.23974	0.442788	0.410476
Liquidambar_formosana_newGene_3216	2	Function unknown	0.688208	26.9993	1.53901	14.6986	0.922109	0.707197	0.614094	0.922579	0	0.556539	0.638017
EVM0021411	2	hypothetical protein CDL15_Pgr017052 [Punica granatum]	1.5347	49.5914	4.96943	15.8876	0.745041	0.572626	0.622533	0.323836	0	0.252551	0.59332
EVM0015366	2	unnamed protein product, partial	0.383259	3.10061	1.1024	0.816042	0.463582	0.1896	0.506209	0.0881763	0.0131863	0.177011	0.211549
EVM0001416	2	unnamed protein product, partial	0.0295827	4.95233	0.207345	3.20017	0	0	0	0	0	0	0.293793
Liquidambar_formosana_newGene_4841	2	PREDICTED: protein INVOLVED IN DE NOVO 2 isoform X1	3.06077	39.963	16.3105	13.8074	1.30488	0.452393	1.11475	5.18124	0	0.004739	0
EVM0023869	2	PREDICTED: type IV inositol polyphosphate 5-phosphatase 7 isoform X2	1.13926	7.10071	2.61583	3.72411	0.960246	2.4574	1.27232	0.796827	0.0710607	0.28007	1.62628
EVM0009485	2	PREDICTED: uncharacterized protein LOC100243848 isoform X1	7.76849	41.8295	8.06043	25.0297	10.9245	6.42019	9.02265	8.77626	14.7752	11.8305	23.3261
EVM0012195	2	PREDICTED: protein IQ-DOMAIN 14	3.11521	28.7271	7.27332	18.1839	2.38335	4.583	4.22739	3.80293	0.416719	0.493917	2.16247
EVM0026221	2	hypothetical protein CISIN_1g046892mg	0.00968933	1.86593	0.782254	1.22348	0.1853	0.0298193	0	0	0.00959667	0	0.00795567
EVM0015665	2	hypothetical protein PRUPE_6G141200 [Prunus persica]	4.10608	10.1236	3.23867	6.27868	2.73021	1.81745	2.32174	3.26599	0.750021	2.70094	5.6768
EVM0000212	2	hypothetical protein CDL15_Pgr016704 [Punica granatum]	2.14802	79.0165	33.9108	42.7112	35.7459	32.1073	40.9322	43.2585	35.8841	18.7062	38.9512
EVM0001970	2	hypothetical protein CFOL_v3_34432	0.264776	14.4155	2.55892	3.59892	0.186548	0.057533	0	0.0199957	0	0.00625267	0.0160413
EVM0025878	2	hypothetical protein CDL15_Pgr025353 [Punica granatum]	0.553968	62.6697	9.72784	35.8402	10.6748	9.99338	8.74625	6.46964	7.34377	1.22243	3.68685
Liquidambar_formosana_newGene_4287	2	Function unknown	2.39003	48.2414	10.7958	17.3771	7.73295	8.4245	9.92477	12.5216	2.45171	4.22956	4.962
EVM0028910	2	PREDICTED: protein POOR HOMOLOGOUS SYNAPSIS 1 isoform X1	2.10449	5.0675	1.58011	2.98194	1.54976	1.49011	0.845404	0.887004	0.0510387	0.447333	0.462113
EVM0010440	2	Oxysterol_BP domain-containing protein, partial	39.0816	182.527	45.4924	112.356	56.5734	38.2056	38.5935	40.0042	17.8716	24.4574	14.6053
EVM0001110	2	flavonoid 3&apos;,5&apos;-methyltransferase	1.84045	63.4996	7.20146	15.4706	1.98454	1.07293	0.704239	0.511866	0.0341413	2.74832	0.93163
EVM0025056	2	PREDICTED: LRR receptor-like serine/threonine-protein kinase RCH1	1.04102	4.79208	1.46074	2.98389	0.742113	0.659039	2.24893	1.09092	0	0.336575	0.02634
EVM0010971	2	PREDICTED: glycosyltransferase family protein 64 protein C5-like isoform X1	43.7625	101.91	23.5367	70.1675	37.2159	32.3899	40.7633	37.2125	5.99292	37.4765	8.7149
EVM0003599	2	unnamed protein product, partial	0.49226	9.99692	2.54893	1.99981	0.699646	0.587185	0.916352	0.380789	0.125107	0.573119	0.385345
EVM0013712	2	PREDICTED: uncharacterized protein LOC100250572	1.80714	21.0526	1.71334	18.01	10.2462	4.30679	11.4892	11.6148	4.42804	7.77285	6.33871
EVM0028040	2	PREDICTED: uncharacterized protein LOC104456442 [Eucalyptus grandis]	31.459	622.347	87.2376	258.41	24.1144	5.1364	8.7752	1.99334	0.0237353	3.47833	0.030655
EVM0013983	2	PREDICTED: cystinosin homolog isoform X1	14.9686	33.0437	21.3484	20.1678	11.6443	9.14575	5.3368	17.8296	15.065	12.3692	7.39332
EVM0003683	2	PREDICTED: uncharacterized protein LOC109005144	0.149392	2.26903	0.537253	0.906257	0.118743	0	0.207853	0	0	0.0602773	0.0909577
EVM0012415	2	PREDICTED: putative cyclin-D6-1	0.502801	4.06111	1.37887	2.14434	0.150616	0.180649	0.257271	0.308921	0	0.377905	0.991109
Liquidambar_formosana_newGene_4844	2	Function unknown	0	7.07659	3.47293	2.59182	0.26513	0.173951	0.0766117	0.362922	0	0	0
EVM0004952	2	PREDICTED: 11-beta-hydroxysteroid dehydrogenase 1B-like	0.328088	66.6841	5.53543	24.6633	3.92549	3.58117	4.31678	6.52248	0.0583213	0	2.41679
Liquidambar_formosana_newGene_5987	2	disease resistance protein At4g27190-like	2.05559	5.44989	3.11729	3.13433	1.43297	1.74435	1.8483	3.35924	1.97388	3.27111	2.54872
EVM0015881	2	abscisic acid receptor PYL9	92.6965	222.449	97.5159	112.058	37.7992	58.0943	49.0019	63.8452	61.2769	40.4802	108.679
EVM0023709	2	signal peptidase complex-like protein DTM1 isoform X1	0.162775	8.41646	2.0077	5.58209	1.80564	2.11454	2.80015	4.46212	0.9548	0	1.37583
Liquidambar_formosana_newGene_10331	2	Function unknown	34.937	100.748	6.04177	49.7035	1.42151	1.7536	9.61887	27.7016	3.13876	0.319226	0.536793
EVM0016714	2	PREDICTED: uncharacterized protein LOC108988712	0.703295	53.8538	7.15046	25.1952	2.13936	1.20302	1.18816	2.92461	1.48871	1.15073	1.84642
Liquidambar_formosana_newGene_7231	2	Function unknown	0	3.69859	1.0872	1.59239	0.392471	0.272102	0	0.0829983	0	0	0
EVM0019903	2	Protein of unknown function DUF247 [Macleaya cordata]	2.54855	6.15318	2.84409	2.13645	0.945599	0.312272	0.080556	0.124109	0	0.185403	0
EVM0007882	2	PREDICTED: receptor-like cytosolic serine/threonine-protein kinase RBK1	15.4457	44.9001	21.8997	25.1926	7.99098	12.0323	9.07679	4.854	7.00052	6.6187	2.77264
Liquidambar_formosana_newGene_1020	2	Function unknown	1.53525	11.056	1.15315	9.03885	2.73907	5.34079	4.58203	3.26343	0	0.030601	0.978171
EVM0022539	2	glutathione S-transferase F13	47.6717	216.988	58.9969	116.11	63.0481	61.0883	117.937	111.341	59.6125	74.4623	104.82
Liquidambar_formosana_newGene_8319	2	Function unknown	1.502	13.2349	4.1482	4.66534	1.31995	4.82342	1.61671	0.497504	0	1.09179	0.101409
EVM0004248	2	PREDICTED: histone H2A.1-like [Phoenix dactylifera]	23.8151	84.7921	19.2355	34.9047	16.4515	15.8161	21.0248	14.8738	0.242111	1.98779	11.7866
EVM0029198	2	PREDICTED: holotricin-3	2.05705	559.081	110.119	263.883	179.931	236.242	191.005	206.393	1.22333	1.25255	30.29
Liquidambar_formosana_newGene_2071	2	protein argonaute 4-like, partial [Cucurbita pepo subsp. pepo]	3.94057	11.9962	4.21902	2.90108	0.262641	0.28454	0.600162	1.24474	0	0.192606	0
EVM0009245	2	PREDICTED: uncharacterized protein LOC18605248 [Theobroma cacao]	16.3508	628.819	89.6725	129.594	22.4852	37.6896	19.8947	20.2799	1.38675	3.71937	0.526885
EVM0024148	2	PREDICTED: BRO1 domain-containing protein BROX homolog	11.2741	24.7142	10.5685	15.5901	6.83152	5.86064	5.71107	6.74433	0.0263383	1.19746	3.37984
Liquidambar_formosana_newGene_4058	2	Function unknown	1.23648	4.95071	2.09513	1.96462	1.01225	1.29143	1.32086	1.70514	0.628996	1.23934	0.621828
EVM0010369	2	MYB1 protein [Paeonia suffruticosa]	0.691114	112.365	48.2911	75.6675	48.2034	29.1228	28.6067	20.841	0.196937	0.0153613	1.8987
EVM0023952	2	ubiquitin fusion degradation protein 1 like	9.21382	16.6601	9.73444	10.4188	9.16804	11.2814	6.44111	5.90945	9.03463	7.9369	9.28822
EVM0019454	2	PREDICTED: heavy metal-associated isoprenylated plant protein 20 isoform X1	0.559114	11.4425	1.65376	2.06078	0.149869	0.0983273	0.174164	0.190181	0	0.657477	3.83791
EVM0012432	2	Lactoylglutathione lyase / glyoxalase I family protein [Theobroma cacao]	197.501	430.873	175.542	253.035	197.047	201.5	183.74	147.945	78.1501	70.7098	184.946
EVM0023598	2	PREDICTED: histidine-containing phosphotransfer protein 1	20.6844	60.1372	17.8393	16.2389	2.60931	2.3787	2.31279	5.09371	7.20812	6.05082	24.4115
EVM0007084	2	PREDICTED: zinc finger protein ZAT4-like	2.91051	9.21859	3.65281	5.74009	4.70212	3.56845	1.75622	1.24714	0.0978353	1.07807	0.433899
EVM0010478	2	unnamed protein product, partial	2.49691	4.50132	2.32056	2.92919	1.65132	2.26086	1.66291	1.3109	0.701074	0.627192	1.69388
EVM0001708	2	PREDICTED: GDSL esterase/lipase CPRD49	7.34406	26.9194	13.5313	13.2152	5.02392	5.00161	3.03314	3.70485	0.137412	1.96232	5.18328
EVM0019534	2	PREDICTED: uncharacterized protein LOC100262500	7.00065	25.0106	13.9781	16.9982	8.74315	7.85221	9.88213	7.09848	2.64287	6.792	1.14748
EVM0009274	2	myosin-6-like	23.8903	63.8404	22.9912	34.7406	27.1845	30.4742	17.0168	10.2386	6.12838	2.48521	2.91054
EVM0023695	2	PREDICTED: ABC transporter G family member 11 [Ricinus communis]	1.61415	216.241	105.829	167.38	104.002	78.896	82.2823	65.5352	10.2445	0.135224	6.47442
Liquidambar_formosana_newGene_5775	2	protein trichome birefringence-like 14 [Prunus persica]	1.04418	2.61418	1.53641	1.94437	0.879227	1.28906	1.14709	0.869854	0.259929	0.327043	0.606315
EVM0023583	2	Function unknown	4.83008	11.8015	5.28295	7.65792	4.89302	5.75964	4.48506	3.03588	0.830318	0.970804	1.59178
EVM0028099	2	unnamed protein product, partial	0.115897	0.604476	0.34701	0.352767	0.206359	0.237254	0.089112	0.0818157	0.035715	0.0979747	0.347446
EVM0008541	2	GDP-fucose protein O-fucosyltransferase [Macleaya cordata]	2.30612	3.74906	2.20376	2.7866	1.68732	2.35418	1.7795	1.58018	0.783851	1.31271	1.89336
EVM0015051	2	PREDICTED: scarecrow-like protein 22 [Prunus mume]	11.1022	24.3665	12.5311	18.9494	11.7568	16.4531	16.6712	16.0533	7.38917	7.24188	14.9868
EVM0017215	2	hypothetical protein CFP56_15231	7.40948	12.6163	6.74841	7.81876	4.96993	6.1051	5.24866	4.10429	1.81339	3.67832	4.35807
EVM0018597	2	PREDICTED: beta-fructofuranosidase, insoluble isoenzyme 1-like	0.0879517	5.21161	2.64909	1.73053	0.988649	0.297913	0.425208	0.0629677	0.209705	0.958196	2.07118
EVM0005569	2	PREDICTED: basic 7S globulin-like	1.68624	4.40133	2.01339	2.72948	2.14524	2.34471	2.34822	1.85472	0.131847	0.472827	2.46368
EVM0029240	2	cinnamoyl-CoA reductase family protein	19.1485	26.5116	16.5485	19.7161	12.6754	15.5084	13.0514	11.903	9.54325	7.71766	10.9369
EVM0019555	2	hypothetical protein VITISV_026720	11.7421	17.81	10.7093	11.6065	7.53229	8.89414	11.0319	15.9775	9.50555	5.89454	9.96925
EVM0005246	2	Tetratricopeptide TPR-1 [Macleaya cordata]	0.84002	2.50346	1.09507	1.40432	1.16066	1.06245	1.66725	1.01216	0.175693	0.255609	1.34051
EVM0001792	2	PREDICTED: uncharacterized protein LOC104602699	1.63041	15.2618	7.67785	8.97916	5.32096	3.89933	4.65622	1.91489	0.654337	1.61701	0.843157
EVM0009470	2	PREDICTED: protein FAR1-RELATED SEQUENCE 5-like	6.46303	9.66091	5.66837	8.33516	7.01822	8.20196	6.84666	6.05741	5.04398	5.58301	6.23801
EVM0023041	2	PREDICTED: wall-associated receptor kinase-like 10	4.93265	48.1779	1.73546	10.763	0.257285	0.0156183	0.284839	0.237842	1.02697	3.45111	4.03565
Liquidambar_formosana_newGene_12918	2	Function unknown	3.00247	5.31018	1.91057	3.81792	2.20591	2.80102	2.34286	2.3512	0.697789	0.691055	2.14905
Liquidambar_formosana_newGene_13028	2	Function unknown	4.87155	12.5169	6.19813	8.15055	4.50499	7.95577	3.89197	3.14806	0.523431	2.08514	1.22997
EVM0028916	2	probable LRR receptor-like serine/threonine-protein kinase RFK1	2.97973	40.2445	16.523	16.8834	14.1938	12.9886	7.93037	5.41568	1.33186	0.674778	6.66471
Liquidambar_formosana_newGene_12838	2	Function unknown	1.93732	5.10324	2.45148	2.52418	2.1419	1.84571	1.56115	0.830893	1.34841	0.0909333	0.131912
EVM0006421	2	lysine-specific demethylase JMJ25-like	4.58878	8.97825	2.58586	3.83014	2.54118	1.36514	1.04318	3.23482	0.77263	1.00765	2.7029
EVM0024300	2	PREDICTED: phospholipase A1-Igamma1, chloroplastic	0.63123	2.7173	1.06705	0.978137	0.493836	0.824885	0.177789	0.0786857	0.031593	0.162545	0.0138503
EVM0015155	2	PREDICTED: serine carboxypeptidase-like 45 isoform X1	8.13025	34.7098	9.87189	16.1607	6.08616	14.4093	10.2412	4.04022	0.862165	6.38384	17.6941
EVM0017541	2	PREDICTED: LOW QUALITY PROTEIN: protein NRT1/ PTR FAMILY 8.1 [Theobroma cacao]	32.6919	217.567	27.635	69.0005	39.4378	25.8058	83.6607	96.5136	28.141	8.33716	28.2099
EVM0005852	2	hypothetical protein BVC80_7745g5 [Macleaya cordata]	3.2218	9.16727	2.50176	4.40258	2.30083	4.19626	1.74658	1.8564	0.131427	0.612234	0.863804
EVM0013197	2	PREDICTED: zinc finger CCCH domain-containing protein 13 isoform X1	26.6612	38.3594	22.752	28.7767	22.3176	25.422	19.6188	22.3432	11.9744	12.603	20.7942
Liquidambar_formosana_newGene_6570	2	Function unknown	5.4844	17.3951	8.2428	12.9783	6.48164	10.0471	8.97034	7.5586	1.13641	2.30476	2.05086
Liquidambar_formosana_newGene_2390	2	Function unknown	2.42777	5.75161	2.89864	4.60923	2.54783	3.15599	3.0403	3.41321	0.97494	1.28916	1.76705
EVM0002642	2	PREDICTED: uncharacterized protein LOC100242564	0.333467	3.67691	0.882161	0.745283	1.06684	0.686819	0.643759	0.240301	0.533411	0.309857	0.738195
EVM0019437	2	protein BRI1-5 ENHANCED 1-like isoform X2	3.48311	10.9108	0.856294	3.01138	0.054647	0	0.157069	0.0138157	0	0.126218	0
EVM0010716	2	PREDICTED: calcium uniporter protein 2, mitochondrial-like	9.26661	122.726	51.9897	36.7131	44.8385	38.1084	30.8949	3.80437	3.02539	7.87897	38.679
EVM0013685	2	uncharacterized protein LOC18766368 [Prunus persica]	4.86318	9.23438	4.48547	5.96053	4.30211	6.16273	4.34058	4.23323	0.804965	1.62756	4.39811
Liquidambar_formosana_newGene_802	2	Function unknown	1.95691	6.57477	3.50242	4.62906	2.3985	2.61407	3.14239	5.09548	0	0.361992	1.46299
EVM0023766	2	hypothetical protein POPTR_0003s05960g	1.13073	2.4339	1.55311	1.79172	1.20527	1.28815	1.42097	1.02688	0.227672	0.454394	0.909784
Liquidambar_formosana_newGene_8699	2	Function unknown	2.55719	4.27884	2.13586	2.06123	2.1264	2.17858	1.47512	1.88966	1.92849	0.898475	1.56461
EVM0005014	2	Function unknown	0.327346	42.3617	4.646	8.40127	9.76155	9.90221	5.57982	2.94667	0	0	0.00551467
Liquidambar_formosana_newGene_3189	2	hypothetical protein HannXRQ_Chr14g0430441 [Helianthus annuus]	4.78273	11.5228	3.51296	7.43643	6.64791	7.22469	4.68195	4.71753	2.98423	4.51571	2.4711
EVM0002055	2	PREDICTED: protein IQ-DOMAIN 1	30.1066	75.1437	17.1975	53.4701	42.7857	28.7991	41.7665	34.2971	3.04347	5.65744	20.9032
EVM0020291	2	PREDICTED: transcription factor-like protein DPA	8.90975	21.4129	12.182	13.9989	10.5706	9.08853	7.54205	10.0172	0.878906	1.60557	2.52181
EVM0026337	2	PREDICTED: calcium uniporter protein 2, mitochondrial-like	8.38471	104.034	53.5549	53.2999	37.8942	45.3808	31.2052	8.06842	1.57149	4.84501	12.6517
EVM0020844	2	PREDICTED: protein YABBY 4	0.0871923	20.2948	7.57754	4.72506	2.3848	6.76671	5.3265	10.9758	2.58582	0	12.0008
EVM0027021	2	uncharacterized protein LOC18434349 [Amborella trichopoda]	0.0944263	4.93055	1.14139	0.742778	0.610482	0.188372	0.337057	0.0568217	0.0307907	0	0.00656667
EVM0005413	2	hypothetical protein CDL15_Pgr004425 [Punica granatum]	0.442495	30.4324	13.871	10.0265	8.70162	4.97806	3.46745	1.90231	0.397062	0.208635	0.13218
EVM0001503	2	defensin-like protein 19 [Jatropha curcas]	5.12481	35.7348	1.49958	5.8044	0.155968	0.0386473	0.279945	0.0785153	0	0.309962	0
EVM0009891	2	AP2-like ethylene-responsive transcription factor BBM1	3.77759	29.128	16.034	16.8616	13.5862	9.41739	10.2226	7.80204	0	0.360817	0
EVM0027577	2	PREDICTED: LOB domain-containing protein 6	2.3291	52.0697	27.9869	27.073	7.20332	6.33082	3.57839	2.32231	0.0951947	0.014807	0.854169
EVM0013106	2	PREDICTED: AP2-like ethylene-responsive transcription factor BBM1	32.4361	204.586	106.864	90.6374	71.4421	63.196	67.0972	38.0659	0.05051	1.83248	0.255299
EVM0013896	2	PREDICTED: protein PHLOEM PROTEIN 2-LIKE A1 isoform X2	69.0612	127.056	39.904	79.6668	47.4459	43.1705	66.6992	68.2625	6.61648	39.4651	16.6062
EVM0006567	2	PREDICTED: selenoprotein H	4.47749	9.4831	7.21306	6.7488	3.77636	6.69539	4.75834	4.07243	2.94495	1.82328	6.96953
EVM0015410	2	PREDICTED: AAA-ATPase At3g28580-like [Daucus carota subsp. sativus]	2.07905	3.94599	1.82756	1.98034	1.29632	1.86501	1.70256	1.05036	0.478674	0.777994	0.859625
EVM0004299	2	PREDICTED: dCTP pyrophosphatase 1 [Theobroma cacao]	3.69604	16.0715	7.86602	5.25329	3.89892	6.89839	3.91495	1.75018	0.036432	0.507865	0.446975
EVM0028688	2	phosphoenolpyruvate carboxylase 2 isoform X1	3.62696	47.7807	19.9041	20.3761	12.2724	12.5009	18.4615	24.2633	32.4523	9.04247	16.407
EVM0003040	2	bifunctional nitrilase/nitrile hydratase NIT4A isoform X1	24.9883	39.0644	24.1038	30.7499	23.042	25.6509	22.0252	23.9595	32.0151	26.9226	14.8444
EVM0025973	2	PREDICTED: protein PLANT CADMIUM RESISTANCE 7-like [Prunus mume]	1.21286	31.6464	2.49028	3.16832	0.0335227	0	0.0410577	0.0396623	0	0	0
EVM0014667	2	PREDICTED: uncharacterized protein C12B10.15c isoform X2	14.4744	29.8106	17.6793	13.0309	10.9553	14.1419	11.3906	7.87347	6.28861	7.97628	6.3428
EVM0017421	2	PREDICTED: putative pentatricopeptide repeat-containing protein At1g68930	0.815585	1.58075	1.11883	1.06936	0.662954	1.00413	0.78714	0.951204	0.499866	1.05109	0.598688
EVM0016192	2	PREDICTED: tubby-like protein 8	7.28961	35.3488	19.3861	18.1309	8.79625	7.86669	4.34583	3.02242	0.313679	0.952663	1.69355
EVM0023249	2	PREDICTED: peroxidase 4	2.27557	8.06611	4.16056	1.78372	1.50539	3.25303	1.10983	0.435156	1.18855	0.472617	1.58143
EVM0000079	2	PREDICTED: 26S proteasome non-ATPase regulatory subunit 2 homolog A isoform X4	0.916915	24.0548	12.1486	10.4276	9.7955	8.93341	4.97556	4.44041	0.895882	1.3423	0.728282
EVM0024768	2	PREDICTED: probable glycosyltransferase At5g03795	0.471426	5.16089	1.16443	3.71651	3.81166	1.40081	2.09915	2.24764	0.445445	0.0782207	0.176449
EVM0006320	2	MYB1 protein [Paeonia suffruticosa]	0.694063	5.3053	2.80845	4.01894	2.26214	2.86444	2.82703	2.19332	0.465238	0.717139	1.04211
EVM0011557	2	PREDICTED: non-specific lipid transfer protein GPI-anchored 1	1.68429	556.45	170.165	284.479	223.308	238.969	157.029	136.148	10.111	4.5938	15.8753
EVM0007062	2	PREDICTED: cytosolic sulfotransferase 15	0.242664	15.9587	0.111065	2.06491	0.0140457	0.0210037	0.0719343	0.0458493	0	1.76065	0.0151083
EVM0018312	2	--	0.131477	8.90022	4.04281	0.618191	0.275726	0.139481	0.023292	0.0235523	0	0.105468	0.0250153
Liquidambar_formosana_newGene_11779	2	Function unknown	1.38917	10.1664	6.02514	5.12339	0.706382	1.31566	1.1578	0.620038	0	0.0485403	0
EVM0026176	2	DNA polymerase delta subunit 4-like	59.2289	104.855	61.6228	67.3748	55.8022	69.5261	59.3775	54.5481	31.9693	49.2301	37.934
EVM0022515	2	Function unknown	1.34141	67.5943	1.12798	21.9437	4.44484	3.34883	1.04817	7.33335	39.0644	0.0624583	28.5223
EVM0006429	2	selenium-binding protein 2-like	1.65552	7.71604	3.9275	2.47508	2.25657	2.19992	2.95472	6.51034	0.779118	1.22596	1.46115
EVM0004296	2	PREDICTED: exocyst complex component EXO70B1-like	0.125526	0.713244	0.399875	0.295784	0.314591	0.188746	0.0675187	0.17277	0.125849	0.256976	0.005291
EVM0016213	2	ATP sulfurylase 1, chloroplastic-like	50.3274	196.835	121.184	73.9566	24.0025	31.0721	11.0968	106.306	23.2997	69.8962	38.2784
Liquidambar_formosana_newGene_3696	2	hypothetical protein GOBAR_DD07835 [Gossypium barbadense]	1.60231	5.45215	3.18527	1.23145	0.88934	0.963509	2.84084	3.23218	1.03941	1.166	1.11465
Liquidambar_formosana_newGene_4496	2	Function unknown	0.747518	2.28632	1.96393	1.99726	1.70672	1.43328	1.41108	1.68595	1.08942	0.89036	1.6053
EVM0009610	2	PREDICTED: protein argonaute 16	13.1598	22.3342	14.5094	12.3122	9.24402	8.74522	6.50107	6.91312	1.78069	3.87683	6.90208
EVM0003117	2	putative UPF0481 protein At3g02645	0.138709	6.22575	3.52082	1.45969	0.0627617	0	0.07874	0	0	0	0.164214
EVM0020653	2	subtilisin-like protease SBT5.3	0.753858	7.11912	2.36691	0.549827	0.020822	0.0114267	0.058702	0.0949923	0.116648	1.31358	1.37
EVM0004052	2	PREDICTED: putative calcium-transporting ATPase 13, plasma membrane-type	0.831067	4.7964	2.55789	0.668994	0.467337	0.385424	0.573575	0.889583	0.751926	1.49831	2.54137
EVM0012115	2	PREDICTED: uncharacterized protein LOC104596483	0.407304	6.5055	3.69611	0.532793	0.650523	0.296673	0.375828	0.047341	0.0197387	0.288671	2.87151
EVM0005564	2	Alpha-crystallin, subunit A [Trema orientalis]	0.27994	4.20876	2.61362	1.87568	0.756114	0.873583	0.707741	0.444437	0	0.088211	0.225769
EVM0021323	2	putative membrane protein insertion efficiency factor [Corchorus capsularis]	1.39118	4.08439	3.00459	2.6817	1.69964	2.18208	2.17924	1.47852	1.78876	1.04983	1.0386
EVM0020732	2	hypothetical protein POPTR_002G240700v3	6.55089	87.6056	43.323	8.72915	5.16588	16.9412	30.5278	71.1878	1.88271	0.8686	2.77345
EVM0023892	2	glutathione S-transferase F13	53.5708	211.049	114.88	116.807	71.5238	116.338	95.227	73.8667	5.35907	44.3749	27.5488
EVM0006364	2	PREDICTED: uncharacterized protein LOC103329471 [Prunus mume]	0.673747	1.8817	1.13984	0.340494	0.159846	0.211051	1.00258	0.672049	0.067672	0.269946	0.266812
EVM0019891	2	calmodulin-like protein 11 [Jatropha curcas]	18.0343	142.421	83.118	64.1747	24.5127	8.05766	11.569	6.81398	1.59311	8.15941	1.99986
EVM0024053	2	uncharacterized protein LOC112026477	6.33607	87.8793	28.2944	6.35456	2.53302	5.69459	18.9512	68.2205	2.51308	3.42234	2.81937
EVM0008550	2	UDP-3-O-[3-hydroxymyristoyl] glucosamine N-acyltransferase LpxD [Parasponia andersonii]	8.89254	13.3613	9.83842	8.20843	8.49744	10.1338	8.10675	9.4661	7.20365	6.42847	8.01422
EVM0002999	2	PREDICTED: E3 ubiquitin-protein ligase ATL23	0	7.15181	0.543492	1.73114	1.90482	0.853972	0.726026	1.71135	5.05947	0.0477663	0.391997
EVM0015540	2	putative protease Do-like 14	13.1902	20.7528	14.9629	12.0284	9.63803	12.8833	9.80318	8.75594	6.21502	10.0689	8.02724
EVM0014532	2	PREDICTED: homeobox-leucine zipper protein HAT4	6.96537	20.7755	3.26242	10.9967	6.26348	9.85868	9.85822	11.2145	0.415722	2.6324	6.12976
Liquidambar_formosana_newGene_988	2	Function unknown	1.07175	4.26003	2.66578	0.956166	1.65466	2.3277	1.73599	1.47035	2.4815	1.2774	2.17085
EVM0001769	2	Cytochrome c oxidase subunit Vc [Macleaya cordata]	3.2469	13.697	6.59173	4.86116	6.66191	5.15002	5.39088	6.34526	1.62221	2.64866	1.74375
EVM0012044	2	PREDICTED: uncharacterized protein LOC100246895	3.27168	61.3135	18.3668	4.2676	1.09325	3.32514	12.2958	48.6101	1.47614	1.63819	1.58417
EVM0019055	2	protein C2-DOMAIN ABA-RELATED 4-like	23.1292	283.189	190.585	111.989	123.82	126.939	125.336	73.7594	62.3482	43.6257	85.6759
EVM0008386	2	5&apos;-adenylylsulfate reductase 3, chloroplastic-like	13.626	220.681	142.138	56.8608	39.5278	93.7632	48.8013	165.108	21.5617	25.3945	16.6949
EVM0012029	2	unnamed protein product [Coffea canephora]	35.9632	227.832	96.2241	30.2934	21.8078	33.9969	83.6404	170.466	7.61141	15.2086	11.2442
Liquidambar_formosana_newGene_1822	2	Function unknown	0.999646	1.89133	1.29237	0.58997	1.04043	0.824235	1.14182	1.09794	0.643312	0.471037	0.850798
Liquidambar_formosana_newGene_4212	2	Function unknown	0.529122	1.18177	0.800014	0.658505	0.3612	0.384627	0.357096	0.409982	0.0510703	0.140825	0.251778
EVM0016817	2	tyrosine aminotransferase	10.1076	61.8394	37.1535	22.828	10.1623	7.56891	6.70448	8.11291	2.73449	0.52091	0.962755
Liquidambar_formosana_newGene_11096	2	uncharacterized protein LOC111996828	1.19573	6.78424	1.79478	0.935655	0.795233	0.866421	5.27219	0.618777	0	0.170505	0
EVM0026034	2	uncharacterized protein LOC105649266 [Jatropha curcas]	2.2449	177.583	10.5941	0.560111	1.41027	4.00688	13.1938	28.554	0.163321	0.0286363	0.678425
EVM0001307	2	hypothetical protein CFOL_v3_13386	111.721	232.709	88.9243	122.706	74.9973	99.1449	115.088	127.505	34.6991	82.0769	75.7711
EVM0013086	2	PREDICTED: homeobox-leucine zipper protein ATHB-52	0.200799	20.423	0.0299583	0.630096	0.066709	0.144596	0.316865	1.09462	0.140181	0.156233	5.02352
EVM0009174	2	Isopenicillin N synthase [Trema orientalis]	0.295923	4.1231	1.57255	0.341258	0.775423	0.971806	2.46538	3.02702	0	0.0919983	0
EVM0009897	2	hypothetical protein B456_005G056700 [Gossypium raimondii]	6.4599	10.8261	6.19026	6.70532	5.16705	6.69775	6.97387	6.98579	3.59268	5.23461	4.19458
EVM0029090	2	PREDICTED: glutathione S-transferase L3	47.327	132.727	49.3173	30.8286	32.3383	31.6807	71.5846	63.4357	20.1241	17.3368	10.2775
Liquidambar_formosana_newGene_5439	2	PREDICTED: 21 kDa protein	0	5.58235	1.21952	1.39496	3.20404	2.50871	1.76268	0.979232	0	0	0
EVM0005154	2	PREDICTED: uncharacterized protein LOC103926661 [Pyrus x bretschneideri]	6.21312	18.9128	10.3723	4.97628	5.95218	9.12311	3.73598	3.55086	0.934957	1.58936	0.296223
EVM0014199	2	PREDICTED: ribonucleoside-diphosphate reductase large subunit [Phoenix dactylifera]	3.11917	27.6239	4.08456	1.95338	4.65132	4.05845	6.76857	3.49301	0.00585067	0.113042	0.21517
EVM0012817	2	uncharacterized protein LOC100263794	86.0526	218.311	18.365	48.0673	10.9632	7.39133	52.0606	89.0974	23.2837	1.27797	1.02156
Liquidambar_formosana_newGene_14221	2	Function unknown	1.58237	3.37392	1.05232	2.38799	1.02977	2.13468	1.78672	1.79895	0.577619	0.146126	0.639458
EVM0017414	2	PREDICTED: LRR receptor-like serine/threonine-protein kinase ERL2	1.74826	15.0173	2.83833	4.00468	4.6481	8.38707	3.77469	6.53881	0.250662	0.16456	6.79557
EVM0019753	2	PREDICTED: putative methyltransferase At1g22800	5.41939	12.3081	6.35849	8.08791	7.56711	9.02449	7.80407	6.89538	3.6308	5.58239	7.07538
EVM0015163	2	PREDICTED: death-associated inhibitor of apoptosis 1-like	4.75674	12.8927	6.06621	5.71038	5.89202	6.10197	4.76029	1.75653	0.054512	2.06515	0.633996
EVM0011840	2	late embryogenesis abundant protein At1g64065-like	12.2974	33.8576	15.9856	5.11393	7.36136	5.43085	3.95131	2.27727	0.631543	8.40933	0.879978
EVM0016804	2	PREDICTED: 5&apos;-adenylylsulfate reductase 3, chloroplastic	17.2279	159.783	123.15	58.3257	24.6224	56.8523	30.9636	114.508	41.4597	40.3206	32.9132
EVM0010864	2	PREDICTED: adenylyl-sulfate kinase 3 isoform X1 [Prunus mume]	19.2808	56.1893	36.9131	9.25297	6.95704	14.7478	26.0672	57.6033	8.32432	11.2151	20.1147
EVM0002489	2	hypothetical protein POPTR_0015s08460g	8.69239	19.9389	7.86027	8.81821	6.81897	9.48289	6.18202	5.19239	2.0907	5.84322	3.73669
EVM0013794	2	PREDICTED: protein ACCELERATED CELL DEATH 6	1.21572	86.6885	3.74751	0.505746	0.537703	2.59518	16.7622	30.1153	0.0343733	0.936713	0
Liquidambar_formosana_newGene_10135	2	PREDICTED: uncharacterized protein LOC100245348	0.240729	1.72847	0.798055	0.811695	0.412186	0.735558	1.33113	0.79232	0.0922783	0.199858	0.0938423
Liquidambar_formosana_newGene_11273	2	Function unknown	2.96209	7.83838	4.08232	3.95655	2.93473	4.64575	2.65874	2.07152	0.400065	1.16397	0.90486
EVM0020298	2	unnamed protein product, partial	278.501	663.34	121.084	290.637	183.749	293.609	158.863	179.005	3.87997	122.884	12.5027
Liquidambar_formosana_newGene_6031	2	Function unknown	3.93478	10.7426	2.74949	5.04492	4.03057	6.01698	4.72101	3.02952	0.562766	2.85897	1.05223
EVM0005438	2	PREDICTED: osmotin-like protein	77.8673	146.44	49.9834	72.8171	95.4981	61.8413	75.2377	63.2271	0.0506223	6.99321	66.8332
EVM0023294	2	UDP-galactose transporter 1 [Prunus persica]	61.169	99.4207	68.1248	67.3057	53.4403	67.4647	66.4549	61.6341	28.8391	59.9065	42.8286
EVM0018799	2	ATP sulfurylase 1, chloroplastic-like	80.1172	322.668	222.5	142.2	32.9262	44.0738	15.919	124.059	37.8917	82.9127	45.9234
Liquidambar_formosana_newGene_2055	2	PREDICTED: twinkle homolog protein, chloroplastic/mitochondrial	4.78407	6.79171	3.24024	4.2854	3.23784	4.23642	3.77389	3.71026	4.65695	2.95784	3.88328
EVM0023599	2	PREDICTED: uncharacterized protein LOC100250039 isoform X3	16.1851	22.4548	11.2906	18.5629	16.6491	15.3936	18.9492	17.987	12.5581	15.5925	15.0479
EVM0026058	2	thioredoxin-like 3-3 isoform X1	13.8764	28.8054	10.4757	15.9975	17.0651	19.7459	19.3024	18.4141	13.8226	13.6722	10.4755
EVM0007607	2	uncharacterized protein LOC112001503 isoform X1	3.59864	5.51315	2.02953	3.19521	2.66374	2.91553	3.73366	2.74437	2.86753	2.13763	2.5745
Liquidambar_formosana_newGene_1173	2	glucose-induced degradation protein 8 homolog isoform X1 [Sesamum indicum]	0.823287	1.85965	1.25761	0.46172	0.934729	1.05246	0.854028	0.478451	0.339407	0.689019	0.766771
EVM0004714	2	PREDICTED: pentatricopeptide repeat-containing protein At2g13600	1.24323	2.26749	1.49154	1.03958	1.14314	1.38302	0.760654	1.15999	0.652655	1.17518	0.913093
Liquidambar_formosana_newGene_13719	2	Function unknown	1.06472	2.22876	0.744389	1.04564	0.746707	1.49047	0.653567	0.719757	0.149245	0.653659	0.23342
EVM0028357	2	acyl-CoA-binding protein	380.71	808.78	316.101	281.521	249.538	284.727	273.804	296.018	210.749	289.813	206.948
EVM0003714	2	nitrate/nitrite transporter, partial	0.00996867	0	0.0480233	0.0484827	0.1297	0.445635	0.418693	0.735949	0.208385	0.094758	0.0644367
EVM0009856	2	protein DETOXIFICATION 33 [Jatropha curcas]	30.6675	64.8242	9.71406	42.9945	21.9388	39.3999	28.6661	33.1095	11.2608	26.9436	14.9117
EVM0008725	2	hypothetical protein POPTR_003G200700v3	1.29596	196.535	21.7469	26.5566	8.31463	5.85479	17.5634	2.34526	0.75397	75.0244	0.0325727
EVM0015144	2	PREDICTED: peptide methionine sulfoxide reductase B5-like	35.4742	62.8297	32.0996	22.5794	10.2728	16.8098	22.688	34.5307	21.9487	23.9372	27.7103
Liquidambar_formosana_newGene_9787	2	PREDICTED: uncharacterized protein LOC100852760	2.14692	6.97489	2.66607	4.41733	5.00801	1.91456	4.32565	3.54216	0.144913	0.484399	1.21105
EVM0019966	2	PREDICTED: putative laccase-9 [Eucalyptus grandis]	3.12269	14.5335	1.91518	3.24795	0.35168	0.787596	0.220146	0.511919	0.699991	4.12682	0.46467
EVM0011704	2	PREDICTED: uncharacterized protein LOC100244201	9.54726	33.8584	21.2589	19.1834	16.4774	17.6277	27.7718	20.7622	2.76241	9.99112	19.3743
EVM0009353	2	fatty-acid-binding protein 1	3.21958	5.2695	3.48882	2.9512	2.41951	3.68804	2.69957	3.15132	4.54483	2.65438	3.52752
EVM0012075	2	--	41.3312	82.4777	38.6334	40.082	40.699	59.1197	39.8982	38.8195	26.7034	41.6992	31.4634
Liquidambar_formosana_newGene_3694	2	hypothetical protein GOBAR_DD07835 [Gossypium barbadense]	15.5905	38.6853	14.4266	7.78543	5.58518	7.19157	23.1353	36.5622	6.43798	9.61249	9.24457
EVM0007822	2	protein preY, mitochondrial	16.434	34.5287	19.5563	15.4634	11.5847	18.2765	12.795	10.1879	9.76826	17.7292	14.5598
Liquidambar_formosana_newGene_14729	2	Function unknown	1.08903	3.68383	2.1878	1.53914	2.03461	1.77876	1.84657	1.70902	0.497647	1.16538	0.91714
EVM0015814	2	PREDICTED: 3-isopropylmalate dehydrogenase, chloroplastic	21.4426	30.4856	17.4737	18.6126	15.643	17.1991	15.3271	11.9442	12.2159	13.6716	17.069
EVM0006991	2	PREDICTED: protein TIC 56, chloroplastic	25.2548	31.0485	24.9451	22.0206	23.0583	27.2812	26.7274	22.5588	30.2721	21.5278	22.0545
Liquidambar_formosana_newGene_13061	2	Function unknown	0.49417	1.80721	0.747272	1.02632	0.846917	1.45115	0.918161	0.909257	0.39213	0.95783	0.70894
EVM0014791	2	acidic mammalian chitinase-like [Durio zibethinus]	6.4756	13.0519	9.89913	6.37827	5.90388	5.89203	4.43155	5.83136	11.6724	2.97143	2.62789
EVM0010471	2	telomerase Cajal body protein 1-like	11.03	18.1439	12.3176	10.4207	9.92823	12.4519	9.68427	11.2991	5.03329	9.01693	8.64271
Liquidambar_formosana_newGene_13272	2	Function unknown	0.106738	6.13502	4.02992	2.75872	2.34053	2.52365	0.798965	0.866283	0.0153907	0.0174627	0.110546
EVM0023418	2	mitochondrial metalloendopeptidase OMA1-like	1.12176	3.88131	2.55043	1.10784	1.78416	1.38488	0.654584	0.535458	0.0643757	0.147901	0.219297
EVM0002339	2	hypothetical protein CFP56_39425	21.9082	39.8447	22.1709	29.5996	28.3289	26.3963	32.5359	34.3518	17.42	29.287	26.3752
Liquidambar_formosana_newGene_12725	2	Function unknown	0.490692	2.21931	0.581382	0.483687	1.23145	1.23347	1.21625	0.858866	0.840458	1.16742	0.549769
EVM0018190	2	--	48.2661	74.3327	42.7079	42.2156	37.373	52.675	34.6542	37.8288	24.502	40.8932	29.021
Liquidambar_formosana_newGene_11043	2	Function unknown	3.30118	8.52103	1.73625	0.187907	0	0.025414	0	0	0	0	0
EVM0012304	2	PREDICTED: STS14 protein	26.3618	85.9388	9.72833	46.9757	32.184	35.0463	41.8173	60.3974	0.52913	7.79059	29.4136
Liquidambar_formosana_newGene_2076	2	PREDICTED: uncharacterized protein LOC105108231 isoform X3	0.0300407	1.70829	0.77678	0.269105	0.363476	0.905177	0.536581	1.53241	0	0	0
EVM0012033	2	RNA polymerases N / 8 kDa subunit [Theobroma cacao]	84.8514	124.52	75.8701	61.3409	58.8053	80.8444	61.3545	61.5813	50.3015	59.0194	65.5299
EVM0011233	2	probable small nuclear ribonucleoprotein F	41.4232	80.8847	27.8586	33.8746	35.2361	53.883	39.8508	33.3818	28.2186	28.3634	31.4628
EVM0003701	2	PREDICTED: non-specific lipid-transfer protein-like protein At5g64080 [Lupinus angustifolius]	82.2522	222.528	47.2553	63.3736	96.5497	130.768	61.2581	45.3402	13.0757	38.4319	143.998
EVM0020884	2	PREDICTED: actin-related protein 4 isoform X2	42.2254	57.943	37.689	40.0903	32.0719	43.3648	33.9934	33.6655	27.1772	34.6926	39.5088
EVM0018227	2	hypothetical protein POPTR_0019s13150g	6.00545	29.1372	8.53267	8.58542	23.6476	10.7968	8.58399	3.46928	0	5.97598	7.87575
EVM0008649	2	PREDICTED: DNA-binding protein RHL1	15.5004	22.2802	9.64842	14.952	12.8699	12.1611	14.6509	15.3203	19.1681	12.587	15.2668
EVM0004462	2	DNA methylase, N-6 adenine-specific, eukaryotic	10.4736	19.3817	8.91001	10.3834	9.48659	11.6018	11.4139	11.0348	8.56305	11.0449	12.8869
EVM0023506	2	protein TRIGALACTOSYLDIACYLGLYCEROL 1, chloroplastic	23.4596	29.0845	18.3075	22.5269	19.3724	22.072	18.4415	20.219	19.6998	19.0242	19.008
EVM0013779	2	PREDICTED: auxin-responsive protein IAA4-like	24.2946	38.9257	7.93286	7.86285	7.57739	7.59806	16.6487	16.1703	1.21451	1.15785	5.11093
EVM0003929	2	protein arginine methyltransferase NDUFAF7, mitochondrial [Jatropha curcas]	12.0949	19.367	12.5044	10.8547	10.2307	11.5449	9.10927	7.92084	8.47238	12.4733	8.00407
EVM0029395	2	PREDICTED: uncharacterized protein LOC100261846	0.567835	162.155	11.1823	15.4818	34.046	95.1374	70.7606	56.1793	0.998641	0	0.0926177
EVM0019155	2	unnamed protein product, partial	6.01476	9.98881	8.14751	5.25695	6.44153	7.74701	5.28553	4.42302	4.80798	3.31586	5.60601
EVM0008773	2	probable leucine-rich repeat receptor-like protein kinase At5g49770	0.145874	10.5749	0.721823	0.2625	0.0135657	0	0.0149837	0.0180987	0.047458	3.73156	0.0266197
EVM0005465	2	PREDICTED: uncharacterized protein LOC108219697 [Daucus carota subsp. sativus]	126.776	271.248	77.3154	105.008	104.886	141.397	125.908	138.17	73.6702	127.42	107.821
EVM0018405	2	PREDICTED: ABC transporter G family member 15	0.0623933	23.8943	6.53017	11.3516	10.0149	11.8331	12.1776	12.5412	0.200238	0.112421	2.04747
Liquidambar_formosana_newGene_8811	2	hypothetical protein VITISV_021650	1.01794	2.74425	0.740041	0.860803	1.56525	1.42404	1.14456	1.0015	0.040315	0.0742503	0.374378
EVM0018918	2	PREDICTED: 39S ribosomal protein L54, mitochondrial [Eucalyptus grandis]	4.9801	9.43443	6.35575	4.31021	6.83263	4.67238	5.55881	5.67372	3.30174	3.93981	1.65564
Liquidambar_formosana_newGene_2053	2	Function unknown	0.646223	3.21733	0.838613	0.938651	2.19971	1.34893	1.70005	1.54508	0.361902	0.038318	0.755102
EVM0008578	2	PREDICTED: octanoyltransferase isoform X1	7.41192	10.3176	6.31045	6.19741	6.14499	8.19321	6.86612	6.67116	8.58888	5.88075	8.05697
EVM0009403	2	leucine-rich repeat receptor protein kinase EMS1-like	0.0198843	0	0.048057	0.011726	0.019515	0.0143073	0.030749	0.155936	0.0313243	0.309712	0.42944
EVM0018857	2	dihydroflavonol 3&apos;-hydroxylase 3 [Paeonia lutea]	3.71797	25.0261	7.78546	11.7759	14.7234	11.4713	9.83762	12.0992	0.127434	6.3309	0.0942793
EVM0011304	2	PREDICTED: uncharacterized protein LOC103420558	1.15607	2.86059	0.465529	1.0583	1.27668	1.62352	1.79975	1.79912	1.07083	0.916745	1.03522
EVM0001485	2	PREDICTED: uncharacterized protein LOC100242796 isoform X2	3.69013	6.7379	5.95192	5.7681	5.55629	5.79361	5.11731	5.42106	5.34791	5.58128	4.59783
EVM0027612	2	Function unknown	53.4361	270.374	60.6728	62.6598	150.272	118.439	186.384	190.004	84.8804	45.0286	47.5952
EVM0000086	2	PREDICTED: DNA-directed RNA polymerases II, IV and V subunit 9A	39.4413	61.0853	22.2706	31.313	27.1899	33.2028	32.9588	30.3996	13.8976	23.4596	20.7945
EVM0002302	2	PREDICTED: 1,2-dihydroxy-3-keto-5-methylthiopentene dioxygenase 2	176.523	282.296	148.525	146.922	170.769	152.222	224.079	265.735	135.29	180.765	141.69
EVM0026426	2	PREDICTED: uncharacterized protein LOC100855084 isoform X2	4.07162	9.55219	5.35804	4.72919	4.57083	5.43931	5.22383	7.2507	1.32587	2.35214	2.90165
EVM0005660	2	PREDICTED: uncharacterized protein LOC109020089 isoform X2	0.345892	2.70957	0.84267	0.656112	0.913387	1.25145	1.85158	2.41961	0.286254	0.596888	1.2473
EVM0026556	2	PREDICTED: uncharacterized protein LOC100260621 isoform X1	1.85932	4.40777	2.4026	2.53352	2.44643	4.1965	2.81581	2.87419	3.34951	0.759936	1.85936
EVM0001631	2	SANT/Myb domain [Macleaya cordata]	1.33275	5.4634	0.23089	0.031339	3.15634	1.2911	3.73448	2.20887	0.0354857	0.314503	0
EVM0025693	2	PREDICTED: recQ-mediated genome instability protein 2 isoform X2	10.2481	17.9438	8.50301	6.88031	7.8725	10.9358	9.47971	9.05445	3.43928	6.40473	6.93523
EVM0002921	2	PREDICTED: 3-ketoacyl-CoA synthase 12-like	0.090364	6.1933	0.786725	0.97053	1.12761	3.00764	2.54124	6.1855	0.0502	0.076112	1.41273
EVM0022394	3	hypothetical protein JCGZ_05747 [Jatropha curcas]	0.136194	0.184653	7.44626	0.0825683	0.622398	2.04129	0.204617	0	0.979153	0.046525	0
EVM0008261	3	Function unknown	0.821351	0.528242	6.1043	1.77987	0.61882	0.102293	1.05853	2.29238	0.367557	0.099033	0.0491863
EVM0027179	3	F-box protein At4g22280-like isoform X1	3.51583	4.15679	12.4359	4.12433	4.55125	5.62954	5.49562	5.30153	1.88794	4.93825	2.42731
EVM0015370	3	uncharacterized protein LOC110765447	0.637383	2.80094	6.72635	1.32083	1.41668	0.828659	0.732882	1.06885	1.998	0.795028	0
EVM0024876	3	unnamed protein product, partial	1.71385	1.13548	4.79292	2.29516	1.98118	2.07983	1.5208	2.24806	0.971476	1.03124	1.88186
EVM0025421	3	Cytochrome P450, putative [Theobroma cacao]	0.641317	1.8779	4.31393	1.60916	1.3149	0.73927	0.671453	0.375117	0	0.787845	0.0813223
Liquidambar_formosana_newGene_4159	3	uncharacterized protein LOC110751541	0.0388993	0.338316	1.77223	0.474235	0.18703	0.369721	0.219281	0.391648	0.161238	0.123452	0.020275
EVM0001421	3	glucan endo-1,3-beta-glucosidase-like	0.947463	5.73986	15.295	2.07891	4.5191	4.70763	0.815947	0.532862	0.534969	0.453845	0.462029
EVM0008421	3	G-type lectin S-receptor-like serine/threonine-protein kinase LECRK4	1.09152	1.75209	3.39505	0.690695	1.38577	1.47419	1.17615	1.329	0.44762	0.0693353	0.816065
EVM0008428	3	PREDICTED: probable pectinesterase/pectinesterase inhibitor 25	1.50561	4.16396	44.9147	12.3011	7.37827	4.15389	14.4911	17.7179	0.473625	6.83021	10.0004
EVM0000443	3	TPS01 [Liquidambar formosana]	0	0.116038	5.53818	0.118216	0.26134	0.121251	0.0346407	0	0.328939	1.51902	0.997122
EVM0002240	3	hypothetical protein DCAR_008199 [Daucus carota subsp. sativus]	0.291097	3.0891	7.73159	1.65242	1.90526	2.89766	0.993891	0.919147	1.13603	3.58038	2.22317
EVM0021756	3	PREDICTED: F-box/LRR-repeat protein 2	0.355347	0.640676	1.72668	0.777698	0.955306	0.559025	0.737218	0.590662	0.307231	0.188712	0.553624
EVM0006997	3	PREDICTED: heat shock cognate 70 kDa protein 2-like	7.56362	7.72401	22.2819	14.0612	11.5907	7.51088	11.0673	11.5705	9.08778	13.113	9.79767
EVM0019908	3	PREDICTED: probable WRKY transcription factor 50	5.29291	3.97758	24.6828	3.32277	3.5087	7.17123	4.84272	15.0612	2.82066	7.93047	2.66536
EVM0000108	3	PREDICTED: probable receptor-like protein kinase At5g39020 [Solanum tuberosum]	1.17418	1.59256	2.82066	1.57049	1.55985	1.62097	1.27931	1.59394	1.94199	1.03145	1.7091
EVM0008078	3	rna polymerase ii c-terminal domain phosphatase-like 3	4.46077	3.54502	9.42853	5.00806	4.12247	3.11508	2.82721	4.09954	4.92938	4.08065	4.26367
EVM0027321	3	PREDICTED: rust resistance kinase Lr10-like	0.727884	1.50826	15.9507	2.20918	3.35697	1.96982	4.31762	1.33795	0.447166	0.169553	0.14346
EVM0004126	3	ABA transporter [Camptotheca acuminata]	1.627	5.63703	15.5054	9.01982	6.66998	5.41401	5.23162	3.74146	6.24938	4.47077	6.2777
EVM0007477	3	hypothetical protein POPTR_0005s18200g	4.38895	10.1447	84.0188	10.2904	2.50653	2.10812	1.54782	2.385	1.98227	12.3597	3.43546
EVM0010715	3	hypothetical protein M569_14307 [Genlisea aurea]	0.942652	3.95039	17.4805	6.0863	7.28079	4.86287	3.60161	1.66844	0.86911	7.81961	1.43435
EVM0010711	3	PREDICTED: RING finger protein 10 isoform X1	40.0858	47.1789	61.98	41.2317	44.8563	41.7589	42.0497	48.5603	38.6331	43.9872	35.0714
EVM0025130	3	hypothetical protein VITISV_023611	0.620869	0.868996	7.77201	1.26218	1.07655	1.11659	1.35153	1.89016	0.529532	1.8863	2.03165
EVM0024772	3	PREDICTED: cysteine-rich receptor-like protein kinase 8 isoform X1 [Eucalyptus grandis]	0.902744	0.097728	2.33528	0.037989	0.36187	0.137055	0.0266207	0.233456	0	0.165095	0.041148
EVM0024773	3	transcription factor MYB15-like	0	0.687617	43.3602	6.83356	0.406391	0.1143	0.221184	0.0498247	0.269549	7.92667	1.75587
EVM0002428	3	PREDICTED: IQ domain-containing protein IQM1-like	0.369097	0.208009	7.55343	0.0428853	0.0485147	0.306042	0.020728	0.0844493	0.009093	0.0929987	0.00894533
EVM0006333	3	hypothetical protein MANES_13G037700 [Manihot esculenta]	8.73328	9.18785	23.2873	11.9748	13.7459	8.66545	6.48256	4.52706	5.84799	8.02459	5.8524
EVM0024576	3	PREDICTED: uncharacterized protein LOC108981628 isoform X2	7.08244	11.618	21.3123	13.3426	11.1233	8.42047	11.4059	9.81396	9.93429	10.3898	12.1538
Liquidambar_formosana_newGene_4877	3	Function unknown	0.489966	0.761389	1.87284	0.468934	0.687804	0.645652	0.543264	0.571668	0.219197	0.546353	0.709975
Liquidambar_formosana_newGene_7371	3	Function unknown	0.230226	0.308458	4.20484	0.220348	0.680351	0.540717	0.515868	0.553539	0.0384853	1.18424	0.126746
Liquidambar_formosana_newGene_2829	3	Function unknown	9.99317	11.2771	23.6401	13.8579	13.3493	10.3381	11.7748	14.3181	6.63254	12.0151	12.9439
EVM0003980	3	tRNA threonylcarbamoyladenosine dehydratase	6.24537	6.29057	9.18734	5.65209	5.6359	5.70531	4.99626	5.08722	4.75471	6.38683	5.27031
EVM0020215	3	PREDICTED: inositol-pentakisphosphate 2-kinase	20.1511	21.2442	40.3398	21.6725	15.6048	16.4915	17.7731	15.6772	11.4626	11.2671	14.3859
EVM0019887	3	Cysteine-rich RLK 10 [Theobroma cacao]	8.48956	4.30813	45.6519	2.5057	5.57568	4.61593	2.17833	6.56368	0.739037	0.360146	0.144325
EVM0028768	3	PREDICTED: probable E3 ubiquitin-protein ligase ATL45 [Nicotiana tomentosiformis]	0.027435	1.22268	11.7118	2.3618	1.33443	0.96497	0.654289	0.715882	0.236894	0.913548	0.524588
EVM0013841	3	unnamed protein product [Coffea canephora]	0.26519	0.44274	22.5483	0.285656	0.711806	0.70371	0.478432	0.44691	0.717629	0.497188	0.420663
Liquidambar_formosana_newGene_4484	3	Function unknown	0.50673	2.1073	4.45582	0.832148	0.0335337	0.281784	0.0555803	0.267504	0.12286	0.388084	0.188174
EVM0023055	3	heavy metal-associated isoprenylated plant protein 24 [Jatropha curcas]	0.0985083	0.113442	19.7773	0	2.15725	1.74697	2.15658	2.80745	2.80599	1.11963	0.409132
EVM0014526	3	glutathione S-transferase U14	45.0969	43.7395	154.336	18.8346	56.7157	56.5263	28.5781	17.8354	2.78729	13.8832	0.835258
EVM0020225	3	hypothetical protein CISIN_1g017221mg	33.3284	62.8717	369.315	33.7073	91.5877	92.582	110.119	94.1561	6.90753	79.0482	9.94817
EVM0025924	3	PREDICTED: purple acid phosphatase	0.098061	0.249418	3.27408	0.385133	1.48721	0.828756	0.468833	0.128237	0.162456	0	0
EVM0027657	3	PREDICTED: myosin-11	9.43373	8.8685	25.4675	12.9892	7.2423	6.32706	7.25627	6.46251	2.20615	9.98935	11.0326
EVM0009676	3	probable calcium-binding protein CML25	1.4323	2.29524	4.42572	1.58922	0.395365	0.217103	0.0748433	0.227604	1.70541	0.487759	1.11039
EVM0018553	3	PREDICTED: ankyrin repeat-containing protein At2g01680	0.944643	0.806144	3.00804	0.462085	0.981335	1.78678	1.31818	0.862173	1.35543	0.914914	0.901521
Liquidambar_formosana_newGene_13818	3	orf185	0.303242	0.62143	1.72133	1.06356	0.660933	0.902295	0.516776	0.631117	0.225688	0.143311	0.210571
EVM0022102	3	unnamed protein product, partial	8.54405	14.6309	42.1733	15.4208	19.8699	12.3329	6.75684	5.78497	2.88423	6.56958	1.46613
EVM0002768	3	PREDICTED: primary amine oxidase	0.210589	1.77492	2.65691	0.00865267	0.00641433	0	0	0	0.632704	0	0
EVM0001552	3	PREDICTED: probable indole-3-pyruvate monooxygenase YUCCA7	0.535461	8.78003	22.1835	0.720746	6.78933	5.57061	7.34148	2.45221	0	0.139026	0.00875767
EVM0022805	3	2OG-FeII_Oxy domain-containing protein/DIOX_N domain-containing protein	0.139775	0.151251	3.45258	0.165656	0.0725013	0.0414937	0.0260583	0.0329773	0.0507967	0.0887193	0.103866
EVM0027835	3	PREDICTED: uncharacterized protein LOC104591601	9.15524	11.6692	54.029	20.4159	8.73483	8.01349	2.41071	1.60845	0.087867	4.07412	0.148094
EVM0027763	3	PREDICTED: uncharacterized protein LOC100257506	5.17805	10.1145	36.0182	11.323	13.2643	11.759	11.204	7.85398	1.04548	1.67181	0.932813
Liquidambar_formosana_newGene_7169	3	PREDICTED: protein SRC2-like	0.592964	0.161259	3.74894	0.420408	0.393597	0.111458	0.102124	0.143261	0.0664357	0.432886	0.099054
EVM0003592	3	uncharacterized protein LOC110420373 [Herrania umbratica]	0.834269	3.1288	11.7873	4.90053	6.0504	4.01482	1.58517	0.633705	0.200621	3.96854	2.77968
EVM0008983	3	uncharacterized protein LOC110421786 [Herrania umbratica]	1.90184	0.453911	6.9681	0.710398	3.78881	1.88237	1.20678	1.2372	1.26313	0.7926	2.32198
EVM0026165	3	F-box/LRR-repeat MAX2 homolog A-like	0.216331	0.182402	0.712057	0.176972	0.187501	0.300644	0.0944237	0.142775	0.152328	0.248435	0.0794553
Liquidambar_formosana_newGene_8807	3	Function unknown	0.393757	0.361371	3.27508	0.555028	0.293372	0.462562	0.257667	0.314683	0.178094	0.381991	0.296253
EVM0004776	3	PREDICTED: thioredoxin M3, chloroplastic	15.9783	23.3946	75.961	26.0763	37.4477	38.6947	29.4707	24.7597	27.8797	32.7318	35.9409
EVM0022188	3	PREDICTED: F-box protein SKIP14	7.71697	7.53338	18.5077	12.1841	9.30303	10.0995	8.99418	9.45276	5.29017	8.38124	5.0087
EVM0013689	3	hypothetical protein CISIN_1g015535mg	0.17242	0.948546	2.16246	0.883171	0.777296	0.736629	0.313816	0.345594	0.334007	0.796208	0.42463
EVM0000285	3	unknown protein	21.5521	30.9082	49.5025	29.3974	26.8298	29.1051	21.7775	18.3198	16.9227	19.3802	11.7894
EVM0014871	3	PREDICTED: probable calcium-binding protein CML41	2.52118	2.161	4.83459	0.739656	1.29984	2.41535	1.31257	1.74206	0.287861	0.766126	1.36768
EVM0006538	3	PREDICTED: putative leucine-rich repeat receptor-like serine/threonine-protein kinase At2g24130 isoform X1 [Solanum tuberosum]	0.555239	0.0223393	1.45825	0.304889	0.120424	0.167607	0.0862493	0.637755	0.509276	0.222262	0.390887
EVM0006539	3	PREDICTED: mitogen-activated protein kinase kinase kinase YODA-like [Nicotiana attenuata]	0.47713	0.444277	2.46857	0.8314	1.06602	0.581468	1.04352	0.793668	0.547411	0.643333	0.328902
EVM0006284	3	Immunoglobulin-like fold containing protein [Parasponia andersonii]	1.58354	1.0581	8.379	0.703611	0.117816	0.0328107	0.0306773	0.390694	1.10084	1.0814	0.433498
EVM0017019	3	Function unknown	12.9747	6.87477	50.5797	13.5179	1.77779	0.908521	0.4497	0.440718	0.192053	12.2316	1.85925
EVM0000593	3	PREDICTED: IAA-amino acid hydrolase ILR1-like 6	28.6037	7.92253	82.9025	15.4695	40.5868	21.7721	19.9768	20.3928	21.3419	32.7166	25.1595
Liquidambar_formosana_newGene_11753	3	hypothetical protein CDL15_Pgr025681 [Punica granatum]	1.99836	2.39932	4.55193	2.52664	1.88814	1.64978	1.4908	2.19865	0.451402	2.22946	1.43472
EVM0018987	3	probable calcium-binding protein CML47	0.888752	2.98226	10.5572	1.72049	1.45304	2.13484	0.173738	5.03073	0.10207	0.534502	0.60964
EVM0022613	3	PREDICTED: helicase SEN1	0.279142	0.443698	2.71867	0.066222	0.493784	1.69118	0.284842	1.20705	0.121406	0.390454	0.369637
EVM0022615	3	PREDICTED: probable calcium-binding protein CML30	0.452327	1.28435	18.0875	2.61585	0.852399	1.66473	0.584167	1.83728	0.307729	0.629727	0.451681
EVM0008296	3	unnamed protein product, partial	1.23189	4.1743	22.0093	5.56639	1.46045	0.486665	0.134122	0.230355	0.302772	4.59291	1.14221
EVM0017221	3	PREDICTED: MDIS1-interacting receptor like kinase 2	0.179584	0.842016	6.2704	1.15566	0.130757	0.604972	0.220253	0.742295	0.318762	0.533547	0.328523
EVM0020458	3	PREDICTED: phospholipase A1-Igamma1, chloroplastic-like [Pyrus x bretschneideri]	8.01961	13.1874	27.1704	14.4062	14.8529	9.53441	4.98487	2.74077	4.36447	10.6229	3.3777
EVM0020186	3	PREDICTED: GABA transporter 1-like [Prunus mume]	4.51345	5.67552	18.5198	4.86147	5.34091	5.70682	3.39648	1.96701	4.21275	0.63438	0.211774
Liquidambar_formosana_newGene_8396	3	Function unknown	4.14913	5.79344	23.8969	13.7584	6.0387	5.2064	9.72439	7.80329	6.1605	6.80521	3.48714
EVM0017766	3	PREDICTED: uncharacterized protein LOC104881134	5.10035	6.09556	10.9492	4.98732	1.13139	0.713899	1.99512	11.4782	4.79679	1.68646	0.336205
EVM0023888	3	probable xyloglucan galactosyltransferase GT11	0.610983	0.249244	1.378	0.536546	0.367965	0.21192	0.0295237	0.00810633	0.174617	0.276613	0.066534
EVM0013052	3	PREDICTED: UDP-glycosyltransferase 87A1	0.34989	0.414614	10.8843	0.264469	0.978661	1.35118	0.768263	0.867632	4.10303	0.430606	0.940747
EVM0014441	3	PREDICTED: probable alpha-mannosidase At5g13980	0.357604	0.278176	0.882002	0.289328	0.0884927	0.21376	0.039172	0.432705	0.107742	0.123593	0.0823647
Liquidambar_formosana_newGene_1826	3	PREDICTED: G-type lectin S-receptor-like serine/threonine-protein kinase At1g11330 [Theobroma cacao]	1.45348	0.410532	3.92082	0.0241973	0.302238	0.86219	0.0524683	0.369754	0.481075	0.278761	0.32439
EVM0026483	3	PREDICTED: probable galacturonosyltransferase-like 1	15.8086	12.3226	52.2958	14.8296	19.3199	13.0553	12.4052	10.5972	0.916281	16.6686	17.9661
EVM0018726	3	PREDICTED: histone H1 [Ricinus communis]	175.201	191.777	558.1	194.303	251.991	205.159	227.651	260.86	123.189	92.4115	84.6363
EVM0018729	3	G-type lectin S-receptor-like serine/threonine-protein kinase LECRK2 [Manihot esculenta]	1.54979	5.22049	15.2213	2.7756	0.986718	1.46934	1.88139	1.12022	0.65318	0.760818	1.39089
EVM0022480	3	PREDICTED: NEP1-interacting protein 1	23.914	32.0185	107.268	34.7683	50.0115	35.3579	55.9427	47.243	30.2279	29.1076	38.9144
EVM0019453	3	PREDICTED: chitinase 2-like	7.36931	14.6419	61.6486	14.935	5.64064	5.73907	2.75262	7.70312	21.517	1.95455	2.1563
EVM0000172	3	PREDICTED: suppressor of RPS4-RLD 1	34.4156	27.035	63.0213	41.6826	35.742	26.2552	29.8578	33.6352	29.6349	35.4508	29.7821
Liquidambar_formosana_newGene_3726	3	Function unknown	14.1181	81.129	467.487	132.499	88.1318	56.3891	45.4156	31.892	52.7651	163.169	37.0937
EVM0002927	3	hypothetical protein MANES_16G017800 [Manihot esculenta]	2.35099	6.02425	17.9745	6.24751	7.73938	5.14018	3.03356	1.96424	0.732235	1.33749	0.151738
EVM0021979	3	PREDICTED: uncharacterized protein LOC109010426 isoform X2	1.52289	2.71018	5.84946	1.94584	1.59188	1.68846	0.98802	0.812703	0.160541	0.469572	0.291327
Liquidambar_formosana_newGene_1243	3	Function unknown	0.365395	1.04119	2.60053	0.424514	0.100824	0.022045	0.0773827	0.157109	0	0.102616	0.0276573
EVM0006773	3	PREDICTED: uncharacterized protein LOC102611481	0.760295	3.8799	14.7389	2.44038	2.9982	5.60998	2.33742	3.63853	0.499344	0.791999	3.45469
EVM0015507	3	F-box protein PP2-B10-like [Olea europaea var. sylvestris]	16.5874	16.8344	33.833	12.8459	13.6752	12.0746	12.1939	6.61399	1.8703	10.5204	1.29306
EVM0018688	3	EF_hand_5 domain-containing protein	15.2937	40.0001	125.674	40.878	62.6633	38.3153	30.6214	24.563	57.7298	53.887	33.3539
EVM0013812	3	hypothetical protein VITISV_013371	0.96537	0.654497	1.90358	0.717894	0.780698	0.832644	0.769178	0.612669	0.272879	0.450247	0.63413
EVM0001107	3	PREDICTED: UDP-glycosyltransferase 87A1	3.63335	7.08501	33.482	7.92978	4.53717	3.5532	1.04101	0.630647	0.170543	3.44165	0.1634
EVM0012487	3	glutathione S-transferase U14	69.8998	141.691	390.206	64.0706	126.488	164.511	75.5324	63.553	62.0077	28.0514	6.27374
EVM0011254	3	Function unknown	0.451747	0.275312	1.63432	0.592776	0.556204	0.354253	0.283512	0.743774	0.369753	0.400584	0.096734
EVM0011926	3	F-box/kelch-repeat protein At3g23880-like	0.018876	0.213205	1.26722	0.322287	0.578121	0.638235	0.017287	0.507901	0.0512913	0.0430773	0.604982
EVM0006941	3	hypothetical protein POPTR_001G226400v3	0.545236	2.85368	24.4574	12.9703	3.87593	1.46159	1.71234	0.95529	0.68223	5.82667	0.376056
EVM0003668	3	PREDICTED: MDIS1-interacting receptor like kinase 2-like	1.4368	1.81254	7.16906	1.56892	1.65897	2.65355	1.16387	1.10302	0.22392	2.41255	0.399479
EVM0011992	3	PREDICTED: uncharacterized protein LOC104587286	0.0941233	1.16029	4.36136	0.528557	1.7864	1.57066	1.37349	1.44661	0	0	0
EVM0015218	3	PREDICTED: MDIS1-interacting receptor like kinase 2	5.27094	5.21733	31.9701	13.4993	4.12184	10.3508	5.66374	10.5372	0.226426	2.06759	3.79748
EVM0003347	3	uncharacterized protein LOC112015203	0.699634	1.23786	3.18476	0.709045	0.228912	0.742696	0.058861	0.20922	0.402917	0.581805	0.0641203
EVM0020168	3	unnamed protein product, partial	2.92846	4.76314	13.6366	7.3573	4.64936	3.3703	2.29655	1.38227	2.68521	3.99167	0.440893
EVM0026872	3	PREDICTED: probable WRKY transcription factor 72 isoform X2	0.60234	0.603966	3.31288	0.729249	0.811565	0.307992	0.192483	0.248316	0	1.03754	0
EVM0011499	3	Cysteine-rich RLK 10, putative [Theobroma cacao]	0.611227	0.312488	4.30606	0.0704733	1.60601	0.309721	0.0700477	0.080378	0	0	0
EVM0023765	3	hypothetical protein POPTR_018G012100v3, partial	2.94742	4.75393	10.9714	4.2702	4.12633	4.64718	4.16593	3.37641	1.71177	3.27663	2.1806
EVM0016325	3	Mitogen-activated protein kinase kinase kinase [Trema orientalis]	0.646358	1.31174	2.48753	0.498224	0.283517	0.215728	0.123068	0.158423	1.13096	0.0203337	0.171608
Liquidambar_formosana_newGene_5520	3	putative disease resistance protein RGA3 [Prunus persica]	0.316397	0.530938	2.16422	0.355252	0.949229	0.404839	0.331326	0.54435	0	0.556287	0.018665
EVM0007334	3	PREDICTED: U-box domain-containing protein 35	9.80118	9.15881	22.0679	8.80728	9.82272	8.16526	4.60106	3.48559	2.66676	5.1348	1.4532
EVM0019072	3	hypothetical protein COLO4_30702	1.04777	1.24136	3.24363	1.49952	1.33529	0.866799	0.872717	0.421689	0.228565	0.42719	0.118502
EVM0010912	3	PREDICTED: cysteine-rich receptor-like protein kinase 19 isoform X3	1.05886	0.419513	2.3405	1.37669	0.103145	0	0	0	0	0.0328893	0
EVM0002077	3	PREDICTED: histone-lysine N-methyltransferase CLF isoform X1	13.47	14.944	31.0295	14.0545	14.0841	13.9094	9.53021	10.9186	4.26244	15.9433	10.0315
EVM0003208	3	PREDICTED: protein ALWAYS EARLY 3 isoform X1 [Nicotiana tomentosiformis]	0.656783	0.159205	1.94435	0.310642	0.780053	0.625592	0.497936	0.578935	0.229913	0.495144	0.546117
Liquidambar_formosana_newGene_9325	3	Function unknown	1.14187	1.52296	2.77848	1.26125	1.74132	1.29356	1.40733	1.24255	0.490053	1.30007	1.22061
Liquidambar_formosana_newGene_14536	3	Function unknown	0	0.28031	3.70819	0.677172	0.334869	0.291608	0.731001	0.221744	0	0	0
EVM0024456	3	hypothetical protein CISIN_1g003471mg	0.496185	1.4678	65.8577	0.295554	14.1	9.06047	9.15521	6.93974	0.288465	4.92321	1.3415
EVM0013201	3	hypothetical protein CFP56_49750	0.34434	0.458717	4.27898	0.282439	0.230712	0.0729003	0.154454	0.196865	0	0.694322	0.594747
EVM0019757	3	transcription factor bHLH115 [Morus notabilis]	8.59017	12.5218	22.5132	13.7193	11.0075	13.9864	10.7275	8.61893	7.42502	10.7571	8.73013
EVM0025194	3	RING/U-box superfamily protein, putative [Theobroma cacao]	0.229375	3.1501	22.8683	7.44407	4.93559	4.18572	0.755908	0.198584	0	3.9531	0.440132
EVM0023935	3	uncharacterized protein LOC110656602	11.6196	31.2402	111.697	43.508	21.3467	19.2055	13.1303	22.4724	12.3725	3.47174	3.43977
EVM0001404	3	PREDICTED: RNA polymerase II C-terminal domain phosphatase-like 1	8.08966	10.4943	15.0879	9.95639	9.6157	12.1208	9.1566	11.2439	8.51837	8.78562	8.70064
EVM0003716	3	hypothetical protein POPTR_0005s18200g	0.296411	1.09615	5.63311	2.12342	0.754876	0.414092	0.079491	0.146542	0.0284877	1.62396	0.0871523
EVM0007596	3	hypothetical protein VITISV_025114	0.18998	1.03712	4.41766	2.17121	1.2697	0.82302	0.471894	0.31492	0.012702	0.331874	0.086567
EVM0010998	3	PREDICTED: UDP-glycosyltransferase 87A1	13.4635	29.438	96.2803	39.5542	26.3399	24.7164	5.22014	3.17382	7.33627	26.4341	1.88031
EVM0018775	3	hypothetical protein MIMGU_mgv1a020792mg, partial [Erythranthe guttata]	4.93306	4.08461	15.9891	4.71397	3.80805	5.52381	3.11464	2.92288	1.52753	1.91792	2.49881
EVM0027205	3	Glyco_transf_8 domain-containing protein	2.08628	18.4814	414.988	6.22295	53.0944	43.3163	53.5034	36.071	38.8633	92.5005	26.7909
EVM0013821	3	TMV resistance protein N	4.83564	4.58797	17.0297	4.86854	2.42822	2.53154	1.85688	2.08106	0.717649	1.61053	2.15567
EVM0011461	3	PREDICTED: putative receptor protein kinase ZmPK1	0.760368	0.561915	2.03813	0.824076	0.126618	0.169522	0.0755453	0.076793	0	0.33805	0.015566
EVM0002447	3	PREDICTED: (-)-isopiperitenol/(-)-carveol dehydrogenase, mitochondrial	3.62329	8.90259	35.7533	11.2865	17.0691	8.48397	5.75696	5.0034	2.39936	7.36075	6.15546
EVM0027041	3	cytokinin riboside 5&apos;-monophosphate phosphoribohydrolase LOG1-like	12.4011	17.5695	96.3734	20.4971	28.2693	29.5909	20.4284	12.4916	0.774079	9.76459	5.01311
EVM0022801	3	uncharacterized protein LOC111316052 [Durio zibethinus]	18.4607	5.29169	29.6534	5.22248	11.7607	10.6427	3.58709	2.69068	13.887	8.16328	0.388685
EVM0010132	3	PREDICTED: probable (S)-N-methylcoclaurine 3&apos;-hydroxylase isozyme 2	15.1793	6.79782	55.5094	11.1982	5.14696	1.59229	1.10491	1.69408	20.3497	2.3053	3.90352
EVM0005921	3	PREDICTED: protein LURP-one-related 5 [Ricinus communis]	4.13415	44.2304	84.7438	23.3213	34.7988	18.6672	40.2866	35.677	6.62989	16.2638	15.1029
Liquidambar_formosana_newGene_11531	3	Function unknown	0	0.358782	2.72197	1.298	0.767458	0.458458	0	1.05505	0	0	0
Liquidambar_formosana_newGene_11538	3	Function unknown	0.365305	0.470457	3.03813	0.859868	0.810682	0.587696	1.1104	1.14866	1.26964	0.802389	0.617457
EVM0017135	3	very-long-chain 3-oxoacyl-CoA reductase-like protein At1g24470	0	2.65753	12.5024	3.51058	3.89298	3.20493	2.24116	2.29998	0.525527	0.447756	0.523739
EVM0020256	3	PREDICTED: cysteine-rich repeat secretory protein 38-like	1.31059	1.41344	4.90746	2.29441	1.51706	0.890752	0.41674	0.213933	0.0194907	0.266823	0.056911
Liquidambar_formosana_newGene_6541	3	unnamed protein product, partial	0	0.096824	3.56258	1.13447	0.0581033	0.0605123	0.201061	0.0177197	0	0.0890077	0
EVM0015744	3	PREDICTED: lon protease homolog 2, peroxisomal	39.468	34.8699	54.0284	37.1665	34.1907	36.9576	31.8743	29.3577	35.5822	28.1627	20.9886
EVM0024696	3	PREDICTED: chloroplast processing peptidase-like [Lupinus angustifolius]	14.3335	17.6468	82.963	13.4553	18.7209	24.6389	18.641	31.0819	22.864	18.8541	28.5571
EVM0020586	3	hypothetical protein TanjilG_14324 [Lupinus angustifolius]	0	0.0283157	6.23009	0.045091	1.45278	1.28877	1.20006	0.457543	0.0987867	0	0.214716
EVM0015669	3	Uncharacterized protein TCM_037493 [Theobroma cacao]	0.198195	0.65572	2.37319	0.648149	0.860224	0.303825	0.562146	0.744947	0.080701	0.178359	0.0741827
EVM0018633	3	Phytosulfokin receptor 1, putative [Theobroma cacao]	1.19909	1.74477	6.84451	1.73379	0.367722	0.345557	0.635959	0.677409	0.894233	1.8727	1.3239
EVM0019580	3	hypothetical protein GLYMA_19G210400 [Glycine max]	8.22695	11.0946	16.7641	9.52974	6.82035	11.0157	7.83011	6.2519	4.97728	7.48604	7.27637
EVM0023735	3	PREDICTED: P-loop NTPase domain-containing protein LPA1 homolog 2	17.5175	40.1087	114.798	39.3732	37.3108	32.7487	34.5137	42.5479	2.45655	22.0581	12.2985
Liquidambar_formosana_newGene_6335	3	Function unknown	97.4478	151.586	346.369	167.055	106.687	83.8953	102.282	90.0491	91.2394	156.45	44.6749
Liquidambar_formosana_newGene_14146	3	PREDICTED: reticulon-like protein B13	0.0186127	0.0377177	10.7735	0.197881	1.16564	0.636999	0.445525	0.777201	1.45511	0.535498	1.33653
EVM0021809	3	pentatricopeptide repeat-containing protein At1g08070, chloroplastic-like	5.53645	6.13098	10.9085	5.94827	3.63809	4.99196	4.04687	3.93666	5.3979	5.6066	5.0539
EVM0016373	3	hypothetical protein COLO4_13599	0.088097	0.590414	3.12174	0.542447	0.160908	0.242076	0.063625	0.195977	0.242408	0.14136	0.127782
EVM0013944	3	metalloendoproteinase 2-MMP-like	3.5824	1.25638	9.80366	0.817441	0.940839	0.264496	0.14207	0.0609557	0.154551	0.861051	0
EVM0018390	3	PREDICTED: probable pre-mRNA-splicing factor ATP-dependent RNA helicase DEAH4 isoform X1	7.36933	7.75558	15.4718	8.96403	5.06408	7.13511	4.31199	4.74671	3.4689	5.31197	5.57457
EVM0023580	3	PREDICTED: cellulose synthase-like protein G2	4.20267	48.2646	114.063	26.4753	23.5354	38.15	11.774	7.46583	6.00392	2.87312	0.142599
Liquidambar_formosana_newGene_7639	3	Function unknown	11.0698	19.8928	30.4149	16.0065	15.6088	13.2647	14.2826	13.5166	8.07401	14.5428	19.0315
EVM0009025	3	PREDICTED: mitogen-activated protein kinase kinase kinase YODA-like [Nicotiana tomentosiformis]	0.212493	0.294366	1.80996	0.214326	0.575775	0.383781	0.51742	0.108528	0.0835743	0.090863	0.140353
EVM0007523	3	BRASSINOSTEROID INSENSITIVE 1-associated receptor kinase 1-like	1.5157	7.06798	23.902	5.74774	0.898546	0.805021	0.361334	0.698231	0.27159	0.136515	0.0557143
EVM0010928	3	PREDICTED: probable LRR receptor-like serine/threonine-protein kinase At4g08850 [Gossypium raimondii]	0.391519	0.667576	3.20076	0.511926	0.833746	1.4314	0.595907	0.59303	0.185773	1.33993	0.169735
EVM0023346	3	PREDICTED: putative cell division cycle ATPase [Fragaria vesca subsp. vesca]	0.339777	0.582708	4.27317	0.867015	1.06075	0.752232	1.10794	0.87219	0.529161	0.401261	1.43283
EVM0018216	3	omega-3 fatty acid desaturase [Paeonia lactiflora]	10.1195	21.7223	55.3486	28.9104	14.0172	28.9476	13.1438	11.478	1.46134	3.17862	2.9937
EVM0024155	3	phytosulfokine receptor 1-like [Manihot esculenta]	1.38243	0.934165	3.53582	1.15309	0.971141	0.7205	0.519382	0.40725	0.443077	0.331751	0.529312
Liquidambar_formosana_newGene_6755	3	uncharacterized protein LOC110760581	0.242263	0.312154	1.34443	0.400389	0.352753	0.279818	0.0993567	0.235444	0.123185	0.149034	0.125697
EVM0003880	3	PREDICTED: uncharacterized protein LOC102621663	0.016215	0.0417243	1.57471	0.014854	0.110071	0.130536	0.158429	0.102853	0.0304313	0.112418	0.089424
Liquidambar_formosana_newGene_893	3	Function unknown	0.252869	0.914657	2.91188	0.76425	1.1051	0.583929	0.222474	0.232421	0.033256	0.169951	0.0438723
EVM0026370	3	F-box family protein with a domain of Uncharacterized protein function, putative [Theobroma cacao]	2.64585	6.67462	34.071	6.36505	8.43604	7.46727	0.866282	4.76181	2.99446	0.417554	0.662244
EVM0024421	3	PREDICTED: chloroplast processing peptidase-like [Lupinus angustifolius]	6.16205	11.2584	29.8381	5.35609	9.36679	12.9359	8.20262	8.7945	4.75057	3.39357	6.85919
EVM0008340	3	uncharacterized protein LOC112024739	4.11547	6.08955	12.4877	6.5883	4.79319	5.07912	4.27514	3.44157	1.18835	3.93499	4.31393
EVM0008669	3	scarecrow-like protein 14	43.1715	68.9011	175.748	73.3791	70.6642	71.2899	70.098	68.053	31.6993	40.6659	56.5442
EVM0019915	3	hypothetical protein CICLE_v10026600mg	4.38174	14.4792	43.8795	16.3842	18.8942	16.9091	18.4976	21.6762	3.11978	4.60597	6.87162
EVM0019913	3	PREDICTED: sigma factor binding protein 1, chloroplastic [Ricinus communis]	1.08337	1.42927	6.37024	1.98757	2.07471	2.68843	0.701083	0.430371	0.337492	1.24864	0.223894
EVM0007221	3	PREDICTED: F-box/kelch-repeat protein At3g23880-like [Nicotiana tabacum]	5.74842	15.4898	98.1662	16.1701	20.1771	21.4093	14.5309	10.538	5.49333	6.05292	3.04035
EVM0028822	3	pentatricopeptide repeat-containing protein At2g30780-like	7.78483	7.53823	14.1516	6.01611	6.79683	8.42114	6.55492	5.61309	1.77774	6.29137	3.78777
EVM0002893	3	PREDICTED: F-box protein PP2-B10-like [Nicotiana tabacum]	2.60383	11.2241	25.1133	8.3656	8.53293	7.27595	10.4888	8.12919	0.797916	3.23826	0.742688
EVM0025869	3	PREDICTED: cysteine-rich receptor-like protein kinase 19 isoform X3	1.24618	0.669885	3.40775	1.26947	0.673362	0.486424	0.324283	0.169404	0.308986	0.0123303	0.087802
EVM0005375	3	PREDICTED: glutamate receptor 2.7-like [Daucus carota subsp. sativus]	18.7895	20.9266	84.38	22.0856	20.1788	13.1963	7.62937	9.38937	38.1454	8.18401	6.13429
EVM0002983	3	PREDICTED: ABC transporter G family member 23	2.23784	3.99961	12.2022	5.78521	2.14381	1.02578	0.423752	0.297602	0	2.24659	0.457985
Liquidambar_formosana_newGene_13809	3	LEAF RUST 10 DISEASE-RESISTANCE LOCUS RECEPTOR-LIKE PROTEIN KINASE-like 2.4	0.0394703	0.880514	3.23656	0.471224	0.224904	0.195045	0.414068	0.477062	0.189307	0.209063	0.715626
EVM0009504	3	PREDICTED: NAC domain-containing protein 90	1.55019	11.9728	124.31	6.32317	5.36913	2.6329	8.4442	8.71501	7.93017	17.0803	22.0174
EVM0003765	3	probable WRKY transcription factor 72 [Herrania umbratica]	7.26722	3.53216	24.6	8.55396	7.1425	2.28331	1.19222	1.49841	0.143501	7.23151	0.142242
EVM0025383	3	putative calcium-transporting ATPase 13, plasma membrane-type [Prunus persica]	0.18006	0.206766	7.7844	0.211887	0.304236	0.380131	0.899498	0.953802	0.780875	1.75962	1.52601
EVM0024501	3	hypothetical protein CUMW_005950 [Citrus unshiu]	2.03799	9.72466	30.5769	10.9446	5.13557	2.76787	1.13863	0.539061	0	2.25492	0.373522
EVM0003400	3	PREDICTED: cytochrome P450 CYP72A219-like [Gossypium hirsutum]	2.49882	4.4871	11.046	4.34586	3.569	1.85218	1.85884	0.835697	0.046736	3.69406	0.260227
EVM0022901	3	hypothetical protein VITISV_029254	4.32987	3.57646	12.6343	3.66382	3.03974	2.60623	1.62368	2.56445	2.15778	4.4544	2.17651
EVM0009209	3	hypothetical protein VITISV_032887	2.99603	3.15863	9.80218	2.42449	3.28772	4.41701	3.77402	3.98702	1.39762	3.56698	1.58964
EVM0004995	3	PREDICTED: putative calcium-transporting ATPase 13, plasma membrane-type	0.311276	0.639703	2.68236	0.71841	0.708276	1.37674	1.02199	0.170857	0	0.013235	0.029911
EVM0011662	3	PREDICTED: uncharacterized protein LOC100500487	18.9325	20.4822	73.8026	11.022	5.88335	5.19196	12.8945	16.2948	1.53678	2.13316	1.52527
Liquidambar_formosana_newGene_14691	3	uncharacterized protein LOC109950837 [Prunus persica]	1.96134	8.00334	25.6484	9.05552	10.994	13.1832	5.14227	4.82883	9.34298	1.54081	5.59916
EVM0009958	3	PREDICTED: ABC transporter A family member 7	0.950009	1.64849	4.26654	2.20554	1.51761	1.40973	1.071	1.95883	0.682986	0.741204	0.595285
Liquidambar_formosana_newGene_12848	3	F-box protein At5g03100-like [Jatropha curcas]	1.1096	1.25853	2.47041	1.06495	0.955308	1.18298	1.04349	1.17961	0.326496	0.884589	1.04335
EVM0017209	3	hypothetical protein MIMGU_mgv1a020792mg, partial [Erythranthe guttata]	8.1539	6.2195	30.1291	9.3057	6.31165	6.03921	5.32064	3.96169	3.70217	6.43301	5.00553
EVM0000418	3	Function unknown	8.95074	28.9382	63.5067	4.61736	12.5886	9.30052	7.05073	6.26916	0.660237	23.9422	16.9568
EVM0018662	3	phosphate transporter PHO1 homolog 3-like isoform X1	0.00719467	0.0157563	3.25167	0.00758367	0.55861	0.424624	0.0162927	0.00257933	0.85486	0.139582	0.163229
EVM0001126	3	Cf-2.3 [Solanum pimpinellifolium]	0.104472	1.74079	6.47082	0.903274	0.707412	0.442356	0.164057	0.266011	0.0345397	0.674596	0.764855
EVM0001127	3	uncharacterized protein LOC110670161	15.5553	21.5665	38.888	24.7851	19.5975	19.3404	17.2677	17.8468	14.6784	21.2679	15.1481
EVM0000388	3	PREDICTED: GDSL esterase/lipase At4g01130	15.2772	29.9494	86.0739	7.51671	5.08897	4.10356	3.32126	2.77286	1.50109	2.09072	3.65917
EVM0016840	3	shikimate kinase, chloroplastic-like	34.1063	35.3232	144.318	49.3527	53.3418	48.9361	35.5026	27.4079	16.48	47.1849	40.7286
EVM0025688	3	PREDICTED: probably inactive leucine-rich repeat receptor-like protein kinase At5g48380	0.309511	10.9541	84.2187	7.00919	4.59974	5.73731	2.1953	2.27823	12.3726	14.979	18.0567
EVM0002755	3	PREDICTED: BAHD acyltransferase At5g47980-like	0.062365	0.324834	6.31529	0.0197173	0.677415	0.301013	1.02201	0.231241	0.251365	1.77954	0.261257
Liquidambar_formosana_newGene_10233	3	PREDICTED: TMV resistance protein N-like isoform X2	0.196442	0.690057	6.60645	0.191498	0.973116	0.215679	0.191554	0.180066	0	0.0913573	0.128849
EVM0021548	3	F-box/kelch protein	0.693056	1.58189	2.47401	0.216613	0.591519	0.402622	0.337235	0.299158	0.641638	0.199504	0.355617
EVM0017167	3	PREDICTED: RING-H2 finger protein ATL33	18.1775	33.6657	84.7006	20.1738	35.7207	24.7389	54.1749	28.2503	8.53409	39.8013	28.3332
EVM0022772	3	PREDICTED: F-box/kelch-repeat protein At3g23880-like	1.17657	2.97297	5.63733	3.09668	2.29081	1.87883	1.89434	1.68599	0.800674	2.92311	1.94323
EVM0023554	3	Function unknown	61.8767	187.273	819.524	358.446	205.607	149.649	109.541	77.4675	144.25	201.352	90.7824
Liquidambar_formosana_newGene_3363	3	PREDICTED: 2-alkenal reductase (NADP(+)-dependent)-like isoform X1	0.437558	0.603955	5.12539	0.735916	0.431055	0.465885	0.483319	1.37936	1.94005	0.543052	0.452607
Liquidambar_formosana_newGene_1885	3	Function unknown	4.67208	5.07603	12.5202	6.68829	3.34084	4.104	4.98026	5.83017	3.10981	5.25492	2.66022
EVM0026281	3	hypothetical protein CRG98_046118 [Punica granatum]	0.217381	5.00477	12.3013	7.37893	4.31535	3.83107	0.941054	3.68205	0.520366	1.79128	0.386882
EVM0014182	3	hypothetical protein CISIN_1g011961mg	16.0186	18.2679	126.828	19.0539	13.5124	22.0958	12.7404	23.7782	28.6692	13.5612	5.24035
EVM0024627	3	PREDICTED: NF-X1-type zinc finger protein NFXL1	19.9403	28.6589	114.478	29.581	37.2491	32.9965	23.3617	23.2784	17.905	12.9557	10.5593
EVM0010979	3	PREDICTED: pentatricopeptide repeat-containing protein At5g56310-like	0.740901	0.48476	1.66403	0.642226	0.70957	0.742092	0.55738	0.499128	0.420718	0.71679	0.813838
EVM0012724	3	PREDICTED: protein tesmin/TSO1-like CXC 5	3.26136	2.00367	5.92044	2.40929	2.69191	2.42145	1.8932	2.22635	0.352954	0.973765	1.43095
Liquidambar_formosana_newGene_11428	3	Function unknown	0.186418	0.230808	0.594755	0.221709	0.163252	0.040633	0.0443057	0.102248	0.054302	0.010739	0.056883
EVM0022114	3	NAC domain-containing protein 71	0.354219	1.27384	3.42304	1.09896	0.518909	0.508893	0.650079	0.525962	0.332357	0.875918	0.633642
EVM0012616	3	PREDICTED: glycerol-3-phosphate dehydrogenase [NAD(+)]-like	1.13327	3.52934	7.41209	2.71304	1.94811	1.58202	2.48063	3.19441	0.816717	1.14128	0.558125
EVM0007915	3	PREDICTED: NF-X1-type zinc finger protein NFXL2 isoform X1	12.7882	14.8408	29.3339	16.2419	16.6897	13.1778	14.1552	14.8885	11.8495	14.2096	16.1817
EVM0006797	3	respiratory burst oxidase homolog protein D-like	10.0867	48.3576	133.035	36.9309	67.8198	56.1056	39.5586	27.6573	29.0651	33.3658	63.0291
EVM0025749	3	PREDICTED: NAC domain-containing protein 90	0.314042	4.67514	37.3657	1.43552	0.879712	0.601985	1.5952	1.36023	1.88227	3.81976	3.10712
EVM0021058	3	PREDICTED: putative cysteine-rich receptor-like protein kinase 35 isoform X2	2.17568	2.13929	7.09083	2.62866	3.35153	3.03142	3.49972	3.62352	1.20539	2.8828	0.770664
EVM0014927	3	Function unknown	0	0.938392	2.15124	0.190103	1.32779	0.749363	1.32122	0.732846	0	0	0
EVM0008591	3	PREDICTED: uncharacterized protein LOC109232151 [Nicotiana attenuata]	9.61336	11.2284	38.9257	13.4119	7.16725	8.04442	6.88756	5.1983	8.09756	8.87096	5.82059
Liquidambar_formosana_newGene_4221	3	unnamed protein product, partial	0.07006	0.177605	0.656291	0.395313	0.205154	0.196287	0.115873	0.242914	0.00776733	0.120711	0.108542
EVM0026175	3	PREDICTED: exocyst complex component EXO70B1	29.5414	38.5584	72.3639	39.8942	25.8062	22.7933	22.3666	17.2167	29.8508	27.8562	22.0586
EVM0003056	3	lysM domain receptor-like kinase 3	0.123032	0.855714	1.82622	0.418917	0.183401	0.20121	0.313267	0.784708	0.30984	0.283138	0.650876
EVM0004705	3	PREDICTED: squalene monooxygenase	0.225853	1.15016	3.53552	0.331599	0.918421	0.398719	0.691925	0.39652	0.0382707	1.40213	0.554965
EVM0013015	3	PREDICTED: endochitinase EP3-like	162.926	122.922	334.174	81.6001	118.051	119.676	88.302	53.2472	54.74	82.8777	49.9888
EVM0005539	3	SKP1-like protein 1B	35.9644	40.9739	79.6265	36.7911	43.908	43.2771	37.9149	31.5131	19.6597	32.7478	29.4802
EVM0010755	3	PREDICTED: uncharacterized protein LOC100262872	28.0667	29.6044	91.7466	46.7823	38.8709	41.3787	26.807	20.5888	21.6441	26.9239	39.8062
EVM0000532	3	60S ribosomal protein L19-3 [Zea mays]	0.789961	2.99431	31.1771	2.7838	9.57884	7.56733	4.90863	9.38985	6.0131	0.548848	4.90711
EVM0026569	3	PREDICTED: cysteine-rich receptor-like protein kinase 15 isoform X1	5.64513	1.77024	13.7045	0.579955	6.10926	4.47752	3.66732	4.11695	3.92355	2.74498	0.542227
EVM0012482	3	kiwellin [Actinidia arguta]	0.416699	0.00418433	3.77498	0	0.370796	0.753862	0.155728	0.147147	0.246428	0.689905	0.113461
EVM0005770	3	PREDICTED: putative calcium-transporting ATPase 13, plasma membrane-type	0	0.21461	2.96401	0.134438	0.093458	0.0684583	0.0734567	0.0488477	0.00647167	0.0231707	0.031424
Liquidambar_formosana_newGene_11242	3	Function unknown	4.50657	7.77709	14.8774	9.71197	6.73172	8.09503	7.54035	7.19946	1.64046	5.44891	6.63811
EVM0027071	3	PREDICTED: wound-induced protein 1 [Prunus mume]	1.60297	1.59049	7.07531	1.14932	2.44892	2.89734	0.58773	0.135357	0.108417	0.0578093	0
EVM0009279	3	Allergen V5/Tpx-1-related protein	316.47	132.329	863.309	53.7029	2.91092	2.19381	1.09972	1.39277	0.0160513	5.20739	0.0287757
EVM0004787	3	cytochrome P450 81D11-like	3.26389	4.80631	97.5115	15.7967	0.44717	0.32267	0.100996	0.124876	0.335625	6.62524	1.69066
EVM0007254	3	PREDICTED: ubiquitin-activating enzyme E1 2 isoform X1	64.3045	72.3938	98.5212	65.2924	76.5177	77.1616	74.919	66.426	67.6039	71.8604	72.616
EVM0027528	3	FAD_binding_4 domain-containing protein/BBE domain-containing protein	0.15367	0.449981	1.70389	0.720061	0.618349	0.423846	0.807533	0.700195	0.553912	0.230418	0.27544
EVM0028404	3	PREDICTED: methylthioribose kinase	17.0165	28.6807	37.0946	14.3445	14.8053	17.6847	15.6101	25.1221	15.2081	14.9962	17.7974
EVM0026635	3	PREDICTED: F-box protein At3g07870-like [Ipomoea nil]	2.06007	1.46809	4.0492	2.28585	1.68486	1.53689	2.443	1.99238	0.669407	1.43731	0.821132
EVM0008771	3	PREDICTED: uncharacterized protein LOC105138874	0	0.603034	15.6883	2.65107	1.24131	0.349996	0.0615793	0.33342	0.323203	1.46501	1.41604
EVM0025172	3	F-box domain-containing protein	2.14002	1.76337	5.15928	2.03822	2.36225	2.69649	1.60097	1.39798	0.315767	1.65223	0.922554
EVM0016876	3	PREDICTED: uncharacterized protein LOC109335631 [Lupinus angustifolius]	23.2782	38.3789	69.457	33.7529	28.1858	24.3038	18.1193	22.5326	32.5484	12.0878	30.3702
EVM0005119	3	Oxoglutarate/iron-dependent dioxygenase [Corchorus capsularis]	0.0602757	0.82248	4.47113	1.52491	0.35316	0.2667	0.025075	0.099947	0	0.635765	0.089756
EVM0014565	3	heavy metal-associated isoprenylated plant protein 47-like	1.0155	3.76391	12.0692	4.5297	0.649633	0.420055	0.652038	1.28882	0.135574	0.0740447	0
EVM0024074	3	unnamed protein product, partial	1.10702	0.665326	3.59845	0.316192	0.483758	0.603992	0.24432	0.231529	0.677534	0.580487	0.416221
EVM0001701	3	PREDICTED: UDP-glycosyltransferase 87A1	7.54135	24.7301	73.1077	23.1805	1.93388	1.12093	0.387643	0.244893	0	1.63839	0.110869
EVM0008502	3	MDIS1-interacting receptor like kinase 2-like	0.139724	0.306354	0.704314	0.303921	0.0712383	0.122593	0.101836	0.333915	0.134016	0.123754	0.076582
EVM0007704	3	PREDICTED: probable galacturonosyltransferase-like 1	10.4628	20.4645	57.7893	24.7817	22.4885	9.40809	8.9671	8.30146	0.659607	4.83022	9.74979
EVM0016448	3	hypothetical protein CRG98_022464 [Punica granatum]	0.684117	1.07795	4.24241	0.829454	0	0	0.0353767	0.0687223	0.0470477	0.302975	0.495945
EVM0000916	3	PREDICTED: UMP-CMP kinase isoform X1	10.0747	13.2821	26.4049	8.8244	11.3856	8.66727	11.0697	10.9947	4.31168	11.7855	7.71539
EVM0029423	3	PREDICTED: receptor-like protein 12	0.145856	1.5919	3.96066	0.815301	0.0369913	0.0141507	0.0460753	0.0877473	0.118757	0.0751753	0.101247
EVM0018619	3	hypothetical protein CCACVL1_24163 [Corchorus capsularis]	1.56925	1.30747	5.22375	0.916127	0.902363	0.624039	0.30731	0.321325	0.134258	0.248677	0.30212
EVM0010422	3	PREDICTED: receptor-like protein kinase HSL1 [Ricinus communis]	22.3552	24.5073	123.466	47.7579	34.3536	29.197	24.1463	29.4289	46.7011	53.9479	37.1192
EVM0020830	3	transcription factor MYB13-like	0.714274	0.273536	15.8403	5.52251	0.550407	0.419023	0.396295	0.100848	0.732237	2.54914	1.74602
EVM0012926	3	PREDICTED: uncharacterized protein LOC100257506	13.2929	24.2396	80.6249	30.3658	26.8726	20.8736	23.7759	15.3518	8.28353	11.0441	6.84636
EVM0008122	3	PREDICTED: laccase-13 [Ricinus communis]	9.48115	6.82554	34.9266	6.07694	2.80674	3.10067	2.18785	2.68144	0.647442	9.79254	3.75721
EVM0016354	3	receptor-like protein 12 [Durio zibethinus]	0.094243	0.212559	0.503226	0.243331	0.112262	0.18015	0.128455	0.109741	0.00557233	0.0241097	0.144846
EVM0007093	3	PREDICTED: NAC domain-containing protein 90	0.40445	8.14791	78.3591	4.5852	3.74224	5.1317	5.67887	8.10803	4.0999	8.73581	8.95999
EVM0007097	3	PREDICTED: uncharacterized protein LOC100253584	0.419958	1.27005	10.6885	0.82474	1.08373	0.444842	1.06139	0.383034	0.104403	1.7703	1.20972
EVM0017404	3	hypothetical protein COLO4_26141	0.771486	3.27226	29.4943	3.19448	3.97798	2.46064	1.01018	0.772146	0.220566	0.365956	0.276808
EVM0013969	3	PREDICTED: uncharacterized protein LOC100266687 isoform X5	14.2416	13.2731	40.6056	10.9541	7.40408	4.52427	9.97792	5.40841	0.0989223	17.1114	0.55759
EVM0005649	3	PREDICTED: uncharacterized protein LOC109002109	11.3966	20.8822	44.046	13.4091	15.4196	12.4678	11.1219	11.4828	2.22004	3.41342	2.47078
EVM0026126	3	Derlin [Parasponia andersonii]	0.253614	2.0685	9.13783	2.80362	3.29609	1.04972	0.307703	0.738925	0.089803	0.28168	0.0606323
EVM0027311	3	PREDICTED: UDP-glycosyltransferase 87A1	2.29831	2.96291	15.2925	1.54804	2.26277	7.01282	3.53013	6.18806	1.84717	4.64533	0.569953
EVM0010596	3	PREDICTED: E3 ubiquitin-protein ligase RDUF1-like	16.9028	22.0898	56.1181	23.6044	26.8147	23.2902	29.567	29.1338	20.5119	33.5476	23.8518
EVM0012577	3	serpin-ZX	0.0999273	0.315668	1.18836	0.356065	0.678222	0.261842	0.113585	0.153467	0.387244	0.57126	0.23001
EVM0001925	3	PREDICTED: pentatricopeptide repeat-containing protein At5g66520	4.64484	6.23371	11.6765	5.99875	6.04422	7.06555	6.27335	5.90292	5.60631	5.06146	4.20353
EVM0011665	3	hypothetical protein POPTR_007G044000v3	4.0352	3.969	39.0441	6.98884	7.00104	6.9671	3.96995	3.51469	0.136299	5.2653	1.71266
EVM0013074	3	PREDICTED: putative pentatricopeptide repeat-containing protein At3g18840	0.547107	0.555926	1.09568	0.583443	0.392917	0.650161	0.260519	0.321063	0.250097	0.41553	0.433638
EVM0020358	3	Serine/threonine kinases,protein kinases,ATP binding,sugar binding,kinases,carbohydrate binding, putative [Theobroma cacao]	0.494439	0.0678333	0.913829	0.0910013	0.064507	0.385212	0.094401	0.150174	0.192567	0.284941	0.227197
EVM0007011	3	PREDICTED: putative calcium-transporting ATPase 13, plasma membrane-type	0.182495	3.6812	42.6772	1.40508	7.81598	8.53513	6.50332	7.61664	0.557497	0.497239	0.232845
EVM0014977	3	PREDICTED: uncharacterized protein LOC105786099 [Gossypium raimondii]	7.93677	11.2084	92.2084	39.0237	33.431	21.4571	8.68673	8.74072	19.2914	24.1405	25.0329
EVM0025615	3	probable disease resistance protein At5g66900	0.208578	0.312953	3.66165	0.30443	0.879538	0.619051	0.0326097	0.119881	0.0108867	0.0835453	0.0494457
EVM0017654	3	Skp1 domain-containing protein/Skp1_POZ domain-containing protein, partial	26.1893	28.0188	62.2873	24.3023	34.7589	33.4044	34.0778	30.3168	16.7826	28.8009	23.7845
EVM0015467	3	Mitochondrial carrier protein [Macleaya cordata]	10.0715	10.7756	24.7893	11.1436	10.4619	13.9607	9.30629	9.53242	4.29846	8.54627	5.01856
EVM0028155	3	PREDICTED: pentatricopeptide repeat-containing protein At4g19440, chloroplastic isoform X1	0.937582	0.996287	2.00743	1.19299	1.13514	1.26576	0.877194	0.949174	0.803676	0.843308	0.704394
EVM0013447	3	protein kinase and PP2C-like domain-containing protein isoform X1	3.41433	3.16759	6.46431	3.3367	3.36204	3.8223	2.76796	4.19551	3.24607	2.88195	3.36193
Liquidambar_formosana_newGene_6447	3	PREDICTED: protein kinase 2B, chloroplastic [Ricinus communis]	3.07239	2.29046	4.94251	2.65441	2.68631	2.17893	2.64394	2.22582	1.20798	1.88573	2.16359
EVM0000134	3	MLO11 protein	1.06662	1.89609	18.5451	1.51442	0.884939	0.856543	0.206254	0.297295	0.102718	0.193862	0.0429243
EVM0001304	3	hypothetical protein POPTR_0004s07470g	3.93919	11.8402	22.8655	10.7392	8.6253	11.1018	7.6668	10.4662	8.69073	5.6973	10.2076
EVM0007463	3	unnamed protein product, partial	1.8677	9.23621	15.2394	3.66768	2.95342	3.00247	5.86433	7.71054	0.873369	1.24646	0.452752
EVM0002141	3	PREDICTED: DDT domain-containing protein PTM	10.2162	12.359	24.5058	15.6536	12.4592	13.0051	10.4303	11.3044	12.7625	14.3709	8.53525
EVM0023236	3	unnamed protein product, partial	1.05424	1.58934	4.5858	1.44586	1.23529	1.7394	1.17944	1.92082	1.14782	1.07116	0.578256
EVM0001147	3	hypothetical protein POPTR_0182s00200g	1.12097	3.4988	11.5512	4.06015	1.52287	0.867731	1.71898	1.36071	0.186125	3.10827	0.784521
EVM0001491	3	Function unknown	0.437365	0.80435	2.29976	0.676633	0.804295	0.613203	0.39093	0.694114	0.539083	0.561171	0.20195
EVM0000367	3	hypothetical protein CFOL_v3_09683	5.34846	7.71144	11.9074	7.48224	5.66071	5.77697	4.40176	4.6706	4.54396	6.16572	4.22808
EVM0002433	3	PREDICTED: UDP-glycosyltransferase 87A1	6.74571	13.2734	54.65	14.1089	14.8755	9.98444	3.96104	1.51781	3.43655	17.4866	0.949747
Liquidambar_formosana_newGene_13224	3	Function unknown	0.143145	0.207968	0.525107	0.33268	0.274519	0.215187	0.230503	0.146534	0.054293	0.1279	0.0802947
EVM0005913	3	receptor-like protein kinase [Vitis amurensis]	0.33191	0.336943	2.75226	0.53712	0.268691	0.282684	0.068555	0.0922293	0.142576	0.622052	0.235852
EVM0014408	3	G_glu_transpept domain-containing protein, partial	18.0084	34.4461	119.212	40.3456	52.9559	46.5878	20.0193	19.1904	67.9357	5.48232	13.2624
EVM0023523	3	--	0	0.347352	3.00646	0.288725	0.696553	0.940922	0.307803	0.409116	0.0757777	0.0583757	0.116908
EVM0004229	3	uncharacterized protein LOC110656602	23.6832	16.5512	63.8008	35.9736	15.6725	13.3366	12.1207	13.8063	20.338	10.3655	15.5389
EVM0005598	3	PREDICTED: histone H1	166.351	177.116	697.505	155.762	245.625	224.575	245.267	252.005	111.019	98.0722	83.772
EVM0019412	3	hypothetical protein BVC80_8971g57 [Macleaya cordata]	4.28482	4.76419	14.8635	7.00614	5.17392	1.88249	2.46683	1.23254	1.99214	5.47024	4.12494
EVM0020596	3	protein VAC14 homolog	3.87511	4.72206	17.7284	6.08384	3.87231	4.05966	1.58074	1.94303	2.42318	3.56933	1.73165
EVM0009974	3	PREDICTED: probable LRR receptor-like serine/threonine-protein kinase At3g47570	0.639523	26.7914	86.3823	16.1014	2.10845	1.62544	1.16439	1.36077	0.067657	0.388825	0.174645
EVM0000477	3	hypothetical protein VITISV_032887	4.30624	4.66717	12.423	3.28964	4.18518	6.16853	5.18535	5.23395	2.34414	3.64373	1.74027
EVM0006739	3	PREDICTED: transcription factor MYB39 [Theobroma cacao]	6.828	7.74949	18.2021	6.19681	2.86098	1.25712	0.809983	0.332567	0	1.54174	0.087688
EVM0023149	3	probable calcium-binding protein CML47	1.96142	4.55081	14.4956	3.25961	1.29439	1.74629	0.755017	5.14738	0.629787	0.567284	0.571733
EVM0017795	3	Function unknown	3.72023	7.09956	11.3204	3.17328	2.28677	3.49583	1.09797	0.717911	0.0636857	5.17101	3.34634
EVM0023726	3	transcription factor MYB63-like	3.00559	5.32248	38.3269	15.2952	11.0803	12.0915	7.13263	4.3315	0.182619	15.9423	0.198834
EVM0005162	3	1-aminocyclopropane-1-carboxylate synthase 1	4.72009	1.55644	35.9627	1.58021	4.84365	6.6574	3.22225	2.76843	0.036949	0.400117	0.518204
EVM0011214	3	unnamed protein product, partial	2.27652	0.998712	4.89046	2.25998	1.09395	1.17498	0.179251	0.663354	0.482945	0.129325	0.182687
Liquidambar_formosana_newGene_10259	3	TMV resistance protein N [Momordica charantia]	2.99031	4.59586	19.3606	7.95101	9.83388	5.42967	3.68734	3.1765	5.60098	3.36362	1.46416
EVM0018819	3	fimbrin-5-like isoform X1 [Durio zibethinus]	7.83764	12.7178	37.2814	16.2306	17.2605	14.8866	15.3453	13.9741	3.13942	12.5649	6.74386
EVM0012269	3	unnamed protein product [Coffea canephora]	0.0995573	0.21781	1.62387	0.293321	0.0763603	0.266184	0	0.0805963	0.235993	0.0696363	0.229775
EVM0004931	3	PREDICTED: UDP-glycosyltransferase 87A1	9.41399	8.83305	83.3512	7.65113	24.1256	22.242	8.23201	5.45561	0.0626667	4.50455	0.276131
EVM0004933	3	PREDICTED: uncharacterized protein LOC104880097 isoform X2	3.6775	8.75379	12.492	6.44066	7.2012	4.61818	4.80091	5.71338	4.66948	5.35325	6.75528
EVM0026118	3	PREDICTED: ammonium transporter 2-like	10.6723	9.41279	59.9136	10.9626	8.95752	7.85537	5.56785	2.75165	5.97475	11.7194	12.4994
EVM0012705	3	PREDICTED: putative white-brown complex homolog protein 30	0.673061	0.521816	1.78669	0.706224	0.575647	0.676169	0.394952	0.375149	0.034386	0.0906347	0.211532
Liquidambar_formosana_newGene_3995	3	hypothetical protein VITISV_020834	0.0873583	0.424936	1.55557	0.442377	0.629545	0.430564	0.570155	0.398141	0.0758073	0.15799	0.075499
Liquidambar_formosana_newGene_6741	3	Function unknown	0.188048	0.4994	2.64294	0.487272	0.679246	0.691699	1.09304	0.839956	0.173267	0.478103	0.281258
EVM0003330	3	receptor-like protein 12 isoform X1 [Prunus persica]	0.481977	0.392873	2.58883	1.382	0.236616	0.180815	0.249388	0.437066	0	0.335001	0.10781
EVM0021480	3	PREDICTED: galactinol--sucrose galactosyltransferase	11.5455	36.1833	579.502	15.3922	76.7409	41.253	41.4535	28.5732	34.7909	108.164	89.9255
Liquidambar_formosana_newGene_4134	3	Function unknown	0.807795	0.635737	1.96613	0.631311	0.447473	0.793066	0.577305	0.630706	0.029768	0.229465	0.376239
Liquidambar_formosana_newGene_8779	3	Function unknown	0.180592	0.686024	1.82286	0.815271	0.73844	0.620823	0.520061	0.311506	0.175692	0.216462	0.29556
EVM0013762	3	PREDICTED: uncharacterized protein LOC108987658 isoform X3	6.59325	5.0302	14.5528	6.19548	5.60962	5.53485	8.1644	8.83504	5.19523	7.20438	5.19099
EVM0011729	3	PREDICTED: F-box protein SKIP23-like	0.0914373	0.448188	13.0715	0.890752	3.21441	4.51184	1.15825	0.726749	0.154615	4.80949	0.0473637
EVM0015352	3	AAA-ATPase At3g50940-like	3.54367	2.80821	11.1602	1.44698	4.21293	3.69464	2.53941	1.16305	0.663219	1.27167	0.627831
EVM0022810	3	hypothetical protein POPTR_018G138500v3	3.48699	10.6882	37.8441	17.0871	7.23211	4.4419	6.95477	3.57985	0.0722483	3.92859	0.032999
EVM0011387	3	PREDICTED: probable L-type lectin-domain containing receptor kinase S.5 isoform X1 [Nicotiana tomentosiformis]	5.57312	6.72506	28.8601	7.37545	11.8396	9.34346	7.92689	6.18873	13.3037	9.64431	7.65745
EVM0002268	3	PREDICTED: probable pectinesterase/pectinesterase inhibitor 51	0.259372	0.355079	1.36711	0.552069	0.360519	0.469258	0.70417	0.718018	0.201925	0.150256	0.358197
EVM0020928	3	glutathione S-transferase U9-like [Herrania umbratica]	16.2417	56.0504	201.166	41.2365	63.763	83.2193	26.6231	28.7434	20.571	3.5756	4.14013
EVM0014903	3	F-box protein CPR1-like isoform X2	0.0715707	0.917495	2.20385	1.00676	0.611922	0.645645	0.204185	0.280475	0	0.198372	0.452138
EVM0020698	3	PREDICTED: 21 kDa protein	10.9799	11.5053	28.4627	13.9896	16.1723	3.47858	6.03655	3.455	0	1.98847	0
EVM0028343	3	PREDICTED: aluminum-activated malate transporter 2	0.299888	0.0400643	5.24569	1.74153	1.66686	0.85927	0.080125	0.940962	0.378807	0.539685	1.13586
EVM0028342	3	UDP-glycosyltransferase 87A1 isoform X2 [Prunus persica]	2.54702	3.67087	16.3902	2.63052	2.70498	5.05782	1.3431	1.2582	0.775424	1.88776	0.372409
EVM0018897	3	Trehalose-phosphatase [Trema orientalis]	10.1263	14.6868	76.5924	24.3975	28.8931	28.4295	21.5703	20.9496	26.279	15.4152	9.16584
EVM0022990	3	protein argonaute 2 isoform X1	16.9667	32.9423	115.777	26.2322	28.3275	40.7908	43.4859	52.2025	10.0879	15.5714	35.9757
EVM0000085	3	protein LOW PSII ACCUMULATION 2, chloroplastic	1.30786	1.74315	3.30563	1.48331	1.34248	1.50607	1.69483	2.25924	1.22872	1.12379	1.14935
EVM0004803	3	PREDICTED: F-box/kelch-repeat protein At3g06240 isoform X2 [Eucalyptus grandis]	1.02074	1.03769	8.64251	1.21951	1.74791	2.28514	1.41018	1.1282	0	0.987016	0.359696
EVM0002036	3	PREDICTED: GDP-mannose 3,5-epimerase 1-like	2.84122	5.00991	14.8312	4.23026	2.3773	3.60996	1.20518	1.09562	0.742917	0.778904	0.499704
EVM0019696	3	BON1-associated protein 2-like	0.542742	0.927865	3.13645	0.190999	0.55979	1.36949	0.242343	0.372521	0	0.316847	0.024887
EVM0019695	3	PREDICTED: laccase-12	19.0914	35.8414	140.806	55.7931	35.4939	24.4417	7.70817	4.05891	0.199474	37.351	21.1786
EVM0011340	3	PREDICTED: tRNA (guanine(26)-N(2))-dimethyltransferase	1.22908	1.87442	3.27894	1.41737	0.998284	1.75486	1.3113	1.49022	1.25969	0.907183	0.61371
EVM0000291	3	hypothetical protein POPTR_0002s19350g	0	1.56666	24.1037	0.416768	5.4765	1.79754	2.01132	1.49032	0.0645637	0.214204	1.38612
EVM0026383	3	PREDICTED: L-type lectin-domain containing receptor kinase IX.1 [Ricinus communis]	0.194976	1.79898	4.71445	1.7111	1.32315	0.399017	0.244033	0.106594	0.10416	0.257516	0.060893
EVM0020689	3	vacuolar invertase [Coffea canephora]	2.40274	67.2869	144.552	66.3643	23.4792	7.48226	12.3397	19.2202	20.1646	27.7493	54.8986
EVM0024756	3	PREDICTED: arogenate dehydratase/prephenate dehydratase 1, chloroplastic	22.1587	24.2213	57.6059	24.2545	18.4401	23.1252	7.14052	5.91721	0.332021	9.04307	4.21408
EVM0001191	3	hypothetical protein VITISV_032969	27.4749	18.2672	71.2081	17.0141	4.36854	4.6607	2.15224	1.01888	0.557402	5.98654	0.0506737
Liquidambar_formosana_newGene_7536	3	Function unknown	0.210112	0.338706	6.38979	1.84609	0.345372	0.61324	0.214053	0.913109	0.813424	0.510674	0.0489047
EVM0006876	3	PREDICTED: probable galacturonosyltransferase-like 1	0.019579	6.12494	23.4141	4.65752	3.06944	2.20342	0.953969	0.085948	0.0115387	0.38202	0.422461
EVM0003759	3	uncharacterized protein LOC110656602	16.2028	40.1431	173.907	61.4597	28.7948	27.368	17.0186	30.8688	20.5955	3.97175	4.24781
EVM0002407	3	uncharacterized protein LOC105156717 [Sesamum indicum]	1.57885	4.18914	13.1407	2.97696	1.57305	1.78221	2.23562	2.09933	3.05278	4.9707	4.0565
EVM0005753	3	PREDICTED: CDPK-related kinase 5-like	39.7089	41.2808	114.143	72.533	44.5341	36.5056	31.8827	34.6085	31.2681	49.7002	32.1209
EVM0010178	3	PREDICTED: uncharacterized protein LOC104878606	1.44505	1.42891	5.01601	1.6407	1.07693	0.972943	0.52394	0.520821	1.26153	2.04513	1.34232
EVM0017237	3	PREDICTED: transcription factor TCP9	11.1146	16.4577	43.9862	13.2743	13.7156	12.9824	9.83442	12.6558	7.79711	15.0325	3.91803
EVM0007867	3	PREDICTED: BTB/POZ and MATH domain-containing protein 2	42.2087	36.8314	63.6772	50.2599	42.8781	40.8223	46.7431	40.3166	44.4239	45.989	35.337
Liquidambar_formosana_newGene_3860	3	MDIS1-interacting receptor like kinase 2-like	0.514814	0.690701	1.51617	0.519375	0.0711257	0.0324087	0.0788857	0.276679	0.0546357	0.435322	0.136292
EVM0018737	3	PREDICTED: phospholipase A1-Igamma1, chloroplastic	1.00461	3.86772	9.79095	1.46019	3.084	3.33778	1.13771	0.816993	0.3532	0.811505	0.117093
EVM0011613	3	PREDICTED: uncharacterized CRM domain-containing protein At3g25440, chloroplastic	7.48192	7.5485	11.862	6.0622	6.2429	8.52163	6.41082	5.94619	2.59725	6.31119	4.87881
EVM0006274	3	glutamate receptor 2.7-like [Durio zibethinus]	0.034863	0.226849	1.11821	0.107476	0.219987	0.266351	0.071417	0.029429	0.216854	0.0203293	0.09347
EVM0010434	3	hypothetical protein CISIN_1g015535mg	0.0429537	0.517365	2.04572	0.662755	0.307004	0.13554	0.041856	0.0464297	0.0259173	0.0709373	0.022782
EVM0007984	3	PREDICTED: cysteine-rich receptor-like protein kinase 2	0.657022	0.567415	1.58961	0.734533	0.612963	0.598386	0.634182	0.638928	0.465226	0.696289	0.633429
EVM0018912	3	PREDICTED: formin-like protein 3 isoform X1	0.27094	1.28278	6.26139	2.87684	2.95934	1.58613	1.19067	1.27133	0.0695313	0.058024	0.246911
EVM0019790	3	uncharacterized protein LOC112020997	0.79339	2.19286	4.5199	0.988378	0.705169	0.203614	0.201659	0.449117	0.137517	0.284311	0.325563
EVM0026519	3	PREDICTED: cysteine-rich receptor-like protein kinase 10	2.20151	2.44805	15.4182	7.22644	1.6727	1.02541	0.261559	0.265221	0.0546483	1.23064	0.182764
EVM0015960	3	PREDICTED: trifunctional UDP-glucose 4,6-dehydratase/UDP-4-keto-6-deoxy-D-glucose 3,5-epimerase/UDP-4-keto-L-rhamnose-reductase RHM1 isoform X1	0.613981	0.649959	2.06341	0.4563	0.389032	0.396684	0.114867	0.0853503	0	0.0189817	0.106253
EVM0021355	3	SNF2-related [Macleaya cordata]	2.15335	2.30745	3.7616	1.65384	2.02613	1.45827	1.41678	1.65465	1.64044	0.795714	0.621903
EVM0020008	3	PREDICTED: uncharacterized protein LOC104882103	1.67538	1.84485	5.41208	1.66242	0.74532	1.00536	1.19121	1.05135	0.168445	1.33452	0.255329
EVM0017818	3	LRR receptor-like serine/threonine-protein kinase GSO2 [Jatropha curcas]	0.126616	0.189786	1.23313	0.39909	0.081534	0.0757843	0.134306	0.137438	0.29085	0.104131	0.003558
EVM0011223	3	PREDICTED: uncharacterized protein LOC100853829 isoform X1	0.987566	4.17101	9.51477	3.0927	2.16329	5.41126	2.8572	2.06062	0.157981	0.239071	1.50608
EVM0022709	3	glutamate receptor 1.2-like isoform X1 [Durio zibethinus]	0.00647033	0.640692	6.2165	1.38823	1.51037	1.19073	0.47968	0.429432	0.103194	1.05079	1.01145
EVM0012163	3	PREDICTED: IQ domain-containing protein IQM6 [Theobroma cacao]	2.13613	16.7402	57.7143	24.9155	11.3456	4.13017	5.30565	6.75028	1.10074	4.73685	3.73013
EVM0027634	3	Myb_DNA-binding domain-containing protein	0.93325	2.4662	12.5769	1.871	0.286862	0.444357	0.0842047	0.0965887	0.0888527	2.84857	1.93326
Liquidambar_formosana_newGene_12718	3	PREDICTED: uncharacterized protein At4g02000-like [Gossypium raimondii]	0.309826	0.256801	0.969388	0.736642	0.427756	0.473185	0.327551	0.53728	0.389206	0.191973	0.27339
Liquidambar_formosana_newGene_13120	3	hypothetical protein MTR_4g078300 [Medicago truncatula]	0.167595	0.844045	2.14635	0.770522	0.83806	0.652194	0.930965	0.95445	0	0.132535	0.601448
EVM0022827	3	hypothetical protein COLO4_14548	4.58614	4.27091	13.6182	5.47482	3.11497	4.05774	3.08376	3.12702	2.05858	5.30648	6.02179
EVM0003147	3	heavy metal-associated isoprenylated plant protein 47 [Arachis ipaensis]	12.3168	17.7364	89.2168	26.3964	21.2354	14.6567	22.7324	43.6238	18.4653	5.01401	12.1664
EVM0027958	3	PREDICTED: LRR receptor-like serine/threonine-protein kinase GSO1 isoform X1 [Nicotiana sylvestris]	3.7065	4.4177	23.4219	7.51877	4.78629	2.05172	1.67833	2.05139	5.57861	3.40517	1.97921
Liquidambar_formosana_newGene_5249	3	PREDICTED: protein trichome birefringence-like 13 isoform X1	3.06071	3.42015	10.0987	3.6138	0.564231	0.468697	0.65275	0.735474	0.053706	0.473504	0.230895
EVM0025941	3	PREDICTED: histone H1 [Vigna angularis]	107.37	87.8381	289.916	110.358	119.982	77.0752	94.1287	119.717	82.7297	75.9724	77.3975
EVM0018844	3	PREDICTED: scarecrow-like protein 14	0.553702	2.71782	31.4264	3.13524	2.77046	3.88816	0.638992	0.456134	0.963707	4.70967	7.9542
Liquidambar_formosana_newGene_8353	3	Function unknown	0.849038	4.53395	9.80369	1.68339	0.200299	0.270071	0.28847	0.36121	1.11194	0.626795	0.118641
EVM0005841	3	PREDICTED: L-type lectin-domain containing receptor kinase IX.1-like	0.428957	0.08694	0.735313	0.189617	0.351597	0.280441	0.10861	0.194345	0.0533697	0.0641873	0.048707
EVM0015404	3	uncharacterized protein LOC110753763	1.0682	1.15133	6.77082	1.93744	0.726224	1.21749	0.505918	0.620276	0.261441	1.16712	0.774155
Liquidambar_formosana_newGene_2787	3	Function unknown	1.49143	3.78642	12.9982	3.35586	0.207253	0.118507	0.995502	0.93477	0.103887	3.33578	0.0903407
Liquidambar_formosana_newGene_2788	3	Function unknown	0.77802	1.73477	3.33551	0.907953	0.04684	0.0484203	0.168853	0.0272787	0	0.197831	0
EVM0002646	3	PREDICTED: nuclear speckle splicing regulatory protein 1-like	7.13838	7.49906	13.1265	9.34207	7.57453	7.70561	7.77637	6.93773	5.85869	9.25651	5.70225
EVM0017439	3	peptidyl-tRNA hydrolase, mitochondrial-like	8.87019	11.5146	15.1914	8.40945	9.17129	11.0634	7.26424	7.29974	5.94606	8.20485	7.44926
EVM0024701	3	F-box protein At3g07870-like	1.22996	1.32487	4.39389	1.49716	1.3451	1.6841	1.0871	1.26374	0.156896	1.73065	0.968329
Liquidambar_formosana_newGene_4105	3	uncharacterized protein LOC110616860 [Manihot esculenta]	0.061268	0.73064	1.9176	0.41075	0.184267	1.04663	0.432752	0.607685	0.340406	0.216796	0.557965
EVM0001477	3	RING/U-box superfamily protein [Theobroma cacao]	7.76891	4.09611	20.1541	9.30912	4.5742	7.09227	2.41358	1.93663	0.587395	5.77268	3.1903
EVM0007030	3	hypothetical protein VITISV_021428	0.0580293	1.72468	15.0443	1.49054	4.38191	2.15789	2.92681	3.03919	0	0.411513	0.00985833
EVM0025677	3	protein PTST, chloroplastic-like	8.33653	19.4257	31.1929	17.7557	16.0645	17.6634	15.7486	17.1168	9.98949	8.12462	9.63298
EVM0021701	3	germin-like protein subfamily T member 2 [Prunus persica]	0.791515	2.02662	18.947	6.42871	6.407	4.98719	0.835005	0.371909	0.0154413	7.27694	0.356728
EVM0022947	3	PREDICTED: cysteine-rich receptor-like protein kinase 10	0.341173	0.409201	7.35274	1.06701	1.67694	0.927785	0.127263	0.588943	0	0.037989	0
Liquidambar_formosana_newGene_4749	3	DNA topoisomerase [Handroanthus impetiginosus]	3.43863	2.78133	6.49717	2.42732	4.24523	2.8467	1.37222	1.38062	1.50832	1.94417	3.01754
Liquidambar_formosana_newGene_2018	3	hypothetical protein VITISV_026680	0.404984	0.349881	0.839425	0.336562	0.168457	0.140915	0.188348	0.219461	0.116828	0.263235	0.150207
EVM0002373	3	PREDICTED: uncharacterized protein LOC109020548 isoform X2	5.96367	8.84871	26.6107	9.55681	11.4314	7.76301	8.65131	5.33279	5.11578	6.66325	3.71456
EVM0012283	3	PREDICTED: RNA polymerase II C-terminal domain phosphatase-like 3 isoform X1	3.99325	4.23424	10.7835	5.75086	5.10659	4.39567	3.90529	4.97151	4.77386	6.11479	5.56675
EVM0000159	3	5_nucleotid domain-containing protein	13.4491	14.4066	27.4568	15.1983	10.0597	11.0236	5.22043	4.85639	7.47383	9.34075	5.9135
EVM0000156	3	uncharacterized protein LOC112035254	0.530476	0.271933	3.7534	1.94821	0.177188	0.0509573	0.0141517	0.055084	0	0.782775	0.233846
EVM0026320	3	protein NIM1-INTERACTING 1-like	1.12294	3.79111	102.384	1.74562	13.7229	11.697	9.01832	4.18333	0.274255	8.08131	2.54296
EVM0027232	3	PREDICTED: cysteine-rich receptor-like protein kinase 2	6.3825	9.57573	31.2393	5.43261	5.23877	6.25103	5.57737	4.13576	1.52098	3.6876	1.69662
EVM0026543	3	PREDICTED: uncharacterized protein LOC100254469 isoform X2	9.06833	8.69889	19.1648	9.44061	8.21114	10.0089	8.8147	7.89162	3.10741	5.23856	6.4321
EVM0013830	3	PREDICTED: uncharacterized protein LOC104597338	0.0296273	3.95684	7.59287	1.47004	1.71952	2.20649	0.96627	0.219885	0.232652	1.16445	1.49262
EVM0018111	3	PREDICTED: F-box/kelch-repeat protein At3g23880-like [Nicotiana attenuata]	10.4041	4.62385	19.6828	6.14598	8.52742	11.0125	6.69987	6.78746	2.65125	6.68821	8.87729
Liquidambar_formosana_newGene_14206	3	Function unknown	0.367684	0.635483	1.83068	0.575122	0.854726	0.272291	0.743166	0.166917	0.12523	0.407193	0.184576
EVM0005106	3	unnamed protein product, partial	2.50174	5.90743	28.8794	5.66998	4.3011	2.38828	1.26705	0.551743	0	1.11779	0.0645873
EVM0004859	3	auxin-responsive protein SAUR21-like	0.0235367	5.30743	13.4843	5.75823	2.12035	1.54769	1.70546	2.87068	0.397617	0.186349	0.42326
EVM0020430	3	F-box/LRR-repeat protein At3g59190-like	0.496872	0.655209	5.08995	0.142001	0.328747	0.689109	1.09894	0.598795	0.024252	0.791251	1.12408
EVM0003449	3	uncharacterized protein LOC105646445 [Jatropha curcas]	0.224578	0.85909	12.2356	0.71815	2.41179	1.23815	0.771919	0.499633	0.0394097	0.352808	0.729525
EVM0021503	3	PREDICTED: tropinone reductase-like 1 [Theobroma cacao]	3.21186	3.25647	8.49602	2.05289	1.82955	2.27257	0.13351	0.415999	0	1.34126	0
EVM0024069	3	probable glutathione S-transferase [Herrania umbratica]	3.27962	6.37492	14.4256	3.11612	4.9288	1.6122	1.45367	1.64745	0.0199113	1.54922	0.771098
EVM0022749	3	vacuolar fusion protein MON1 homolog	32.1428	41.5257	65.6187	49.386	43.766	37.1189	39.5114	42.4976	32.7044	31.1673	22.5465
EVM0006676	3	FBD-associated F-box protein At4g10400-like	0.0565737	1.86013	3.48671	1.0309	1.42721	0.920941	0.694413	0.964688	0.012791	0.0516717	0.295095
EVM0026245	3	putative allergen Pru p 2.04 [Prunus dulcis x Prunus persica]	2.20832	2.02981	22.5719	2.7516	7.59569	7.37386	4.95538	6.21558	6.65844	5.13144	6.2158
Liquidambar_formosana_newGene_6950	3	hypothetical protein VITISV_043898	0.263749	0.859337	3.43898	1.33283	0.501447	0.141917	0.152088	0.077537	0.0186983	0.262942	0.020159
EVM0012766	3	PREDICTED: protein BONZAI 3 isoform X1	0.55342	7.20198	18.7466	9.22546	9.04995	4.33893	1.86504	1.61742	0	3.2713	0.0155
EVM0012073	3	PREDICTED: pentatricopeptide repeat-containing protein At5g50390, chloroplastic	4.71009	7.12801	11.1221	6.6214	5.42889	5.21032	5.90619	5.48107	2.81563	4.61893	4.0081
EVM0019570	3	alpha-amylase-like protein [Vitis labrusca x Vitis vinifera]	0.43134	0.553028	1.16101	0.308844	0.229553	0.14046	0.062517	0.0705083	0.047892	0.246891	0.276088
EVM0004665	3	receptor-like protein EIX1	0.416185	0.840289	5.15843	0.606266	0.073911	0.0239927	0	0	0	0.090174	0
EVM0002797	3	PREDICTED: glutamate receptor 2.9-like [Capsicum annuum]	0.250575	1.09932	4.6752	2.32566	0.578013	0.659452	0	0.902833	1.67655	0	0
EVM0016345	3	transcription factor JUNGBRUNNEN 1 isoform X1	1.54617	0.979013	9.53134	1.39134	1.07293	0.595585	0.395747	0.143958	1.29225	2.31488	0.261476
Liquidambar_formosana_newGene_7384	3	PREDICTED: putative nuclease HARBI1	1.90952	1.45032	3.91646	1.61504	1.04065	0.708986	1.00091	0.964787	0.062454	0.93425	1.23194
EVM0018538	3	PREDICTED: uncharacterized protein LOC18593216 [Theobroma cacao]	1.84191	4.66606	14.834	6.64064	5.74847	2.81207	1.2422	0.715583	0	2.78965	0
Liquidambar_formosana_newGene_14322	3	Function unknown	0.193344	0.32481	2.53903	0.592693	0.962606	0.625748	0.331497	0.305695	0.530675	1.16295	0.324032
EVM0011396	3	serine hydroxymethyltransferase 4	117.239	157.298	247.654	161.738	134.029	200.033	125.212	104.624	47.5359	150.903	121.741
EVM0009463	3	PREDICTED: uncharacterized protein LOC100240811	6.39558	7.11744	24.8595	5.53116	4.85803	6.56871	5.76763	8.0318	7.29784	4.91201	3.90718
EVM0002553	3	ribosomal lysine N-methyltransferase 3 isoform X1 [Vigna radiata var. radiata]	9.87614	7.97524	16.829	6.35077	9.04164	10.3003	10.453	9.43555	4.83012	8.47534	6.02261
EVM0016576	3	BnaC06g31680D [Brassica napus]	2.16143	4.60984	14.7321	4.28389	6.10719	6.35015	5.09666	6.21885	1.74718	2.85429	4.17983
EVM0029215	3	hypothetical protein VITISV_018095	0.38045	0.614815	2.01478	0.852307	0.587604	0.357854	0.351239	0.684304	0.660139	0.664544	0.350932
EVM0014721	3	PREDICTED: uncharacterized protein LOC100246692	4.60643	5.64147	9.02229	4.83838	6.34691	5.5524	4.40201	4.95483	3.22351	4.01706	6.06539
EVM0009149	3	hypothetical protein CCACVL1_05792 [Corchorus capsularis]	0.414463	1.3585	3.8582	0.438005	1.24428	0.688586	1.01184	0.578906	0.579433	1.02505	0.426659
Liquidambar_formosana_newGene_1118	3	AAA+ ATPase domain containing protein [Parasponia andersonii]	1.38848	2.47903	4.84358	1.69845	0.908023	0.654841	0.291304	0.401088	1.20049	0.67151	0.910798
EVM0000233	3	PREDICTED: ammonium transporter 2-like	8.32424	5.81726	27.1864	11.3728	5.63454	5.8523	4.19929	2.06992	0.287249	3.41059	3.23123
EVM0006581	3	hypothetical protein VITISV_019620	16.5435	20.2002	94.3905	13.107	20.0371	9.44986	4.46754	3.60855	1.92558	12.5759	1.30528
EVM0015373	3	PREDICTED: probable serine/threonine protein kinase IRE	2.27977	1.55413	5.40267	2.68692	1.58012	0.804747	0.574353	0.628712	1.41759	1.84136	2.19922
Liquidambar_formosana_newGene_740	3	TMV resistance protein N	2.50895	5.00282	17.1914	8.47072	8.83954	4.42643	2.08814	2.01295	0.659572	2.72484	0.159625
Liquidambar_formosana_newGene_12929	3	probable copper-transporting ATPase HMA5 isoform X2 [Jatropha curcas]	1.05951	1.59304	3.33981	1.65279	0.763164	0.770856	0.944228	0.901803	0.10882	0.77765	0.254593
EVM0001394	3	AMP-dependent synthetase and ligase family protein [Theobroma cacao]	5.50915	18.0585	54.4669	22.0346	0.754432	1.00992	0.458805	0.761083	0.515924	5.98947	0.559813
EVM0006162	3	ChaC family protein-like [Theobroma cacao]	37.5195	388.607	538.073	60.277	57.2864	80.7244	196.102	399.027	157.596	27.8069	95.9508
EVM0020554	3	probable mediator of RNA polymerase II transcription subunit 37e	4.4558	6.25579	8.44226	3.19739	4.59278	5.32847	4.52655	3.63774	1.88989	4.51781	5.21918
EVM0014723	3	PREDICTED: probable RNA polymerase II transcription factor B subunit 1-1 isoform X1	23.5351	32.0952	42.3474	22.7306	26.6113	28.7822	26.7955	25.7253	18.3287	23.9578	30.5945
EVM0018038	3	PREDICTED: MDIS1-interacting receptor like kinase 2	0.196966	0.106109	0.53827	0.127783	0.125433	0.354563	0.115537	0.394371	0.170494	0.214357	0.12887
Liquidambar_formosana_newGene_2051	3	Function unknown	0.696233	0.667883	2.87524	0.781518	1.53365	0.990354	1.01796	1.43051	0.308276	0.669667	1.4683
EVM0029230	3	PREDICTED: TATA box-binding protein-associated factor RNA polymerase I subunit B	10.481	11.9641	20.3685	12.6275	11.6458	13.7128	12.5121	12.8233	3.70561	12.0822	13.5641
EVM0015281	3	hypothetical protein JCGZ_00739 [Jatropha curcas]	2.75721	2.17065	5.47488	2.45625	3.85585	2.57552	1.79081	1.6819	0.746677	1.82977	3.62125
EVM0007832	3	PREDICTED: dehydrodolichyl diphosphate synthase 6-like [Nicotiana attenuata]	1.01142	1.06993	2.17378	0.766988	0.883848	0.93206	0.865586	0.84703	0.431801	0.950396	1.22588
EVM0025702	3	hypothetical protein L195_g024695 [Trifolium pratense]	0.240882	0.35233	3.33339	0.202487	0.507553	0.749267	1.14842	1.58387	0.298478	0.18327	0.351085
EVM0022064	3	PREDICTED: uncharacterized protein LOC100259153	4.87119	4.38425	8.65103	3.56697	3.8365	5.05388	3.47404	2.43277	0.650947	2.0722	1.47646
EVM0027875	3	PREDICTED: acid beta-fructofuranosidase-like	0.199697	0.492158	3.08064	0.427566	0.170908	0.0407913	0.040646	0.015321	0.0266693	0.0418107	0
Liquidambar_formosana_newGene_8758	3	Function unknown	0.324537	0.261051	2.07055	0.525838	0.589771	0.817212	0.959013	1.01554	0	0.00909133	0.00741733
EVM0014814	3	PREDICTED: binding partner of ACD11 1 isoform X4	15.0915	10.3825	26.3804	9.6056	9.25166	9.81835	9.31567	9.54382	3.65127	11.1526	14.7181
Liquidambar_formosana_newGene_10422	3	Function unknown	0.31002	0.519658	2.46337	0.727499	0.300411	0.274918	0.19351	0.255194	0	0.0838473	0
EVM0024402	3	PREDICTED: uncharacterized protein LOC107407556	2.39731	3.95648	8.60989	7.97024	5.62872	6.15716	4.06705	4.28294	5.64681	3.10232	5.25562
EVM0025510	3	PREDICTED: DNA repair protein RAD4 [Solanum tuberosum]	6.77085	9.14971	14.7351	9.29715	7.1215	9.23682	9.00105	9.93939	9.38903	9.17468	9.81199
EVM0008107	3	PREDICTED: RNA polymerase II C-terminal domain phosphatase-like 3 isoform X2	6.95127	7.31303	16.6227	9.11425	9.35473	8.6246	7.70016	10.458	10.1149	9.48958	10.2208
Liquidambar_formosana_newGene_8790	3	Function unknown	0.0165417	0.649837	1.75142	0.628296	0.0280677	0	0	0.0104013	0.334473	0.0221587	0
Liquidambar_formosana_newGene_5617	3	PREDICTED: UPF0481 protein At3g47200-like	0.0852813	0.209662	2.92134	1.23198	0.08492	0.0861223	0	0	0	0.261299	0
EVM0028550	3	hypothetical protein POPTR_001G436100v3	11.9456	13.324	27.1098	13.9396	13.4996	14.2638	14.3095	10.6954	8.97732	17.5686	15.4955
EVM0004482	3	UDP-glucuronate 4-epimerase 3 [Prunus persica]	19.1379	49.6218	80.2527	46.5923	33.2673	19.6426	30.7406	28.285	27.4759	24.1732	48.9501
EVM0020485	3	cysteine-rich receptor-like protein kinase 42 isoform X1	2.14333	1.71716	8.00088	4.03688	1.51564	1.42816	1.027	1.02345	0.811798	2.40516	3.55672
EVM0022430	3	hypothetical protein POPTR_003G177000v3	5.91709	3.29109	10.8702	6.11072	7.03752	5.77883	4.8756	5.92953	6.18667	4.99142	7.20224
EVM0010236	3	PREDICTED: probable sugar phosphate/phosphate translocator At3g17430	2.52236	3.4161	11.0636	2.71639	4.41723	2.45612	2.08701	1.51591	4.18251	3.22378	5.69023
EVM0026027	3	protein DEHYDRATION-INDUCED 19 homolog 4-like	42.7714	67.6585	95.4443	66.2066	62.8641	66.62	58.7615	60.0435	64.097	57.844	74.3529
EVM0018826	3	PREDICTED: cysteine-rich receptor-like protein kinase 2	3.12685	9.05336	22.7763	7.8193	9.38395	10.6381	8.57933	11.3893	5.96793	9.62109	13.0905
EVM0026359	3	G-type lectin S-receptor-like serine/threonine-protein kinase LECRK4	0.157543	0.299733	0.981937	0.189539	0.0481053	0.183703	0.165707	0.460299	0.247529	0.305006	0.383291
EVM0002480	3	PREDICTED: LEAF RUST 10 DISEASE-RESISTANCE LOCUS RECEPTOR-LIKE PROTEIN KINASE-like 2.4	0.309405	1.67673	5.80035	1.35424	2.63616	3.14653	1.71594	1.21399	1.65169	3.27096	2.91422
EVM0029387	3	Function unknown	2.91633	2.23301	7.05637	3.17613	2.55984	1.82105	2.03148	2.16668	2.63387	1.48443	4.28366
EVM0023296	3	PREDICTED: calcium-transporting ATPase 12, plasma membrane-type	0.0773663	2.12725	13.3059	2.82421	3.05835	2.47091	6.0983	6.73775	3.27573	1.21263	3.43586
EVM0018646	3	PREDICTED: putative calcium-transporting ATPase 13, plasma membrane-type	0.0128293	0.0795513	0.452765	0.0183607	0.10748	0.0578057	0.256264	0.130219	0.00614833	0.0381653	0.081071
EVM0014546	3	probable carboxylesterase 2 [Olea europaea var. sylvestris]	0.279177	0.292007	2.56631	0.79184	0.235657	0.0948957	0.057971	0	0.104608	0.382887	0
EVM0010788	3	PREDICTED: uncharacterized exonuclease domain-containing protein At3g15140 isoform X1	8.65032	10.8369	20.6786	12.9142	9.20142	7.93412	10.0113	12.7156	10.6539	11.8062	12.6114
EVM0003854	3	PREDICTED: glycerophosphodiester phosphodiesterase protein kinase domain-containing GDPDL2-like isoform X2	0.143035	0.853357	3.72622	0.429149	0.916044	0.889137	0.545966	0.293036	0.269813	0.594022	1.92455
EVM0018062	3	uncharacterized protein LOC18032645 isoform X1	26.3326	42.18	82.4492	25.5359	41.9167	45.3099	41.5166	35.7996	27.4361	49.1317	51.8582
EVM0010107	3	putative disease resistance RPP13-like protein 1 isoform X2	0.0576453	0.117993	1.10205	0.327247	0.042344	0.026921	0.005097	0.006059	0.106758	0.133076	0.444188
EVM0009255	3	PREDICTED: kinesin-like protein KIN-7E	1.47566	1.4309	4.29839	2.21655	1.21912	0.901236	0.588146	0.509127	0.30265	1.16042	0.614825
EVM0018167	3	serine/threonine-protein kinase AFC2 isoform X1 [Morus notabilis]	48.88	34.6004	81.7708	50.4932	38.1995	36.2925	42.6346	33.5448	12.2292	25.0223	23.0724
EVM0013116	3	hypothetical protein POPTR_0001s15360g	10.3717	16.4996	46.7053	20.8386	5.06371	2.29993	1.66752	0.756919	0.425566	12.5401	1.72053
EVM0004242	3	interaptin-like	1.44687	2.11836	5.3222	3.28232	1.50105	1.6831	1.18426	1.60627	0.172466	0.77204	2.4056
EVM0000037	3	PREDICTED: serine/threonine-protein kinase-like protein ACR4	2.53369	1.90245	9.32116	4.41729	0.816645	0.791104	0.402135	0.411374	0.264552	2.91711	1.18741
EVM0013100	3	PREDICTED: uncharacterized protein LOC107426438	6.67554	5.84811	14.564	9.73552	6.65026	4.99132	4.35803	4.47082	4.5739	5.72397	7.58534
EVM0017869	3	PREDICTED: COMPASS-like H3K4 histone methylase component WDR5A	28.3005	22.1852	39.7849	29.0578	22.3089	24.8536	19.548	22.41	16.8902	25.5214	24.9812
EVM0009721	3	PREDICTED: probable carboxylesterase 7 isoform X1	13.3367	15.3502	46.5839	23.4905	6.32892	5.55214	3.13461	2.69158	6.74419	12.6542	2.52138
EVM0003944	3	ABA transporter [Camptotheca acuminata]	4.17174	27.1859	85.7866	59.7358	33.4688	22.7669	18.7789	15.2097	21.2616	38.2685	27.0808
Liquidambar_formosana_newGene_11500	3	uncharacterized protein LOC112013246	3.17375	9.26279	96.5933	7.35584	12.9805	13.1746	11.0131	5.65021	6.08113	43.3074	4.98877
EVM0015520	3	Uncharacterized protein family UPF0497 [Macleaya cordata]	4.18793	1.09198	11.6255	1.97064	1.01589	1.06855	0.538785	0.845592	0.206776	4.44642	0.324147
EVM0016763	3	PREDICTED: spermidine sinapoyl-CoA acyltransferase	10.3193	13.7819	34.3226	19.7359	9.11535	11.0281	7.85023	8.89252	2.66223	9.7519	3.25273
EVM0024012	3	glycylpeptide N-tetradecanoyltransferase 1-like	22.0201	20.7365	31.3886	21.2159	21.6689	21.8138	19.7862	17.862	11.9724	24.0383	19.6242
EVM0002058	3	isoform 2 of f-box/lrr-repeat protein	3.57726	3.41422	7.92516	5.2571	3.41876	3.62677	2.98672	3.89574	0.998427	4.69585	4.79422
EVM0019210	3	PREDICTED: scarecrow-like protein 14	0.133782	0.781227	5.45136	0.772318	0.52682	0.528245	0.284111	0.248045	0.240705	1.24503	2.20383
EVM0010328	3	PREDICTED: uncharacterized protein LOC100254101	7.05746	11.6111	18.6233	11.3401	9.93408	8.40959	11.0216	11.4475	2.58748	8.96223	13.6419
Liquidambar_formosana_newGene_683	3	Function unknown	0.273957	0.63402	1.27517	0.79993	0.358389	0.48792	0.279746	0.441451	0.0483397	0.449485	0.403825
EVM0006918	3	unnamed protein product [Coffea canephora]	36.4849	84.3222	183.121	61.2715	66.0247	63.2881	39.1287	31.3451	23.9342	105.447	21.9151
EVM0019918	3	PREDICTED: protein TIME FOR COFFEE isoform X2	22.7171	30.8462	82.2151	54.6711	30.2707	27.1441	38.7294	28.9532	13.8177	29.3338	12.5331
EVM0006712	3	PREDICTED: protein indeterminate-domain 2	22.3853	24.8738	53.5237	35.8865	28.7695	25.4384	22.907	19.9551	8.24303	24.6864	14.9471
EVM0003784	3	PREDICTED: BTB/POZ domain-containing protein At5g03250 isoform X1	0.465016	0.544317	1.29028	0.798412	0.40771	0.483226	0.353723	0.340192	0.12685	0.389102	0.368604
EVM0024822	3	PREDICTED: wall-associated receptor kinase 2	3.63833	9.00263	22.6118	11.5694	6.13491	2.05096	1.41695	0.694245	0.110822	7.14057	0.156747
EVM0029228	3	hypothetical protein MANES_18G128000 [Manihot esculenta]	6.37141	5.85285	33.0141	6.57489	1.90259	1.30675	0.430646	0.328221	0.0397343	12.4112	3.9888
EVM0026057	3	G-type lectin S-receptor-like serine/threonine-protein kinase LECRK4 [Prunus persica]	4.16185	7.90223	16.4251	4.08077	1.24516	1.27511	0.324154	0.43544	0.231507	0.303698	0.358038
EVM0023104	3	PREDICTED: uncharacterized protein LOC103334862 [Prunus mume]	4.71022	3.70466	7.70594	5.52048	3.40678	3.9358	2.52893	2.37318	4.22575	3.36681	3.21702
EVM0028297	3	TRAM/LAG1/CLN8 domain containing protein [Parasponia andersonii]	13.928	10.6706	30.9717	16.8886	5.69975	5.5548	4.51015	3.53716	4.67272	9.09861	5.06275
Liquidambar_formosana_newGene_10111	3	PREDICTED: probably inactive leucine-rich repeat receptor-like protein kinase At5g48380	0.026291	0.871627	3.36578	1.50748	0.541923	0.762312	0.375887	1.54415	0.121475	0.798307	1.73575
EVM0017014	3	MYB transcription factor 3 [Betula platyphylla]	1.77684	5.38342	16.5287	9.13902	2.74845	2.02054	0.611668	0.366334	0.0693313	2.31053	1.33166
EVM0023539	3	hypothetical protein VITISV_016361	0.379131	1.8967	3.5703	1.54777	0.125747	0.175256	0.375	0.538406	0.699332	1.58967	0.0202707
EVM0011331	3	PREDICTED: F-box/LRR-repeat protein At4g14103 isoform X2	0.279509	0.555857	1.60738	1.14234	0.617823	0.466803	0.70667	0.284036	0.281494	0.382379	0.569293
EVM0015162	3	PREDICTED: phospholipase A1-Igamma1, chloroplastic [Theobroma cacao]	2.15065	11.3333	32.7287	20.6236	14.0304	6.84746	3.99435	1.75603	4.31395	9.42935	3.67365
EVM0005276	3	PREDICTED: chromatin accessibility complex protein 1	10.0523	6.26144	22.3396	4.64096	2.07949	2.34634	1.59919	1.28508	0.213041	2.2855	1.73513
EVM0025023	3	putative pentatricopeptide repeat-containing protein At5g43820	4.37674	4.43197	8.50359	5.74288	3.75068	3.64453	4.47899	4.58065	1.54888	2.89611	2.45368
Liquidambar_formosana_newGene_4713	3	hypothetical protein VITISV_008903	0.29763	0.208857	1.03045	0.580169	0.442716	0.0547433	0.113294	0.183444	0.0122747	0.137862	0.043894
EVM0004269	3	PREDICTED: protein MOR1 isoform X3	14.2555	11.7342	18.7444	16.1832	15.3853	11.3321	13.8437	14.7999	8.82129	10.8206	16.5457
EVM0019816	3	PREDICTED: uncharacterized protein LOC100255631 isoform X1	85.8173	64.8336	148.03	94.4883	38.8163	32.5937	46.5505	47.4586	56.4296	54.97	74.353
EVM0004132	3	ABC transporter G family member 10	0.766843	2.30056	5.7562	3.08606	1.02043	0.610714	0.261992	0.185084	0.00473167	0.948258	0.595168
EVM0015018	3	phytosulfokine receptor 1-like isoform X1	0.27838	0.995657	1.95475	0.811313	0.0848553	0.0554267	0.139229	0.682767	0.367584	0.0419537	0.099637
EVM0000561	3	PREDICTED: uncharacterized protein LOC105111436	0.730333	0.896198	3.00872	0.262668	0.679152	0.312708	0.158635	0.261633	0.590348	1.38263	0.985181
EVM0012399	4	PREDICTED: laccase-7	11.7282	28.134	63.8496	329.265	10.9896	6.56877	5.70398	2.21799	0.188008	101.109	0.475695
EVM0029069	4	PREDICTED: probable inactive receptor kinase At5g58300	5.00379	4.4111	5.92022	10.3896	2.4888	3.55756	1.5251	2.15532	2.14259	4.02372	6.63462
EVM0001963	4	uncharacterized protein LOC105628689 [Jatropha curcas]	0.660567	2.20955	2.21849	5.67851	1.58665	0.631647	0.746267	1.17953	2.81525	2.69693	0.849864
Liquidambar_formosana_newGene_7096	4	uncharacterized protein LOC109821182 [Asparagus officinalis]	1.45533	1.22223	1.16188	2.7998	1.33272	0.792596	0.742005	1.37583	1.58192	0.724308	1.43626
EVM0019661	4	cationic peroxidase 1-like	0.181405	0.0231077	0.472104	6.69308	0.238019	0.242336	0.0456623	0.0577733	0.035691	1.28567	0.922024
EVM0017143	4	proline transporter 2-like	2.81434	1.72204	1.178	14.3465	0.401775	2.55787	1.785	2.23333	4.52626	2.93201	2.54834
EVM0018562	4	7-deoxyloganetin glucosyltransferase-like	6.70737	17.7089	43.1613	89.1699	24.3144	37.6981	14.1904	8.58218	37.4996	47.42	25.0382
EVM0020076	4	PREDICTED: protein ROOT PRIMORDIUM DEFECTIVE 1	3.6983	4.82482	3.1219	5.73682	2.46263	2.91995	3.74953	3.65557	4.21835	3.49748	4.31126
EVM0009681	4	PREDICTED: putative disease resistance protein At1g50180	1.4082	3.34987	0.892645	6.44621	0.207857	0.0755053	0.312399	0.274131	2.95157	2.63468	1.05076
EVM0002073	4	unnamed protein product, partial	0	0.11221	0.528065	2.83758	0.0760057	0	0	0	0	0	0
EVM0026698	4	PREDICTED: DUF724 domain-containing protein 3 isoform X1	0.104001	0.989048	0.478095	1.67291	0.934106	0.483315	0.269128	0.221638	0	0	0.0675423
EVM0023107	4	probable 6-phosphogluconolactonase 1 isoform X2	0	0.302925	0.119532	3.65822	0.051802	0.0447573	0.0143623	0	0	0.137374	0.0374167
Liquidambar_formosana_newGene_13457	4	hypothetical protein VITISV_021427	3.27866	2.26343	4.99082	6.2056	2.83527	3.03088	3.23143	3.10661	3.04626	3.84879	3.83917
EVM0015397	4	PREDICTED: lysine-specific demethylase JMJ25 isoform X4	8.32828	13.315	11.7381	20.3193	14.9562	10.8118	11.057	12.366	13.493	15.3703	15.8014
EVM0015534	4	PREDICTED: cytochrome P450 71D11-like	1.44706	2.43444	1.53438	14.3486	1.63539	0.550745	2.38116	4.03551	0	5.28241	0.182272
EVM0026799	4	PREDICTED: proactivator polypeptide-like 1	133.325	119.576	113.84	243.485	95.1008	98.5628	83.9935	100.144	143.256	155.448	88.3773
Liquidambar_formosana_newGene_11530	4	Function unknown	0.122556	0.767477	1.11642	3.42027	0.359036	0.545465	0.058699	0.152818	0	0.0629907	0
EVM0026180	4	PREDICTED: mediator of RNA polymerase II transcription subunit 12 isoform X2	27.105	23.7747	30.3445	41.3572	24.4466	20.6546	20.0386	20.4761	30.0671	24.1098	23.2089
EVM0019586	4	disease resistance protein RPM1-like	5.95687	7.13214	6.26762	10.4677	6.32554	4.70124	5.1838	6.3522	7.8507	5.87217	6.75568
EVM0003430	4	PREDICTED: ABC transporter C family member 13 isoform X3	7.49843	5.59337	5.11529	11.5712	3.1169	3.0325	2.97053	4.99575	6.4429	5.37419	6.17318
EVM0003104	4	PREDICTED: transcription factor bHLH18	0.878181	2.3227	5.6352	56.5132	0.57505	1.03944	0.0752177	0	0	9.42239	0
EVM0019999	4	germin-like protein subfamily 1 member 11	0.106456	1.69636	2.85934	33.778	0.573199	0.357996	0.01644	0.049396	0	1.45199	0
EVM0003557	4	PREDICTED: COBRA-like protein 4 isoform X1	1.5739	6.21101	4.69835	29.7103	1.21981	0.320074	0.65213	0.35615	0.0279133	11.7757	0.034016
EVM0003554	4	hypothetical protein POPTR_0001s10240g	0.177974	1.37173	0.864253	8.5648	0.184294	0.127008	0.162742	0.100408	0.0980927	0.740191	0.24369
EVM0026807	4	PREDICTED: receptor-like protein kinase 5	2.04647	1.8268	1.64075	7.5028	1.61254	1.20279	1.64678	1.8733	1.65927	2.28067	4.45467
EVM0018471	4	cyclin-dependent protein kinase inhibitor SMR10-like	3.45933	2.23275	3.04808	11.0775	0.193922	0.0824507	0	0.751252	0.137449	3.89838	3.96199
EVM0014233	4	PREDICTED: UDP-glycosyltransferase 83A1	7.07758	5.35695	3.71877	11.1689	3.23026	3.04504	3.449	3.12978	4.27655	5.66773	4.72657
EVM0023585	4	hypothetical protein CUMW_146040 [Citrus unshiu]	2.0366	2.13831	2.57724	3.50616	1.46931	1.66531	1.746	2.29996	1.4388	2.1759	2.41658
EVM0000095	4	PREDICTED: uncharacterized protein LOC104881693	0.703188	3.07305	0.992271	27.2067	0.280686	0.323033	0.128093	0.187982	0.508306	3.45997	0.298908
EVM0023240	4	PREDICTED: uncharacterized protein LOC109010985	44.959	33.9266	22.7986	67.6533	19.4292	16.5828	21.9307	22.2176	41.4451	31.8175	33.3268
EVM0013046	4	PREDICTED: cytochrome P450 714C2-like	0.538636	4.8402	4.26216	15.168	0.715857	0.232094	0.184431	0.302365	0.0551937	4.6757	2.08152
Liquidambar_formosana_newGene_4597	4	Function unknown	0	0.258618	1.31312	3.55881	0.028233	0	0.068928	0.014014	0.0758933	0.800548	0.168201
EVM0021969	4	protein PLANT CADMIUM RESISTANCE 2-like	0.597993	0.371152	0.353578	6.15148	0.218875	0.05558	0.0542973	0.020099	0	1.63617	0.223806
EVM0017546	4	beta-carotene hydroxylase	5.56892	9.06862	9.17257	33.8224	2.9079	2.35624	1.94037	0.827039	1.31984	14.0346	0.766428
EVM0018158	4	caffeic acid 3-O-methyltransferase 1	0.586958	1.06628	0.631609	3.80114	0.119144	0.11123	0.0371713	0	0	0.0750117	0
Liquidambar_formosana_newGene_6385	4	Function unknown	0.384761	0.165274	1.07023	1.79811	0.294603	0.312725	0.380947	0.243351	0	0.269237	0.227749
EVM0012459	4	nuclear transcription factor Y subunit A-10-like [Herrania umbratica]	3.93606	74.1989	45.0323	158.277	56.9648	51.1119	34.2612	36.0698	4.06016	71.5173	55.4147
EVM0020472	4	unnamed protein product, partial	7.09133	8.28234	6.47358	35.5674	3.46414	3.2733	1.0012	1.07601	4.61251	9.5888	3.64937
EVM0028085	4	PREDICTED: putative RING-H2 finger protein ATL21A	2.84846	3.67128	3.25246	14.511	0.807058	0.804903	0.3659	0.166498	0.079141	6.37571	0.468263
EVM0011195	4	PREDICTED: desiccation-related protein PCC13-62	0.752415	9.45338	1.81459	18.1424	0.764521	0.413848	0.181874	0.104741	2.72812	5.39998	1.00666
EVM0022011	4	PREDICTED: probable boron transporter 2	20.759	16.8275	10.1691	77.6048	4.53918	3.23084	2.91188	1.81613	3.63142	15.6077	19.2558
EVM0023825	4	uncharacterized protein LOC18790491 [Prunus persica]	26.4613	32.055	25.2487	47.2037	33.2362	28.0305	26.0084	27.1005	29.9494	35.4016	18.9849
EVM0008928	4	PREDICTED: histone-lysine N-methyltransferase ATXR3	26.1519	29.673	36.7808	53.9137	24.5912	22.4501	14.2711	18.1561	27.1871	24.2033	23.0151
EVM0020203	4	protein ELF4-LIKE 4 [Jatropha curcas]	28.011	29.9732	18.558	48.2495	16.4299	18.3503	19.6921	16.5264	31.9271	18.1129	30.593
EVM0009952	4	PREDICTED: probable S-adenosylmethionine-dependent methyltransferase At5g37990 isoform X1	0.137387	1.77686	0	22.072	0.0529037	0	0.0662287	0	0	4.24448	0
EVM0012037	4	PREDICTED: myosin-17 isoform X1	16.747	16.1261	18.3107	43.7143	5.92271	5.2822	4.30011	5.5407	18.6831	16.8711	14.8187
EVM0011231	4	uncharacterized protein LOC112002346	2.8356	3.32169	5.44061	22.2668	0.347756	0.177438	0.0819257	0.103037	0.022289	6.22797	0.784108
Liquidambar_formosana_newGene_7649	4	hypothetical protein VITISV_006250	1.56415	0.48933	1.32078	3.13182	0.10513	0.0758567	0.0364893	0.021142	0	0.31521	0
EVM0000493	4	aldehyde oxidase GLOX1-like	44.1361	10.9768	5.15827	93.9542	5.47001	3.992	2.71359	1.46057	0.483618	28.0091	1.00586
EVM0027180	4	PREDICTED: high affinity nitrate transporter 2.5	8.33656	7.67223	5.85012	26.5021	1.46973	2.99677	1.49055	1.95356	6.57994	8.94763	1.11682
EVM0004512	4	PREDICTED: lysine-specific demethylase JMJ25 isoform X5	7.66422	14.855	11.8621	24.7355	13.7941	9.23556	9.49677	11.3548	11.2659	12.4058	11.0943
EVM0012372	4	uncharacterized protein LOC110639423 isoform X2	1.04038	1.59492	1.02848	5.24697	0.319141	0.569667	0.483164	0.291831	0.257766	1.80005	1.54649
EVM0004707	4	unnamed protein product, partial	0.222346	0.712505	5.18431	10.7767	0.730373	0.397732	0.137246	0.288835	0.0174077	2.12729	0.0102447
EVM0027105	4	unnamed protein product, partial	11.3247	12.5069	13.813	22.3101	9.26937	8.67224	8.8195	10.6698	9.11261	10.8551	10.7111
Liquidambar_formosana_newGene_14678	4	zinc finger MYM-type protein 1-like [Olea europaea var. sylvestris]	0.652819	0.374734	0.810357	1.91158	0.445191	0.228901	0.302588	0.172117	0	0.0475697	0.152555
EVM0020943	4	non-specific phospholipase C3-like	5.99768	16.665	20.4216	42.4022	1.97022	1.02115	0.614578	0.196899	0.276052	13.6458	1.68679
EVM0009184	4	transcription factor LAF1-like [Durio zibethinus]	0.318996	0.824015	0.684944	14.3871	0.245922	0.167641	0.0823253	0.0597583	0.388339	5.9522	0.0338587
EVM0004259	4	PREDICTED: uncharacterized protein LOC109190669 [Ipomoea nil]	24.2248	37.5223	46.1758	140.474	8.82378	6.04922	4.52402	3.5071	1.69804	33.9609	6.1255
EVM0019191	4	pentatricopeptide repeat-containing protein At5g57250, mitochondrial	5.8815	6.39886	3.25233	10.1383	2.21629	2.13759	3.24611	4.9419	4.09848	3.62163	5.71549
EVM0009652	4	ultraviolet-B receptor UVR8	12.4424	12.5715	15.7796	32.0081	4.67672	4.72768	3.52772	4.78839	6.99262	13.2404	10.2783
EVM0005303	4	PREDICTED: uncharacterized protein LOC104594431	0.714441	1.92023	1.91756	8.03664	0.017196	0.150282	0.0856147	0.0584567	0.0829303	0.948891	0.233035
EVM0026634	4	PREDICTED: aldose 1-epimerase	3.70909	2.66009	4.69692	9.18327	5.72245	1.29353	2.36616	2.38735	1.60967	5.12014	3.9725
EVM0018937	4	PREDICTED: indole-3-acetic acid-amido synthetase GH3.6	36.043	14.4669	30.6462	74.0193	8.74121	12.7638	10.3556	18.6451	0.955462	19.8056	30.5672
EVM0022688	4	PREDICTED: sugar transporter ERD6-like 5 isoform X2	8.84157	31.4412	27.8164	117.216	5.53202	2.91044	1.5562	0.521471	3.45913	34.747	0.924604
Liquidambar_formosana_newGene_10776	4	--	0.021732	0.203848	0.512985	1.904	0.049396	0.074576	0.0336407	0.0506717	0.013829	0.268776	0.164526
EVM0012406	4	PREDICTED: tetratricopeptide repeat protein 7A-like	10.1978	11.7962	11.731	17.0606	8.37777	5.4781	6.21844	6.44776	10.1878	9.55589	8.03209
EVM0018080	4	PREDICTED: F-box/LRR-repeat protein 3-like isoform X1	5.30871	7.22224	6.91936	17.8082	1.83206	1.39874	1.43452	1.03134	1.56155	4.42365	5.50582
EVM0012234	4	probable disease resistance protein At4g27220	1.23829	1.15592	1.11171	6.32331	1.66261	0.460913	0.391196	0.559418	2.4523	0.934518	1.16684
Liquidambar_formosana_newGene_1853	4	putative receptor-like protein kinase At4g00960 isoform X1 [Durio zibethinus]	0.231919	0.589699	0.733598	3.35255	0.367269	0.415913	0.142411	0.247105	1.15206	0.575693	1.36473
EVM0004941	4	PREDICTED: ras-related protein RABF1	26.7799	27.2458	21.5279	39.5447	26.3697	25.7068	16.9868	17.51	16.426	29.0314	24.5671
EVM0020560	4	hypothetical protein POPTR_018G138500v3	0.281001	0.372952	0.231292	2.16105	0.23566	0.191891	0.480334	0.867764	1.20943	0.239926	0.728849
EVM0018513	4	PREDICTED: serine/threonine-protein kinase HT1-like	45.4323	45.4414	63.9939	97.3541	47.4749	37.8722	38.1469	41.837	57.6542	41.7896	24.3549
Liquidambar_formosana_newGene_2764	4	UPF0481 protein At3g47200-like	0.00878567	0.212417	1.77901	4.93589	0.00662233	0.021273	0.0332177	0	0	0.0919337	0
EVM0007113	4	alpha-mannosidase At3g26720-like isoform X1	56.3897	51.3516	43.9855	77.9676	36.9978	36.6021	36.4801	35.3627	40.4018	43.6104	45.8063
EVM0013739	4	glutamate receptor 2.9	0.315374	1.45627	1.17598	5.67638	0.0497273	0.197984	0.067298	0	0	1.53411	0
EVM0004059	4	Glutamate receptor 2.8, putative [Theobroma cacao]	0.2948	0.228023	0.674126	2.58	0.253211	0.0420517	0.027505	0.050618	0	0.378738	0
Liquidambar_formosana_newGene_757	4	hypothetical protein CCACVL1_07965 [Corchorus capsularis]	0.711311	0.0740577	0.608964	2.60808	0.0141257	0	0.019417	0	0	0	0
EVM0021764	4	PREDICTED: mechanosensitive ion channel protein 10-like [Pyrus x bretschneideri]	8.42438	7.35536	5.29504	26.6917	3.69524	3.21652	7.4022	5.63402	7.25279	13.8629	9.09147
EVM0020141	4	Cyclin [Macleaya cordata]	0.0289413	1.65556	0.875602	10.6701	0.262199	0.595657	0.373056	0.071997	0.0181797	0	0
EVM0012118	4	hypothetical protein POPTR_0006s12530g	6.72011	21.2703	24.8316	74.0086	16.0428	14.033	12.5868	4.6713	0.150675	32.962	1.39782
EVM0000136	4	serine/threonine-protein kinase HT1-like [Cucurbita maxima]	13.179	30.2181	20.1849	56.2683	12.212	10.7157	11.3534	16.2206	8.07291	29.2145	9.041
EVM0002960	4	hypothetical protein POPTR_0011s15910g	47.86	67.8603	56.9755	212.323	4.53242	2.62139	0.834782	1.27665	1.02361	65.4886	3.31798
EVM0027214	4	PP2 domain-containing protein	2.97578	3.14496	3.37237	13.8402	5.39744	1.58154	2.03376	1.6001	6.62981	2.03632	3.5029
EVM0010493	4	tropinone reductase homolog At2g29150-like	3.8059	3.94149	4.69262	13.3137	2.42511	0.903883	0.604669	0.504528	0.759585	4.17476	0.0654813
Liquidambar_formosana_newGene_13020	4	PREDICTED: putative disease resistance protein At1g50180 isoform X2	1.42194	2.55064	0.957629	13.8504	2.04101	0.932344	2.06881	5.1104	6.03598	2.43983	2.6086
EVM0020886	4	PREDICTED: feruloyl CoA ortho-hydroxylase 2	7.29132	16.5546	26.319	59.8071	2.04013	1.77861	0.451271	0.399453	0.318256	10.7463	0.034349
EVM0017269	4	ankyrin repeat-containing protein ITN1-like isoform X3	0.055131	1.60758	2.6337	11.7931	0.605833	0.162671	0.313186	0.246107	0	0.479771	0.00599067
EVM0022929	4	stay-green 1 [Liquidambar formosana]	11.6347	21.7331	20.9463	69.4633	3.61646	2.55994	2.2122	2.40756	23.1944	31.8472	14.03
EVM0026348	4	probable nucleoredoxin 1	1.37018	1.11666	1.55409	4.0421	0.873358	0.874789	0.805917	0.663939	0.420157	1.57265	0.308996
EVM0006904	4	Transferase	9.98936	3.67612	3.14357	20.4096	2.55305	0.903884	2.44004	0.632104	0	6.88998	0.040917
EVM0008572	4	isoliquiritigenin 2&apos;-O-methyltransferase-like isoform X2	0.0653093	2.04961	2.55026	8.63658	0.600346	0.342669	0.29023	0.0937113	0	2.20564	0
EVM0007751	4	PREDICTED: pleiotropic drug resistance protein 3	1.62417	3.52851	2.27895	24.3818	0.348401	0.162394	0.180173	0.225493	0.0505383	5.60792	0.364288
EVM0013121	4	PREDICTED: UDP-glycosyltransferase 74F2-like	3.10837	12.7265	2.99361	91.0556	7.41681	6.94931	4.88334	3.08868	0.0617083	30.0893	0.095363
EVM0028904	4	PREDICTED: glutelin type-A 3 isoform X2	4.58982	3.67809	6.0329	13.1119	0.221685	0.149766	0.0284437	0.0731277	0.149263	3.08582	0.421691
EVM0000474	4	PREDICTED: protein kinase 2B, chloroplastic	36.1506	36.9048	33.2875	99.5594	14.5796	8.82538	10.9859	15.919	53.0777	41.6877	46.9085
EVM0000470	4	PREDICTED: lysine histidine transporter-like 8	0.251932	1.79579	0.913124	13.1835	0.410626	1.13526	0.0953263	0.401533	0.429853	0.706713	1.07733
EVM0027295	4	PREDICTED: protein PLANT CADMIUM RESISTANCE 9-like [Fragaria vesca subsp. vesca]	2.00476	1.61038	2.25618	12.8061	0.262467	0.321549	0.0647413	0.066608	0	0.982349	0.0610267
EVM0028021	4	F-box protein At5g67140	6.05274	7.60397	12.579	19.8304	7.02603	5.70825	6.36038	9.33854	9.65457	10.5545	6.37412
EVM0023889	4	Glutamate receptor 2.8, putative [Theobroma cacao]	0.391187	0.284811	0.697907	3.95197	0.166013	0.0216347	0.0302197	0.0539947	0	0.0602837	0
EVM0011556	4	PREDICTED: transcription repressor MYB4-like	4.58916	0.958835	1.05873	15.2834	1.45749	1.83202	0.710986	1.20622	2.97285	6.68148	4.0772
EVM0020518	4	ABC transporter B family member 15-like	7.82757	15.0368	6.93035	69.2964	3.75749	2.96994	2.47952	1.9148	0.0852163	12.3002	0.04125
EVM0014705	4	receptor-like protein kinase [Vitis amurensis]	1.32424	1.60756	1.75067	3.45545	0.835562	0.717341	0.92483	1.30466	0.892952	1.25785	1.84718
EVM0019615	4	phytochrome C	10.5781	14.0983	7.44194	20.4863	7.51736	9.50007	8.74689	9.71466	12.7212	12.3269	13.4571
EVM0023320	4	PREDICTED: myb-related protein 315-like	2.17813	2.7055	0.952337	21.6864	1.28551	0.467627	0.265603	0.483096	0.150386	4.22812	0.547489
EVM0019515	4	protein of unknown function DUF1713 [Macleaya cordata]	7.48387	7.25232	4.38545	12.4613	3.68558	3.93486	4.63197	4.4653	4.81781	5.10898	6.18822
EVM0015350	4	uncharacterized protein LOC111276317 [Durio zibethinus]	0.965456	1.44267	0.658342	4.25697	0.424454	0.182822	0.27782	0.102092	0.0601593	1.35119	0
EVM0005286	4	PREDICTED: vesicle-associated protein 2-1-like isoform X4	17.3529	14.0323	20.7618	30.5022	18.4175	15.1514	16.2962	14.7922	15.0792	20.4856	17.6546
EVM0022209	4	PREDICTED: probable caffeoyl-CoA O-methyltransferase At4g26220	0.993188	10.6036	1.62049	73.2883	0.963937	0.449331	0.640162	1.11258	0	4.04148	0
EVM0028348	4	PREDICTED: proline-rich receptor-like protein kinase PERK8	14.4732	16.1298	22.9841	39.6511	14.9558	13.2516	9.86068	8.78387	6.94992	20.1815	14.2855
EVM0000080	4	TPS05 [Liquidambar formosana]	0.11543	0.0563393	0.394919	0.922387	0.119677	0.126168	0.094987	0.0801303	0.14838	0.32736	0.310654
EVM0017551	4	geraniol 8-hydroxylase-like isoform X1	2.0016	6.04397	0.590854	26.4109	3.14697	0.958453	1.10649	1.32286	4.78058	9.69554	1.9794
EVM0017554	4	Glycolipid transfer protein domain [Macleaya cordata]	2.21311	3.75136	2.3313	19.6693	1.15618	0.784267	1.44989	1.3381	1.73009	8.60473	4.19444
EVM0021147	4	PREDICTED: receptor-like protein kinase 5	4.51932	3.98619	3.28408	10.9683	3.68843	2.90499	3.74903	4.60326	2.39165	6.01896	6.93703
EVM0016959	4	PREDICTED: L-type lectin-domain containing receptor kinase IX.1	4.48495	3.40288	3.95333	11.406	0.596291	0.29688	0.266122	0.0957027	0.315277	2.56946	0.2018
EVM0010699	4	calcineurin B-like protein 10 isoform X7 [Sesamum indicum]	13.8211	15.2844	18.6326	34.5257	15.5094	13.0869	15.5204	17.0229	11.9303	21.4174	15.835
EVM0003222	4	PREDICTED: benzyl alcohol O-benzoyltransferase-like	13.8202	12.6134	6.87503	26.1129	5.57084	7.13944	4.40055	5.93636	5.13832	13.4652	6.69199
EVM0011817	4	PREDICTED: glutamate receptor 2.8-like	0.761817	2.49399	1.81739	5.41869	0.15932	0.0206023	0.0786887	0.0390563	0	1.72253	0
EVM0002406	4	PREDICTED: uncharacterized protein LOC100854033	0.059502	0.465032	0.303795	6.96134	0.064953	0.029572	0	0.167626	0.141157	2.78131	0.172742
EVM0021731	4	PREDICTED: NAC domain-containing protein 21/22	7.19583	10.9759	2.34402	41.1154	0.870283	0.909326	1.53859	0.644761	2.06304	7.44024	5.67004
EVM0026513	4	PREDICTED: probable caffeoyl-CoA O-methyltransferase At4g26220 isoform X3	5.25631	7.45663	5.52255	10.45	4.59699	5.07656	4.37527	5.22931	4.40588	7.53776	5.95027
EVM0026518	4	PREDICTED: LOW QUALITY PROTEIN: flavonol sulfotransferase-like	33.123	20.2795	18.8753	102.95	3.39643	1.85242	1.01319	1.42968	0.159837	33.4217	0.419617
EVM0013795	4	PREDICTED: U-box domain-containing protein 1	0.407791	0.526083	0.405729	2.24055	0.349232	0.102602	0.0852283	0.049711	0.0123547	1.10445	0
EVM0019233	4	unnamed protein product, partial	8.44924	6.25829	3.83299	18.2559	2.70875	1.92745	2.64842	2.16479	2.38047	5.66356	3.61085
EVM0028535	4	transcription factor bhlh25	4.10927	14.1693	7.52037	90.2825	1.92296	2.43068	0.635225	0.661901	4.57333	28.1829	27.1329
EVM0017682	4	PREDICTED: vesicle transport protein GOT1B [Ricinus communis]	14.747	16.9581	21.0163	28.7869	16.825	16.3254	15.5633	15.2562	14.3554	21.5452	15.4537
Liquidambar_formosana_newGene_7673	4	hypothetical protein POPTR_008G026200v3	0	1.6859	1.7234	19.0499	0.639303	0.177767	0.147825	0.0225873	0	0.0497	0
EVM0009436	4	PREDICTED: TMV resistance protein N-like	1.68535	1.58947	2.20779	3.20358	1.33885	0.980122	0.736402	1.77021	0.966299	1.28562	2.11115
EVM0002525	4	PREDICTED: trans-cinnamate 4-monooxygenase	119.373	75.5703	77.701	323.965	63.1353	72.9651	27.4624	32.1254	28.5593	116.314	43.6399
EVM0002528	4	Cytochrome P450 isoform 1 [Theobroma cacao]	0.050843	2.88751	2.48278	6.82023	0.379401	0.0824057	0	0.115499	0	1.68697	0.9676
Liquidambar_formosana_newGene_11041	4	Function unknown	1.14698	2.66831	1.72844	9.75888	0.512098	0.60866	0.246351	0.360175	0.345257	1.57165	0.303937
Liquidambar_formosana_newGene_5236	4	LOW QUALITY PROTEIN: uncharacterized protein LOC112033305	0.828744	2.18027	0.682392	12.5516	1.27632	0.680974	1.69648	3.95717	2.55843	1.41798	1.41146
Liquidambar_formosana_newGene_12833	4	Function unknown	1.45142	0.885717	0.94011	25.4361	0.505058	0.365107	0.311668	0.265714	0.0630467	1.83692	0.117263
EVM0007682	4	PREDICTED: receptor-like kinase TMK4	34.4069	33.5161	29.6781	81.1673	19.6946	18.4503	21.9485	26.457	12.5834	40.2797	26.3019
EVM0026338	4	PREDICTED: geraniol 8-hydroxylase isoform X1	0.627981	0.565787	0.106914	1.87445	0	0	0	0.0346853	0	0	0
EVM0028805	4	PREDICTED: pumilio homolog 5 isoform X2	29.8213	27.1647	28.5098	50.8032	26.7301	24.0522	22.3751	26.7972	28.7608	29.6858	24.1693
EVM0008809	4	PREDICTED: transcription factor BIM1	10.967	9.36902	11.4441	25.8514	1.63498	2.21808	3.19225	3.54445	6.38271	7.01561	8.14227
EVM0004690	4	F-box domain [Macleaya cordata]	12.3367	12.1135	16.7783	37.9558	11.3536	3.92961	4.92415	5.6013	5.28785	8.23938	11.1154
EVM0028073	4	uncharacterized protein LOC110639423 isoform X2	1.63138	3.21055	2.68597	11.4676	0.479917	1.40254	0.813215	0.268204	0.27531	2.38134	2.08858
EVM0019857	4	cationic amino acid transporter 4, vacuolar [Prunus persica]	31.0347	25.3472	30.7935	59.7518	30.9158	21.0023	14.7763	15.2586	31.611	31.0276	11.1225
EVM0021254	4	PREDICTED: EG45-like domain containing protein	9.61498	4.22011	5.83748	25.1003	0.405095	0.676693	0.107413	0.306985	0.039963	6.86832	0.685509
EVM0014757	4	CBL-interacting protein kinase 08	11.8961	16.9018	28.6762	42.8399	11.0899	10.1716	7.2292	6.889	12.5084	20.6537	17.7267
EVM0023464	4	PREDICTED: phosphoinositide phosphatase SAC3-like isoform X1	41.709	39.712	53.782	105.821	24.1891	18.8819	18.0427	22.6009	57.4368	48.607	23.6284
EVM0001602	4	unnamed protein product, partial	1.00186	2.99281	1.46004	12.5766	0.160636	0.101837	0.18307	0.208341	0	1.46262	0.00857867
EVM0000268	4	pumilio homolog 6, chloroplastic	38.8389	34.962	29.3876	49.6553	33.6249	35.683	29.4005	31.7931	36.3748	38.0118	37.2206
EVM0010263	4	PREDICTED: lecithin-cholesterol acyltransferase-like 4	76.7921	71.9871	81.9409	108.73	65.2348	50.5523	64.3265	81.3319	80.6633	77.1774	74.4434
EVM0004563	4	PREDICTED: mechanosensitive ion channel protein 10-like [Pyrus x bretschneideri]	13.0226	20.7506	27.3217	58.9742	12.1112	9.51576	15.1771	19.2455	3.59032	21.9339	15.9192
EVM0025678	4	hypothetical protein Ccrd_016590 [Cynara cardunculus var. scolymus]	22.4241	20.778	14.1412	36.8715	13.8357	12.3848	13.4052	17.2814	18.7113	17.4791	20.2373
EVM0008751	4	PREDICTED: plant UBX domain-containing protein 1 isoform X2	36.8884	39.8164	40.3155	51.3301	33.011	32.0893	33.6776	33.5986	41.3831	42.007	37.3228
EVM0015810	4	PREDICTED: UDP-glycosyltransferase 74F2-like	0.377967	1.0787	0.49452	4.32365	0.644434	0.53681	0.384408	0.550992	1.07826	1.28051	0.257191
EVM0024198	4	PREDICTED: LOW QUALITY PROTEIN: 3-ketoacyl-CoA synthase 19 [Ricinus communis]	0.00955233	1.93202	0.543187	4.13228	0.190491	0.20365	0.111196	0.0733697	0.472964	0	2.02016
EVM0005333	4	PREDICTED: NEP1-interacting protein 1-like isoform X1 [Fragaria vesca subsp. vesca]	0.368503	2.73996	18.1496	38.3889	0.449411	0.697751	0.163435	0.192269	0	2.01871	0.0992027
EVM0027237	4	hypothetical protein VITISV_012787	1.47922	1.32039	1.35727	7.4698	0.415953	0.427379	0.211392	0.408211	0.344795	2.15697	0.232776
EVM0013164	4	uncharacterized protein LOC111988138	5.39901	8.1065	9.17222	14.368	5.48305	6.64095	4.03546	3.98908	8.62234	8.65837	5.25793
EVM0002457	4	uncharacterized membrane protein At3g27390	6.30398	10.1277	6.0599	30.2125	14.9248	13.2535	5.87478	5.37906	3.60684	16.5987	6.33758
EVM0016885	4	cationic peroxidase 1-like	1.87231	0.841202	4.27829	105.421	3.45879	3.76186	0.514231	1.66116	0.190889	4.71165	0
EVM0029319	4	GDSL esterase/lipase At5g14450-like	2.15655	2.28352	0.87717	11.5606	0.043225	0.0339717	0	0.153058	0	1.10114	0.0242177
Liquidambar_formosana_newGene_13948	4	Function unknown	0.811046	0.452641	1.55087	10.1734	0.355109	0.336576	0.486809	0.586903	0	0.651889	0.00582833
EVM0001732	4	UDP-glycosyltransferase 74G1-like	0.551218	0.85078	1.21819	4.88059	0.155985	0.130371	0.0276363	0	0	0.461269	0
EVM0025531	4	Isopenicillin N synthase [Parasponia andersonii]	0	0	0	10.2707	0	0	0	0.0261133	0	0.608092	0
EVM0014820	4	PREDICTED: calmodulin-like protein 3	53.9763	72.8711	99.0926	153.566	37.8871	23.999	43.8178	49.5953	41.9792	71.9585	40.5805
EVM0021947	4	cytochrome P450 71A1-like	1.62786	7.28582	1.3927	108.098	0.591187	0.219085	0.877528	0.248167	0.0120433	4.36365	0
EVM0004369	4	PREDICTED: ACT domain-containing protein ACR6-like	7.17131	4.61294	8.02768	39.0372	7.83101	10.2884	11.9797	15.4449	6.32409	10.0972	8.29427
EVM0003832	4	laccase-14-like	1.74264	0.884755	0.815788	8.6239	3.18953	1.18217	0.701848	0.812036	0.279511	1.36683	2.20948
EVM0011740	4	PREDICTED: putative laccase-9 [Eucalyptus grandis]	0.27117	1.99925	0.517994	4.79084	0.0923717	0.00924667	0.249686	0.0112187	0	0	0
EVM0001202	4	PREDICTED: LOW QUALITY PROTEIN: flavonol sulfotransferase-like	65.5095	58.4135	46.8175	277.381	12.4785	5.88268	3.97326	4.55137	0.340553	71.4362	0.912225
EVM0000554	4	hydroquinone glucosyltransferase-like	30.2023	57.2577	35.0566	275.327	29.6004	25.0323	12.8882	4.12581	0.949519	56.4875	0.577963
EVM0014512	4	AP2/ERF domain [Macleaya cordata]	2.79144	2.02675	1.12441	18.1507	0.548334	0.347742	0.239908	0.36273	0.0789277	5.24091	1.52194
EVM0006061	4	PREDICTED: methylesterase 17	123.822	198.859	98.0419	482.803	35.5315	21.6735	49.4851	63.155	19.6565	248.12	92.8594
EVM0014726	4	uncharacterized protein LOC18779221 [Prunus persica]	1.9187	1.53172	1.42073	4.83185	0.264985	0.101298	0.141532	0.118014	0.589834	1.57058	1.47769
EVM0021465	4	PREDICTED: UDP-glucose iridoid glucosyltransferase [Theobroma cacao]	0.994935	8.67762	13.8529	29.0508	6.43206	3.98275	1.57817	0.512635	0.038829	9.25796	0.0328827
EVM0001583	4	terpene synthase 2	48.7376	45.132	65.7287	218.532	7.2032	3.39485	1.28346	1.80204	0.22664	37.8389	2.67712
EVM0020324	4	PREDICTED: cationic peroxidase 1	2.46554	1.49723	1.89501	6.49821	1.53375	0.457256	0.154256	0.116459	0	1.0802	0
EVM0025422	4	potassium transporter 5-like	0.359963	2.05329	2.75009	36.1783	0.350374	0.183018	0.190436	0.133104	0.060148	8.59766	0
EVM0022229	4	germin-like protein subfamily 1 member 7	0.447075	2.72409	6.15135	48.993	3.90233	1.4931	0.277878	0.199118	0	2.31905	0
EVM0020484	4	PREDICTED: proline-rich receptor-like protein kinase PERK4 isoform X1	5.97321	1.81139	5.91529	10.8813	3.90328	1.73904	3.79578	4.74994	1.74768	6.27141	4.25943
Liquidambar_formosana_newGene_14252	4	Retrotransposon gag protein [Corchorus capsularis]	0.195862	0.0359907	0.137869	0.939611	0.0438177	0.00754533	0.0160633	0.270993	0.419563	0.448554	0.402037
Liquidambar_formosana_newGene_4716	4	PREDICTED: transcription factor WER-like	0.213895	0.5592	0.89394	4.09793	0.0707387	0.048652	0	0.0705477	0	0.948397	0.0755823
EVM0012152	4	uncharacterized protein LOC105644073 [Jatropha curcas]	5.77222	5.31914	7.24114	15.0188	0.863229	0.484504	0.301176	0.341858	0.03282	4.41577	4.27029
EVM0029252	4	transcription factor bHLH130	22.3287	20.0416	19.4375	60.7955	1.2361	1.05631	0.611961	0.843611	5.84217	11.011	5.94727
EVM0016193	4	PREDICTED: transcription factor MYB3 [Eucalyptus grandis]	1.23512	1.34673	0.991828	4.35261	0.329176	0.419717	0.0775473	0.384199	0.053968	1.26211	0.941048
EVM0020393	4	PREDICTED: protein NLP4	3.22262	2.95909	4.03976	9.94673	1.74956	1.45267	0.96918	1.16051	3.96727	3.34847	1.76373
EVM0023052	4	tetraspanin-19-like isoform X1	6.77242	7.58539	3.81989	18.7704	4.38784	3.00323	2.02609	4.54718	7.32343	5.65203	3.95217
Liquidambar_formosana_newGene_6299	4	PREDICTED: protein SABRE isoform X3	9.68537	10.2178	11.0753	15.2496	8.02882	6.73284	5.69988	8.99304	8.32863	9.14599	9.78498
EVM0012275	4	myb family transcription factor PHL5-like isoform X3	0.13494	1.15144	1.02733	7.42926	0.0846537	0.059086	0.120533	0.007665	0.265566	0.0232767	1.08059
EVM0004908	4	BAHD acyltransferase BIA1-like [Durio zibethinus]	0.194828	0.285821	1.23813	2.00394	0.0100287	0.026714	0.0199767	0.055139	0.00729533	0.159897	1.00333
EVM0018559	4	PREDICTED: mediator of RNA polymerase II transcription subunit 15a isoform X1	5.05362	4.45906	4.60363	7.95909	3.56884	2.63856	2.82253	3.32488	5.1991	5.1988	3.81813
EVM0007807	4	UDP-glycosyltransferase 74G1-like	1.1169	2.74497	2.80661	7.91552	0.535874	0.580163	0.257478	0.0671623	0	2.57072	0.041519
EVM0000502	4	isoflavone reductase homolog PCBER-like	87.5812	134.5	92.4069	280.648	39.9968	11.3487	38.073	37.8665	35.8568	138.388	17.157
EVM0002024	4	potassium transporter 5-like	0.011305	2.14496	1.2534	4.23301	0.235926	0.096963	0.0952823	0.038595	0	0	0
EVM0026401	4	laccase-14-like	3.25951	7.84981	2.43567	25.5632	2.10675	2.30559	1.05117	2.97947	0.109118	9.55592	1.13784
EVM0008760	4	Peptidase_S10 domain-containing protein	2.62947	6.30989	0.667751	11.0499	0.89136	1.20999	0.52333	1.0501	0.458003	5.73139	1.76753
EVM0029168	4	PREDICTED: peroxidase A2	5.40308	15.0295	7.12644	36.0009	0.279636	0.163472	0.027741	0.0133513	0	7.38182	2.83548
EVM0013180	4	PREDICTED: laccase-7	0.145599	0.0424517	0.549757	3.55887	0.0496387	0	0.0788103	0.0102183	0	0.114136	0.00909667
EVM0005747	4	uncharacterized protein LOC112035269	1.04429	1.69278	0.581363	3.70111	0.557889	0.649708	0.76069	0.906968	0.61185	1.39016	1.26581
Liquidambar_formosana_newGene_5092	4	phytosulfokine receptor 1-like isoform X1 [Durio zibethinus]	0.830342	1.00018	0.974521	1.92313	0.556351	0.529115	0.645712	0.665032	0.408773	0.788188	1.37934
Liquidambar_formosana_newGene_10903	4	Function unknown	0.265514	0.670036	1.96382	3.40727	0.0915563	0.05185	0.0694197	0.0183637	0	0.0728443	0
EVM0022333	4	protein DMR6-LIKE OXYGENASE 2-like	34.1137	31.3947	63.1695	347.297	11.1303	11.707	6.27259	3.86899	1.0704	21.5076	0.200281
EVM0003317	4	NAC domain-containing protein 21/22-like [Cajanus cajan]	29.0086	14.0468	24.2606	73.553	12.3768	10.8785	3.43881	3.23535	8.66173	26.6398	2.00554
EVM0025143	4	PREDICTED: uncharacterized protein LOC100255180	4.87985	5.74848	6.61924	17.7492	0.672497	0.670217	0.799194	0.783849	1.01041	3.46879	1.08636
EVM0018281	4	truncated transcription factor CAULIFLOWER A-like [Durio zibethinus]	0	0.264296	0.440651	1.76948	0.487543	0.039983	0.669708	0.279162	0	0.915492	0.2789
EVM0005086	4	peroxidase 27 [Prunus persica]	4.06982	3.6551	0.762989	40.2691	3.35334	0.501191	2.22117	3.27627	0.145632	10.661	0
EVM0026268	4	PREDICTED: EGF domain-specific O-linked N-acetylglucosamine transferase	0.135079	0.448621	0.258954	3.46269	0.162411	0.0596857	0.031887	0	0.176767	0.489713	0.155478
Liquidambar_formosana_newGene_13273	4	putative disease resistance protein	1.44947	2.01752	2.33433	6.11974	1.24037	0.820151	0.883606	0.408262	0.121846	2.02983	0.270912
EVM0021030	4	PREDICTED: probable disease resistance protein At5g63020 isoform X2	1.75126	4.79483	2.69003	12.5041	1.18524	1.09066	0.781884	0.522617	0.0129707	4.35672	0.198859
EVM0020078	4	dynein light chain 2, cytoplasmic	30.5538	32.1726	31.6156	73.6902	31.144	23.0616	24.3978	28.2572	16.3879	42.3016	27.0793
EVM0024947	4	purple acid phosphatase 8 [Prunus persica]	1.45809	1.6963	3.02011	10.6845	0.927219	0.68262	0.547414	0.327078	0.0222423	1.65161	0.104149
EVM0024126	4	PREDICTED: putative E3 ubiquitin-protein ligase XBAT31	39.0533	44.6035	57.6991	120.661	26.8358	35.3702	31.2536	39.8797	17.0349	46.4941	35.2473
EVM0003209	4	potassium transporter 5-like	7.55157	19.4486	27.9035	112.519	3.88042	1.87619	2.39327	0.713669	0.018974	40.5102	0.155596
EVM0010271	4	Peptidase_S10 domain-containing protein	8.69568	12.3938	0.597582	32.1725	0.0644677	0.007787	0.169173	0.0649357	11.121	3.92707	0.999175
EVM0014945	4	abietadienol/abietadienal oxidase isoform X2 [Arachis ipaensis]	4.84354	18.6658	5.41369	44.4113	2.66126	1.15855	0.505957	0.292158	0.0221783	11.7457	0.126475
EVM0021105	4	PREDICTED: uncharacterized protein LOC104592187	56.3904	70.6805	57.3782	159.212	12.2337	11.1138	5.53587	4.87609	73.493	46.6502	7.74723
EVM0000120	4	mechanosensitive ion channel protein 10-like	8.23478	7.43606	7.37923	23.7908	3.85069	3.54746	7.30457	5.93248	2.08665	9.38082	4.51487
Liquidambar_formosana_newGene_5417	4	putative disease resistance protein At1g50180	0.971011	1.86202	1.05968	5.1623	0.170825	0.0359047	0.114667	0.132025	0.023371	1.91861	0.171088
EVM0001157	4	PREDICTED: protein LIKE COV 1	3.72951	5.09488	4.59172	9.8665	3.82129	2.55438	2.44261	2.96447	3.97025	3.90177	4.21517
EVM0024691	4	hypothetical protein VITISV_017203	26.5421	21.0317	19.3994	44.5828	13.3337	13.1485	8.56495	7.86374	9.87577	19.3769	17.9159
EVM0018632	4	PREDICTED: uncharacterized protein LOC100242579 isoform X1	3.87003	6.7521	6.71998	22.6507	1.72066	1.01154	0.729542	0.63377	1.41386	7.27823	1.52469
EVM0001217	4	FAD/NAD(P)-binding domain containing protein [Parasponia andersonii]	12.8526	30.401	26.3954	79.346	8.40225	15.1887	3.95684	3.64587	10.0195	18.7524	8.5024
EVM0010921	4	PREDICTED: uncharacterized protein LOC100247891	12.0776	22.1178	18.7442	36.3281	11.6283	10.6737	10.2945	11.2141	8.88349	16.5988	20.3444
EVM0012562	4	PREDICTED: uncharacterized transporter C405.03c	9.60358	8.63052	8.98119	15.06	6.07539	7.66923	6.99521	8.12185	3.48041	9.53435	10.445
EVM0027063	4	hypothetical protein CUMW_142790 [Citrus unshiu]	6.0335	3.58828	4.93147	11.7426	3.73398	3.12089	1.73273	1.45345	0.471694	6.17541	0.410083
Liquidambar_formosana_newGene_1369	4	Function unknown	0.029505	0.277439	0.073618	1.5379	0.349704	0.0371163	0.654807	0.532554	0.0327343	0.653894	0.084546
EVM0003552	4	ACT domain-containing protein ACR1 [Jatropha curcas]	6.19699	8.84737	26.3306	39.3715	9.21644	4.12032	13.0581	21.4818	16.1152	9.67792	0.556638
EVM0023427	4	BAHD acyltransferase BIA1-like [Durio zibethinus]	0	0.0754543	0.259941	1.62143	0.119377	0.0909173	0.0472967	0.081673	0.0175817	0.158925	0.210915
EVM0003475	4	PREDICTED: transcription factor bHLH130 isoform X2	6.84539	6.53163	5.61241	22.04	2.50385	3.54907	3.23826	5.6952	5.70128	3.38385	5.98728
EVM0006620	4	PREDICTED: probable enoyl-CoA hydratase 2, mitochondrial	8.72623	7.71998	4.43807	14.6059	3.95228	3.44773	4.6668	5.9902	4.70732	5.37599	7.26776
EVM0014564	4	PREDICTED: cytochrome P450 76A1	0.295851	0.420955	0.658704	2.61704	0	0	0	0	0	0	0.663877
EVM0023322	4	PREDICTED: LRR receptor-like serine/threonine-protein kinase RPK2	6.6018	4.73806	7.21829	9.809	5.24158	6.04131	7.41855	7.0814	6.43864	5.85293	5.66461
Liquidambar_formosana_newGene_12832	4	Function unknown	28.4424	4.11376	4.64349	92.6947	0.870419	0.339887	0.47711	0.248371	0	2.76344	0
EVM0013831	4	Glutamate receptor 2.9 [Theobroma cacao]	0.254508	0.709155	0.698864	1.91571	0.035348	0	0	0.0270037	0	0.197536	0
Liquidambar_formosana_newGene_7134	4	PREDICTED: disease resistance protein RGA2-like [Daucus carota subsp. sativus]	0.269156	0.589775	0.657822	1.78355	0.832017	0.374727	0.25961	0.223613	0	0.14144	0
EVM0018983	4	UPF0481 protein At3g47200 isoform X1 [Prunus persica]	1.99722	3.73268	1.43015	21.9453	0.103947	0.0787297	0.102206	0.0458853	0	0.156555	0
EVM0003946	4	putative disease resistance RPP13-like protein 1 isoform X1 [Jatropha curcas]	3.2817	2.1245	2.82776	5.04217	1.6926	1.59301	1.7018	2.54628	1.28755	2.39658	2.09783
EVM0015396	4	unnamed protein product, partial	0.622463	6.34354	7.17356	54.2572	0.249723	0	0.325751	0.0549123	0	0.213324	0
EVM0024794	4	PREDICTED: uncharacterized protein LOC104881693	15.7024	18.7096	14.2333	156.392	6.17733	3.93944	2.88845	1.33893	0.215444	9.0477	0.403004
EVM0022748	4	PREDICTED: cytochrome P450 81E8-like	30.9632	33.2287	10.5292	161.33	1.56015	2.64782	1.41562	1.94026	0.855468	15.0363	4.34014
EVM0008911	4	aquaporin NIP2-1-like	20.8284	25.7861	21.4995	90.4532	8.71523	19.7871	11.9319	14.077	0.726618	26.9602	7.12122
EVM0014451	4	PREDICTED: probable E3 ubiquitin-protein ligase BAH1-like 1 isoform X1	23.8195	23.148	21.3866	59.2935	34.1783	25.7518	39.9888	39.8671	21.0469	41.4602	42.4854
EVM0002066	4	hypothetical protein CICLE_v10006964mg	1.63113	1.57392	1.48357	14.6457	0.862025	1.21269	0.725077	0.565767	0.0717323	0.501335	0.466244
EVM0017976	4	PREDICTED: protein EARLY FLOWERING 3	18.8678	20.2123	23.085	35.3623	24.6813	22.7692	24.1678	22.474	26.5879	17.707	25.0085
EVM0013387	4	hypothetical protein EUGRSUZ_H04099 [Eucalyptus grandis]	0.365036	1.90808	1.54912	8.44561	0.287184	0.130714	0.103029	0.0685553	0.00467733	0.445024	0
EVM0004474	4	PREDICTED: 3-ketoacyl-CoA synthase 2	0	3.97505	0.29707	36.2493	1.3304	1.04305	4.01021	6.64065	0	0	3.23891
EVM0006327	4	uncharacterized protein LOC110660911	8.37285	5.73761	19.0812	59.2091	4.11573	0.530772	0.718568	0.927385	0	1.57781	0
EVM0022926	4	PREDICTED: protein AUXIN SIGNALING F-BOX 2-like	7.42619	8.12785	5.58536	10.8056	5.50857	5.46661	5.36638	5.35468	7.58402	5.26806	6.9675
EVM0022895	4	transcription factor MYB251 [Fagus crenata]	2.72316	3.17814	0.019917	14.2004	0.0769683	0	0.144845	0.0977163	0	0.799777	0
EVM0015896	4	PREDICTED: phosphoinositide phosphatase SAC1	15.1347	16.0068	12.3895	20.405	17.5417	13.5411	16.6924	15.4645	17.975	15.5365	14.8945
EVM0017740	4	hypothetical protein CCACVL1_13016 [Corchorus capsularis]	0.791956	1.86791	2.54115	9.13323	0.0920377	0.0974667	0.121231	0.446346	0	0.173214	0.0416287
EVM0028995	4	PREDICTED: probable NAD(P)H dehydrogenase (quinone) FQR1-like 2	2.32415	2.7915	2.15417	5.77943	1.51637	1.73303	1.46393	2.04345	0.949543	2.29541	2.45355
EVM0017584	4	PREDICTED: BEACH domain-containing protein B isoform X1	13.5237	11.379	14.4666	18.9003	14.1446	11.157	12.9114	16.4675	11.889	13.397	16.7007
Liquidambar_formosana_newGene_13320	4	PREDICTED: UPF0481 protein At3g47200-like	0.0530943	0.591435	0.600814	6.28323	0	0	0	0	0	0.019172	0.008813
EVM0007036	4	protein NRT1/ PTR FAMILY 4.6-like isoform X2	4.62588	10.6162	6.77724	34.7412	5.0461	4.50901	3.66948	3.44584	3.38013	6.37321	3.26145
EVM0015817	4	hypothetical protein CISIN_1g044196mg	0	0.714339	0	9.65035	0.0507997	0.0115013	0.0133127	0	0.00890533	0.031366	0.00710733
EVM0011703	4	squamosa promoter-binding-like protein 1	49.9066	46.0421	50.3634	80.4772	50.5244	53.4265	58.3576	64.6704	41.8981	61.3337	66.541
EVM0021626	4	PREDICTED: UPF0496 protein At1g20180-like	0.44905	2.42059	1.73377	10.1837	0.0250543	0.0527997	0.050144	0.01354	0	0.262487	0.0141173
EVM0005390	4	PREDICTED: sister chromatid cohesion 1 protein 4	25.4176	23.8796	27.0436	41.8728	25.9925	21.8651	20.3386	22.5166	24.6476	20.2018	23.2868
EVM0024644	4	PREDICTED: serine/threonine-protein kinase/endoribonuclease IRE1a	11.8877	13.444	16.813	25.3553	11.9397	9.87378	7.19519	8.45707	8.51199	10.6487	12.6304
Liquidambar_formosana_newGene_695	4	Function unknown	2.72234	1.10299	2.45383	5.48179	2.04878	1.19007	1.86391	2.12415	1.77294	0.837671	1.45834
EVM0009041	4	PREDICTED: (R,S)-reticuline 7-O-methyltransferase isoform X1 [Ricinus communis]	0.948204	1.60172	2.74474	12.1285	1.59643	0.954455	1.38959	2.35061	2.43833	0.417048	0.348318
Liquidambar_formosana_newGene_4336	4	Function unknown	0.177737	0.69216	0.476459	1.45846	0.488666	0.780565	0.532828	0.582192	0.76392	0.47627	0.318777
EVM0014370	4	PREDICTED: probable arabinosyltransferase ARAD1	10.8503	9.39994	12.3236	15.4032	12.1563	10.4182	12.2106	11.2033	8.1248	12.0096	10.8174
Liquidambar_formosana_newGene_6278	4	probable disease resistance protein At4g27220	0.126495	2.95181	2.59051	8.74543	1.87426	1.56375	1.49251	4.89064	3.28615	0.63581	2.18383
Liquidambar_formosana_newGene_6174	4	PREDICTED: germin-like protein subfamily 1 member 11 [Pyrus x bretschneideri]	0.189328	0.341024	1.32147	2.55122	0.370638	0.252589	0.0383283	0.215263	0.0276593	0.161328	0.0208577
EVM0012172	4	hypothetical protein MANES_04G015100 [Manihot esculenta]	0.174933	2.04555	0.691618	6.54809	0.439759	0.633116	0.595112	1.15302	0.0146263	1.02434	0.813165
EVM0004993	4	glutamine-dependent NAD(+) synthetase	1.39372	2.65364	2.26316	4.7725	2.44676	2.05192	1.96157	1.83186	1.37026	2.50496	1.79115
EVM0004326	4	unnamed protein product, partial	1.37639	10.0021	10.6498	43.0133	0.405938	0.083545	0.286011	0	0	2.24329	0
EVM0005541	4	uncharacterized protein LOC110662546	11.3195	7.03493	5.77847	16.7052	10.2988	7.17141	8.75502	10.8599	7.76255	7.49646	8.18206
EVM0010284	4	hypothetical protein AMTR_s00077p00166320 [Amborella trichopoda]	0.69394	3.18849	3.58465	15.3891	3.01865	1.09078	1.37458	1.4835	0	1.06192	0.490069
EVM0009888	4	beta-xylosidase/alpha-L-arabinofuranosidase 2-like	8.58531	13.471	10.1833	46.3084	3.64181	9.24787	9.1729	9.97291	0.363003	12.0864	6.17218
EVM0003135	4	hypothetical protein CICLE_v10006964mg	2.67742	3.17794	2.87269	24.3777	2.26583	1.95356	1.16496	0.760812	0.18403	1.1562	0.331432
EVM0005360	4	PREDICTED: cytochrome P450 76A1	18.1453	27.3936	19.4913	116.033	1.9903	0.758274	0.694551	1.33085	0.187361	7.20668	3.51207
EVM0001440	4	PREDICTED: ankyrin repeat-containing protein ITN1	0.084715	0.872764	0.413856	2.28835	0.6397	0.219158	0.236281	0.0889027	0	0.101645	0.0106757
Liquidambar_formosana_newGene_5662	4	PREDICTED: ABC transporter C family member 3-like, partial [Fragaria vesca subsp. vesca]	0	0.214866	0.184961	1.78519	0.281045	0.105633	0.550931	0.622729	0	0.0445	0.0559267
EVM0003412	4	respiratory burst oxidase homolog protein F [Prunus persica]	2.35051	4.77275	6.30074	13.8852	1.68043	0.763491	1.27548	3.79391	0.0870483	3.88057	1.44278
EVM0003359	4	PREDICTED: uncharacterized protein LOC100264117	32.2938	48.0686	36.0204	83.8242	41.3444	33.058	24.5074	18.3889	43.0204	29.4628	27.2596
EVM0008808	4	PREDICTED: zinc finger protein ZAT10	6.06932	3.63481	1.96654	18.2995	0.525209	0.519852	0.273254	0.145367	0.084675	1.09986	0.0300103
EVM0014751	4	polygalacturonase-like	9.23634	4.66148	0.582796	23.0604	0.117405	0.0244393	0.452992	0.267922	0.12146	0.937152	1.17255
EVM0014387	4	F3H9.11 protein isoform 1 [Theobroma cacao]	7.84319	6.61101	6.20057	10.8825	7.24355	8.92046	5.27657	5.71826	7.3339	5.4045	8.77448
Liquidambar_formosana_newGene_743	4	uncharacterized protein LOC109766342 [Aegilops tauschii subsp. tauschii]	1.24697	1.35462	2.94158	11.1247	2.18231	0.525926	0.959317	1.16976	0.0403747	0.635925	0.354697
EVM0020483	4	PREDICTED: cytochrome P450 76A1	23.122	40.6215	31.7336	170.055	3.27731	1.29706	0.919476	1.94131	0.354219	9.69311	5.04398
Liquidambar_formosana_newGene_3115	4	Function unknown	1.1618	4.58983	2.96242	22.6944	0.091518	0.0194917	0.0587683	0.0507343	0.104238	0.126561	0.0810007
EVM0028289	4	hypothetical protein VITISV_007637	0.51283	0.322126	0.612951	1.17977	0.302723	0.249134	0.193054	0.474662	0.355898	0.113352	0.357395
EVM0010941	4	uncharacterized protein LOC110632877 isoform X2	9.22069	13.5214	0.586657	43.6687	0.204641	0.124503	0.669766	0.200787	0.339349	4.4881	1.51474
EVM0004032	4	PREDICTED: protein HOTHEAD	0.0569457	1.37879	0.0816343	3.72731	0.65767	0.30365	0.207368	0.515529	0.020918	0.62975	0.393568
EVM0013231	4	hypothetical protein VITISV_021100	9.77802	15.32	11.9155	20.3642	9.43207	11.2786	10.149	9.68767	13.4655	10.8274	15.5549
EVM0008475	4	unnamed protein product, partial	0.180981	1.19414	0.965315	3.14046	0.381777	0.236523	0.387449	0.551435	0	0.0368117	0.460152
EVM0010164	4	transcription factor MYB8-like	0	1.4531	0.744379	4.29927	0.0399353	0.108343	0	0.0433297	0	0.201006	0.161083
EVM0013595	4	PREDICTED: germin-like protein subfamily T member 1	3.36843	6.25655	16.0771	48.4089	13.2529	14.0512	0.628674	0.23452	0	4.27977	0.0499983
EVM0002276	4	PREDICTED: xyloglucan endotransglucosylase/hydrolase 2-like	1.61276	2.12382	1.52021	10.6986	3.19134	0.59617	6.16687	2.11348	1.30735	1.77655	0.18524
EVM0021290	4	PREDICTED: high mobility group nucleosome-binding domain-containing protein 5-like	0.488763	2.23424	0.659146	6.66327	0.0801363	0.0234077	0.0312503	0.0121163	0	0.0554103	0.104261
EVM0012174	4	PREDICTED: ureide permease 1 isoform X4 [Theobroma cacao]	26.5618	14.4489	18.5529	41.8033	11.6998	28.5092	15.2188	14.9822	15.5441	17.2651	5.57701
Liquidambar_formosana_newGene_8002	4	hypothetical protein VIGAN_05222600 [Vigna angularis var. angularis]	0.420279	0.308352	0.428446	2.05991	0.0626753	0	0.0296047	0.0412253	0.0490837	0.155729	0.0871717
EVM0011004	4	putative disease resistance RPP13-like protein 1 isoform X1	0.211682	0.884384	1.12509	3.57164	0.411998	0.390217	0.1934	0.247235	0.257232	0.166842	0.250285
EVM0002878	4	unnamed protein product [Coffea canephora]	3.50195	10.0399	9.22789	33.7328	0.345875	0.133591	0.110317	0.0686183	0.0323877	2.90967	0.434102
EVM0024104	4	hypothetical protein POPTR_005G112000v3	6.20513	36.5186	17.1804	74.4639	14.8084	13.2195	17.2301	15.5434	3.36988	28.2387	12.4179
EVM0021528	4	PREDICTED: probable inactive patatin-like protein 9 isoform X1	0.534274	4.37119	2.55744	8.40513	1.61431	0.126626	1.45083	2.67214	0.117845	1.50206	4.51621
EVM0027549	4	serine carboxypeptidase-like 18	6.14228	20.6057	3.44654	48.0187	10.8045	8.5003	4.65202	11.2157	2.90999	11.6105	9.71105
EVM0024846	4	PREDICTED: abscisic acid 8&apos;-hydroxylase 4	9.05879	4.06455	0.88803	18.7921	0.500686	0.291397	0.131827	0.0986077	0.0299947	1.13151	0.0911287
EVM0003333	4	probable pectinesterase/pectinesterase inhibitor 17	3.60249	0.146233	2.22256	7.61439	6.4438	1.37773	0.529508	0.784957	0.585655	0.712882	0.067638
Liquidambar_formosana_newGene_7410	4	Function unknown	0.169005	0.376131	0.0972043	2.11072	0	0.0164083	0	0	0	0.072899	0
EVM0020403	4	PREDICTED: uncharacterized protein LOC104594431	0	0.726108	0.38375	3.88198	0	0	0	0.010455	0	0.0111363	0.021501
EVM0002326	4	PREDICTED: equilibrative nucleotide transporter 3 [Eucalyptus grandis]	21.7157	33.5398	31.409	111.037	33.3984	26.1537	12.0338	8.96728	14.356	19.9477	7.99223
EVM0026735	4	PREDICTED: protein LONGIFOLIA 1 isoform X1	1.08282	1.23513	0.925256	5.2776	0.870032	1.37537	0.979264	1.49549	0.0533047	0.397671	1.37427
Liquidambar_formosana_newGene_8801	4	Function unknown	0.46366	1.44167	1.4957	4.02976	0.952085	1.5025	1.04175	2.33314	0.247772	1.16172	2.12936
EVM0005399	4	carboxylesterase 1-like	3.11984	4.8394	1.17112	19.5023	1.6306	0.49957	0.366165	0.207575	0.0957883	0.800984	0.037764
EVM0026225	4	xyloglucan endotransglucosylase/hydrolase 2-like [Herrania umbratica]	66.9968	48.5135	30.5524	189.168	10.0591	5.24205	24.034	14.2107	4.19994	23.8382	1.98517
EVM0020552	4	PREDICTED: xyloglucan endotransglucosylase/hydrolase 2-like	12.695	4.4955	6.16714	22.2844	5.06925	1.711	7.59406	0.930098	0.370205	4.80349	0.83539
EVM0016645	4	PREDICTED: protein LONGIFOLIA 1 isoform X1	3.43195	3.39683	5.55441	16.3254	2.87157	2.83957	3.11672	3.34128	0.493404	1.23453	2.51065
EVM0002686	4	PREDICTED: transcription factor bHLH118	0.215732	2.1588	1.26022	5.49299	1.13287	0.797252	0.619999	0.253566	0	0.338391	0
EVM0011823	4	UDP-glycosyltransferase 13-like	1.97582	7.74144	2.86711	25.2999	0.756857	0.236315	0.508274	0.18298	0	0.562589	0.0227153
EVM0019363	4	PREDICTED: cation/calcium exchanger 2-like	7.31778	5.96974	6.06873	12.2775	6.88704	6.77586	4.29293	5.25926	2.29331	7.22951	5.0412
Liquidambar_formosana_newGene_11571	4	PREDICTED: uncharacterized protein LOC103328135 [Prunus mume]	0.019527	1.24125	0.319632	3.3796	0.30786	0.261761	0.493416	0.190552	0.162243	0.199052	0.345625
EVM0021028	4	PREDICTED: probable LRR receptor-like serine/threonine-protein kinase At1g53440 isoform X1	33.1857	19.2497	28.1256	51.9993	32.5828	23.443	19.7177	26.2906	16.5318	14.8455	23.6737
EVM0010859	4	DUF3049 domain-containing protein	1.30649	1.23633	1.58238	5.47047	1.82628	0.477661	1.73345	1.70698	0	0.21078	0.0635473
EVM0024435	4	PREDICTED: serine/threonine receptor-like kinase NFP	3.29845	2.62062	1.25324	7.61675	2.40377	2.58359	2.43941	1.52114	0.43527	3.34119	0.141334
EVM0020391	4	uncharacterized protein LOC18778160 isoform X1 [Prunus persica]	0.411695	0.644021	0.819185	1.61456	0.30371	0.508455	0.256285	0.201654	0.331384	0.395091	0.280205
Liquidambar_formosana_newGene_6275	4	Function unknown	0.567057	0.93856	0.513621	2.43521	0	0	0.0599453	0.081836	0	0.11905	0.049837
EVM0006606	4	PREDICTED: uncharacterized protein LOC100254107 isoform X1	5.09652	18.2547	18.8568	33.5537	26.1034	21.7394	13.0091	9.57968	16.6403	21.7353	7.71797
Liquidambar_formosana_newGene_8652	4	Function unknown	1.63799	0.680926	1.98016	3.85732	2.52221	0.963945	1.035	0.634349	0.750328	0.038252	0.477405
EVM0027750	4	PREDICTED: disease resistance protein RGA2	1.52329	2.78013	3.45686	8.0984	1.88101	0.904053	0.485236	0.321514	0.146484	2.20705	0.0846347
Liquidambar_formosana_newGene_3081	4	hypothetical protein VITISV_022262	2.47578	2.81798	1.26635	5.88816	2.29348	1.84771	1.83753	1.82157	1.99196	1.1066	1.72569
EVM0015109	4	PREDICTED: protein NETWORKED 2D [Theobroma cacao]	1.08234	0.771109	0.872723	3.22999	0.215079	0.179216	0.070707	0.140497	0.0188437	0.166151	0.078508
EVM0027550	4	topless-related protein 3 [Sesamum indicum]	28.5146	22.1313	18.0938	40.451	16.5429	17.1897	17.3602	22.0237	18.7398	15.8604	16.1816
EVM0013937	4	PREDICTED: G-type lectin S-receptor-like serine/threonine-protein kinase At5g35370	5.77584	5.29414	5.35241	10.646	4.99814	6.1641	2.79453	2.58774	2.01561	6.53094	2.01107
EVM0020835	4	PREDICTED: peroxidase 16	54.1904	31.0854	11.2054	121.912	0.16757	0.094244	0.0838833	0.0367433	0	2.00856	0.03079
EVM0009793	4	U box domain [Macleaya cordata]	0.418074	0.887038	0.776126	3.24467	1.15633	0.965822	0.679605	0.835749	0.188732	0.24681	0.216715
EVM0009315	4	DUF260 domain-containing protein, partial	19.9535	27.0299	12.5658	90.8046	1.65487	1.02847	1.62501	0.749637	0	2.74495	0
EVM0027185	4	PREDICTED: serine carboxypeptidase-like 13	3.71836	5.28477	1.9473	10.1501	1.97465	3.80373	1.30906	3.20697	0.0179537	4.27833	3.90148
EVM0011748	4	PREDICTED: serine/threonine-protein kinase CDL1-like	23.8953	16.8355	18.9409	51.8896	3.44824	2.73968	1.4089	2.70496	2.5095	11.5678	1.36187
EVM0005988	4	PREDICTED: putative disease resistance protein At1g50180	2.07176	4.73638	1.24433	9.17411	0.36961	0.157028	0.567219	0.412744	0.928632	2.86195	0.407604
Liquidambar_formosana_newGene_8653	4	Function unknown	0.840416	0.357213	0.919157	1.76378	1.03318	0.467174	0.367021	0.310086	0.330097	0.0135433	0.297125
Liquidambar_formosana_newGene_10079	4	Zinc finger, CCCH-type [Corchorus capsularis]	1.19144	1.2488	1.01505	4.94104	0.175937	0.192339	0.0618357	0.033709	0.0138133	0.043522	0.00628833
EVM0009206	4	PREDICTED: uncharacterized protein LOC100266416	0.751719	1.78383	2.66489	5.73162	1.87959	0.427774	0.394556	0.165017	0.452614	0.769072	0.130703
EVM0003124	4	Cation-transporting P-type ATPase [Corchorus capsularis]	23.8331	22.4663	21.1229	35.0964	25.7211	22.4724	22.1948	21.2798	18.5003	16.7759	23.9499
EVM0000043	4	PREDICTED: mechanosensitive ion channel protein 10-like [Pyrus x bretschneideri]	24.9134	34.1889	18.9072	75.19	17.7593	21.2854	27.2519	25.0863	3.22996	28.1769	17.3364
EVM0012173	4	PREDICTED: putative laccase-9	2.83831	4.45393	1.65038	9.99875	1.49179	2.01285	0.349644	1.00341	0.643769	2.50294	1.47218
EVM0009067	4	patellin-3-like	269.069	208.116	132.481	497.54	64.8666	59.3339	94.8945	108.099	56.4611	155.979	50.393
EVM0028412	4	PREDICTED: probable glucuronoxylan glucuronosyltransferase IRX7 isoform X1	33.2629	38.1153	30.5333	88.8844	53.0004	40.8204	37.4089	39.1109	12.1282	43.103	21.7551
EVM0013992	4	uncharacterized protein LOC112024259	36.91	32.2749	4.43974	83.1438	0.843913	0.668491	0.805109	0.577286	0.490377	15.7139	1.89648
EVM0005234	4	transcriptional activator DEMETER-like	0.769037	1.31667	1.08134	3.65587	0.844521	0.477028	0.294546	1.48616	0.275914	0.394214	0.526399
EVM0003885	4	mitogen-activated protein kinase kinase kinase 18-like	1.54363	1.21773	1.1573	4.30479	0.344616	0.261718	0.14402	0.144856	0.0974437	0.240182	0.296474
Liquidambar_formosana_newGene_13074	4	Function unknown	0.109143	0.630161	0.0490073	1.61365	0.102921	0.339962	0.450664	0.476902	0.0295763	0.056051	0.282914
EVM0028428	4	Function unknown	1.99763	6.19647	1.38676	15.2782	0	0	0	0	0	0	0
EVM0000489	4	transcription factor APETALA2	14.3656	23.8841	14.4349	39.4795	16.3041	14.2486	16.8793	14.1306	9.4965	17.5637	16.4592
EVM0013977	4	UDP-glycosyltransferase 85A2-like	12.6108	64.4983	40.8605	152.339	46.7906	41.1249	11.3648	4.51126	0.066069	48.2588	0.132015
EVM0006748	4	PREDICTED: regulatory-associated protein of TOR 1	29.5473	31.4387	37.2329	51.9049	28.4685	28.0114	29.2263	28.8808	17.7897	33.509	24.2755
EVM0009599	4	superoxide dismutase [Cu-Zn]-like isoform X1 [Ananas comosus]	21.2564	22.5006	17.5672	36.7688	14.6692	14.5025	10.3534	8.49404	9.33194	20.8384	14.9898
EVM0010379	4	Drug/metabolite transporter [Corchorus capsularis]	35.4453	37.595	25.0828	70.8944	16.9051	19.9917	15.3532	17.4204	21.0188	23.2554	18.5895
EVM0024922	4	PREDICTED: CASP-like protein 1D1 [Ricinus communis]	433.439	430.498	390.347	1291.93	54.226	25.3901	16.38	10.9825	39.9637	190.438	13.53
EVM0000655	4	BAHD acyltransferase BIA1-like [Durio zibethinus]	24.6783	62.9753	58.5738	211.111	4.22189	2.17094	1.53155	0.920451	0	3.56262	0.176988
EVM0019530	4	PREDICTED: uncharacterized protein LOC100244942 isoform X1	25.7951	20.1808	23.9125	68.4403	0.946449	1.61195	0.929324	1.22579	2.72172	6.65115	1.91375
EVM0007430	4	GDSL esterase/lipase At5g22810 isoform X1 [Jatropha curcas]	21.6645	33.4576	28.2292	71.7883	12.3117	5.15106	5.30943	8.02373	0.354824	28.5361	10.2337
EVM0006572	4	PREDICTED: NAC domain-containing protein 73 isoform X2	20.9809	19.9437	28.6185	51.5752	7.12114	5.3917	4.06558	4.82336	10.3077	9.43387	8.44503
EVM0028157	4	PREDICTED: RING-H2 finger protein ATL46	4.31417	7.74662	4.42003	14.4191	1.61716	1.09153	1.46955	1.57688	0.9565	6.12145	2.45653
EVM0002151	4	PREDICTED: disease resistance protein RPM1 isoform X1	0.377985	0.342084	0.375254	0.834488	0.274113	0.285247	0.164038	0.349192	0.164589	0.176791	0.222187
Liquidambar_formosana_newGene_4903	4	Function unknown	4.3755	4.08663	5.95007	10.8298	3.34365	2.65571	2.32833	3.24158	1.98652	2.75436	1.4917
EVM0023060	4	hypothetical protein VITISV_003752	0.487536	0.641597	1.14405	2.42414	0.415558	0.252438	0.437147	0.433282	0.0100707	0.119651	0.219141
Liquidambar_formosana_newGene_6863	4	Function unknown	0.373588	0.283634	0.470013	0.908152	0.207266	0.382655	0.27159	0.365517	0.069724	0.189563	0.144053
EVM0000717	4	myosin-6-like isoform X1	4.48552	4.90713	6.38375	9.54135	3.94266	4.08277	3.88143	4.53714	3.48767	2.82659	4.70839
EVM0017117	4	putative disease resistance protein At1g50180 [Herrania umbratica]	2.32237	4.04492	2.85756	8.50537	1.51748	0.846347	1.61734	2.65254	1.1866	2.06295	1.77394
EVM0009842	4	glutamate receptor 2.9-like [Herrania umbratica]	0.513839	0.230448	1.13044	3.16691	1.48819	1.55282	0.436124	0.547426	0.023591	0.145139	0.0347837
EVM0010568	4	Function unknown	10.1564	42.8589	55.9227	143.464	2.87044	3.43847	1.31125	0.198941	0.0254187	3.77416	0
EVM0016375	4	PREDICTED: probable NAD(P)H dehydrogenase (quinone) FQR1-like 2	4.14423	4.94792	4.13097	7.78146	3.75941	3.61782	4.37257	5.14698	3.64472	3.40427	3.76583
EVM0022391	4	PREDICTED: serine/threonine-protein kinase EDR1 isoform X4	37.2458	36.9783	29.0217	56.8618	29.0551	29.397	23.6005	29.3306	25.3612	30.7824	23.3734
EVM0014874	4	hypothetical protein POPTR_018G039600v3	12.7268	19.4562	9.38453	55.692	1.62358	0.920607	0.944387	1.69805	0.223905	3.12388	2.05192
EVM0006107	4	dCTP pyrophosphatase 1-like [Olea europaea var. sylvestris]	140.178	162.204	165.234	364.945	118.881	131.156	132.335	131.8	4.86551	181.403	28.8657
Liquidambar_formosana_newGene_4127	4	putative AP endonuclease/reverse transcriptase [Brassica napus]	3.19844	3.04353	2.59871	8.47747	1.0258	1.09631	1.47443	1.98026	0.439173	1.0056	1.32328
EVM0005901	4	hypothetical protein CICLE_v10003142mg	13.4546	14.5673	11.6354	23.7455	11.8747	10.1709	9.26977	9.89518	7.77027	10.9601	11.454
EVM0022285	4	DUF4283 domain-containing protein/zf-CCHC_4 domain-containing protein, partial	1.21657	1.75284	2.81635	6.3337	0.951891	1.19376	0.329733	0.962898	0.312102	0.0236387	0.386929
EVM0017855	4	bahd acyltransferase dcr	0.402343	38.6572	14.2688	103.369	19.0196	12.3407	14.7501	13.5146	0.723156	0	8.22004
EVM0018301	4	probable beta-1,4-xylosyltransferase IRX10L	50.2729	52.0797	56.9618	84.4429	32.6379	35.898	33.2497	35.0173	30.7494	47.831	35.5607
EVM0004619	4	calcium-transporting ATPase 1, endoplasmic reticulum-type-like [Durio zibethinus]	38.3024	26.8568	32.322	52.7178	33.6673	30.7937	32.6444	34.3885	21.2029	26.8056	27.5844
EVM0017639	4	PREDICTED: transcription repressor OFP14 [Theobroma cacao]	7.79515	5.63969	10.452	21.4066	5.71963	2.31959	0.93473	0.948895	0.0202283	0.862181	0.0177117
EVM0025229	4	sodium/calcium exchanger NCL-like	3.24025	6.20378	6.19605	16.7853	1.06311	1.49155	1.24734	1.72656	0.0667867	3.07649	0.381478
Liquidambar_formosana_newGene_2613	4	PREDICTED: uncharacterized protein LOC104446483 [Eucalyptus grandis]	1.79099	2.95892	2.09395	8.17804	0.903022	0.850372	0.674328	0.955711	0.209362	0.327449	0.984357
Liquidambar_formosana_newGene_12829	4	Function unknown	180.546	183.78	167.885	551.6	21.7934	12.3498	4.51194	5.38364	0.160853	39.94	0.269667
EVM0005530	4	PREDICTED: peroxidase 21	4.25338	12.2311	5.06861	32.0887	1.30069	1.30556	1.07643	1.10514	0.33778	1.18641	2.62103
EVM0010013	4	PREDICTED: sugar transporter ERD6-like 5 isoform X2	0.269878	0.370133	0.39221	0.904068	0.215479	0.0751633	0.0680837	0.159456	0.0998523	0.167285	0.110892
EVM0027849	4	PREDICTED: putative multidrug resistance protein	0.393866	0.45239	0.379826	0.872678	0.305208	0.279375	0.212055	0.163806	0.0781773	0.410821	0.187972
Liquidambar_formosana_newGene_82	4	Uncharacterized protein TCM_037494 [Theobroma cacao]	1.42366	2.20816	1.79684	6.58799	1.21111	0.454945	0.404448	0.318098	0.0482073	0.130968	0.330025
EVM0023359	4	hypothetical protein VITISV_038835	2.38967	2.64375	0.862636	5.31707	0.756071	0.305559	0.282329	0.947223	0.514393	0.889996	1.72445
EVM0029418	4	lipoxygenase 1	21.3127	41.5394	20.5602	98.7838	1.94753	0.753831	0.420373	0.594867	0.451296	17.6606	1.72893
EVM0014885	4	PREDICTED: proline-rich receptor-like protein kinase PERK13	1.3035	1.93036	2.9305	6.5974	0.906297	1.51299	1.34326	2.25633	0.129915	0.250547	0.122113
EVM0002291	4	PREDICTED: pathogenesis-related protein 1C [Eucalyptus grandis]	2.36456	2.03687	0.887312	4.96777	1.24928	0.266486	0.42168	0.278402	0.193967	0.62799	0.500337
EVM0024523	4	G-type lectin S-receptor-like serine/threonine-protein kinase SD2-5 [Herrania umbratica]	1.42756	1.59917	1.95633	4.1906	0.14358	0.161376	0	0.0933177	0.023093	0	0.0499597
[truncated: 4,816 more rows]

## Sheet: Fig4B. 142 TF 
ID	cluster	Supercluster	TF family	NEC	EC	PEM1	PEM2	GE	HE	TE	CE	L	R	S
EVM0028903	14	1	AGC_RSK-2	27.6698	5.14103	3.10272	3.43778	4.736	6.10614	5.0256	6.46223	6.17274	5.37556	14.0862
EVM0010377	14	1	AP2/ERF-ERF	63.0502	2.48956	3.00953	0.69906	0.392442	0.150643	3.66091	1.16013	0.376706	2.15615	1.5652
EVM0009101	14	1	AUX/IAA	206.886	4.95975	5.14655	0.814917	2.56046	3.79335	8.20003	14.8276	4.7103	0.473655	1.37615
EVM0012353	14	1	bHLH	75.0667	3.54818	3.28066	2.47986	6.43902	12.4785	11.6516	15.6106	3.60832	7.99918	12.4399
EVM0012125	14	1	bZIP	2.60411	0.0525287	1.09817	0.0615187	0.926382	0.739927	1.1481	0.310599	0.055639	0.261728	0.44915
EVM0023968	14	1	C2C2-Dof	50.3078	0.0582173	0.586915	0.0620667	0.614144	0.708606	0.875882	1.57673	1.64018	1.1258	4.4603
EVM0011745	14	1	C2C2-GATA	6.44014	2.55512	0.500912	1.78469	1.12904	1.97891	1.14063	0.530566	0	0.223403	0.779097
EVM0020132	14	1	C2H2	20.3421	2.50885	2.69521	5.87635	2.84232	2.50224	1.37705	0.443788	1.07555	1.09471	5.23713
EVM0001284	14	1	CAMK_CDPK	23.9719	0.969582	5.9347	4.88639	1.29683	0.675172	0.615749	0.889114	0.084285	3.96683	4.30406
EVM0017058	14	1	GNAT	129.558	10.2281	19.4024	2.73078	0.849537	1.10302	1.59792	1.64482	0.423551	4.28963	3.81405
EVM0003099	14	1	GRAS	33.5078	9.41489	13.0204	18.0253	3.95979	5.16778	6.33725	9.278	1.19578	9.56142	11.1519
EVM0026048	14	1	HB-HD-ZIP	82.0705	5.77072	12.4695	3.47175	18.2601	16.4813	18.7705	12.6374	0.188957	3.31517	1.82935
EVM0014697	14	1	HB-KNOX	109.961	26.8985	40.5939	36.0782	14.5235	18.8182	24.2048	24.7537	51.9095	38.8124	40.1714
EVM0003362	14	1	HB-WOX	73.8704	24.1978	22.8407	22.7616	6.74804	12.606	9.6904	7.50036	4.15681	7.05536	16.7645
EVM0020589	14	1	LOB	64.4749	2.82299	4.24073	6.4285	0.0251803	0.144501	0.0504267	0.300185	0.102576	2.05772	9.96317
EVM0005046	14	1	MYB	15.8947	1.00155	2.02398	1.76081	2.7236	2.94666	8.18612	7.37629	8.29894	2.17465	1.63562
EVM0014750	14	1	MYB-related	22.3804	0.110151	0.535814	0.193402	0.207148	0.141872	0	0.153016	1.61126	5.63051	3.40883
EVM0007410	14	1	NAC	26.7559	0.420004	2.77865	0.093413	0.493434	0.64195	0.827098	0.716641	1.85069	1.95896	3.22854
EVM0025588	14	1	OFP	22.5108	4.37157	7.59577	8.65047	0.499598	0.399556	0.357802	0.22826	0.541738	1.62305	3.62243
EVM0008260	14	1	PHD	10.3099	4.29231	4.46403	2.54669	1.53728	1.49155	0.72659	0.632193	0.0422503	0.375214	1.06247
EVM0013908	14	1	PLATZ	5.58001	1.52997	0.604473	0.878183	0.574539	0.555554	0.590671	0.121588	0.0180157	0.373472	0.495412
EVM0010378	14	1	RLK-Pelle_CrRLK1L-1	4.79593	1.30207	1.03908	1.80418	0.0553207	0.0588817	0.122367	0.106556	0.309846	0.469672	0.393279
EVM0025108	14	1	RLK-Pelle_DLSV	5.64221	1.74779	3.04636	3.1211	1.86018	1.92008	1.70356	2.30932	1.91398	2.27329	2.09685
EVM0001906	14	1	RLK-Pelle_L-LEC	10.3021	2.24576	1.39953	4.30962	0.480685	0.303413	0.219973	0.234693	0.014859	1.3085	0.057858
EVM0015441	14	1	RLK-Pelle_LRR-XI-1	18.6657	1.5756	0.384054	2.58303	0.0412773	0.0661323	0.231389	0.447964	1.05404	4.17429	1.57524
EVM0013296	14	1	RLK-Pelle_PERK-2	2.55486	0.302328	1.08735	0.311601	1.22312	0.782427	0.355071	0.252266	0.622454	0.204171	0.538035
EVM0003227	14	1	RLK-Pelle_RLCK-IXb	3.75431	0.5464	1.04162	0.63028	0.689502	0.637571	0.333568	0.707474	0.139855	1.90463	0.955938
EVM0009429	14	1	RLK-Pelle_RLCK-VIIa-1	99.0638	39.0725	21.8574	32.431	16.0034	15.822	17.307	21.7605	7.27048	31.1963	37.3692
EVM0026847	14	1	RLK-Pelle_RLCK-XII-1	9.66018	3.89179	2.16139	2.95223	2.79418	3.50366	4.06485	4.41221	4.57726	3.61616	5.18103
EVM0009492	14	1	RLK-Pelle_SD-2b	9.62792	1.81012	2.74979	2.6819	1.1119	1.28848	1.09125	1.3053	0.848733	3.34279	1.14839
EVM0001654	14	1	RWP-RK	29.3811	10.601	13.7813	17.2911	8.91633	10.8234	14.2329	16.0152	4.31231	10.9428	10.0899
EVM0010025	14	1	SRS	46.0242	11.0696	13.5668	13.1394	3.97512	2.94656	5.97605	1.37375	0	2.25013	0.96795
EVM0009821	14	1	TKL-Pl-4	8.1995	2.50218	0.871106	3.69383	2.11106	1.33013	1.70068	3.9822	1.83449	2.05375	3.6569
EVM0007706	14	1	TKL-Pl-7	36.7937	11.9407	8.39974	11.1886	8.20077	8.94623	10.0205	12.1926	0.894213	5.28962	9.51193
EVM0018661	14	1	Trihelix	43.268	0.252503	0.267241	0.105503	0.210909	0.404401	0.662896	1.30904	1.03471	1.68856	9.32392
EVM0005341	14	1	WRKY	3.60267	0.394521	0.472485	0.050928	0.086629	0.134302	0.123291	0.250764	0.124367	1.88785	0.088696
EVM0018649	2	1	C3H	92.7524	55.3664	53.9073	44.2628	63.3278	78.8928	78.9542	66.7516	28.2104	42.9634	43.8228
EVM0000707	2	1	DBB	13.5192	7.74589	8.07881	7.14034	6.62433	9.15435	9.4049	7.16069	4.09066	4.24171	3.73271
EVM0024424	2	1	HB-other	43.3855	12.1134	22.4692	24.1708	30.0924	10.7545	10.564	6.0111	0.365107	3.00374	7.27283
EVM0022707	2	1	Pseudo ARR-B	19.5288	4.02529	9.40835	3.85157	15.057	4.84124	6.12468	6.38521	4.46094	2.85649	3.76706
EVM0027821	2	1	RLK-Pelle_LRR-I-2	31.934	19.0011	20.3053	21.1419	24.5168	19.1365	20.7885	15.3782	8.0271	26.9414	14.5844
EVM0005870	2	1	RLK-Pelle_LysM	31.8307	20.5154	12.6928	11.1715	19.4878	19.6599	26.4071	18.6944	2.66259	2.92523	4.29256
EVM0009250	2	1	WEE	8.5087	4.3613	2.87068	2.07121	3.08094	3.51985	2.85349	1.98494	0.0655507	0.422023	1.99385
EVM0016469	23	2	Alfin-like	17.1752	26.9086	17.8339	21.6369	16.0013	15.2774	23.1829	15.7461	16.6921	18.9655	17.8826
EVM0013106	23	2	AP2/ERF-AP2	32.4361	204.586	106.864	90.6374	71.4421	63.196	67.0972	38.0659	0.05051	1.83248	0.255299
EVM0020844	23	2	C2C2-YABBY	0.0871923	20.2948	7.57754	4.72506	2.3848	6.76671	5.3265	10.9758	2.58582	0	12.0008
EVM0020291	23	2	E2F-DP	8.90975	21.4129	12.182	13.9989	10.5706	9.08853	7.54205	10.0172	0.878906	1.60557	2.52181
EVM0009470	23	2	FAR1	6.46303	9.66091	5.66837	8.33516	7.01822	8.20196	6.84666	6.05741	5.04398	5.58301	6.23801
EVM0001631	23	2	GARP-G2-like	1.33275	5.4634	0.23089	0.031339	3.15634	1.2911	3.73448	2.20887	0.0354857	0.314503	0
EVM0008773	23	2	RLK-Pelle_LRR-VIII-1	0.145874	10.5749	0.721823	0.2625	0.0135657	0	0.0149837	0.0180987	0.047458	3.73156	0.0266197
EVM0017414	23	2	RLK-Pelle_LRR-XIIIb	1.74826	15.0173	2.83833	4.00468	4.6481	8.38707	3.77469	6.53881	0.250662	0.16456	6.79557
EVM0007882	23	2	RLK-Pelle_RLCK-VI	15.4457	44.9001	21.8997	25.1926	7.99098	12.0323	9.07679	4.854	7.00052	6.6187	2.77264
EVM0019534	23	2	RLK-Pelle_WAK	7.00065	25.0106	13.9781	16.9982	8.74315	7.85221	9.88213	7.09848	2.64287	6.792	1.14748
EVM0016192	23	2	TUB	7.28961	35.3488	19.3861	18.1309	8.79625	7.86669	4.34583	3.02242	0.313679	0.952663	1.69355
EVM0015373	20	3	AGC_MAST	2.27977	1.55413	5.40267	2.68692	1.58012	0.804747	0.574353	0.628712	1.41759	1.84136	2.19922
EVM0018167	20	3	CMGC_CLK	48.88	34.6004	81.7708	50.4932	38.1995	36.2925	42.6346	33.5448	12.2292	25.0223	23.0724
EVM0012724	20	3	CPP	3.26136	2.00367	5.92044	2.40929	2.69191	2.42145	1.8932	2.22635	0.352954	0.973765	1.43095
EVM0002141	20	3	DDT	10.2162	12.359	24.5058	15.6536	12.4592	13.0051	10.4303	11.3044	12.7625	14.3709	8.53525
EVM0013100	20	3	mTERF	6.67554	5.84811	14.564	9.73552	6.65026	4.99132	4.35803	4.47082	4.5739	5.72397	7.58534
EVM0024627	20	3	NF-X1	19.9403	28.6589	114.478	29.581	37.2491	32.9965	23.3617	23.2784	17.905	12.9557	10.5593
EVM0005276	20	3	NF-YC	10.0523	6.26144	22.3396	4.64096	2.07949	2.34634	1.59919	1.28508	0.213041	2.2855	1.73513
EVM0000108	20	3	RLK-Pelle_LRK10L-2	1.17418	1.59256	2.82066	1.57049	1.55985	1.62097	1.27931	1.59394	1.94199	1.03145	1.7091
EVM0007523	20	3	RLK-Pelle_LRR-II	1.5157	7.06798	23.902	5.74774	0.898546	0.805021	0.361334	0.698231	0.27159	0.136515	0.0557143
EVM0025688	20	3	RLK-Pelle_LRR-Xa	0.309511	10.9541	84.2187	7.00919	4.59974	5.73731	2.1953	2.27823	12.3726	14.979	18.0567
EVM0000037	20	3	RLK-Pelle_LRR-Xb-1	2.53369	1.90245	9.32116	4.41729	0.816645	0.791104	0.402135	0.411374	0.264552	2.91711	1.18741
EVM0009974	20	3	RLK-Pelle_LRR-XII-1	0.639523	26.7914	86.3823	16.1014	2.10845	1.62544	1.16439	1.36077	0.067657	0.388825	0.174645
EVM0002077	20	3	SET	13.47	14.944	31.0295	14.0545	14.0841	13.9094	9.53021	10.9186	4.26244	15.9433	10.0315
EVM0021355	20	3	SNF2	2.15335	2.30745	3.7616	1.65384	2.02613	1.45827	1.41678	1.65465	1.64044	0.795714	0.621903
EVM0006539	20	3	STE_STE11	0.47713	0.444277	2.46857	0.8314	1.06602	0.581468	1.04352	0.793668	0.547411	0.643333	0.328902
EVM0017237	20	3	TCP	11.1146	16.4577	43.9862	13.2743	13.7156	12.9824	9.83442	12.6558	7.79711	15.0325	3.91803
EVM0013447	20	3	TKL-Pl-3	3.41433	3.16759	6.46431	3.3367	3.36204	3.8223	2.76796	4.19551	3.24607	2.88195	3.36193
EVM0007867	20	3	TRAF	42.2087	36.8314	63.6772	50.2599	42.8781	40.8223	46.7431	40.3166	44.4239	45.989	35.337
EVM0025225	26	4	B3-ARF	6.8363	13.4243	7.07248	23.495	5.94061	6.28826	4.44538	4.67924	5.93758	6.62054	6.39132
EVM0014757	26	4	CAMK_CAMKL-CHK1	11.8961	16.9018	28.6762	42.8399	11.0899	10.1716	7.2292	6.889	12.5084	20.6537	17.7267
EVM0022215	26	4	CMGC_CDKL-Cr	6.03453	7.53499	7.39715	10.9891	5.01006	5.69371	3.63494	4.64737	4.74938	4.39641	5.61072
EVM0024644	26	4	IRE1	11.8877	13.444	16.813	25.3553	11.9397	9.87378	7.19519	8.45707	8.51199	10.6487	12.6304
EVM0015397	26	4	Jumonji	8.32828	13.315	11.7381	20.3193	14.9562	10.8118	11.057	12.366	13.493	15.3703	15.8014
EVM0018281	26	4	MADS-MIKC	0	0.264296	0.440651	1.76948	0.487543	0.039983	0.669708	0.279162	0	0.915492	0.2789
EVM0012459	26	4	NF-YA	3.93606	74.1989	45.0323	158.277	56.9648	51.1119	34.2612	36.0698	4.06016	71.5173	55.4147
EVM0011748	26	4	RLK-Pelle_Extensin	23.8953	16.8355	18.9409	51.8896	3.44824	2.73968	1.4089	2.70496	2.5095	11.5678	1.36187
EVM0029069	26	4	RLK-Pelle_LRR-III	5.00379	4.4111	5.92022	10.3896	2.4888	3.55756	1.5251	2.15532	2.14259	4.02372	6.63462
EVM0007682	26	4	RLK-Pelle_LRR-IX	34.4069	33.5161	29.6781	81.1673	19.6946	18.4503	21.9485	26.457	12.5834	40.2797	26.3019
EVM0023322	26	4	RLK-Pelle_LRR-XV	6.6018	4.73806	7.21829	9.809	5.24158	6.04131	7.41855	7.0814	6.43864	5.85293	5.66461
EVM0028348	26	4	RLK-Pelle_PERK-1	14.4732	16.1298	22.9841	39.6511	14.9558	13.2516	9.86068	8.78387	6.94992	20.1815	14.2855
EVM0000474	26	4	RLK-Pelle_RLCK-VIIa-2	36.1506	36.9048	33.2875	99.5594	14.5796	8.82538	10.9859	15.919	53.0777	41.6877	46.9085
EVM0011703	26	4	SBP	49.9066	46.0421	50.3634	80.4772	50.5244	53.4265	58.3576	64.6704	41.8981	61.3337	66.541
EVM0022391	26	4	TKL_CTR1-DRK-2	37.2458	36.9783	29.0217	56.8618	29.0551	29.397	23.6005	29.3306	25.3612	30.7824	23.3734
EVM0009114	19	5	RLK-Pelle_DLSV	9.21634	50.5008	77.8553	31.3992	233.567	114.241	80.1594	82.6083	5.24453	9.66409	11.8864
EVM0010157	19	5	RLK-Pelle_WAK_LRK10L-1	98.1946	108.004	82.3215	82.5021	195.327	97.3822	88.9781	90.1907	2.03671	8.44479	3.72909
EVM0023537	19	5	AP2/ERF-ERF	5.44551	46.048	54.1845	17.5895	169.083	83.1305	46.9216	26.1096	84.3812	19.9259	71.7125
EVM0002557	19	5	Jumonji	31.2532	37.0309	17.9845	18.7043	92.9047	32.9452	50.0501	52.3328	1.71022	9.56829	4.04502
EVM0009639	19	5	AP2/ERF-ERF	0.158881	0.748611	47.1421	2.06666	83.0987	44.8907	11.5954	9.22928	41.3103	20.1415	50.9581
EVM0022621	19	5	RLK-Pelle_DLSV	16.1867	25.5108	51.0237	17.3059	80.6379	36.3147	27.8096	21.076	0.957875	20.0345	2.18322
EVM0001413	19	5	RLK-Pelle_SD-2b	4.52456	9.82689	8.50584	4.98646	21.5783	12.0878	7.74876	7.04213	1.09994	1.26986	1.85462
EVM0022815	17	6	HB-BELL	8.73825	9.48896	5.4569	7.49026	5.59051	15.18	9.57577	10.0011	9.24571	0.658441	8.96077
EVM0009361	34	7	bHLH	13.5231	18.0767	18.0948	17.1208	23.242	24.4597	33.1222	26.0771	14.4609	22.7574	22.4194
EVM0026990	35	8	zf-HD	1.55943	0.56522	1.89372	0.192937	2.55752	4.87049	8.53597	13.9072	3.86171	1.19523	7.51689
EVM0011252	35	8	MADS-M-type	0	1.23774	1.04204	0.665492	0.242309	0.331177	1.97086	4.28468	0	0	0
EVM0025528	35	8	GRF	2.36094	5.58047	7.62968	8.24758	18.4151	41.2984	45.621	70.0327	1.03631	2.44135	10.0639
EVM0023262	35	8	CMGC_CDK-PITSLRE	99.9078	94.7128	80.7433	103.101	116.913	93.2801	132.767	170.599	72.6603	59.0949	71.4226
EVM0020929	35	8	B3	0.27142	0.042759	0.228223	0.101797	0.284594	0.921321	1.51004	5.6171	0.462422	0.309013	1.0617
EVM0004412	5	9	C2C2-CO-like	27.5467	6.76754	57.5129	25.0899	38.1714	51.586	54.4301	65.7557	250.191	135.744	90.1142
EVM0024073	5	9	Group-Pl-4	1.71018	1.99815	1.04759	1.4194	1.05926	1.18203	1.58789	1.37614	61.2452	4.28104	10.5607
EVM0002162	5	9	HSF	0.182859	0.141853	0.243657	0.144971	0.749332	0.219867	0.183403	0.179621	2.05157	0.878498	0.470035
EVM0005388	5	9	Others	0.585844	0.896191	0.753698	1.22009	2.35412	3.55027	6.84114	10.1006	36.7753	3.92409	8.02103
EVM0004048	5	9	RLK-Pelle_LRR-I-1	0.778867	0.31084	1.34488	0.251702	0.629405	0.330147	0.317652	0.379125	18.0061	0.188737	2.09098
EVM0017652	4	10	CMGC_CDK-CRK7-CDK9	65.6823	40.1616	66.8188	59.6071	46.5692	36.0513	49.4424	55.2224	120.474	196.608	97.3135
EVM0018093	4	10	CMGC_SRPK	15.1827	18.4943	24.1211	19.5232	16.9858	17.625	20.5465	21.368	25.7118	35.6265	23.6752
EVM0013226	4	10	GARP-ARR-B	36.4456	31.7777	24.3622	87.4154	21.3023	18.1015	22.2054	25.8588	74.3353	179.832	78.3818
EVM0002531	4	10	NF-YB	1.33607	0.998957	1.33405	1.11702	0.025708	0	0.0821243	0.027998	0.159179	23.1663	0.372716
EVM0009664	4	10	RLK-Pelle_LRR-VI-1	8.06148	6.88295	5.41322	14.242	7.4353	9.6205	7.541	8.39909	10.7027	17.4279	12.6979
EVM0020925	4	10	RLK-Pelle_RLCK-Os	0.0534263	0.0615447	0.767589	0.126071	0.0366673	0.012559	0.01461	0.0128287	0.021263	3.25453	0.0873393
EVM0013617	4	10	RLK-Pelle_RLCK-XV	1.02282	2.90075	4.34546	12.2972	1.12666	0.954427	0.921783	0.338071	0.0451403	39.135	0
EVM0008175	4	10	WNK_NRBP	5.24413	94.8576	21.6229	52.8731	25.0864	18.4977	6.90682	10.8837	2.85916	186.085	12.8262
EVM0015247	1	10	CAMK_OST1L	8.833	10.3072	16.9006	10.6116	35.3912	36.9073	45.5836	69.6992	42.8997	82.7524	42.4421
EVM0022338	1	10	CMGC_GSK	73.1772	140.65	200.146	99.2092	265.33	259.662	247.517	164.272	133.881	370.508	225.604
EVM0004160	1	10	RLK-Pelle_LRR-Xb-2	3.02625	2.56426	8.3856	2.74464	10.1299	6.22679	4.68589	2.98065	3.9099	10.5018	7.99243
EVM0024980	32	11	C2C2-LSD	0.543158	0.439067	0.35578	0.358163	0.4288	0.323006	0.359488	0.49991	30.4591	4.144	60.4428
EVM0004841	32	11	CMGC_CDK-CDK7	4.02006	4.65124	9.21789	5.1166	6.06009	6.27145	5.42695	6.36223	8.92964	10.2023	15.1561
EVM0027276	32	11	LIM	29.3077	5.53141	3.36698	6.06535	2.19777	1.22787	4.01035	12.3073	45.6812	64.4055	154.06
EVM0002842	32	11	NEK	0.521678	0.358236	0.244004	1.14283	0.160414	0.118591	0.060936	0.169261	0.116041	1.02684	2.58781
EVM0026640	32	11	RB	1.80316	0.602176	0.69109	0.469479	0.549767	0.400943	0.313186	0.380911	0.61385	1.01082	3.84239
EVM0015333	32	11	RLK-Pelle_RLCK-V	3.8128	2.24187	2.1817	2.4443	0.888316	1.516	1.33768	1.20084	1.51709	2.22973	7.1909
Liquidambar_formosana_newGene_13716		11	Tify	0	0	0	0	0.0204847	0	0	0	0.283779	0.284562	4.23575
EVM0025939	12	11	GeBP	2.61907	11.9828	5.6883	12.1426	2.13677	2.34051	2.69109	1.15846	2.53528	8.47459	13.6105
EVM0024463	12	11	RLK-Pelle_CR4L	0.0617093	0	0.0476187	0.0519243	0.00798867	0	0.00714733	0.0489927	0.033112	0.331831	0.993041
EVM0018608	12	11	RLK-Pelle_LRR-VI-2	5.08734	5.60101	8.36056	8.54576	3.08096	2.84696	2.00168	3.76325	2.97782	4.21478	13.7219
EVM0003491	8	12	RLK-Pelle_LRR-XIIIa	26.6373	20.4662	22.98	26.3216	15.1086	14.9685	17.4811	22.1551	28.6392	43.6056	45.9225
EVM0024427	8	12	RLK-Pelle_RLCK-VIIb	1.49465	1.40118	1.12771	4.79064	1.07459	0.563176	0.69734	1.25202	0.786091	13.218	8.44568
EVM0009559	8	12	RLK-Pelle_URK-2	3.20006	0.596409	2.10557	1.39006	0.681103	0.172632	0.307297	0.769262	1.35272	5.60327	3.85799
EVM0027344	8	12	SWI/SNF-BAF60b	53.5582	40.6992	47.5224	56.494	59.5474	42.5293	58.2604	69.8232	52.4854	96.126	101.593
EVM0021049	13	12	CMGC_MAPK	31.4043	16.617	17.0172	22.1699	16.2808	10.924	17.7934	22.8727	101.002	43.9617	79.3392
EVM0021992	13	12	IWS1	24.2982	28.4204	42.4305	24.1564	73.9907	53.5395	56.6982	50.4494	116.816	78.9838	87.0289
EVM0013619	13	12	RLK-Pelle_LRR-VII-2	4.09812	5.5145	23.2609	6.89725	13.8282	15.1586	23.8908	21.9761	93.4981	37.7856	78.5622
EVM0020030	13	12	RLK-Pelle_LRR-XIV	7.0231	5.39918	14.522	11.2606	16.619	13.5756	17.4072	20.0764	73.9162	35.1977	62.5103
EVM0021514	13	12	RLK-Pelle_RKF3	14.1519	14.4847	45.8479	16.1482	33.4024	28.4848	23.0858	18.0133	78.0163	33.4009	48.6265
EVM0009338	13	12	RLK-Pelle_RLCK-II	22.157	23.4512	20.4576	22.8647	20.0859	23.5863	21.2933	18.5731	47.0441	25.8513	45.2542
EVM0016142	13	12	RLK-Pelle_RLCK-IV	24.795	30.1331	61.3228	41.68	33.1277	33.3486	36.9515	40.0571	180.832	106.581	174.949
EVM0028895	13	12	STE_STE7	25.6418	41.2282	62.5965	78.6163	81.2707	69.0738	59.5264	65.0869	188.245	78.6594	140.641
EVM0020509	7	12	RLK-Pelle_RLCK-XVI	4.52759	3.33619	4.04141	5.39499	3.90301	3.0753	3.51274	4.50172	13.1627	9.4803	12.2098
EVM0020783	7	12	TAZ	50.6186	24.7474	79.9149	41.6307	86.8085	54.3125	52.8371	54.4217	157.6	200.306	188.293
EVM0013674	7	12	TKL-Pl-5	14.2645	18.9908	44.0166	14.401	5.8473	4.51021	4.39872	4.12282	42.9445	38.637	63.7664

## Sheet: Fig4C. Mapman term and p-value
name	NEC	EC	PEM1	PEM2	GE	HE	TE	CE	L	R	S
Secondary metabolism	0.01110423399381375	0.2416189315866144	0.685650190731272	0.3906521047945293	1	1	1	1	0.5415011192356443	0.3906521047945293	0.9580365442029969
Phytohormone action	0.8447347655587789	0.2795222491029943	0.07528637955217432	0.5641978133256609	0.41813252481985885	0.6856005006335799	0.08286044054954413	0.42433819165883624	0.18397635031431994	0.5641978133256609	0.9355601232669201
Carbohydrate metabolism	0.8319708426484622	1	0.7185812585351357	0.3798217781399542	0.9566469596956503	0.9707540535504351	0.14409182817006477	0.8486053440181677	0.09013658379728762	0.3798217781399542	0.9146698676170728
Solute transport	0.39860294107761934	0.8758939786489408	0.12910372833372685	0.9848109719373555	0.8820293457751025	0.14796656021504395	0.9648097046373512	0.9495096481857641	0.6145208235305396	0.9848109719373555	0.729492568407685
Cell cycle organisation	0.9013599608327945	0.806211726821743	0.6067891190855909	0.34170343676232307	0.22126086099272801	0.10829510553401955	0.7471665239093483	0.4342310098953434	0.44674788175151403	0.34170343676232307	0.7205735289635885
RNA biosynthesis	0.6379422853999994	0.19875709975720118	0.10161402920674045	0.5594778366943034	0.18723782552946175	0.09305551132391443	0.5662655789938285	0.09155603652988016	2.7309669025355404E-4	0.5594778366943034	0.6849639915786734
Protein translocation	0.5656705131321603	0.09587087169508103	0.1743986824530698	1	0.5651404370436093	0.07569364885710961	0.05043780774581337	0.06151283845848036	0.7328324964767967	1	0.6236046701128353
Multi-process regulation	0.576300678865779	0.324849973991586	0.3636848922203911	0.025441316625266733	0.9526748397807504	0.6767499601522607	0.7278884550034594	0.5651805133815024	0.008507955381773423	0.025441316625266733	0.6191775872339518
Enzyme classification	0.042777503642726034	0.487457583776715	0.03720067684010209	0.12018271004758407	0.001829462253551295	0.4049645295276389	0.6485715870855782	0.1880593840927292	0.4272855837603866	0.12018271004758407	0.49389647438260287
Clade-specific metabolism	0.24450992918282544	0.21505257187443644	0.9945268575468164	1	1	1	1	1	1	1	0.33883102816173377
Lipid metabolism	0.37536547657591157	0.6534979532424119	0.663904255979892	0.06354560218017458	0.1277719005445972	0.14744239714079213	0.8242200105139128	0.07457394191031419	0.23494702687852184	0.06354560218017458	0.26772671418176636
External stimuli response	0.7173454746798922	0.5353139919191285	0.18398317490214033	0.3113021410615164	0.6110328420411619	0.057149866176547576	0.9720338929092812	0.424579509781124	0.02869948548614239	0.3113021410615164	0.2674638110485021
Amino acid metabolism	0.043319945937433844	0.13490334247149816	0.06433220238675676	1	0.651752535817324	0.6015829092081859	0.9014815691019002	0.39909473205104873	0.781530641350799	1	0.26515620772586895
RNA processing	0.01736061908282483	0.564030652509232	0.10255531797883329	0.17189899650872026	8.243256841041902E-4	0.7332678989325283	0.2230517737019374	0.3089101965273342	0.6504074822250736	0.17189899650872026	0.2516067788745984
Cytoskeleton organisation	0.4213194511724565	1	0.27039478125586974	0.39901900919114475	0.7261955461586609	0.403349723556839	0.05747537237128797	0.7337985868358764	0.904168888400485	0.39901900919114475	0.24379915859555745
Protein modification	0.06530572738861846	0.8954685895395675	0.03818316707972502	0.12305337142123557	0.1964114416534657	0.7019264409165215	0.767032047833989	0.14719545143398904	0.09537954052809132	0.12305337142123557	0.19541204770073084
Nutrient uptake	0.1971015814849138	0.08146565531812482	1	0.18731655262785715	0.4047740703528042	0.4504030523405018	0.4584247847336943	0.244281129106722	0.486761983028354	0.18731655262785715	0.19130207655017828
polyamine metabolism	0.000981294	0.8173602269443245	1	1	1	1	1	1	1	1	0.15948343267899867
Coenzyme metabolism	0.9719588412541549	0.1386313103644049	0.21693037047410257	0.7274633067064025	0.1893632709127952	0.9353859160953802	0.48132430527770675	0.33390796018900293	0.6988274051538372	0.7274633067064025	0.13382509431942155
Protein homeostasis	0.000286707	0.4273113444993851	0.3358843523514013	0.600715249695223	0.11746045508416292	0.35640929049904574	0.1193312845112899	0.3411651730763557	0.33632149284812823	1	0.11872931631462502
Redox homeostasis	0.07812521128278303	0.5147468843114729	0.35155661260231624	0.8244882661868612	0.13681616710835098	0.06192788467382471	0.940275463709048	0.005003771549470628	0.5248429420291187	0.8244882661868612	0.11364716966960535
Cell wall organisation	0.033015493739091184	0.47470642373034444	0.8416181704549062	0.9600619398195565	0.18841968395589243	0.1415601398483477	0.12085233196626313	0.4336437922812686	0.03952853149191491	0.9600619398195565	0.10393387929670461
DNA damage response	0.7084951496697739	0.6268305514008126	0.14779053861148145	1	0.40225767127265233	0.6350971976393744	0.11892909265818186	0.3900838617371881	1	1	0.10390620981640065
Photosynthesis	0.6996840114722254	0.45112559674105596	0.8081873184682994	1	0.37443690334070556	0.3628982879161348	0.29411302305052206	0.2111977370328988	1	1	0.08998319995404896
Vesicle trafficking	0.5258048152844785	0.9128905032818166	0.27039478125586974	0.14556041109593454	0.8509178670998074	0.09870970373122367	0.004390244293905887	0.5781590064142077	0.3702047845808129	0.14556041109593454	0.04961162673102388
Protein biosynthesis	0.4219062007189842	0.2793508544443708	0.402664	1	0.1547158419296039	0.016226615436320424	0.24414316037074557	0.2398112649325273	0.005575800953234955	0.600715249695223	1
cellular respiration	0.34235050766074354	0.2416189315866144	1	1	0.2393483100754078	0.28396949742660926	0.2632081938421661	0.7193412433866526	0.3402506540174055	0.20691027432416326	1
Chromatin organisation	1	0.4900948582048663	0.7463953497816691	0.20691027432416326	0.26426107979261165	0.7390340405494196	0.8744344845136434	0.8130455928077982	0.02838171589826291	1	1

## Sheet: Table legend
Supplementary Table 5: K-means clustering results
Sheet 1: Related to Figure 4A. A list of genes belong to each of the 18 clusters shown. The values shown are FPKM.
Sheet 2: Related to Figure 4B. Transcription factors extracted from 12 superclusters. Values are FPKM.
Sheet 3: Related to Figure. 4C. The p-value of each enriched Mapman category in each cluster. Mapman categories with few genes or without significant differences among clusters were not shown.
