# Supplementary material for: Global Transcriptome and Coexpression Network Analyses Reveal New Insights Into Somatic Embryogenesis in Hybrid Sweetgum (Liquidambar styraciflua × Liquidambar formosana)
Source: Front Plant Sci. 2021 Nov 22;12:751866. doi: 10.3389/fpls.2021.751866 (PMC8645980; doi:10.3389/fpls.2021.751866)
Supplement: Supplementary file 5 [file Table_5.XLSX]

## Sheet: Fig8. 82 SE-related genes
Supplementary Table 6: Differentially expressed SE-related genes during hybrid sweetgum SE.
#ID	Gene name	NEC	EC	PEM1	PEM2	GE	HE	TE	CE	L	R	S
EVM0013624	WOX9	1.14503	10.7813	9.09102	34.577	1.59139	2.52884	1.34787	0.51157	0	0	1.79558
EVM0023287	WOX4	26.3575	0	0.029703	0	0	0.0674587	0	0.806789	0.487824	11.759	45.4639
EVM0018585	WOX2	0.502407	15.2519	6.63456	23.4112	8.93874	8.85748	10.9682	10.4189	0.0243357	1.24492	0.909667
EVM0022977	WOX1	0	0	0.0322613	0.0449027	0.0782383	0.206316	0.176851	0.375874	0	0	1.04356
EVM0015563	WOX11	155.779	46.8342	80.4408	68.2094	29.1627	22.5207	21.6359	21.5819	62.5987	162.664	129.847
EVM0008817	ARF	34.4887	28.6904	30.5992	25.8746	17.9306	10.9373	12.8313	17.4698	10.7891	20.772	39.1317
EVM0016941	SERK	58.0446	50.3744	61.596	47.8523	39.6539	40.4997	27.6182	30.1334	18.2054	46.5025	61.1832
EVM0006595	SERK2	15.8018	16.5894	11.768	13.785	14.9122	19.18	14.9883	14.5715	5.02308	9.89682	19.5591
EVM0022193	LEA4	1.09408	442.435	253.042	263.881	886.604	731.954	912.466	985.549	4.09896	1.79129	9.07852
EVM0003362	WOX8	73.8704	24.1978	22.8407	22.7616	6.74804	12.606	9.6904	7.50036	4.15681	7.05536	16.7645
EVM0025911	WOX3	0	0	0	0.0509327	0.16791	0.895684	0.1349	0.562446	0	0	2.92209
EVM0014412	WOX11	0.28288	18.4571	63.1044	36.8356	28.839	26.8853	77.5581	47.9286	0	0.952421	0.114734
EVM0007971	WOX1	0	0.0896717	0.50918	0.215401	0.0817147	0.076372	0.074443	0.041785	0	0	0.483637
EVM0018444	CLV1-like	0.347275	0.29988	0.454923	0.570031	0.670092	1.29459	1.25917	2.13313	7.73968	2.0492	18.9009
EVM0001552	YUC7	0.535461	8.78003	22.1835	0.720746	6.78933	5.57061	7.34148	2.45221	0	0.139026	0.00875767
EVM0002362	CLV2	10.2043	4.99632	6.81775	11.0236	3.16246	3.24639	3.6711	3.94145	1.36766	4.52927	5.59071
EVM0011412	LEA	1.02485	49.9703	36.395	32.5383	179.408	146.755	182.389	165.201	2.23456	0.485138	0.853721
EVM0003550	LEA14	10.0765	302.41	183.321	95.6041	1022.55	905.37	1446.9	1316.55	414.278	473.608	395.074
EVM0020583	LEA14	66.0131	75.4601	98.4145	69.9142	96.8261	54.8741	96.302	58.6444	50.9173	119.477	21.9259
EVM0023588	LEA34	1.11493	184.175	91.6282	111.26	363.714	225.637	292.528	350.259	0.441688	0.47386	0.69496
EVM0000836	LEA29	1.97574	268.914	336.318	89.9868	1073.82	894.323	1160.26	992.174	36.2761	55.5125	165.487
EVM0022920	LEAB19.3-like	0.095145	86.9979	27.4808	46.018	227.676	195.519	310.24	305.184	0.0475943	0.326501	1.3491
EVM0002005	LEAB19.3-like	0.146117	67.1645	26.2898	39.9137	184.416	146.106	218.3	243.631	0	0.157512	0.33311
EVM0013779	IAA4	24.2946	38.9257	7.93286	7.86285	7.57739	7.59806	16.6487	16.1703	1.21451	1.15785	5.11093
EVM0010234	IAA31	8.36293	0.175424	0.300143	0.0618623	1.53642	1.12003	2.12139	3.29535	0.608424	1.35761	0.699309
EVM0023855	IAA31	3.70221	0.657762	0.145371	0.518391	0.33978	0.090303	0.130474	0.108369	0.382955	0.715675	0.854093
EVM0012108	IAA27	25.9053	1.70875	2.39045	1.29816	14.9378	24.2279	32.5655	40.7931	49.3066	61.1723	184.259
EVM0001755	IAA26	0.762832	0.138227	0.442947	0.0840157	0.288916	0.467466	0.964477	0.740348	28.2108	25.7154	158.982
EVM0018879	IAA1	62.6911	34.194	9.94894	0.894243	25.2874	21.2199	25.3709	18.2013	2.22398	4.52818	4.40064
EVM0005259	IAA16	74.2684	22.0288	26.729	31.5057	4.99949	1.70952	7.95894	16.8509	18.9338	1.12915	12.9204
EVM0027798	IAA13	82.033	8.48407	7.56169	5.22806	10.8344	16.4294	37.864	25.5378	8.86858	26.4379	49.2629
EVM0003074	IAA1	52.4284	19.6658	19.0867	5.88286	41.1196	53.2784	70.2679	69.902	214.115	90.3375	98.619
EVM0022066	AUX22	86.4687	8.49411	8.85328	0.565785	7.16845	6.94924	5.48771	11.6261	0.931103	3.06829	7.64638
EVM0011769	ARF9	5.938	12.4806	26.1224	15.9564	51.0172	47.2863	60.6998	83.8142	59.4448	41.1779	76.0164
EVM0026553	ARF5	54.0771	174.838	114.425	152.1	84.1884	104.455	50.9894	38.6631	4.27574	41.8164	32.5573
EVM0015120	ARF4	10.5164	1.3024	1.21842	2.09871	3.36511	3.26354	3.88291	5.28547	8.52051	16.5396	49.1546
Liquidambar_formosana_newGene_8795	ARF3	6.48587	8.91049	8.29526	14.2413	4.36808	3.57325	3.77245	5.64525	0.387564	1.36325	2.93903
EVM0007203	ARF3	29.7886	12.692	9.17644	15.7285	11.1953	18.5376	13.2658	12.9858	32.3333	32.0398	60.8969
EVM0018848	ARF3	50.9685	59.6319	74.0622	78.6416	160.887	155.478	215.868	220.213	134.563	97.5586	136.107
EVM0001418	ARF1	13.2736	18.5255	41.0452	26.3999	26.574	26.4763	29.6897	31.0766	33.0356	31.222	39.2479
EVM0014738	ARF19	60.1065	32.6182	41.3125	62.7528	40.7421	37.3002	42.6709	41.7252	16.762	25.0891	43.3339
EVM0008914	ARF18	43.6233	33.5592	37.6074	72.5704	34.4375	32.016	46.6306	63.8426	56.3437	84.6143	93.0256
EVM0010809	ARF17	18.1312	45.7679	31.807	28.5799	12.0467	9.35188	9.06907	6.44387	5.67539	5.73726	4.68152
EVM0013106	BBM1	32.4361	204.586	106.864	90.6374	71.4421	63.196	67.0972	38.0659	0.05051	1.83248	0.255299
EVM0010199	ANT2	26.92	0.058739	0.172342	0.456406	1.64098	6.29474	2.05185	2.20863	0.237318	4.61663	19.7552
EVM0005677	ANT	36.9477	0.628707	2.12152	6.86946	9.65306	15.5995	20.3311	10.2828	1.29201	6.54713	34.3695
EVM0013939	AIL6	101.677	127.923	56.5285	75.808	106.277	107.335	132.013	88.5272	0.020923	2.7905	1.82826
EVM0005829	AIL5	70.3443	157.276	94.602	113.303	358.549	422.442	423.833	335.794	0.50515	24.1108	22.1172
EVM0008344	LEA8	111.325	237.887	189.977	228.386	116.528	99.273	155.95	187.585	249.682	183.07	285.243
EVM0028438	LEA5	101.919	161.853	328.224	217.36	299.685	251.931	327.688	328.642	3775.3	1409.79	1776.21
EVM0005964	LEA	83.632	39.2296	284.62	19.207	135.428	154.03	91.21	73.6505	173.473	170.034	135.945
EVM0011791	LEA	6.61639	3.08506	15.9327	10.2117	1.27201	0.870321	0.550146	0.53985	0.163505	13.2965	23.9526
EVM0003818	ECP40	0	1.28797	3.21668	3.49273	34.7855	14.3856	17.4698	30.0503	3.18776	0	0
EVM0013806	IAA9	479.286	131.687	98.5465	150.149	90.5602	107.984	134.839	158.442	202.331	201.642	517.741
EVM0025206	IAA4	40.1983	10.0213	8.94483	0.71655	6.4308	5.32336	5.87563	4.08741	0	0.101458	0.450069
EVM0029381	IAA4	165.439	131.858	88.8173	79.6845	78.6157	77.3875	80.7312	67.9823	95.4896	89.5375	93.3603
EVM0000528	IAA4	156.393	115.559	90.1407	71.5436	65.2753	52.9664	53.7493	47.6187	87.6987	75.6999	95.5141
EVM0015927	IAA26	2.40923	3.47477	3.61612	2.87048	2.56131	3.35317	2.70486	2.55906	0.476576	1.17523	2.17253
EVM0002812	IAA14	3.76319	4.91404	4.23073	5.09918	4.85622	4.44305	3.55566	3.86794	0.700537	3.45894	2.719
EVM0026875	IAA14	7.39718	0.212304	0.382641	5.92981	0.677606	0.0923177	0.081272	1.29031	45.0953	17.6687	69.4253
EVM0016752	IAA14	2.85267	0	0.0216187	1.71446	0.0847	0.059819	0	0.375588	20.4317	5.16961	26.0234
EVM0001306	ARF6	26.0072	24.0518	28.2744	34.113	14.6153	11.9458	10.1719	10.7406	7.64036	23.2785	27.4341
EVM0000182	ARF2	0.158116	0.190274	0.45046	0.245977	0.826175	0.864415	1.09065	2.42463	0	0.032118	0.503448
EVM0000336	ARF2	0.338219	0.247115	0.178245	1.01818	0.621425	0.466541	0.632451	0.575488	0.0155053	0.050566	0.094827
EVM0025225	ARF19	6.8363	13.4243	7.07248	23.495	5.94061	6.28826	4.44538	4.67924	5.93758	6.62054	6.39132
EVM0001543	ARF18	19.3487	62.0991	44.0921	50.5857	22.7538	14.4152	11.9258	10.7732	4.46177	8.19862	7.32787
EVM0018324	ARF1	19.3541	28.1015	47.6834	32.976	32.878	31.1067	32.5018	31.9439	35.3124	38.3879	45.418
EVM0013754	IAA9	352.091	173.034	87.0361	142.325	80.9851	73.5092	65.8334	73.7635	40.3477	108.731	99.567
EVM0029406	IAA33	21.9251	28.5032	80.0646	65.9391	37.8523	31.5066	30.2013	10.3882	0.628885	13.0469	2.33855
EVM0015059	GNOM	13.3636	6.06799	7.91706	8.38927	4.86083	4.20137	5.39732	5.34283	3.50006	7.39002	5.43884
EVM0018804	GNOM	7.50613	6.46112	7.20121	8.71188	4.95834	5.04562	5.19821	5.684	3.29548	5.18776	5.28311
EVM0015855	GNOM	7.66275	5.88991	7.33364	8.45777	4.88497	4.61515	4.72822	5.28113	1.69662	4.68799	4.11884
EVM0016854	GNOM	4.4701	2.2049	2.56163	2.80153	1.24737	0.920068	1.29959	1.07846	0.381848	1.89114	1.31822
EVM0016488	PLT2	80.8582	141.94	102.132	156.852	60.8479	44.2747	50.7748	21.8947	0	1.90658	1.06565
EVM0009891	BBM1	3.77759	29.128	16.034	16.8616	13.5862	9.41739	10.2226	7.80204	0	0.360817	0
EVM0008236	AIL7	38.823	70.4712	48.9296	67.5177	32.3943	30.5235	30.8244	41.8225	7.73697	11.4824	20.0072
EVM0007357	AIL1	0	0.0344597	0.113799	0.00838667	2.06398	3.52799	2.92973	5.35334	0	0	1.98712
EVM0003173	ABI3	0.246205	55.9216	37.15	43.8058	70.229	57.0827	82.6183	72.4629	0	0	0.00445167
EVM0020968	ABI3	0.102616	35.3646	35.7381	33.4213	105.307	29.9292	77.6157	65.062	0	0	0
EVM0010216	PKL	14.6624	13.3492	14.3212	17.3872	13.1047	12.7777	10.4347	11.3117	8.12314	9.59155	12.5145
EVM0001986	AGL15	0.220558	14.9454	10.3697	9.98006	12.9651	13.1131	17.4802	10.7729	0	0.111871	0.216912
EVM0019283	AGL15	0	0	0	0	0	0	0	0	0	0	0
